# Supplementary material for: Chronic adolescent exposure to cannabis in mice leads to sex-biased changes in gene expression networks across brain regions
Source: bioRxiv preprint, doi:10.1101/2021.11.30.470393, version 3 (2022-04-01)
Supplement: Table S5 [file 470393_file18.xlsx]

## Sheet: f.AMY
Module	Database	Term	Overlap	P.value	Adjusted.P.value	Odds.Ratio	Combined.Score	Genes
Black	KEGG_2019_Human.1	Adrenergic signaling in cardiomyocytes	10/145	2.05405e-05	0.00392323	5.80889	62.696	MYL4;MAPK11;PPP2R2B;TPM1;PPP2R5B;ADRB1;ADRA1B;MAPK14;SCN1B;PIK3R6
Black	BioCarta_2016.1	Regulation of ck1/cdk5 by type 1 glutamate receptors Homo sapiens h ck1Pathway	4/24	0.000241607	0.0176373	15.4062	128.306	PPP3CA;PRKAR1B;NCS1;CDK5R1
Blue	Reactome_2016.1	Extracellular matrix organization Homo sapiens R-HSA-1474244	45/283	1.29794e-10	1.07599e-07	3.33789	75.9874	COL17A1;TNXB;ITGB5;PCOLCE2;ELN;LOXL4;PLOD2;FBLN1;LTBP3;F11R;NID2;THBS1;LOXL1;FBLN5;LOXL2;EFEMP2;TTR;ADAMTS1;SERPINH1;COL10A1;ITGB6;A2M;CRTAP;VCAM1;LUM;MMP2;ITGA2;BGN;PCOLCE;GDF5;BMP7;DCN;BMP4;MMP14;COL5A1;MMP15;COL4A4;COL5A3;COL4A3;COL8A2;ITGA8;COL8A1;COL9A3;FMOD;KLKB1
Blue	GO_Biological_Process_2018.1	cilium movement (GO:0003341)	17/49	4.27916e-10	1.18918e-06	9.23738	199.27	DNAH3;CFAP61;SPAG17;DNAI2;DNAH11;CFAP73;CCDC114;DNAAF1;CFAP206;CFAP100;TEKT1;ARMC4;TEKT3;TEKT4;CFAP54;CFAP53;GAS8
Blue	Reactome_2016.2	Elastic fibre formation Homo sapiens R-HSA-1566948	14/41	1.9023e-08	7.88503e-06	8.99353	159.884	ITGB5;ELN;LOXL4;FBLN1;LTBP3;GDF5;BMP7;LOXL1;FBLN5;LOXL2;BMP4;EFEMP2;ITGA8;ITGB6
Blue	GO_Biological_Process_2018.2	extracellular matrix organization (GO:0030198)	34/229	1.30749e-07	0.000181675	3.0534	48.3964	ITGB5;ELN;LOXL4;F11R;NID2;THBS1;LOXL1;FBLN5;LOXL2;TTR;SERPINH1;COL10A1;ITGB6;A2M;VCAM1;LUM;MMP2;ITGA2;BGN;DCN;KIF9;MMP14;COL5A1;OPTC;MMP15;COL4A4;COL5A3;COL4A3;COL8A2;ITGA8;COL8A1;COL9A3;GAS6;KLKB1
Blue	GO_Biological_Process_2018.3	amide transport (GO:0042886)	8/15	3.76663e-07	0.000348916	19.7347	291.913	SLC5A6;SLC14A2;SLC46A1;TAP1;SLC38A3;PLTP;FOLR1;SLC19A1
Blue	Reactome_2016.3	Molecules associated with elastic fibres Homo sapiens R-HSA-2129379	10/30	2.7026e-06	0.000664346	8.64377	110.824	BMP4;EFEMP2;ITGB5;ITGA8;FBLN1;LTBP3;ITGB6;GDF5;BMP7;FBLN5
Blue	Reactome_2016.4	Collagen formation Homo sapiens R-HSA-1474290	17/85	3.20553e-06	0.000664346	4.33871	54.8874	COL17A1;CRTAP;PCOLCE2;LOXL4;PLOD2;PCOLCE;LOXL1;LOXL2;COL5A1;COL4A4;COL5A3;COL4A3;COL8A2;SERPINH1;COL10A1;COL8A1;COL9A3
Blue	Reactome_2016.5	Collagen biosynthesis and modifying enzymes Homo sapiens R-HSA-1650814	14/63	6.47209e-06	0.000997847	4.94984	59.1408	COL17A1;CRTAP;PCOLCE2;PLOD2;PCOLCE;COL5A1;COL4A4;COL5A3;COL4A3;COL8A2;SERPINH1;COL10A1;COL8A1;COL9A3
Blue	Reactome_2016.6	Defective CHST6 causes MCDC1 Homo sapiens R-HSA-3656225	5/7	9.6294e-06	0.000997847	43.0629	497.406	LUM;OGN;PRELP;KERA;FMOD
Blue	Reactome_2016.7	Defective ST3GAL3 causes MCT12 and EIEE15 Homo sapiens R-HSA-3656243	5/7	9.6294e-06	0.000997847	43.0629	497.406	LUM;OGN;PRELP;KERA;FMOD
Blue	Reactome_2016.8	Defective B4GALT1 causes B4GALT1-CDG (CDG-2d) Homo sapiens R-HSA-3656244	5/7	9.6294e-06	0.000997847	43.0629	497.406	LUM;OGN;PRELP;KERA;FMOD
Blue	DisGeNET.1	Kartagener Syndrome	21/111	6.11594e-07	0.0022336	4.0597	58.0829	TTC25;DNAH3;DNAH11;DNAI2;SLC22A5;DNAAF3;DNAAF1;CCDC114;DNAH6;ETFDH;DNAJB13;FOXJ1;ZIC4;AK7;CFAP298;RSPH1;ZIC2;ARMC4;ZMYND10;CDR2;GAS8
Blue	DisGeNET.2	Polynesian Bronchiectasis	12/39	7.21213e-07	0.0022336	7.6946	108.82	TTC25;CFAP298;DNAH11;DNAI2;RSPH1;DNAAF3;CCDC114;DNAAF1;ARMC4;DNAJB13;ZMYND10;GAS8
Blue	GO_Biological_Process_2018.4	cilium organization (GO:0044782)	27/192	7.10832e-06	0.00397743	2.85153	33.8028	CFAP61;SPAG16;TRAF3IP1;DNAH6;CFAP126;CATIP;TCTN2;TEKT1;TEKT3;TEKT4;RILP;DNAI2;DNAAF1;CCDC113;RFX2;DCDC2;FOXJ1;FUZ;FAM161A;RILPL2;TTC30B;UBXN10;TMEM237;WDPCP;ALPK3;MNS1;CFAP54
Blue	GO_Biological_Process_2018.5	axonemal dynein complex assembly (GO:0070286)	10/33	7.15622e-06	0.00397743	7.51513	89.0357	DNAH3;DNAI2;CFAP100;CFAP73;DNAAF3;CCDC114;DNAAF1;ARMC4;ZMYND10;DNALI1
Blue	Reactome_2016.9	Diseases associated with glycosaminoglycan metabolism Homo sapiens R-HSA-3560782	8/26	5.30652e-05	0.00488789	7.67012	75.5046	LUM;OGN;BGN;PRELP;KERA;GPC4;FMOD;DCN
Blue	DisGeNET.3	Liver Cirrhosis, Experimental	75/801	4.73847e-06	0.00978335	1.82792	22.4099	TNFAIP8;SLC46A1;OLFML2B;STEAP4;CPQ;SNAP23;PLOD2;WFDC2;CNDP1;LOXL2;LGALS3;CASP7;LGALS1;RGS3;ALDH2;ENPP2;TSPO;ACP5;ITGB6;CD36;LBP;CLIC1;APOBEC1;UNC5CL;ANXA1;ANXA2;MMP2;ANXA4;IGFBP2;BGN;TAP2;GPX8;KRT8;EMP1;PRLR;INMT;PLSCR1;ACOX2;MMP15;PPP1R3B;TAX1BP3;S100A9;TOR4A;CD63;MVP;GCNT1;NLRC5;CAPG;NID2;INS;PRTG;HLA-DMB;RDH10;SLAMF9;SERPINH1;IGFBP7;A2M;PLTP;CD74;CRTAP;STARD13;GSTM1;PKLR;AADAT;LUM;GGH;BMP7;DHR…
Blue	Reactome_2016.10	Assembly of collagen fibrils and other multimeric structures Homo sapiens R-HSA-2022090	11/54	0.000145232	0.0120397	4.42106	39.0697	COL5A1;COL4A4;COL5A3;COL4A3;COL8A2;LOXL4;COL10A1;COL8A1;PCOLCE;LOXL1;LOXL2
Blue	DisGeNET.4	Ciliary Motility Disorders	14/64	7.86816e-06	0.0121838	4.85059	57.0074	DNAI2;DNAH11;SPEF2;DNAAF3;CCDC114;DNAAF1;DNAH6;FOXJ1;AK7;CFAP298;RSPH1;ARMC4;ZMYND10;GAS8
Blue	DisGeNET.5	Ehlers-Danlos Syndrome	18/105	1.60328e-05	0.0198615	3.59034	39.6405	ROBO3;TNXB;DMPK;C1S;C1R;ELN;PRDM5;BGN;PLOD2;SLC39A13;AEBP1;FBLN5;DCN;EFEMP2;COL5A1;MMRN1;COL5A3;COL9A3
Blue	Reactome_2016.11	Reversible hydration of carbon dioxide Homo sapiens R-HSA-1475029	5/12	0.00028778	0.0198808	12.3004	100.289	CA12;CA5B;CA9;CA14;CA13
Blue	Reactome_2016.12	Keratan sulfate degradation Homo sapiens R-HSA-2022857	5/12	0.00028778	0.0198808	12.3004	100.289	LUM;OGN;PRELP;KERA;FMOD
Blue	DisGeNET.6	Pelvic Organ Prolapse	10/37	2.20152e-05	0.022727	6.40042	68.6367	FHAD1;MMRN1;CALD1;LUM;ELN;MMP2;THBS1;LOXL1;FBLN5;DCN
Blue	GO_Biological_Process_2018.6	sulfur compound catabolic process (GO:0044273)	9/35	8.70416e-05	0.0313531	5.97678	55.8776	GGT5;LUM;CTH;OGN;BGN;PRELP;KERA;FMOD;DCN
Blue	GO_Biological_Process_2018.7	bicellular tight junction assembly (GO:0070830)	8/28	9.5668e-05	0.0313531	6.90238	63.8789	OCLN;CLDN3;FRMPD2;MARVELD3;TBCD;F11R;CLDN1;CRB3
Blue	GO_Biological_Process_2018.8	cilium movement involved in cell motility (GO:0060294)	5/10	0.000100478	0.0313531	17.2224	158.542	TEKT1;TEKT3;TEKT4;CFAP54;GAS8
Blue	GO_Biological_Process_2018.9	negative regulation of developmental process (GO:0051093)	13/70	0.000101539	0.0313531	3.94589	36.2827	ANXA2;FOXJ1;FUZ;HOPX;LOXL2;BMP4;WNT11;NFIB;SFRP5;SOSTDC1;SOX9;SINHCAF;GAS6
Blue	Reactome_2016.13	Keratan sulfate biosynthesis Homo sapiens R-HSA-2022854	7/27	0.000507454	0.0323599	6.03406	45.775	B4GALT1;LUM;OGN;PRELP;ST3GAL6;KERA;FMOD
Blue	GO_Biological_Process_2018.10	lung development (GO:0030324)	8/29	0.00012577	0.0346166	6.57334	59.0356	BMP4;WNT11;ZIC3;DNAAF1;PDPN;TCF21;FOXJ1;STRA6
Blue	GO_Biological_Process_2018.11	inner dynein arm assembly (GO:0036159)	6/16	0.000137021	0.0346166	10.3401	91.9795	DNAH3;CFAP100;CFAP73;DNAAF1;ZMYND10;DNALI1
Blue	WikiPathways_2019_Human.1	miRNA targets in ECM and membrane receptors WP2911	7/22	0.000124145	0.0399746	8.04755	72.3802	TNXB;ITGB5;COL5A1;COL5A3;ITGB6;THBS2;THBS1
Blue	Reactome_2016.14	ECM proteoglycans Homo sapiens R-HSA-3000178	10/55	0.000750297	0.0444283	3.83659	27.6044	TNXB;ITGB5;LUM;ITGA2;BGN;ITGA8;COL9A3;ITGB6;FMOD;DCN
Blue	GO_Biological_Process_2018.12	ureteric bud development (GO:0001657)	6/17	0.000201913	0.0467598	9.39964	79.969	BMP4;WNT11;SIX1;TCF21;FOXJ1;BMP7
Blue	Reactome_2016.15	SLC-mediated transmembrane transport Homo sapiens R-HSA-425407	28/268	0.000894141	0.0478622	2.02678	14.2273	SLC22A6;SLC44A3;SLC22A5;SLC2A1;SLC4A1;SLC4A2;SLC6A20;SLC7A10;SLC4A5;SLC22A18;SLC16A8;SLC38A3;SLC12A7;SLC39A4;SLC14A2;SLC12A4;SLC13A4;SLC31A1;SLC2A12;SLC5A6;SLCO1C1;SLC5A8;SLCO2A1;SLCO1A2;SLC29A4;SLC26A7;SLC24A5;SLC28A3
Blue	Reactome_2016.16	Crosslinking of collagen fibrils Homo sapiens R-HSA-2243919	4/9	0.000923758	0.0478622	13.7654	96.1796	LOXL4;PCOLCE;LOXL1;LOXL2
Blue	GO_Biological_Process_2018.13	axoneme assembly (GO:0035082)	7/24	0.000228661	0.0488807	7.10003	59.5214	SPAG16;SPAG17;RSPH1;DNAAF3;DNAAF1;DNAJB13;CFAP206
Blue	Reactome_2016.17	Integrin cell surface interactions Homo sapiens R-HSA-216083	11/67	0.00101377	0.0494362	3.3924	23.3875	VCAM1;ITGB5;LUM;ITGA2;COL4A4;COL4A3;ITGA8;COL9A3;ITGB6;F11R;THBS1
Darkgrey	KEGG_2019_Human.1	Neuroactive ligand-receptor interaction	16/338	2.03782e-06	0.000330127	4.5157	59.1721	NPFFR1;OPRL1;GRIK1;GPR50;OXT;TRH;AGT;HCRTR2;BRS3;MC4R;ADCYAP1;GLRA2;HRH1;HTR7;CCKAR;UCN3
Darkgrey	Reactome_2016.1	Peptide ligand-binding receptors Homo sapiens R-HSA-375276	10/193	8.29683e-05	0.0335192	4.86513	45.7178	MC4R;NPFFR1;CCKAR;PNOC;OPRL1;OXT;TRH;AGT;HCRTR2;BRS3
Darkgrey	Reactome_2016.2	GPCR ligand binding Homo sapiens R-HSA-500792	15/447	0.000220721	0.0445857	3.12306	26.2918	FZD1;NPFFR1;OPRL1;WNT7A;OXT;TRH;AGT;HCRTR2;BRS3;MC4R;ADCYAP1;HRH1;HTR7;CCKAR;PNOC
Darkorange	KEGG_2019_Human.1	Ubiquitin mediated proteolysis	11/137	1.74232e-05	0.00402477	5.34866	58.609	PIAS4;UBE2W;FZR1;ANAPC7;UBE2R2;KEAP1;UBE2E2;VHL;UBE2G2;UBE2J2;UBE2M
Darkorange	Reactome_2016.1	Antigen processing: Ubiquitination & Proteasome degradation Homo sapiens R-HSA-983168	16/260	7.24404e-06	0.00475934	4.0568	48.0136	ANAPC7;KEAP1;UBE2E2;UBE2G2;UBE2J2;FBXO44;UBAC1;UBE2W;RNF126;FZR1;UBE2R2;ASB6;RBCK1;VHL;RNF220;UBE2M
Darkorange	Reactome_2016.2	Class I MHC mediated antigen processing & presentation Homo sapiens R-HSA-983169	16/305	5.13151e-05	0.00585749	3.41719	33.7533	ANAPC7;KEAP1;UBE2E2;UBE2G2;UBE2J2;FBXO44;UBAC1;UBE2W;RNF126;FZR1;UBE2R2;ASB6;RBCK1;VHL;RNF220;UBE2M
Darkorange	Reactome_2016.3	Insulin receptor recycling Homo sapiens R-HSA-77387	5/26	5.86893e-05	0.00585749	14.3949	140.253	ATP6AP1;ATP6V0E2;ATP6V0D1;ATP6V0C;ATP6V1C1
Darkorange	Reactome_2016.4	HIV Transcription Elongation Homo sapiens R-HSA-167169	6/43	7.02641e-05	0.00585749	9.82633	93.9716	CDK9;POLR2C;POLR2E;NELFB;NELFCD;GTF2H4
Darkorange	Reactome_2016.5	Tat-mediated elongation of the HIV-1 transcript Homo sapiens R-HSA-167246	6/43	7.02641e-05	0.00585749	9.82633	93.9716	CDK9;POLR2C;POLR2E;NELFB;NELFCD;GTF2H4
Darkorange	Reactome_2016.6	Formation of HIV-1 elongation complex containing HIV-1 Tat Homo sapiens R-HSA-167200	6/43	7.02641e-05	0.00585749	9.82633	93.9716	CDK9;POLR2C;POLR2E;NELFB;NELFCD;GTF2H4
Darkorange	Reactome_2016.7	Formation of HIV elongation complex in the absence of HIV Tat Homo sapiens R-HSA-167152	6/44	8.02395e-05	0.00585749	9.56725	90.2239	CDK9;POLR2C;POLR2E;NELFB;NELFCD;GTF2H4
Darkorange	Reactome_2016.8	RNA Polymerase II Transcription Elongation Homo sapiens R-HSA-75955	6/44	8.02395e-05	0.00585749	9.56725	90.2239	CDK9;POLR2C;POLR2E;NELFB;NELFCD;GTF2H4
Darkorange	Reactome_2016.9	Formation of RNA Pol II elongation complex Homo sapiens R-HSA-112382	6/44	8.02395e-05	0.00585749	9.56725	90.2239	CDK9;POLR2C;POLR2E;NELFB;NELFCD;GTF2H4
Darkorange	Reactome_2016.10	Transferrin endocytosis and recycling Homo sapiens R-HSA-917977	5/29	0.00010174	0.00668434	12.5936	115.774	ATP6AP1;ATP6V0E2;ATP6V0D1;ATP6V0C;ATP6V1C1
Darkorange	Reactome_2016.11	Pausing and recovery of Tat-mediated HIV elongation Homo sapiens R-HSA-167238	5/31	0.000141685	0.00725637	11.6237	103.008	CDK9;POLR2C;POLR2E;NELFB;NELFCD
Darkorange	Reactome_2016.12	Tat-mediated HIV elongation arrest and recovery Homo sapiens R-HSA-167243	5/31	0.000141685	0.00725637	11.6237	103.008	CDK9;POLR2C;POLR2E;NELFB;NELFCD
Darkorange	Reactome_2016.13	HIV elongation arrest and recovery Homo sapiens R-HSA-167287	5/32	0.00016567	0.00725637	11.1926	97.4372	CDK9;POLR2C;POLR2E;NELFB;NELFCD
Darkorange	Reactome_2016.14	Pausing and recovery of HIV elongation Homo sapiens R-HSA-167290	5/32	0.00016567	0.00725637	11.1926	97.4372	CDK9;POLR2C;POLR2E;NELFB;NELFCD
Darkorange	Reactome_2016.15	Elongation arrest and recovery Homo sapiens R-HSA-112387	5/32	0.00016567	0.00725637	11.1926	97.4372	CDK9;POLR2C;POLR2E;NELFB;NELFCD
Darkorange	Reactome_2016.16	Formation of the Early Elongation Complex Homo sapiens R-HSA-113418	5/33	0.000192636	0.00744482	10.7923	92.325	POLR2C;POLR2E;NELFB;NELFCD;GTF2H4
Darkorange	Reactome_2016.17	Formation of the HIV-1 Early Elongation Complex Homo sapiens R-HSA-167158	5/33	0.000192636	0.00744482	10.7923	92.325	POLR2C;POLR2E;NELFB;NELFCD;GTF2H4
Darkorange	Reactome_2016.18	Asparagine N-linked glycosylation Homo sapiens R-HSA-446203	13/259	0.000392788	0.0143368	3.23808	25.3938	B4GALT3;TRAPPC1;RAB1B;DDOST;GMPPB;CNIH1;AMDHD2;NEU1;MGAT4B;PREB;CNIH2;YKT6;ST6GALNAC6
Darkorange	Reactome_2016.19	Metabolism of proteins Homo sapiens R-HSA-392499	33/1074	0.000455481	0.0157341	1.98837	15.2988	COX19;B4GALT3;HDAC3;GPAA1;RAB1B;AAAS;GMPPB;TUBA1B;GNG3;AMDHD2;NEU1;YKT6;PIAS4;KLHDC3;ZBTB17;EIF5B;PHC2;TRAPPC1;ASNS;TBCC;DDOST;CNIH1;EEF1D;GNB2;CSNK2B;MGAT4B;NUP35;PREB;GNB5;ATP6V0D1;INHA;CNIH2;ST6GALNAC6
Darkorange	Reactome_2016.20	TP53 Regulates Transcription of DNA Repair Genes Homo sapiens R-HSA-6796648	6/61	0.000499069	0.0157341	6.60438	50.2115	CDK9;POLR2C;POLR2E;NELFB;NELFCD;GTF2H4
Darkorange	Reactome_2016.21	Abortive elongation of HIV-1 transcript in the absence of Tat Homo sapiens R-HSA-167242	4/23	0.000502917	0.0157341	12.6903	96.3843	POLR2C;POLR2E;NELFB;NELFCD
Darkorange	GO_Biological_Process_2018.1	ferric iron transport (GO:0015682)	6/36	2.47368e-05	0.0188371	12.1235	128.596	ATP6AP1;ATP6V0E2;ATP6V0D1;ATP6V0C;ATP6V1C1;RAB11B
Darkorange	GO_Biological_Process_2018.2	transferrin transport (GO:0033572)	6/36	2.47368e-05	0.0188371	12.1235	128.596	ATP6AP1;ATP6V0E2;ATP6V0D1;ATP6V0C;ATP6V1C1;RAB11B
Darkorange	KEGG_2019_Human.2	Vibrio cholerae infection	6/50	0.00016624	0.0192008	8.2601	71.88	ATP6AP1;ATP6V0D1;ATP6V0E2;ATP6V0C;ATP6V1C1;ACTG1
Darkorange	Reactome_2016.22	RNA Polymerase II Pre-transcription Events Homo sapiens R-HSA-674695	6/64	0.000646607	0.01931	6.26181	45.9853	CDK9;POLR2C;POLR2E;NELFB;NELFCD;GTF2H4
Darkorange	Reactome_2016.23	Iron uptake and transport Homo sapiens R-HSA-917937	5/43	0.000682825	0.019505	7.94818	57.9364	ATP6AP1;ATP6V0E2;ATP6V0D1;ATP6V0C;ATP6V1C1
Darkorange	Reactome_2016.24	Transcription of the HIV genome Homo sapiens R-HSA-167172	6/67	0.000825874	0.0226083	5.95294	42.2604	CDK9;POLR2C;POLR2E;NELFB;NELFCD;GTF2H4
Darkorange	GO_Biological_Process_2018.3	regulation of viral transcription (GO:0046782)	6/40	4.61165e-05	0.0234118	10.695	106.782	CDK9;POLR2C;POLR2E;NELFB;NELFCD;TRIM27
Darkorange	Reactome_2016.25	COPII (Coat Protein 2) Mediated Vesicle Transport Homo sapiens R-HSA-204005	6/68	0.000893429	0.0234793	5.85663	41.1161	TRAPPC1;CNIH1;RAB1B;PREB;CNIH2;YKT6
Darkorange	GO_Biological_Process_2018.4	positive regulation of viral process (GO:0048524)	6/44	8.02395e-05	0.0259961	9.56725	90.2239	CDK9;POLR2C;CFL1;POLR2E;NELFB;NELFCD
Darkorange	GO_Biological_Process_2018.5	hydrogen ion transmembrane transport (GO:1902600)	5/28	8.53451e-05	0.0259961	13.1418	123.123	ATP6AP1;ATP6V0E2;ATP6V0D1;ATP6V0C;ATP6V1C1
Darkorange	KEGG_2019_Human.3	Oxidative phosphorylation	9/133	0.000368905	0.0284057	4.41951	34.9361	ATP6AP1;NDUFA10;UQCRC1;ATP6V0D1;ATP6V0E2;COX6A2;ATP6V0C;ATP5F1D;ATP6V1C1
Darkorange	Reactome_2016.26	Late Phase of HIV Life Cycle Homo sapiens R-HSA-162599	8/128	0.00130047	0.0328618	4.04762	26.8966	CDK9;POLR2C;POLR2E;NUP35;NELFB;NELFCD;AAAS;GTF2H4
Darkorange	GO_Biological_Process_2018.6	proton transport (GO:0015992)	5/31	0.000141685	0.0334346	11.6237	103.008	ATP6AP1;ATP6V0E2;ATP6V0D1;ATP6V0C;ATP6V1C1
Darkorange	GO_Biological_Process_2018.7	Rab protein signal transduction (GO:0032482)	7/70	0.000153672	0.0334346	6.74475	59.2236	RAB3A;RAB4B;GDI1;RAB40C;RAB1B;RAB35;RAB11B
Darkorange	Reactome_2016.27	Protein folding Homo sapiens R-HSA-391251	7/101	0.0014284	0.0347578	4.51327	29.5673	TUBA1B;GNG3;HDAC3;GNB2;CSNK2B;TBCC;GNB5
Darkorange	KEGG_2019_Human.4	Mitophagy	6/65	0.000702627	0.0372885	6.15537	44.6922	BECN1;BNIP3;CSNK2B;TBC1D17;SQSTM1;BCL2L1
Darkorange	KEGG_2019_Human.5	Collecting duct acid secretion	4/27	0.000946297	0.0372885	10.4812	72.9801	ATP6V0E2;ATP6V0D1;ATP6V0C;ATP6V1C1
Darkorange	KEGG_2019_Human.6	Phagosome	9/152	0.000968533	0.0372885	3.82857	26.5693	TUBA1B;HLA-DMA;ATP6AP1;TUBB;ATP6V0D1;ATP6V0E2;ATP6V0C;ATP6V1C1;ACTG1
Darkorange	GO_Biological_Process_2018.8	autophagosome organization (GO:1905037)	6/56	0.000312658	0.0478714	7.26667	58.6449	BECN1;MAP1LC3A;ATG16L1;RAB1B;RAB35;ATG4D
Darkorange	GO_Biological_Process_2018.9	protein modification by small protein conjugation (GO:0032446)	17/398	0.000357765	0.0478714	2.74973	21.8208	PIAS4;FBXO25;KEAP1;FBXL15;RTF1;UBE2G2;AAAS;UBE2J2;PDZD4;UBE2W;UBE2R2;KLHL8;NUP35;CCDC22;VHL;RNF220;UBE2M
Darkorange	GO_Biological_Process_2018.10	proteasome-mediated ubiquitin-dependent protein catabolic process (GO:0043161)	14/291	0.000364121	0.0478714	3.10175	24.5597	ANAPC7;SGTA;KCTD2;FBXL15;UBE2G2;UBE2J2;SPSB3;UBE2W;RNF126;UCHL1;FZR1;UBE2R2;RBCK1;KCTD17
Darkorange	GO_Biological_Process_2018.11	autophagosome assembly (GO:0000045)	6/58	0.000379156	0.0478714	6.98647	55.0363	BECN1;MAP1LC3A;ATG16L1;RAB1B;RAB35;ATG4D
Darkorange	GO_Biological_Process_2018.12	mitochondrion disassembly (GO:0061726)	5/38	0.000380841	0.0478714	9.15478	72.0767	BECN1;MAP1LC3A;BNIP3;SQSTM1;ATG4D
Darkorange	GO_Biological_Process_2018.13	DNA-templated transcription, elongation (GO:0006354)	8/108	0.00042502	0.0478714	4.86211	37.7464	CDK9;POLR2C;UBTF;POLR2E;NELFB;RTF1;NELFCD;GTF2H4
Darkorange	GO_Biological_Process_2018.14	autophagy of mitochondrion (GO:0000422)	5/40	0.000485987	0.0478714	8.63077	65.847	BECN1;MAP1LC3A;BNIP3;SQSTM1;ATG4D
Darkorange	GO_Biological_Process_2018.15	cellular copper ion homeostasis (GO:0006878)	3/10	0.00049012	0.0478714	25.7706	196.394	COX19;CCDC22;ATOX1
Darkorange	GO_Biological_Process_2018.16	regulation of transcription elongation from RNA polymerase II promoter (GO:0034243)	4/23	0.000502917	0.0478714	12.6903	96.3843	CDK9;RNF8;NELFB;RTF1
Darkorange	GO_Biological_Process_2018.17	positive regulation of viral transcription (GO:0050434)	5/41	0.000546085	0.0489228	8.3906	63.0363	CDK9;POLR2C;POLR2E;NELFB;NELFCD
Darkred	BioCarta_2016.1	Phosphoinositides and their downstream targets. Homo sapiens h ptdinsPathway	3/21	8.9997e-05	0.00242992	40.9424	381.408	LYN;GSK3A;PFKM
Darkred	BioCarta_2016.2	Erk and PI-3 Kinase Are Necessary for Collagen Binding in Corneal Epithelia Homo sapiens h ecmPathway	3/31	0.000295084	0.00398363	26.3069	213.829	DIAPH1;SRC;ACTN4
Darkred	BioCarta_2016.3	uCalpain and friends in Cell spread Homo sapiens h ucalpainPathway	2/17	0.00227539	0.0204785	32.3593	196.926	SRC;ACTN4
Darkred	KEGG_2019_Human.1	Viral carcinogenesis	6/201	0.000202676	0.0214837	7.77949	66.156	DDB1;LYN;KAT2A;SRC;ACTN4;SND1
Darkturquoise	KEGG_2019_Human.1	Sphingolipid metabolism	6/47	1.49317e-05	0.00223975	13.0066	144.53	GALC;UGT8;SGPL1;ASAH2;PLPP3;SGPP2
Darkturquoise	GO_Biological_Process_2018.1	respiratory system development (GO:0060541)	5/29	1.75035e-05	0.0240499	18.4492	202.076	CHD7;NKX2-1;PROX1;FGFR2;GLI2
Darkturquoise	GO_Biological_Process_2018.2	sphingolipid metabolic process (GO:0006665)	8/116	5.57143e-05	0.0359498	6.62088	64.8533	GALC;UGT8;SGPL1;ASAH2;PRKD3;ELOVL5;PLPP3;SGPP2
Darkturquoise	GO_Biological_Process_2018.3	negative regulation of cilium assembly (GO:1902018)	3/8	7.8493e-05	0.0359498	52.712	498.26	CCP110;MAP4;CEP97
Greenyellow	DisGeNET.1	Dyskinesia, Medication-Induced	5/16	6.65451e-08	7.94725e-05	66.3369	1096.24	PENK;DRD1;PDYN;DRD2;RGS9
Greenyellow	DisGeNET.2	Dyskinetic syndrome	8/78	7.73079e-08	7.94725e-05	17.0045	278.457	PNKD;ADORA2A;PENK;PPP1R1B;DRD1;PDYN;DRD2;RGS9
Greenyellow	DisGeNET.3	Dyskinesia, Drug-Induced	5/18	1.29059e-07	8.33137e-05	56.1256	890.32	PENK;DRD1;PDYN;DRD2;RGS9
Greenyellow	DisGeNET.4	Oral Dyskinesia	4/8	1.62089e-07	8.33137e-05	144.927	2265.95	PENK;PPP1R1B;DRD2;PDYN
Greenyellow	DisGeNET.5	Opioid abuse	4/13	1.61085e-06	0.000662379	64.3958	858.959	PENK;PPP1R1B;DRD1;PDYN
Greenyellow	KEGG_2019_Human.1	Rap1 signaling pathway	9/206	1.58628e-05	0.00161463	6.80503	75.206	MAP2K1;ADORA2A;RGS14;FLT4;P2RY1;DRD2;FGF3;RAP1GAP;SIPA1
Greenyellow	KEGG_2019_Human.2	Cocaine addiction	5/49	2.40989e-05	0.00161463	16.5567	176.053	PPP1R1B;DRD1;PDYN;DRD2;RGS9
Greenyellow	DisGeNET.6	Hemiballismus	3/7	1.17589e-05	0.00302205	107.908	1224.85	PPP1R1B;DRD2;PDYN
Greenyellow	DisGeNET.7	Asterixis	3/7	1.17589e-05	0.00302205	107.908	1224.85	PPP1R1B;DRD2;PDYN
Greenyellow	DisGeNET.8	Ballismus	3/7	1.17589e-05	0.00302205	107.908	1224.85	PPP1R1B;DRD2;PDYN
Greenyellow	DisGeNET.9	Involuntary Movements	4/23	1.8886e-05	0.0043144	30.4879	331.62	PNKD;PPP1R1B;PDYN;DRD2
Greenyellow	WikiPathways_2019_Human.1	Phosphodiesterases in neuronal function WP4222	5/53	3.54561e-05	0.00446747	15.1739	155.49	ADORA2A;PPP1R1B;DRD1;PDE7B;DRD2
Greenyellow	DisGeNET.10	Etat Marbre	4/24	2.25395e-05	0.00463412	28.962	309.901	ADORA2A;DRD1;PDYN;DRD2
Greenyellow	DisGeNET.11	Opiate Addiction	5/50	2.66257e-05	0.00464236	16.1879	170.518	PENK;PPP1R1B;DRD1;PDYN;DRD2
Greenyellow	DisGeNET.12	Tardive Dyskinesia	5/51	2.93534e-05	0.00464236	15.8352	165.258	ADORA2A;PPP1R1B;DRD1;DRD2;RGS9
Greenyellow	DisGeNET.13	Drug-induced tardive dyskinesia	5/51	2.93534e-05	0.00464236	15.8352	165.258	ADORA2A;PPP1R1B;DRD1;DRD2;RGS9
Greenyellow	WikiPathways_2019_Human.2	GPCRs, Class A Rhodopsin-like WP455	9/257	8.89362e-05	0.00560298	5.39159	50.2905	OPN3;MC1R;ADORA2A;P2RY1;HTR1B;GPR83;DRD1;DRD2;GPR6
Greenyellow	DisGeNET.14	Abnormal involuntary movement	3/12	7.20249e-05	0.0104158	47.9469	457.341	ADORA2A;DRD2;RGS9
Greenyellow	DisGeNET.15	Heroin Dependence	5/62	7.59906e-05	0.0104158	12.7722	121.143	PENK;HTR1B;DRD1;PDYN;DRD2
Greenyellow	KEGG_2019_Human.3	Alcoholism	7/180	0.000292059	0.0130453	5.94435	48.3784	MAP2K1;ADORA2A;GNG7;PPP1R1B;DRD1;PDYN;DRD2
Greenyellow	Reactome_2016.1	G alpha (i) signalling events Homo sapiens R-HSA-418594	9/240	5.2593e-05	0.0165142	5.79339	57.0818	OPN3;RGS14;GNG7;PENK;HTR1B;RGS20;PDYN;DRD2;RGS9
Greenyellow	KEGG_2019_Human.4	Neuroactive ligand-receptor interaction	9/338	0.000670929	0.0208004	4.04739	29.5737	MC1R;ADORA2A;PENK;P2RY1;HTR1B;GPR83;DRD1;PDYN;DRD2
Greenyellow	KEGG_2019_Human.5	cAMP signaling pathway	7/212	0.000776133	0.0208004	5.0083	35.8654	MAP2K1;ADORA2A;PPP1R1B;HTR1B;DRD1;DRD2;HCN2
Greenyellow	DisGeNET.16	Waxy flexibility	3/16	0.000179583	0.0216951	33.1873	286.236	PPP1R1B;DRD1;DRD2
Greenyellow	DisGeNET.17	Lingual-Facial-Buccal Dyskinesia	3/16	0.000179583	0.0216951	33.1873	286.236	PPP1R1B;PDYN;DRD2
Greenyellow	DisGeNET.18	Amphetamine-Related Disorders	5/76	0.000200489	0.0216951	10.2465	87.2462	ADORA2A;HTR1B;DRD1;PDYN;DRD2
Greenyellow	DisGeNET.19	Amphetamine Abuse	5/76	0.000200489	0.0216951	10.2465	87.2462	ADORA2A;HTR1B;DRD1;PDYN;DRD2
Greenyellow	DisGeNET.20	Amphetamine Addiction	5/77	0.000213208	0.0219178	10.1037	85.4087	ADORA2A;HTR1B;DRD1;PDYN;DRD2
Greenyellow	DisGeNET.21	Generalized seizures	6/126	0.00027169	0.0265998	7.31074	60.0274	ADORA2A;HTR1B;DRD1;PDYN;DRD2;ENG
Greenyellow	Reactome_2016.2	GPCR downstream signaling Homo sapiens R-HSA-388396	18/983	0.000193482	0.0269447	2.86526	24.4989	OR4D1;PRKCH;OPN3;RGS14;HTR1B;GPR83;PDYN;OR2AK2;MC1R;ADORA2A;GNG7;PENK;P2RY1;RGS20;DRD1;PDE7B;DRD2;RGS9
Greenyellow	Reactome_2016.3	Signaling by GPCR Homo sapiens R-HSA-372790	21/1293	0.000286467	0.0269447	2.55717	20.8611	OR4D1;MAP2K1;PRKCH;OPN3;RGS14;HTR1B;GPR83;PDYN;FGF3;OR2AK2;MC1R;ADORA2A;GNG7;PENK;PPP1R1B;P2RY1;RGS20;DRD1;PDE7B;DRD2;RGS9
Greenyellow	Reactome_2016.4	Class A/1 (Rhodopsin-like receptors) Homo sapiens R-HSA-373076	9/323	0.000484792	0.0269447	4.24399	32.3893	OPN3;MC1R;ADORA2A;PENK;P2RY1;HTR1B;DRD1;PDYN;DRD2
Greenyellow	Reactome_2016.5	Dopamine receptors Homo sapiens R-HSA-390651	2/5	0.000486686	0.0269447	95.2326	726.424	DRD1;DRD2
Greenyellow	Reactome_2016.6	G alpha (s) signalling events Homo sapiens R-HSA-418555	6/142	0.000514866	0.0269447	6.44542	48.8022	MC1R;ADORA2A;GNG7;GPR83;DRD1;PDE7B
Greenyellow	WikiPathways_2019_Human.3	Calcium Regulation in the Cardiac Cell WP536	6/149	0.00066354	0.0278687	6.12774	44.8423	PRKCH;RGS14;GNG7;ANXA6;RGS20;RGS9
Greenyellow	BioCarta_2016.1	Regulation of ck1/cdk5 by type 1 glutamate receptors Homo sapiens h ck1Pathway	3/24	0.000622811	0.0311405	20.5362	151.583	PPP1R1B;DRD1;DRD2
Greenyellow	GO_Biological_Process_2018.1	UV protection (GO:0009650)	3/10	3.9695e-05	0.031727	61.6522	624.801	MFAP4;SCARA3;MC1R
Greenyellow	GO_Biological_Process_2018.2	cardiac muscle fiber development (GO:0048739)	3/12	7.20249e-05	0.031727	47.9469	457.341	NEXN;MYOM2;MYOM3
Greenyellow	DisGeNET.22	Hypotension	5/89	0.000418666	0.0391262	8.65502	67.3226	ADORA2A;HTR1B;DRD1;PDYN;DRD2
Greenyellow	DisGeNET.23	Substance Dependence	6/140	0.000477574	0.0404088	6.54229	50.0275	PRKCH;PPP1R1B;HTR1B;DRD1;PDYN;DRD2
Greenyellow	DisGeNET.24	Catalepsy	3/24	0.000622811	0.0404088	20.5362	151.583	PPP1R1B;DRD1;DRD2
Greenyellow	DisGeNET.25	Visual seizure	7/207	0.000674418	0.0404088	5.13481	37.4927	ADORA2A;WFS1;HTR1B;DRD1;PDYN;DRD2;HCN2
Greenyellow	DisGeNET.26	Generalized Absence Seizures	5/101	0.000746856	0.0404088	7.56855	54.4908	ADORA2A;HTR1B;DRD1;PDYN;DRD2
Greenyellow	DisGeNET.27	Single Seizure	5/101	0.000746856	0.0404088	7.56855	54.4908	ADORA2A;HTR1B;DRD1;PDYN;DRD2
Greenyellow	DisGeNET.28	Gustatory seizure	5/101	0.000746856	0.0404088	7.56855	54.4908	ADORA2A;HTR1B;DRD1;PDYN;DRD2
Greenyellow	DisGeNET.29	Seizures, Auditory	5/101	0.000746856	0.0404088	7.56855	54.4908	ADORA2A;HTR1B;DRD1;PDYN;DRD2
Greenyellow	DisGeNET.30	Seizures, Clonic	5/101	0.000746856	0.0404088	7.56855	54.4908	ADORA2A;HTR1B;DRD1;PDYN;DRD2
Greenyellow	DisGeNET.31	Seizures, Sensory	5/101	0.000746856	0.0404088	7.56855	54.4908	ADORA2A;HTR1B;DRD1;PDYN;DRD2
Greenyellow	DisGeNET.32	Seizures, Somatosensory	5/101	0.000746856	0.0404088	7.56855	54.4908	ADORA2A;HTR1B;DRD1;PDYN;DRD2
Greenyellow	DisGeNET.33	Vertiginous seizure	5/101	0.000746856	0.0404088	7.56855	54.4908	ADORA2A;HTR1B;DRD1;PDYN;DRD2
Greenyellow	DisGeNET.34	Jacksonian Seizure	5/101	0.000746856	0.0404088	7.56855	54.4908	ADORA2A;HTR1B;DRD1;PDYN;DRD2
Greenyellow	DisGeNET.35	Atonic Absence Seizures	5/101	0.000746856	0.0404088	7.56855	54.4908	ADORA2A;HTR1B;DRD1;PDYN;DRD2
Greenyellow	DisGeNET.36	Non-epileptic convulsion	5/101	0.000746856	0.0404088	7.56855	54.4908	ADORA2A;HTR1B;DRD1;PDYN;DRD2
Greenyellow	DisGeNET.37	Nonepileptic Seizures	5/101	0.000746856	0.0404088	7.56855	54.4908	ADORA2A;HTR1B;DRD1;PDYN;DRD2
Greenyellow	DisGeNET.38	Olfactory seizure	5/101	0.000746856	0.0404088	7.56855	54.4908	ADORA2A;HTR1B;DRD1;PDYN;DRD2
Greenyellow	DisGeNET.39	Schizophreniform Disorders	3/26	0.00079185	0.0407011	18.7486	133.886	HTR1B;DRD2;CPLX1
Greenyellow	DisGeNET.40	Spasmodic torticollis	3/26	0.00079185	0.0407011	18.7486	133.886	PNKD;HPCA;DRD2
Greenyellow	DisGeNET.41	Epileptic Seizures	5/103	0.00081621	0.0407679	7.41334	52.7151	ADORA2A;HTR1B;DRD1;PDYN;DRD2
Greenyellow	DisGeNET.42	Myoclonic Seizures	6/156	0.000843518	0.0407679	5.8397	41.333	ADORA2A;HTR1B;DRD1;PDYN;DRD2;CPLX1
Greenyellow	DisGeNET.43	Tonic Seizures	5/104	0.000852636	0.0407679	7.33809	51.8596	ADORA2A;HTR1B;DRD1;PDYN;DRD2
Greenyellow	DisGeNET.44	Marijuana Abuse	4/62	0.000961785	0.0449416	9.96778	69.2434	PENK;RGS20;PDYN;DRD2
Greenyellow	DisGeNET.45	Intermittent Explosive Disorder	2/7	0.00101261	0.0462652	57.1338	393.95	HTR1B;DRD2
Greenyellow	DisGeNET.46	Convulsive Seizures	5/109	0.00105323	0.0470747	6.98353	47.8783	ADORA2A;HTR1B;DRD1;PDYN;DRD2
Greenyellow	DisGeNET.47	Torticollis	3/29	0.00109579	0.0479351	16.5828	113.033	PNKD;HPCA;DRD2
Grey60	WikiPathways_2019_Human.1	Oligodendrocyte Specification and differentiation(including remyelination), leading to Myelin Components for CNS WP4304	7/30	2.1814e-08	2.57406e-06	29.4889	520.205	MAG;CNP;MOG;PLP1;MBP;OLIG1;NKX2-2
Grey60	WikiPathways_2019_Human.2	Glial Cell Differentiation WP2276	4/7	4.11067e-07	2.4253e-05	127.446	1874.03	MAG;CNP;PLP1;MBP
Grey60	DisGeNET.1	Demyelinating Diseases	10/85	2.16814e-08	5.93421e-05	13.0773	230.772	GJC2;CNP;MOG;PLP1;PMP22;MBP;CRYAB;NDRG1;KLK6;NKX2-2
Grey60	DisGeNET.2	Leukodystrophy	13/204	2.72433e-07	0.000372824	6.73684	101.833	HSD17B4;OLIG1;GFAP;CYP27A1;SPART;FA2H;MAG;GJC2;GJB1;PSAT1;PLP1;PHGDH;ASPA
Grey60	GO_Biological_Process_2018.1	myelination (GO:0042552)	6/37	2.27226e-06	0.00236769	18.6543	242.408	PLLP;PLP1;MAL;MBP;SIRT2;KLK6
Grey60	DisGeNET.3	Neurodegenerative Disorders	23/745	4.2426e-06	0.00387066	3.23084	39.9665	GSTM2;GSN;MOG;SERPINF1;SIRT2;KLK6;GFAP;CYP27A1;DNAJB2;FA2H;CLN3;FTH1;NCL;MRC1;PLP1;PADI2;SNCG;APOD;MBP;FBXO7;CRYAB;ASPA;NFE2L2
Grey60	DisGeNET.4	Inherited neuropathies	6/45	7.42101e-06	0.00438508	14.8218	175.063	DNAJB2;GJB1;LPAR1;PMP22;LITAF;NDRG1
Grey60	DisGeNET.5	Pelizaeus-Merzbacher Disease	5/27	8.3282e-06	0.00438508	21.8083	255.066	MAG;GJC2;PLP1;PMP22;MBP
Grey60	DisGeNET.6	Peripheral demyelinating neuropathy	6/47	9.61289e-06	0.00438508	14.0973	162.858	MAG;GJB1;PLP1;PMP22;LITAF;NDRG1
Grey60	DisGeNET.7	Shy-Drager Syndrome	7/75	1.42339e-05	0.00513271	9.95149	111.057	CNP;PLP1;MBP;FBXO7;CRYAB;SIRT2;GFAP
Grey60	DisGeNET.8	Hereditary liability to pressure palsies	4/15	1.50024e-05	0.00513271	34.744	385.912	GJB1;PMP22;MBP;LITAF
Grey60	DisGeNET.9	Protein Deficiency	7/83	2.77291e-05	0.00843272	8.90035	93.3916	C4A;ELOVL1;MRC1;PLP1;HSD17B4;ABHD5;HADH
Grey60	GO_Biological_Process_2018.2	sphingolipid metabolic process (GO:0006665)	8/116	3.21901e-05	0.0100919	7.18154	74.2847	GLTP;FA2H;ELOVL1;CLN3;ALDH3B1;DEGS1;PLPP2;CERS2
Grey60	GO_Biological_Process_2018.3	membrane lipid biosynthetic process (GO:0046467)	6/60	3.99938e-05	0.0100919	10.6965	108.321	ELOVL1;FA2H;ALDH3B1;DEGS1;PLPP2;CERS2
Grey60	GO_Biological_Process_2018.4	neutrophil degranulation (GO:0043312)	16/479	5.21334e-05	0.0100919	3.42489	33.7752	PYGB;SERPINB1;TMEM63A;GSN;TNFAIP6;RHOG;MAGT1;LAMP1;RAB37;FTH1;ALDH3B1;TMBIM1;PADI2;DEGS1;METTL7A;GOLGA7
Grey60	GO_Biological_Process_2018.5	neutrophil activation involved in immune response (GO:0002283)	16/483	5.7512e-05	0.0100919	3.39485	33.1457	PYGB;SERPINB1;TMEM63A;GSN;TNFAIP6;RHOG;MAGT1;LAMP1;RAB37;FTH1;ALDH3B1;TMBIM1;PADI2;DEGS1;METTL7A;GOLGA7
Grey60	GO_Biological_Process_2018.6	neutrophil mediated immunity (GO:0002446)	16/487	6.33737e-05	0.0100919	3.36532	32.5308	PYGB;SERPINB1;TMEM63A;GSN;TNFAIP6;RHOG;MAGT1;LAMP1;RAB37;FTH1;ALDH3B1;TMBIM1;PADI2;DEGS1;METTL7A;GOLGA7
Grey60	GO_Biological_Process_2018.7	sphingolipid biosynthetic process (GO:0030148)	6/66	6.88703e-05	0.0100919	9.6239	92.2286	ELOVL1;FA2H;ALDH3B1;DEGS1;PLPP2;CERS2
Grey60	GO_Biological_Process_2018.8	substantia nigra development (GO:0021762)	5/43	8.65828e-05	0.0100919	12.6156	118.012	CNP;PLP1;PADI2;MBP;SIRT2
Grey60	GO_Biological_Process_2018.9	negative regulation of response to reactive oxygen species (GO:1901032)	3/9	9.279e-05	0.0100919	47.5553	441.559	GPR37;GPR37L1;NFE2L2
Grey60	GO_Biological_Process_2018.10	unsaturated fatty acid metabolic process (GO:0033559)	5/44	9.68514e-05	0.0100919	12.2915	113.602	ELOVL1;FA2H;GSTM2;HSD17B4;DEGS1
Grey60	GO_Biological_Process_2018.11	negative regulation of oxidative stress-induced cell death (GO:1903202)	4/24	0.000108406	0.010269	19.1005	174.38	GPR37;GPR37L1;FBXO7;NFE2L2
Grey60	GO_Biological_Process_2018.12	organonitrogen compound biosynthetic process (GO:1901566)	9/181	0.000134082	0.0116428	5.08154	45.3124	FA2H;ELOVL1;GSTM2;ABHD3;ALDH3B1;DEGS1;PLPP2;ASPA;CERS2
Grey60	GO_Biological_Process_2018.13	regulation of hydrogen peroxide-induced cell death (GO:1903205)	3/11	0.000179443	0.0143831	35.6629	307.615	GPR37;GPR37L1;NFE2L2
Grey60	DisGeNET.10	White matter dysmyelination/demyelination	3/8	6.2345e-05	0.0155126	57.0692	552.591	PLP1;HSD17B4;PHGDH
Grey60	DisGeNET.11	Cerebral dysmyelination	3/8	6.2345e-05	0.0155126	57.0692	552.591	PLP1;HSD17B4;PHGDH
Grey60	DisGeNET.12	Charcot-Marie-Tooth Disease	12/298	8.14372e-05	0.0158729	4.1121	38.7182	SPART;DNAJB2;MAG;GJC2;GJB1;LPAR1;PLP1;PMP22;MBP;LITAF;CRYAB;NDRG1
Grey60	DisGeNET.13	Lower limb spasticity	4/23	9.10883e-05	0.0158729	20.1068	187.067	FA2H;GJC2;PLP1;FBXO7
Grey60	DisGeNET.14	Experimental Autoimmune Encephalomyelitis	3/9	9.279e-05	0.0158729	47.5553	441.559	MOG;MBP;NFE2L2
Grey60	DisGeNET.15	Clinically Isolated Syndrome, CNS Demyelinating	3/9	9.279e-05	0.0158729	47.5553	441.559	MOG;PMP22;MBP
Grey60	DisGeNET.16	Demyelination	3/9	9.279e-05	0.0158729	47.5553	441.559	MOG;PMP22;MBP
Grey60	DisGeNET.17	Onion bulb formation	4/25	0.000127993	0.0199993	18.19	163.047	GJB1;PMP22;LITAF;NDRG1
Grey60	DisGeNET.18	Canavan Disease	3/10	0.000131527	0.0199993	40.7596	364.24	GJC2;PLP1;ASPA
Grey60	DisGeNET.19	Opisthotonus	4/26	0.00015002	0.0205901	17.3623	152.871	PSAT1;PHGDH;ASPA;CRLF1
Grey60	DisGeNET.20	Central nervous system demyelination	5/49	0.000162945	0.0205901	10.892	95.001	MAG;GJC2;GJB1;MOG;ASPA
Grey60	DisGeNET.21	Segmental peripheral demyelination/remyelination	3/11	0.000179443	0.0205901	35.6629	307.615	PMP22;LITAF;NDRG1
Grey60	DisGeNET.22	Atrophy of corpus callosum	3/11	0.000179443	0.0205901	35.6629	307.615	FA2H;MAG;HSD17B4
Grey60	DisGeNET.23	stage, prostate cancer	5/50	0.00017951	0.0205901	10.6494	91.8541	CD82;PSAT1;PROS1;APOD;NFE2L2
Grey60	DisGeNET.24	Adrenoleukodystrophy	8/149	0.000187533	0.0205901	5.49153	47.1258	ELOVL1;MAG;GJB1;MOG;PMP22;HSD17B4;MBP;HADH
Grey60	DisGeNET.25	Distal sensory impairment	6/79	0.000188071	0.0205901	7.90484	67.8132	DNAJB2;GJC2;GJB1;PMP22;LITAF;NDRG1
Grey60	DisGeNET.26	nervous system disorder	14/436	0.000231194	0.0227276	3.26146	27.3057	ELOVL1;MOG;SERPINF1;NDE1;GFAP;CYP27A1;QDPR;CLN3;GJB1;PLP1;PMP22;APOD;ASPA;NFE2L2
Grey60	DisGeNET.27	Charcot-Marie-Tooth Disease, Type Ia (disorder)	4/29	0.000232507	0.0227276	15.2765	127.812	MAG;GJB1;PMP22;LITAF
Grey60	DisGeNET.28	Phenylketonurias	4/29	0.000232507	0.0227276	15.2765	127.812	QDPR;CNP;MBP;GFAP
Grey60	GO_Biological_Process_2018.14	amyloid precursor protein metabolic process (GO:0042982)	3/13	0.000306223	0.0227917	28.5274	230.821	CLN3;LDLRAP1;KLK6
Grey60	GO_Biological_Process_2018.15	negative regulation of hydrogen peroxide-induced cell death (GO:1903206)	3/14	0.000386713	0.0268637	25.9327	203.775	GPR37;GPR37L1;NFE2L2
Grey60	DisGeNET.29	Liver Cirrhosis, Experimental	20/801	0.000331627	0.0312182	2.54848	20.4172	IL33;GSN;CNP;ARPC1B;MID1IP1;PLEKHB1;ANXA5;NDRG1;TF;DBNDD2;NAT8;LBH;IVD;TMBIM1;PLIN3;RELL1;TRIM59;PLPP2;CRYAB;NFE2L2
Grey60	DisGeNET.30	Encephalomyelitis	12/348	0.000342179	0.0312182	3.49121	27.8604	GJB1;MOG;PLP1;PADI2;MBP;OLIG1;LTBR;PTGDS;CRYAB;KLK6;GFAP;CERS2
Grey60	DisGeNET.31	Hereditary Motor and Sensory Neuropathies	4/33	0.000387584	0.0335982	13.1667	103.432	DNAJB2;GJB1;PMP22;NDRG1
Grey60	DisGeNET.32	Paraparesis, Spastic	5/59	0.000392818	0.0335982	8.87046	69.5636	SPART;FA2H;MAG;GJC2;PLP1
Grey60	DisGeNET.33	Anastomosis	4/34	0.000435658	0.0361332	12.7272	98.4915	CYP27A1;GJB1;PSAT1;PROS1
Grey60	DisGeNET.34	Peripheral Neuropathy	11/309	0.000462017	0.0363665	3.59733	27.6272	CYP27A1;MAG;GJB1;GSN;CA2;SERPINF1;PLP1;PMP22;LITAF;NDRG1;GFAP
Grey60	DisGeNET.35	Congenital pes cavus	7/130	0.000465045	0.0363665	5.48629	42.0984	SPART;GJC2;GJB1;PLP1;PMP22;HSD17B4;LITAF
Grey60	DisGeNET.36	Hammer Toe	4/36	0.000544317	0.0413832	11.9306	89.6698	SPART;GJB1;PMP22;HSD17B4
Grey60	DisGeNET.37	Severe chronic obstructive pulmonary disease	3/16	0.00058575	0.0433297	21.9408	163.297	IL33;GSTM2;MRC1
Lightgreen	KEGG_2019_Human.1	cGMP-PKG signaling pathway	7/166	1.43095e-05	0.00168852	9.87864	110.192	PPP3CB;MEF2C;GUCY1B1;ADRA1D;ATP2A1;ATP1A1;CALM1
Lightgreen	BioCarta_2016.1	NFAT and Hypertrophy of the heart Homo sapiens h nfatPathway	4/44	5.60574e-05	0.00189743	21.8297	213.694	CAMK2B;PPP3CB;MEF2C;ATP2A1
Lightgreen	BioCarta_2016.2	Regulation of PGC-1a Homo sapiens h pgc1aPathway	3/20	0.000111614	0.00189743	38.1483	347.168	CAMK2B;MEF2C;PPP3CB
Lightgreen	KEGG_2019_Human.2	Oxytocin signaling pathway	6/153	9.01385e-05	0.00531817	9.06122	84.3977	CAMK2B;PPP3CB;MEF2C;CACNB3;GUCY1B1;CALM1
Lightgreen	BioCarta_2016.3	Signal Dependent Regulation of Myogenesis by Corepressor MITR Homo sapiens h MITRPathway	2/8	0.000613586	0.00695398	71.3226	527.515	CAMK2B;MEF2C
Lightgreen	KEGG_2019_Human.3	Calcium signaling pathway	6/188	0.000276766	0.0108861	7.30572	59.8509	CAMK2B;PPP3CB;CCKBR;ADRA1D;ATP2A1;CALM1
Lightgreen	KEGG_2019_Human.4	Gastric acid secretion	4/75	0.00044858	0.0132331	12.2792	94.6657	CAMK2B;CCKBR;ATP1A1;CALM1
Lightgreen	BioCarta_2016.4	Effects of calcineurin in Keratinocyte Differentiation Homo sapiens h calcineurinPathway	2/13	0.00168303	0.0143057	38.8935	248.419	CAMK2B;PPP3CB
Lightgreen	KEGG_2019_Human.5	Adrenergic signaling in cardiomyocytes	5/145	0.000641545	0.0151405	7.84325	57.6607	CAMK2B;CACNB3;ADRA1D;ATP1A1;CALM1
Lightgreen	BioCarta_2016.5	Endocytotic role of NDK, Phosphins and Dynamin Homo sapiens h ndkDynaminPathway	2/16	0.00256537	0.0174445	30.5545	182.278	CAMK2B;PPP3CB
Lightgreen	KEGG_2019_Human.6	Salivary secretion	4/90	0.000893272	0.0175677	10.1298	71.1176	GUCY1B1;ADRA1D;ATP1A1;CALM1
Lightgreen	BioCarta_2016.6	Nitric Oxide Signaling Pathway Homo sapiens h nos1Pathway	2/19	0.00362195	0.0205244	25.1588	141.411	CAMK2B;PPP3CB
Lightgreen	BioCarta_2016.7	Control of skeletal myogenesis by HDAC and calcium/calmodulin-dependent kinase (CaMK) Homo sapiens h hdacPathway	2/21	0.00442064	0.0214717	22.5082	122.028	CAMK2B;MEF2C
Lightgreen	Reactome_2016.1	Ion homeostasis Homo sapiens R-HSA-5578775	4/51	0.000100606	0.0274036	18.5719	170.941	CAMK2B;ATP2A1;ATP1A1;CALM1
Lightgreen	Reactome_2016.2	Ion transport by P-type ATPases Homo sapiens R-HSA-936837	4/55	0.000135326	0.0274036	17.1118	152.429	CAMK2B;ATP2A1;ATP1A1;CALM1
Lightgreen	BioCarta_2016.8	Signaling Pathway from G-Protein Families Homo sapiens h gpcrPathway	2/26	0.00673686	0.0286317	17.8145	89.0754	CAMK2B;PPP3CB
Lightgreen	BioCarta_2016.9	Role of MEF2D in T-cell Apoptosis Homo sapiens h mef2dPathway	2/30	0.00890674	0.0293382	15.2665	72.0724	CAMK2B;PPP3CB
Lightgreen	BioCarta_2016.10	fMLP induced chemokine gene expression in HMC-1 cells Homo sapiens h fMLPpathway	2/30	0.00890674	0.0293382	15.2665	72.0724	CAMK2B;PPP3CB
Lightgreen	BioCarta_2016.11	BCR Signaling Pathway Homo sapiens h bcrPathway	2/31	0.00949178	0.0293382	14.7393	68.646	CAMK2B;PPP3CB
Lightgreen	BioCarta_2016.12	Angiotensin II mediated activation of JNK Pathway via Pyk2 dependent signaling Homo sapiens h At1rPathway	2/34	0.0113463	0.0321479	13.3555	59.8175	CAMK2B;MEF2C
Lightgreen	DisGeNET.1	Congenital Disorders of Glycosylation	5/122	0.000290804	0.0344455	9.39601	76.5104	EXT1;FKRP;CHSY1;SLC35C1;LARGE1
Lightgreen	DisGeNET.2	Depressed philtrum	3/28	0.000312031	0.0344455	25.9304	209.321	EFTUD2;EXT1;CHSY1
Lightgreen	DisGeNET.3	MUSCULAR DYSTROPHY-DYSTROGLYCANOPATHY (CONGENITAL WITH BRAIN AND EYE ANOMALIES), TYPE A, 10	2/6	0.00033075	0.0344455	106.995	857.471	FKRP;LARGE1
Lightgreen	DisGeNET.4	MUSCULAR DYSTROPHY-DYSTROGLYCANOPATHY (CONGENITAL WITH BRAIN AND EYE ANOMALIES), TYPE A, 11	2/6	0.00033075	0.0344455	106.995	857.471	FKRP;LARGE1
Lightgreen	DisGeNET.5	MUSCULAR DYSTROPHY-DYSTROGLYCANOPATHY (CONGENITAL WITH BRAIN AND EYE ANOMALIES), TYPE A, 12	2/6	0.00033075	0.0344455	106.995	857.471	FKRP;LARGE1
Lightgreen	DisGeNET.6	MUSCULAR DYSTROPHY-DYSTROGLYCANOPATHY (CONGENITAL WITH BRAIN AND EYE ANOMALIES), TYPE A, 14	2/6	0.00033075	0.0344455	106.995	857.471	FKRP;LARGE1
Lightgreen	DisGeNET.7	MUSCULAR DYSTROPHY-DYSTROGLYCANOPATHY (CONGENITAL WITH BRAIN AND EYE ANOMALIES), TYPE A, 2	2/6	0.00033075	0.0344455	106.995	857.471	FKRP;LARGE1
Lightgreen	DisGeNET.8	MUSCULAR DYSTROPHY-DYSTROGLYCANOPATHY (CONGENITAL WITH BRAIN AND EYE ANOMALIES), TYPE A, 8	2/6	0.00033075	0.0344455	106.995	857.471	FKRP;LARGE1
Lightgreen	DisGeNET.9	MUSCULAR DYSTROPHY-DYSTROGLYCANOPATHY (CONGENITAL WITH MENTAL RETARDATION), TYPE B, 1	2/6	0.00033075	0.0344455	106.995	857.471	FKRP;LARGE1
Lightgreen	DisGeNET.10	MUSCULAR DYSTROPHY-DYSTROGLYCANOPATHY (CONGENITAL WITH MENTAL RETARDATION), TYPE B, 14	2/6	0.00033075	0.0344455	106.995	857.471	FKRP;LARGE1
Lightgreen	DisGeNET.11	MUSCULAR DYSTROPHY-DYSTROGLYCANOPATHY (CONGENITAL WITH MENTAL RETARDATION), TYPE B, 2	2/6	0.00033075	0.0344455	106.995	857.471	FKRP;LARGE1
Lightgreen	DisGeNET.12	MUSCULAR DYSTROPHY-DYSTROGLYCANOPATHY (CONGENITAL WITH MENTAL RETARDATION), TYPE B, 3	2/6	0.00033075	0.0344455	106.995	857.471	FKRP;LARGE1
Lightgreen	DisGeNET.13	MUSCULAR DYSTROPHY-DYSTROGLYCANOPATHY (LIMB-GIRDLE), TYPE C, 12	2/6	0.00033075	0.0344455	106.995	857.471	FKRP;LARGE1
Lightgreen	DisGeNET.14	Meningoencephalocele	2/6	0.00033075	0.0344455	106.995	857.471	FKRP;LARGE1
Lightgreen	DisGeNET.15	Central Core Myopathy (disorder)	3/29	0.00034684	0.0344455	24.9319	198.623	FKRP;ATP2A1;LARGE1
Lightgreen	DisGeNET.16	Deep philtrum	3/29	0.00034684	0.0344455	24.9319	198.623	EFTUD2;EXT1;CHSY1
Lightgreen	Reactome_2016.3	Signalling by NGF Homo sapiens R-HSA-166520	9/450	0.000289901	0.0375349	4.61889	37.6253	CAMK2B;NET1;MEF2C;PLEKHG5;PSME3;PIP5K1A;CALM1;MARK3;DUSP7
Lightgreen	Reactome_2016.4	Innate Immune System Homo sapiens R-HSA-168249	12/807	0.000433771	0.0375349	3.47534	26.9095	CAMK2B;PPP3CB;MEF2C;PSME3;ELMO2;PIP5K1A;WASF1;CALM1;MARK3;TRIM32;SIRPB1;DUSP7
Lightgreen	Reactome_2016.5	Cardiac conduction Homo sapiens R-HSA-5576891	5/135	0.000463394	0.0375349	8.45085	64.8766	CAMK2B;CACNB3;ATP2A1;ATP1A1;CALM1
Lightgreen	DisGeNET.17	MUSCULAR DYSTROPHY-DYSTROGLYCANOPATHY (CONGENITAL WITH BRAIN AND EYE ANOMALIES), TYPE A, 7	2/7	0.000461617	0.0389703	85.5914	657.408	FKRP;LARGE1
Lightgreen	DisGeNET.18	MUSCULAR DYSTROPHY-DYSTROGLYCANOPATHY (LIMB-GIRDLE), TYPE C, 7	2/7	0.000461617	0.0389703	85.5914	657.408	FKRP;LARGE1
Lightgreen	DisGeNET.19	Cannabis Dependence	3/32	0.000465976	0.0389703	22.3493	171.45	CAMK2B;FAAH;CALM1
Lightgreen	DisGeNET.20	Phencyclidine-Related Disorders	2/8	0.000613586	0.0458021	71.3226	527.515	CAMK2B;CALM1
Lightgreen	DisGeNET.21	Phencyclidine Abuse	2/8	0.000613586	0.0458021	71.3226	527.515	CAMK2B;CALM1
Lightgreen	DisGeNET.22	Hypoplastic male external genitalia	2/9	0.000786457	0.0458021	61.1306	436.96	FKRP;LARGE1
Lightgreen	DisGeNET.23	Accessory oral frenulum	2/9	0.000786457	0.0458021	61.1306	436.96	EFTUD2;TCTN3
Lightgreen	DisGeNET.24	Myotubular (centronuclear) myopathy	2/9	0.000786457	0.0458021	61.1306	436.96	FKRP;LARGE1
Lightgreen	DisGeNET.25	Facial muscle weakness of muscles innervated by CN VII	4/88	0.000821117	0.0458021	10.3721	73.6919	FKRP;PLXND1;LARGE1;TRIM32
Lightgreen	DisGeNET.26	Absent auditory canals	3/39	0.000838185	0.0458021	17.9973	127.498	EFTUD2;FKRP;LARGE1
Lightgreen	DisGeNET.27	Absent external auditory canals	3/39	0.000838185	0.0458021	17.9973	127.498	EFTUD2;FKRP;LARGE1
Lightgreen	DisGeNET.28	Atresia of the external auditory canal	3/39	0.000838185	0.0458021	17.9973	127.498	EFTUD2;FKRP;LARGE1
Lightgreen	DisGeNET.29	Atretic auditory canal	3/39	0.000838185	0.0458021	17.9973	127.498	EFTUD2;FKRP;LARGE1
Lightgreen	DisGeNET.30	Syncope	3/40	0.000903041	0.0458021	17.51	122.741	GPD1L;CALM1;TRPM4
Lightgreen	DisGeNET.31	Facial Paresis	4/92	0.000969785	0.0458021	9.8986	68.6808	FKRP;PLXND1;LARGE1;TRIM32
Lightgreen	DisGeNET.32	Bell Palsy	4/92	0.000969785	0.0458021	9.8986	68.6808	FKRP;PLXND1;LARGE1;TRIM32
Lightgreen	DisGeNET.33	Shoulder girdle muscle atrophy	2/10	0.000980033	0.0458021	53.4866	370.551	FKRP;TRIM32
Lightgreen	DisGeNET.34	Thick cerebral cortex	2/10	0.000980033	0.0458021	53.4866	370.551	FKRP;LARGE1
Lightgreen	DisGeNET.35	EMG: myopathic abnormalities	3/42	0.00104211	0.0473117	16.6104	114.055	FKRP;LARGE1;TRIM32
Lightgreen	DisGeNET.36	Right bundle branch block	2/11	0.00119412	0.0474363	47.5412	319.969	GPD1L;TRPM4
Lightgreen	DisGeNET.37	Hashish Abuse	2/11	0.00119412	0.0474363	47.5412	319.969	CAMK2B;CALM1
Lightgreen	DisGeNET.38	Isaacs syndrome	2/11	0.00119412	0.0474363	47.5412	319.969	LGI1;ATP2A1
Lightgreen	DisGeNET.39	Cannabis-Related Disorder	2/11	0.00119412	0.0474363	47.5412	319.969	CAMK2B;CALM1
Lightgreen	DisGeNET.40	Posterior fossa cyst	2/11	0.00119412	0.0474363	47.5412	319.969	FKRP;LARGE1
Lightgreen	Reactome_2016.6	VEGFA-VEGFR2 Pathway Homo sapiens R-HSA-4420097	7/320	0.000834204	0.0483617	4.97909	35.2969	CAMK2B;PSME3;ELMO2;WASF1;CALM1;MARK3;DUSP7
Lightgreen	Reactome_2016.7	Signaling by VEGF Homo sapiens R-HSA-194138	7/328	0.000963269	0.0483617	4.85302	33.7051	CAMK2B;PSME3;ELMO2;WASF1;CALM1;MARK3;DUSP7
Lightgreen	Reactome_2016.8	Gastrin-CREB signalling pathway via PKC and MAPK Homo sapiens R-HSA-881907	8/432	0.00104815	0.0483617	4.2249	28.9859	CAMK2B;CCKBR;LPAR5;PSME3;ADRA1D;CALM1;MARK3;DUSP7
Lightgreen	Reactome_2016.9	Phase 0 - rapid depolarisation Homo sapiens R-HSA-5576892	3/44	0.00119402	0.0483617	15.7985	106.331	CAMK2B;CACNB3;CALM1
Lightgreen	Reactome_2016.10	CLEC7A (Dectin-1) induces NFAT activation Homo sapiens R-HSA-5607763	2/11	0.00119412	0.0483617	47.5412	319.969	PPP3CB;CALM1
Lightgreen	Reactome_2016.11	Reduction of cytosolic Ca++ levels Homo sapiens R-HSA-418359	2/12	0.00142851	0.0486485	42.7849	280.289	ATP2A1;CALM1
Lightgreen	Reactome_2016.12	DAP12 interactions Homo sapiens R-HSA-2172127	7/359	0.00161897	0.0486485	4.41861	28.3939	CAMK2B;PSME3;PIP5K1A;CALM1;MARK3;SIRPB1;DUSP7
Lightgreen	Reactome_2016.13	NCAM signaling for neurite out-growth Homo sapiens R-HSA-375165	6/266	0.00169267	0.0486485	5.09378	32.5057	CAMK2B;CACNB3;PSME3;CALM1;MARK3;DUSP7
Lightgreen	Reactome_2016.14	NGF signalling via TRKA from the plasma membrane Homo sapiens R-HSA-187037	7/374	0.00204088	0.0486485	4.23477	26.2317	CAMK2B;MEF2C;PSME3;PIP5K1A;CALM1;MARK3;DUSP7
Lightgreen	Reactome_2016.15	CREB phosphorylation through the activation of CaMKII Homo sapiens R-HSA-442729	2/15	0.00225165	0.0486485	32.9065	200.601	CAMK2B;CALM1
Lightgreen	Reactome_2016.16	Muscle contraction Homo sapiens R-HSA-397014	5/196	0.00243996	0.0486485	5.73415	34.4953	CAMK2B;CACNB3;ATP2A1;ATP1A1;CALM1
Lightgreen	Reactome_2016.17	Fc epsilon receptor (FCERI) signaling Homo sapiens R-HSA-2454202	7/395	0.0027694	0.0486485	4.00126	23.5639	CAMK2B;PPP3CB;PSME3;PIP5K1A;CALM1;MARK3;DUSP7
Lightgreen	Reactome_2016.18	Ion channel transport Homo sapiens R-HSA-983712	5/203	0.00283858	0.0486485	5.52946	32.4273	CAMK2B;ATP2A1;ATP1A1;CALM1;TRPM4
Lightgreen	Reactome_2016.19	Ras activation uopn Ca2+ infux through NMDA receptor Homo sapiens R-HSA-442982	2/17	0.00289846	0.0486485	28.5161	166.636	CAMK2B;CALM1
Lightgreen	Reactome_2016.20	Developmental Biology Homo sapiens R-HSA-1266738	10/786	0.00412811	0.0486485	2.90009	15.9213	CAMK2B;LGI1;MEF2C;CACNB3;PLXND1;PSME3;CALM1;MED26;MARK3;DUSP7
Lightgreen	Reactome_2016.21	ERK/MAPK targets Homo sapiens R-HSA-198753	2/21	0.00442064	0.0486485	22.5082	122.028	MEF2C;DUSP7
Lightgreen	Reactome_2016.22	Signaling by SCF-KIT Homo sapiens R-HSA-1433557	6/325	0.0045549	0.0486485	4.1392	22.3167	CAMK2B;PSME3;PIP5K1A;CALM1;MARK3;DUSP7
Lightgreen	Reactome_2016.23	Downstream signaling of activated FGFR2 Homo sapiens R-HSA-5654696	6/329	0.0048313	0.0486485	4.0871	21.7951	CAMK2B;PSME3;PIP5K1A;CALM1;MARK3;DUSP7
Lightgreen	Reactome_2016.24	Downstream signaling of activated FGFR4 Homo sapiens R-HSA-5654716	6/329	0.0048313	0.0486485	4.0871	21.7951	CAMK2B;PSME3;PIP5K1A;CALM1;MARK3;DUSP7
Lightgreen	Reactome_2016.25	Downstream signaling of activated FGFR3 Homo sapiens R-HSA-5654708	6/329	0.0048313	0.0486485	4.0871	21.7951	CAMK2B;PSME3;PIP5K1A;CALM1;MARK3;DUSP7
Lightgreen	Reactome_2016.26	Signaling by ERBB4 Homo sapiens R-HSA-1236394	6/330	0.00490229	0.0486485	4.07428	21.6672	CAMK2B;PSME3;PIP5K1A;CALM1;MARK3;DUSP7
Lightgreen	Reactome_2016.27	Signaling by FGFR4 Homo sapiens R-HSA-5654743	6/332	0.00504657	0.0486485	4.04887	21.4147	CAMK2B;PSME3;PIP5K1A;CALM1;MARK3;DUSP7
Lightgreen	Reactome_2016.28	Downstream signaling of activated FGFR1 Homo sapiens R-HSA-5654687	6/332	0.00504657	0.0486485	4.04887	21.4147	CAMK2B;PSME3;PIP5K1A;CALM1;MARK3;DUSP7
Lightgreen	Reactome_2016.29	Signaling by FGFR3 Homo sapiens R-HSA-5654741	6/333	0.00511987	0.0486485	4.03628	21.2899	CAMK2B;PSME3;PIP5K1A;CALM1;MARK3;DUSP7
Lightgreen	Reactome_2016.30	GRB2 events in EGFR signaling Homo sapiens R-HSA-179812	5/235	0.00527887	0.0486485	4.75242	24.9219	CAMK2B;PSME3;CALM1;MARK3;DUSP7
Lightgreen	Reactome_2016.31	SHC1 events in EGFR signaling Homo sapiens R-HSA-180336	5/235	0.00527887	0.0486485	4.75242	24.9219	CAMK2B;PSME3;CALM1;MARK3;DUSP7
Lightgreen	Reactome_2016.32	SOS-mediated signalling Homo sapiens R-HSA-112412	5/235	0.00527887	0.0486485	4.75242	24.9219	CAMK2B;PSME3;CALM1;MARK3;DUSP7
Lightgreen	Reactome_2016.33	SHC1 events in ERBB4 signaling Homo sapiens R-HSA-1250347	5/235	0.00527887	0.0486485	4.75242	24.9219	CAMK2B;PSME3;CALM1;MARK3;DUSP7
Lightgreen	Reactome_2016.34	RAF/MAP kinase cascade Homo sapiens R-HSA-5673001	5/235	0.00527887	0.0486485	4.75242	24.9219	CAMK2B;PSME3;CALM1;MARK3;DUSP7
Lightgreen	Reactome_2016.35	Signaling by FGFR1 Homo sapiens R-HSA-5654736	6/336	0.00534448	0.0486485	3.99898	20.9214	CAMK2B;PSME3;PIP5K1A;CALM1;MARK3;DUSP7
Lightgreen	Reactome_2016.36	FRS-mediated FGFR2 signaling Homo sapiens R-HSA-5654700	5/236	0.00537326	0.0486485	4.7316	24.7289	CAMK2B;PSME3;CALM1;MARK3;DUSP7
Lightgreen	Reactome_2016.37	FRS-mediated FGFR4 signaling Homo sapiens R-HSA-5654712	5/236	0.00537326	0.0486485	4.7316	24.7289	CAMK2B;PSME3;CALM1;MARK3;DUSP7
Lightgreen	Reactome_2016.38	FRS-mediated FGFR3 signaling Homo sapiens R-HSA-5654706	5/236	0.00537326	0.0486485	4.7316	24.7289	CAMK2B;PSME3;CALM1;MARK3;DUSP7
Lightgreen	Reactome_2016.39	FRS-mediated FGFR1 signaling Homo sapiens R-HSA-5654693	5/236	0.00537326	0.0486485	4.7316	24.7289	CAMK2B;PSME3;CALM1;MARK3;DUSP7
Lightgreen	Reactome_2016.40	G alpha (12/13) signalling events Homo sapiens R-HSA-416482	3/75	0.0054757	0.0486485	8.98234	46.7749	NET1;PLEKHG5;ADRA1D
Lightgreen	Reactome_2016.41	ARMS-mediated activation Homo sapiens R-HSA-170984	5/239	0.00566361	0.0486485	4.67023	24.1623	CAMK2B;PSME3;CALM1;MARK3;DUSP7
Lightgreen	Reactome_2016.42	Signalling to p38 via RIT and RIN Homo sapiens R-HSA-187706	5/239	0.00566361	0.0486485	4.67023	24.1623	CAMK2B;PSME3;CALM1;MARK3;DUSP7
Lightgreen	Reactome_2016.43	Downstream signal transduction Homo sapiens R-HSA-186763	6/341	0.0057348	0.0486485	3.93829	20.3263	CAMK2B;PSME3;PIP5K1A;CALM1;MARK3;DUSP7
Lightgreen	Reactome_2016.44	DARPP-32 events Homo sapiens R-HSA-180024	2/24	0.0057565	0.0486485	19.436	100.24	PPP3CB;CALM1
Lightgreen	Reactome_2016.45	Nuclear Events (kinase and transcription factor activation) Homo sapiens R-HSA-198725	2/24	0.0057565	0.0486485	19.436	100.24	MEF2C;DUSP7
Lightgreen	Reactome_2016.46	Frs2-mediated activation Homo sapiens R-HSA-170968	5/240	0.00576281	0.0486485	4.65012	23.9775	CAMK2B;PSME3;CALM1;MARK3;DUSP7
Lightgreen	Reactome_2016.47	MAPK1/MAPK3 signaling Homo sapiens R-HSA-5684996	5/241	0.00586323	0.0486485	4.63018	23.7947	CAMK2B;PSME3;CALM1;MARK3;DUSP7
Lightgreen	Reactome_2016.48	Prolonged ERK activation events Homo sapiens R-HSA-169893	5/242	0.00596488	0.0486485	4.61041	23.6139	CAMK2B;PSME3;CALM1;MARK3;DUSP7
Lightgreen	Reactome_2016.49	DAP12 signaling Homo sapiens R-HSA-2424491	6/344	0.00597879	0.0486485	3.90273	19.9802	CAMK2B;PSME3;PIP5K1A;CALM1;MARK3;DUSP7
Lightgreen	Reactome_2016.50	Signaling by Leptin Homo sapiens R-HSA-2586552	5/243	0.00606777	0.0486485	4.5908	23.435	CAMK2B;PSME3;CALM1;MARK3;DUSP7
Lightgreen	Reactome_2016.51	Immune System Homo sapiens R-HSA-168256	15/1547	0.0061261	0.0486485	2.24865	11.4573	CAMK2B;RAP1GAP2;MEF2C;HGF;SIRPB1;DUSP7;RNF144B;PPP3CB;PSME3;ELMO2;PIP5K1A;WASF1;CALM1;MARK3;TRIM32
Lightgreen	Reactome_2016.52	Interleukin receptor SHC signaling Homo sapiens R-HSA-912526	5/245	0.00627729	0.0487829	4.55208	23.0828	CAMK2B;PSME3;CALM1;MARK3;DUSP7
Lightgreen	Reactome_2016.53	Signalling to RAS Homo sapiens R-HSA-167044	5/246	0.00638394	0.0487829	4.53296	22.9095	CAMK2B;PSME3;CALM1;MARK3;DUSP7
Lightgreen	Reactome_2016.54	VEGFR2 mediated cell proliferation Homo sapiens R-HSA-5218921	5/248	0.00660105	0.0495079	4.4952	22.5683	CAMK2B;PSME3;CALM1;MARK3;DUSP7
Lightgreen	Reactome_2016.55	Signaling by EGFR Homo sapiens R-HSA-177929	6/355	0.00693866	0.0497906	3.7776	18.7771	CAMK2B;PSME3;PIP5K1A;CALM1;MARK3;DUSP7
Lightgreen	Reactome_2016.56	Interleukin-2 signaling Homo sapiens R-HSA-451927	5/252	0.00705075	0.0497906	4.4215	21.9069	CAMK2B;PSME3;CALM1;MARK3;DUSP7
Lightgreen	Reactome_2016.57	Signalling to ERKs Homo sapiens R-HSA-187687	5/253	0.00716644	0.0497906	4.40345	21.7458	CAMK2B;PSME3;CALM1;MARK3;DUSP7
Lightgreen	Reactome_2016.58	CREB phosphorylation through the activation of Ras Homo sapiens R-HSA-442742	2/27	0.00725345	0.0497906	17.1011	84.2447	CAMK2B;CALM1
Lightgreen	Reactome_2016.59	Platelet calcium homeostasis Homo sapiens R-HSA-418360	2/27	0.00725345	0.0497906	17.1011	84.2447	ATP2A1;CALM1
Pink	WikiPathways_2019_Human.1	Hypothesized Pathways in Pathogenesis of Cardiovascular Disease WP3668	4/25	5.80208e-05	0.00522501	22.4569	219.061	TGFBR3;POSTN;SHC1;TGFBR2
Pink	WikiPathways_2019_Human.2	Epithelial to mesenchymal transition in colorectal cancer WP4239	8/159	7.15755e-05	0.00522501	6.35665	60.6727	NOTCH2;SHC1;FZD4;FZD7;FZD6;LRP5;COL4A5;TGFBR2
Pink	Reactome_2016.1	Non-integrin membrane-ECM interactions Homo sapiens R-HSA-3000171	5/42	2.91789e-05	0.00615452	16.0147	167.227	LAMA5;LAMB2;NTN4;HSPG2;DDR2
Pink	Reactome_2016.2	RNF mutants show enhanced WNT signaling and proliferation Homo sapiens R-HSA-5340588	3/8	3.39092e-05	0.00615452	70.3775	724.313	FZD4;FZD6;LRP5
Pink	WikiPathways_2019_Human.3	Wnt Signaling in Kidney Disease WP4150	4/36	0.000250981	0.0122144	14.7292	122.107	FZD4;FZD7;FZD6;LRP5
Pink	Reactome_2016.3	NF-kB activation through FADD/RIP-1 pathway mediated by caspase-8 and -10 Homo sapiens R-HSA-933543	3/12	0.000129879	0.0157154	39.0907	349.819	IFIH1;DDX58;RIPK1
Pink	Reactome_2016.4	Extracellular matrix organization Homo sapiens R-HSA-1474244	10/283	0.0001756	0.0159357	4.42161	38.235	CAST;LAMA5;COL14A1;LAMB2;LOXL3;NTN4;COL4A5;COL6A5;HSPG2;DDR2
Pink	KEGG_2019_Human.1	Breast cancer	7/147	0.000285638	0.0207783	5.96606	48.6877	NOTCH2;SHC1;FZD4;FZD7;FZD6;HEY2;LRP5
Pink	KEGG_2019_Human.2	Gastric cancer	7/149	0.000310124	0.0207783	5.88143	47.5134	SHC1;FZD4;FZD7;FZD6;LRP5;CTNNA1;TGFBR2
Pink	KEGG_2019_Human.3	ECM-receptor interaction	5/82	0.000709686	0.0316993	7.67984	55.6841	LAMA5;LAMB2;COL4A5;COL6A5;HSPG2
Skyblue	DisGeNET.1	Congenital Myasthenic Syndromes, Presynaptic	5/21	1.41344e-09	1.28793e-06	141.584	2885.09	SLC5A7;SYT2;CHAT;VAMP1;SLC18A3
Skyblue	DisGeNET.2	Myasthenic Syndromes, Congenital	6/48	1.78755e-09	1.28793e-06	66.1429	1332.28	NTRK1;SLC5A7;SYT2;CHAT;VAMP1;SLC18A3
Skyblue	Reactome_2016.1	Neurotransmitter Release Cycle Homo sapiens R-HSA-112310	4/51	7.2994e-06	0.000990652	37.6435	445.237	SLC5A7;GAD1;CHAT;SLC18A3
Skyblue	Reactome_2016.2	Acetylcholine Neurotransmitter Release Cycle Homo sapiens R-HSA-264642	3/17	9.17271e-06	0.000990652	92.8742	1077.27	SLC5A7;CHAT;SLC18A3
Skyblue	DisGeNET.3	Myasthenic Syndromes, Congenital, Slow Channel	3/19	1.30261e-05	0.00625689	81.2568	914.021	SLC5A7;SYT2;SLC18A3
Skyblue	DisGeNET.4	Congenital Myasthenic Syndromes, Postsynaptic	3/23	2.36438e-05	0.00851768	64.9924	692.326	SLC5A7;SYT2;SLC18A3
Skyblue	DisGeNET.5	Cataplexy	3/32	6.52e-05	0.0187907	44.8021	431.805	SLC5A7;CHAT;SLC18A3
Skyblue	Reactome_2016.3	Neurotoxicity of clostridium toxins Homo sapiens R-HSA-168799	2/10	0.000261308	0.0188142	106.08	875.138	SYT2;VAMP1
Skyblue	DisGeNET.6	Maculopapular eruption	2/8	0.000163101	0.0391714	141.454	1233.64	SYT2;EPHB1
Skyblue	Reactome_2016.4	Neuronal System Homo sapiens R-HSA-112316	5/301	0.000828308	0.0447286	7.54568	53.5451	SLC5A7;KCNG4;GAD1;CHAT;SLC18A3
Skyblue	WikiPathways_2019_Human.1	Biogenic Amine Synthesis WP550	2/15	0.000604968	0.0447676	65.2635	483.624	GAD1;CHAT
Turquoise	KEGG_2019_Human.1	Ribosome	114/153	9.51382e-92	2.53068e-89	35.7789	7498.73	RPL4;RPL5;RPL30;RPL3;RPL32;RPL31;RPL34;RPL8;RPL10A;RPL9;RPL6;RPL7;RPS15;RPS14;RPS17;RPS16;RPS19;RPL18A;RPL36AL;RPS18;RPL36;RPL35;RPL38;RPL37;RPS11;RPL39;RPS13;RPS12;RPS9;RPL21;RPS7;RPS8;RPL23;RPS5;RPL22;RPS6;RPSA;MRPS18C;RPL24;RPL27;RPL26;RPL29;RPL28;UBA52;MRPL18;MRPL16;MRPL14;MRPL15;MRPL12;MRPL13;MRPL11;MRPL20;RPL41;MRPL27;MRPL28;MRPL23;MRPL24;MRPL21;MRPL22;RPS26;MRPL30;RPS25;RPS28;RPS27;RPS29;R…
Turquoise	Reactome_2016.1	SRP-dependent cotranslational protein targeting to membrane Homo sapiens R-HSA-1799339	91/107	3.54275e-83	3.69509e-80	68.6498	13033.1	RPL4;RPL5;SRP19;RPL30;RPL3;RPL32;RPL31;RPL34;RPLP1;RPLP0;SRP14;RPL8;RPL10A;RPL9;RPL6;RPL7;RPS15;RPS4X;RPS14;RPL7A;RPS17;RPS16;RPS19;RPL18A;RPS18;SEC61G;RPL36;RPL35;RPLP2;RPL38;RPL37;SEC61B;RPS11;RPL39;RPS13;RPS12;RPS9;RPL21;RPS7;SSR4;RPS8;RPL23;RPS5;SSR2;RPL22;RPS6;RPL13A;RPSA;RPS3A;SRP9;RPL37A;RPL24;RPL27;RPL26;RPL29;RPL28;UBA52;RPL10;RPL12;RPN1;RPL11;RPL36A;RPS15A;RPL14;RPS3;RPL13;RPL15;RPS2;RP…
Turquoise	GO_Biological_Process_2018.1	translation (GO:0006412)	132/232	5.16562e-83	1.55072e-79	16.299	3088.22	RPL4;N6AMT1;RPL5;RPL30;RPL3;RPL32;RPL31;RPL34;RPL8;RPL10A;RPL9;RPL6;RPL7;RPS15;EEF1B2;RPS14;RPS17;MTRF1;RPS16;RPS19;RPL18A;RPS18;RPL36;RPL35;RPL38;RPL37;RPS11;RPL39;RPS13;RPS9;RPL21;RPS7;RPS8;RPL23;RPS5;RPL22;RPS6;RPSA;MRPS18C;EEF1A1;PPA2;PPA1;RPL7L1;MRTO4;NHP2;RPL24;RPL27;RPL26;RPL29;RPL28;MRPL18;MRPL16;SNU13;MRPL13;MRPL11;RPL41;MRPL27;MRPL28;MRPL23;MRPL24;RPS26;AIMP1;RPS25;RPS28;RPS27;COPS5;RPS…
Turquoise	Reactome_2016.2	Translation Homo sapiens R-HSA-72766	107/151	3.10738e-82	1.6205e-79	29.6194	5558.92	N6AMT1;RPL4;EIF4A2;RPL5;SRP19;EIF4A1;RPL30;RPL3;RPL32;RPL31;RPL34;SRP14;RPL8;RPL10A;RPL9;RPL6;RPL7;EEF1B2;RPS15;RPS14;RPS17;RPS16;RPS19;RPL18A;RPS18;RPL36;RPL35;RPL38;RPL37;RPS11;RPL39;RPS13;RPS12;RPS9;RPL21;RPS7;RPS8;RPL23;RPS5;RPL22;RPS6;RPSA;EEF1A1;RPL24;RPL27;RPL26;RPL29;RPL28;UBA52;RPN1;EIF2B3;RPL41;EIF2S2;RPS26;RPS25;RPS28;RPS27;RPS29;RPL27A;RPS20;RPS21;RPS24;RPS23;RPLP1;RPLP0;RPS4X;TRMT112…
Turquoise	GO_Biological_Process_2018.2	protein targeting to ER (GO:0045047)	86/97	4.56323e-82	6.8494e-79	94.0844	17621.4	RPL4;RPL5;SRP19;RPL30;RPL3;RPL32;RPL31;RPL34;RPLP1;RPLP0;SRP14;RPL8;RPL10A;RPL9;RPL6;RPL7;RPS15;RPS4X;RPS14;RPL7A;RPS17;RPS16;RPS19;RPL18A;RPS18;SEC61G;RPL36;RPL35;RPLP2;RPL38;RPL37;SEC62;RPS11;RPL39;RPS13;RPS9;RPL21;RPS7;RPS8;RPL23;RPS5;RPL22;RPS6;RPL13A;RPSA;RPS3A;SRP9;RPL37A;RPL24;CHMP4B;RPL27;RPL26;RPL29;RPL28;UBA52;RPL10;RPL12;RPL11;RPL36A;RPS15A;RPL14;RPS3;RPL13;RPL15;RPS2;RPL18;RPS27A;RPL1…
Turquoise	Reactome_2016.3	Peptide chain elongation Homo sapiens R-HSA-156902	79/84	1.43287e-80	4.9816e-78	189.332	34808.2	RPL4;RPL5;RPL30;RPL3;RPL32;RPL31;RPL34;RPLP1;RPLP0;RPL10A;RPL8;RPL9;RPL6;RPL7;RPS4X;RPS15;RPL7A;RPS14;RPS17;RPS16;RPL18A;RPS19;RPS18;RPL36;RPL35;RPLP2;RPL38;RPL37;RPS11;RPL39;RPS13;RPS12;RPS9;RPL21;RPS7;RPS8;RPL23;RPS5;RPL22;RPS6;RPL13A;RPS3A;RPSA;EEF1A1;RPL37A;RPL24;RPL27;RPL26;RPL29;RPL28;UBA52;RPL10;RPL12;RPL11;RPL36A;RPS15A;RPL14;RPS3;RPL13;RPL15;RPS2;RPL18;RPS27A;RPL17;RPL19;RPL41;RPL35A;RPL…
Turquoise	GO_Biological_Process_2018.3	peptide biosynthetic process (GO:0043043)	113/174	3.34678e-80	3.34901e-77	22.6321	4141.65	RPL4;RPL5;RPL30;RPL3;RPL32;RPL31;RPL34;RPL8;RPL10A;RPL9;RPL6;RPL7;RPS15;RPS14;RPS17;RPS16;RPS19;RPL18A;RPS18;RPL36;RPL35;RPL38;RPL37;RPS11;RPL39;RPS13;RPS9;RPL21;RPS7;RPS8;RPL23;RPS5;RPL22;RPS6;RPSA;MRPS18C;EEF1A1;NHP2;RPL24;RPL27;RPL26;RPL29;RPL28;MRPL18;SNU13;MRPL13;MRPL11;RPL41;MRPL27;MRPL28;MRPL23;MRPL24;RPS26;RPS25;RPS28;COPS5;RPS27;RPS29;RPL27A;RPS20;RPS21;RSL24D1;RPS24;FARSB;RPS23;MRPS15;M…
Turquoise	Reactome_2016.4	Eukaryotic Translation Elongation Homo sapiens R-HSA-156842	81/89	1.53368e-79	3.72154e-77	121.467	22043.4	RPL4;RPL5;RPL30;RPL3;RPL32;RPL31;RPL34;RPLP1;RPLP0;RPL10A;RPL8;RPL9;RPL6;RPL7;EEF1B2;RPS4X;RPS15;RPL7A;RPS14;RPS17;RPS16;RPL18A;RPS19;RPS18;RPL36;RPL35;RPLP2;RPL38;RPL37;RPS11;RPL39;RPS13;RPS12;RPS9;RPL21;RPS7;RPS8;RPL23;RPS5;RPL22;RPS6;RPL13A;RPS3A;RPSA;EEF1A1;EEF1G;RPL37A;RPL24;RPL27;RPL26;RPL29;RPL28;UBA52;RPL10;RPL12;RPL11;RPL36A;RPS15A;RPL14;RPS3;RPL13;RPL15;RPS2;RPL18;RPS27A;RPL17;RPL19;RPL…
Turquoise	Reactome_2016.5	Eukaryotic Translation Termination Homo sapiens R-HSA-72764	80/87	1.78406e-79	3.72154e-77	137.024	24845.8	N6AMT1;RPL4;RPL5;RPL30;RPL3;RPL32;RPL31;RPL34;RPLP1;RPLP0;RPL10A;RPL8;RPL9;RPL6;RPL7;RPS4X;RPS15;TRMT112;RPL7A;RPS14;RPS17;RPS16;RPL18A;RPS19;RPS18;RPL36;RPL35;RPLP2;RPL38;RPL37;RPS11;RPL39;RPS13;RPS12;RPS9;RPL21;RPS7;RPS8;RPL23;RPS5;RPL22;RPS6;RPL13A;RPS3A;RPSA;RPL37A;RPL24;RPL27;RPL26;RPL29;RPL28;UBA52;RPL10;RPL12;RPL11;RPL36A;RPS15A;RPL14;RPS3;RPL13;RPL15;RPS2;RPL18;RPS27A;RPL17;RPL19;RPL41;RP…
Turquoise	Reactome_2016.6	Formation of a pool of free 40S subunits Homo sapiens R-HSA-72689	84/96	4.49744e-79	7.81805e-77	84.1236	15176	RPL4;RPL5;RPL30;RPL3;RPL32;RPL31;RPL34;RPLP1;RPLP0;RPL10A;RPL8;RPL9;RPL6;RPL7;RPS4X;RPS15;RPL7A;RPS14;RPS17;RPS16;RPL18A;RPS19;RPS18;RPL36;RPL35;RPLP2;RPL38;RPL37;RPS11;RPL39;RPS13;RPS12;RPS9;RPL21;RPS7;RPS8;RPL23;RPS5;RPL22;RPS6;RPL13A;RPS3A;RPSA;RPL37A;RPL24;RPL27;RPL26;RPL29;RPL28;UBA52;RPL10;RPL12;RPL11;RPL36A;RPS15A;RPL14;RPS3;RPL13;RPL15;RPS2;RPL18;RPS27A;RPL17;RPL19;RPL41;RPL35A;RPL23A;RPS…
Turquoise	GO_Biological_Process_2018.4	SRP-dependent cotranslational protein targeting to membrane (GO:0006614)	81/89	1.53368e-79	1.15103e-76	121.467	22043.4	RPL4;RPL5;SRP19;RPL30;RPL3;RPL32;RPL31;RPL34;RPLP1;ZFAND2B;RPLP0;SRP14;RPL10A;RPL8;RPL9;RPL6;RPL7;RPS4X;RPS15;RPL7A;RPS14;RPS17;RPS16;RPL18A;RPS19;RPS18;RPL36;RPL35;RPLP2;RPL38;SEC61B;RPL37;RPS11;RPL39;RPS13;RPS9;RPL21;RPS7;RPS8;RPL23;RPS5;RPL22;RPS6;RPL13A;RPS3A;RPSA;SRP9;RPL37A;RPL24;RPL27;RPL26;RPL29;RPL28;UBA52;RPL10;RPL12;RPL11;RPL36A;RPS15A;RPL14;RPS3;RPL13;RPL15;RPS2;RPL18;RPS27A;RPL17;RPL…
Turquoise	Reactome_2016.7	L13a-mediated translational silencing of Ceruloplasmin expression Homo sapiens R-HSA-156827	88/106	1.50239e-78	1.95874e-76	58.8879	10552.4	RPL4;EIF4A2;RPL5;EIF4A1;RPL30;RPL3;RPL32;RPL31;RPL34;RPLP1;RPLP0;RPL8;RPL10A;RPL9;RPL6;RPL7;RPS15;RPS4X;RPS14;RPL7A;RPS17;RPS16;RPS19;RPL18A;RPS18;RPL36;RPL35;RPLP2;RPL38;RPL37;RPS11;RPL39;RPS13;RPS12;RPS9;RPL21;RPS7;RPS8;RPL23;RPS5;RPL22;RPS6;RPL13A;RPSA;RPS3A;RPL37A;RPL24;RPL27;RPL26;RPL29;RPL28;UBA52;RPL10;RPL12;RPL11;RPL36A;RPS15A;RPL14;RPS3;EIF4H;RPL13;RPL15;RPS2;RPL18;RPS27A;RPL17;RPL19;RPL…
Turquoise	Reactome_2016.8	3' -UTR-mediated translational regulation Homo sapiens R-HSA-157279	88/106	1.50239e-78	1.95874e-76	58.8879	10552.4	RPL4;EIF4A2;RPL5;EIF4A1;RPL30;RPL3;RPL32;RPL31;RPL34;RPLP1;RPLP0;RPL8;RPL10A;RPL9;RPL6;RPL7;RPS15;RPS4X;RPS14;RPL7A;RPS17;RPS16;RPS19;RPL18A;RPS18;RPL36;RPL35;RPLP2;RPL38;RPL37;RPS11;RPL39;RPS13;RPS12;RPS9;RPL21;RPS7;RPS8;RPL23;RPS5;RPL22;RPS6;RPL13A;RPSA;RPS3A;RPL37A;RPL24;RPL27;RPL26;RPL29;RPL28;UBA52;RPL10;RPL12;RPL11;RPL36A;RPS15A;RPL14;RPS3;EIF4H;RPL13;RPL15;RPS2;RPL18;RPS27A;RPL17;RPL19;RPL…
Turquoise	Reactome_2016.9	Viral mRNA Translation Homo sapiens R-HSA-192823	78/84	2.2638e-78	2.62349e-76	155.67	27831.3	RPL4;RPL5;RPL30;RPL3;RPL32;RPL31;RPL34;RPLP1;RPLP0;RPL10A;RPL8;RPL9;RPL6;RPL7;RPS4X;RPS15;RPL7A;RPS14;RPS17;RPS16;RPL18A;RPS19;RPS18;RPL36;RPL35;RPLP2;RPL38;RPL37;RPS11;RPL39;RPS13;RPS12;RPS9;RPL21;RPS7;RPS8;RPL23;RPS5;RPL22;RPS6;RPL13A;RPS3A;RPSA;RPL37A;RPL24;RPL27;RPL26;RPL29;RPL28;UBA52;RPL10;RPL12;RPL11;RPL36A;RPS15A;RPL14;RPS3;RPL13;RPL15;RPS2;RPL18;RPS27A;RPL17;RPL19;RPL41;RPL35A;RPL23A;RPS…
Turquoise	Reactome_2016.10	GTP hydrolysis and joining of the 60S ribosomal subunit Homo sapiens R-HSA-72706	88/107	7.82185e-78	8.15819e-76	55.7855	9904.42	RPL4;EIF4A2;RPL5;EIF4A1;RPL30;RPL3;RPL32;RPL31;RPL34;RPLP1;RPLP0;RPL8;RPL10A;RPL9;RPL6;RPL7;RPS15;RPS4X;RPS14;RPL7A;RPS17;RPS16;RPS19;RPL18A;RPS18;RPL36;RPL35;RPLP2;RPL38;RPL37;RPS11;RPL39;RPS13;RPS12;RPS9;RPL21;RPS7;RPS8;RPL23;RPS5;RPL22;RPS6;RPL13A;RPSA;RPS3A;RPL37A;RPL24;RPL27;RPL26;RPL29;RPL28;UBA52;RPL10;RPL12;RPL11;RPL36A;RPS15A;RPL14;RPS3;EIF4H;RPL13;RPL15;RPS2;RPL18;RPS27A;RPL17;RPL19;RPL…
Turquoise	Reactome_2016.11	Infectious disease Homo sapiens R-HSA-5663205	155/348	3.6449e-77	3.45603e-75	10.0218	1763.89	RPL4;RPL5;RPL30;RPL3;RPL32;RPL31;RPL34;GTF2B;RPL8;RPL10A;RPL9;RPL6;RPL7;PSMD8;RPS15;PSMD9;RPS14;PSMD6;RPS17;PSMD7;RPS16;PSMD4;RPS19;RPL18A;RPS18;RPL36;RPL35;RPL38;BANF1;RPL37;RPS11;B2M;RPL39;RPS13;RPS12;SKP1;MAP2K3;RPS9;RPL21;RPS7;RPS8;RPL23;RPS5;RPL22;RPS6;RPSA;GTF2F1;GTF2F2;RBX1;PSME1;RPL24;PSME2;CHMP4B;RPL27;RPL26;RPL29;RPL28;UBA52;PPIA;VPS28;PSMD10;PSMD12;TSG101;PSMD14;PSMD13;SUPT4H1;GTF2E2;U…
Turquoise	Reactome_2016.12	Nonsense Mediated Decay (NMD) independent of the Exon Junction Complex (EJC) Homo sapiens R-HSA-975956	79/89	1.59222e-75	1.38391e-73	94.6404	16299.8	RPL4;RPL5;RPL30;RPL3;RPL32;RPL31;RPL34;RPLP1;RPLP0;RPL10A;RPL8;RPL9;RPL6;RPL7;RPS4X;RPS15;RPL7A;RPS14;RPS17;RPS16;RPL18A;RPS19;RPS18;RPL36;RPL35;RPLP2;RPL38;RPL37;RPS11;RPL39;RPS13;RPS12;RPS9;RPL21;RPS7;RPS8;NCBP2;RPL23;RPS5;RPL22;RPS6;RPL13A;RPS3A;RPSA;RPL37A;RPL24;RPL27;RPL26;RPL29;RPL28;UBA52;RPL10;RPL12;RPL11;RPL36A;RPS15A;RPL14;RPS3;RPL13;RPL15;RPS2;RPL18;RPS27A;RPL17;RPL19;RPL41;RPL35A;RPL2…
Turquoise	Reactome_2016.13	Selenocysteine synthesis Homo sapiens R-HSA-2408557	78/87	2.25541e-75	1.80954e-73	103.763	17834.8	RPL4;RPL5;RPL30;RPL3;RPL32;RPL31;RPL34;RPLP1;RPLP0;RPL10A;RPL8;RPL9;RPL6;RPL7;RPS4X;RPS15;RPL7A;RPS14;RPS17;RPS16;RPL18A;RPS19;RPS18;RPL36;RPL35;RPLP2;RPL38;RPL37;RPS11;RPL39;RPS13;RPS12;RPS9;RPL21;RPS7;RPS8;RPL23;RPS5;RPL22;RPS6;RPL13A;RPS3A;RPSA;RPL37A;RPL24;RPL27;RPL26;RPL29;RPL28;UBA52;RPL10;RPL12;RPL11;RPL36A;RPS15A;RPL14;RPS3;RPL13;RPL15;RPS2;RPL18;RPS27A;RPL17;RPL19;RPL41;RPL35A;RPL23A;RPS…
Turquoise	GO_Biological_Process_2018.5	cotranslational protein targeting to membrane (GO:0006613)	81/93	6.60349e-76	3.96474e-73	80.9603	14015	RPL4;RPL5;SRP19;RPL30;RPL3;RPL32;RPL31;RPL34;RPLP1;RPLP0;SRP14;RPL10A;RPL8;RPL9;RPL6;RPL7;RPS4X;RPS15;RPL7A;RPS14;RPS17;RPS16;RPL18A;RPS19;RPS18;RPL36;RPL35;RPLP2;RPL38;RPL37;SEC62;RPS11;RPL39;RPS13;RPS9;RPL21;RPS7;RPS8;RPL23;SSR2;RPS5;RPL22;RPS6;RPL13A;RPS3A;RPSA;SRP9;RPL37A;RPL24;RPL27;RPL26;RPL29;RPL28;UBA52;RPL10;RPL12;RPL11;RPL36A;RPS15A;RPL14;RPS3;RPL13;RPL15;RPS2;RPL18;RPS27A;RPL17;RPL19;R…
Turquoise	Reactome_2016.14	Cap-dependent Translation Initiation Homo sapiens R-HSA-72737	89/114	6.83637e-75	4.75356e-73	42.8929	7324.88	RPL4;EIF4A2;RPL5;EIF4A1;RPL30;RPL3;RPL32;RPL31;RPL34;RPLP1;RPLP0;RPL8;RPL10A;RPL9;RPL6;RPL7;RPS15;RPS4X;RPS14;RPL7A;RPS17;RPS16;RPS19;RPL18A;RPS18;RPL36;RPL35;RPLP2;RPL38;RPL37;RPS11;RPL39;RPS13;RPS12;RPS9;RPL21;RPS7;RPS8;RPL23;RPS5;RPL22;RPS6;RPL13A;RPSA;RPS3A;RPL37A;RPL24;RPL27;RPL26;RPL29;RPL28;UBA52;RPL10;RPL12;RPL11;RPL36A;RPS15A;RPL14;RPS3;EIF4H;RPL13;RPL15;RPS2;RPL18;RPS27A;RPL17;RPL19;EIF…
Turquoise	Reactome_2016.15	Eukaryotic Translation Initiation Homo sapiens R-HSA-72613	89/114	6.83637e-75	4.75356e-73	42.8929	7324.88	RPL4;EIF4A2;RPL5;EIF4A1;RPL30;RPL3;RPL32;RPL31;RPL34;RPLP1;RPLP0;RPL8;RPL10A;RPL9;RPL6;RPL7;RPS15;RPS4X;RPS14;RPL7A;RPS17;RPS16;RPS19;RPL18A;RPS18;RPL36;RPL35;RPLP2;RPL38;RPL37;RPS11;RPL39;RPS13;RPS12;RPS9;RPL21;RPS7;RPS8;RPL23;RPS5;RPL22;RPS6;RPL13A;RPSA;RPS3A;RPL37A;RPL24;RPL27;RPL26;RPL29;RPL28;UBA52;RPL10;RPL12;RPL11;RPL36A;RPS15A;RPL14;RPS3;EIF4H;RPL13;RPL15;RPS2;RPL18;RPS27A;RPL17;RPL19;EIF…
Turquoise	WikiPathways_2019_Human.1	Cytoplasmic Ribosomal Proteins WP477	78/89	1.37165e-73	4.403e-71	84.8877	14241.8	RPL4;RPL5;RPL30;RPL3;RPL32;RPL31;RPL34;RPLP1;RPLP0;RPL10A;RPL8;RPL9;RPL6;RPL7;RPS4X;RPS15;RPL7A;RPS14;RPS17;RPS16;RPL18A;RPS19;RPS18;RPL36;RPL35;RPLP2;RPL38;RPL37;RPS11;RPL39;RPS13;RPS12;RPS9;RPL21;RPS7;RPS8;RPL23;RPS5;RPL22;RPS6;RPL13A;RPS3A;RPSA;RPL37A;RPL24;RPL27;RPL26;RPL29;RPL28;UBA52;RPL10;RPL12;RPL11;RPL36A;RPS15A;RPL14;RPS3;RPL13;RPL15;RPS2;RPL18;RPS27A;RPL17;RPL19;RPL41;RPL35A;RPL23A;RPS…
Turquoise	Reactome_2016.16	Influenza Viral RNA Transcription and Replication Homo sapiens R-HSA-168273	90/128	9.41861e-69	6.13976e-67	28.5346	4469.53	RPL4;RPL5;RPL30;RPL3;RPL32;RPL31;RPL34;RPLP1;RPLP0;RPL8;RPL10A;RPL9;RPL6;RPL7;RPS15;RPS4X;RPS14;RPL7A;RPS17;RPS16;RPS19;RPL18A;RPS18;RPL36;RPL35;RPLP2;RPL38;RPL37;RPS11;RPL39;RPS13;RPS12;RPS9;HSP90AA1;RPL21;RPS7;RPS8;RPL23;RPS5;RPL22;RPS6;RPL13A;RPSA;RPS3A;GTF2F1;GTF2F2;RPL37A;RPL24;RPL27;RPL26;RPL29;RPL28;UBA52;RPL10;RPL12;RPL11;RPL36A;RPS15A;POLR2D;RPL14;RPS3;RPL13;POLR2F;NUP43;POLR2G;RPL15;RPS…
Turquoise	Reactome_2016.17	Nonsense-Mediated Decay (NMD) Homo sapiens R-HSA-927802	82/106	1.84124e-68	1.0669e-66	40.9799	6391.45	RPL4;RPL5;RPL30;RPL3;RPL32;RPL31;RPL34;RPLP1;RPLP0;RPL8;RPL10A;RPL9;RPL6;RPL7;RPS15;RPS4X;RPS14;RPL7A;RPS17;RPS16;RPS19;RPL18A;RPS18;MAGOH;RPL36;RPL35;RPLP2;RPL38;RPL37;RPS11;RPL39;RPS13;RPS12;RPS9;RPL21;RPS7;RPS8;NCBP2;RPL23;RPS5;RPL22;RPS6;RPL13A;RPSA;RPS3A;RPL37A;RPL24;RPL27;RPL26;RPL29;RPL28;UBA52;RBM8A;RPL10;RPL12;RPL11;RPL36A;RPS15A;RPL14;RPS3;RPL13;RPL15;RPS2;RPL18;RPS27A;RPL17;RPL19;RPL41…
Turquoise	Reactome_2016.18	Nonsense Mediated Decay (NMD) enhanced by the Exon Junction Complex (EJC) Homo sapiens R-HSA-975957	82/106	1.84124e-68	1.0669e-66	40.9799	6391.45	RPL4;RPL5;RPL30;RPL3;RPL32;RPL31;RPL34;RPLP1;RPLP0;RPL8;RPL10A;RPL9;RPL6;RPL7;RPS15;RPS4X;RPS14;RPL7A;RPS17;RPS16;RPS19;RPL18A;RPS18;MAGOH;RPL36;RPL35;RPLP2;RPL38;RPL37;RPS11;RPL39;RPS13;RPS12;RPS9;RPL21;RPS7;RPS8;NCBP2;RPL23;RPS5;RPL22;RPS6;RPL13A;RPSA;RPS3A;RPL37A;RPL24;RPL27;RPL26;RPL29;RPL28;UBA52;RBM8A;RPL10;RPL12;RPL11;RPL36A;RPS15A;RPL14;RPS3;RPL13;RPL15;RPS2;RPL18;RPS27A;RPL17;RPL19;RPL41…
Turquoise	Reactome_2016.19	Influenza Life Cycle Homo sapiens R-HSA-168255	92/136	7.68407e-68	4.21815e-66	25.216	3896.8	RPL4;RPL5;RPL30;RPL3;RPL32;RPL31;RPL34;RPLP1;RPLP0;CLTA;RPL8;RPL10A;RPL9;RPL6;RPL7;RPS15;RPS4X;RPS14;RPL7A;RPS17;RPS16;RPS19;RPL18A;RPS18;RPL36;RPL35;RPLP2;RPL38;RPL37;RPS11;RPL39;RPS13;RPS12;RPS9;HSP90AA1;RPL21;RPS7;RPS8;RPL23;RPS5;RPL22;RPS6;RPL13A;RPSA;RPS3A;GTF2F1;GTF2F2;RPL37A;RPL24;RPL27;RPL26;RPL29;RPL28;UBA52;RPL10;RPL12;RPL11;RPL36A;RPS15A;POLR2D;RPL14;RPS3;RPL13;POLR2F;NUP43;POLR2G;RPL1…
Turquoise	GO_Biological_Process_2018.6	nuclear-transcribed mRNA catabolic process, nonsense-mediated decay (GO:0000184)	83/112	1.3905e-66	6.95714e-64	34.3411	5207.52	RPL4;RPL5;RPL30;RPL3;RPL32;RPL31;RPL34;RPLP1;RPLP0;RPL8;RPL10A;RPL9;RPL6;RPL7;RPS15;RPS4X;RPS14;RPL7A;RPS17;RPS16;RPS19;RPL18A;RPS18;MAGOH;RPL36;RPL35;RPLP2;RPL38;RPL37;RPS11;RPL39;RPS13;RPS9;RPL21;RPS7;RPS8;NCBP2;RPL23;RPS5;RPL22;RPS6;RPL13A;RPSA;RPS3A;RPL37A;RPL24;RPL27;RPL26;RPL29;RPL28;UBA52;RBM8A;RPL10;RPL12;RPL11;RPL36A;RPS15A;RPL14;RPS3;RPL13;RPL15;RPS2;RPL18;RPS27A;RPL17;RPL19;RPL41;PYM1;…
Turquoise	Reactome_2016.20	Influenza Infection Homo sapiens R-HSA-168254	92/147	3.19855e-63	1.66804e-61	20.1607	2901.13	RPL4;RPL5;RPL30;RPL3;RPL32;RPL31;RPL34;RPLP1;RPLP0;CLTA;RPL8;RPL10A;RPL9;RPL6;RPL7;RPS15;RPS4X;RPS14;RPL7A;RPS17;RPS16;RPS19;RPL18A;RPS18;RPL36;RPL35;RPLP2;RPL38;RPL37;RPS11;RPL39;RPS13;RPS12;RPS9;HSP90AA1;RPL21;RPS7;RPS8;RPL23;RPS5;RPL22;RPS6;RPL13A;RPSA;RPS3A;GTF2F1;GTF2F2;RPL37A;RPL24;RPL27;RPL26;RPL29;RPL28;UBA52;RPL10;RPL12;RPL11;RPL36A;RPS15A;POLR2D;RPL14;RPS3;RPL13;POLR2F;NUP43;POLR2G;RPL1…
Turquoise	Reactome_2016.21	Selenoamino acid metabolism Homo sapiens R-HSA-2408522	80/111	1.37815e-62	6.84481e-61	30.9004	4401.44	RPL4;RPL5;RPL30;RPL3;RPL32;RPL31;RPL34;RPLP1;RPLP0;HNMT;RPL8;RPL10A;RPL9;RPL6;RPL7;RPS15;RPS4X;RPS14;RPL7A;RPS17;RPS16;RPS19;RPL18A;RPS18;RPL36;RPL35;RPLP2;RPL38;RPL37;RPS11;RPL39;RPS13;RPS12;RPS9;RPL21;RPS7;RPS8;RPL23;RPS5;RPL22;RPS6;RPL13A;RPSA;RPS3A;RPL37A;RPL24;RPL27;RPL26;RPL29;RPL28;UBA52;RPL10;RPL12;RPL11;RPL36A;RPS15A;RPL14;RPS3;RPL13;RPL15;RPS2;RPL18;RPS27A;RPL17;RPL19;RPL41;RPL35A;RPL23…
Turquoise	GO_Biological_Process_2018.7	rRNA processing (GO:0006364)	107/202	5.53801e-63	2.37502e-60	13.6803	1961.09	RPL4;RPL5;RPL30;RPL3;RPL32;RPL31;RPL34;RPP30;FCF1;RPL8;RPL10A;RPL9;RPL6;RPL7;RPS15;RPS14;RPS17;RPS16;RPS19;RPL18A;RPS18;RPL36;RPL35;RPL38;RPL37;RPS11;RPL39;RPS13;RPP38;RPS9;RPL21;RPS7;IMP3;RPS8;RPL23;RPS5;RPL22;RPS6;RPSA;MRTO4;RPP21;SBDS;NHP2;RPL24;RPL27;RPL26;RPL29;RPL28;UBA52;SNU13;RPF1;RRP7A;EMG1;LYAR;RPL41;RPS26;RCL1;RPS25;RPS28;RPS27;LSM6;RPS29;RPL27A;RPS20;RPS21;RPS24;RPS23;RPLP1;RPLP0;RPS4…
Turquoise	Reactome_2016.22	rRNA processing Homo sapiens R-HSA-72312	99/180	2.14966e-60	1.01913e-58	14.7781	2030.36	RPL4;RPL5;RPL30;RPL3;RPL32;RPL31;RPL34;RPP30;FCF1;RPL8;RPL10A;RPL9;RPL6;RPL7;RPS15;RPS14;RPS17;RPS16;RPS19;RPL18A;RPS18;RPL36;RPL35;RPL38;RPL37;RPS11;RPL39;RPP38;RPS13;RPS12;RPS9;RPL21;RPS7;RPS8;IMP3;RPL23;RPS5;RPL22;RPS6;RPSA;RPP21;NHP2;RPL24;RPL27;RPL26;RPL29;RPL28;UBA52;RRP7A;EMG1;RPL41;RPS26;RCL1;RPS25;RPS28;RPS27;RPS29;RPL27A;RPS20;RPS21;NOP10;RPS24;RPS23;RPLP1;RPLP0;RPS4X;TRMT112;RPL7A;RPLP…
Turquoise	Reactome_2016.23	Major pathway of rRNA processing in the nucleolus Homo sapiens R-HSA-6791226	95/166	3.81778e-60	1.73128e-58	16.1445	2208.81	RPL4;RPL5;RPL30;RPL3;RPL32;RPL31;RPL34;RPP30;RPLP1;RPLP0;FCF1;RPL8;RPL10A;RPL9;RPL6;RPL7;RPS15;RPS4X;RPS14;RPL7A;RPS17;RPS16;RPS19;RPL18A;RPS18;RPL36;RPL35;RPLP2;RPL38;RPL37;RPS11;RPL39;RPP38;RPS13;RPS12;RPS9;RPL21;RPS7;RPS8;IMP3;RPL23;RPS5;RPL22;RPS6;RPL13A;RPSA;RPS3A;RPL37A;C1D;RPP21;RPL24;RPL27;RPL26;RPL29;RPL28;UBA52;RPL10;RPL12;RPL11;RPL36A;RRP7A;EXOSC7;EMG1;RPS15A;EXOSC9;PES1;RPL14;RPS3;RPL…
Turquoise	GO_Biological_Process_2018.8	nuclear-transcribed mRNA catabolic process (GO:0000956)	97/174	6.25142e-60	2.34584e-57	15.2149	2074.14	RPL4;EIF4A2;RPL5;EIF4A1;RPL30;RPL3;RPL32;RPL31;RPL34;RPL8;RPL10A;RPL9;RPL6;RPL7;RPS15;RPS14;RPS17;RPS16;RPS19;RPL18A;RPS18;MAGOH;RPL36;RPL35;RPL38;RPL37;RPS11;RPL39;RPS13;RPS9;RPL21;RPS7;RPS8;RPL23;RPS5;RPL22;RPS6;RPSA;MRTO4;RPL24;RPL27;RPL26;RPL29;RPL28;UBA52;RBM8A;RPL41;LSM1;PYM1;UPF3B;LSM5;MAGOHB;NBDY;LSM4;RPS26;RPS25;RPS28;RPS27;RPS29;RPL27A;RPS20;CNOT8;RPS21;RPS24;RPS23;RPLP1;RPLP0;RPS4X;RPL…
Turquoise	Reactome_2016.24	Metabolism of amino acids and derivatives Homo sapiens R-HSA-71291	133/335	8.89652e-59	3.86628e-57	8.09006	1081.37	RPL4;RPL5;RPL30;RPL3;RPL32;RPL31;RPL34;RPL8;HNMT;RPL10A;RPL9;SAT1;RPL6;RPL7;PSMD8;GCSH;RPS15;PSMD9;RPS14;PSMD6;RPS17;PSMD7;RPS16;PSMD4;RPS19;RPL18A;RPS18;RPL36;RPL35;RPL38;RPL37;RPS11;RPL39;RPS13;RPS12;RPS9;RPL21;RPS7;RPS8;RPL23;RPS5;RPL22;RPS6;RPSA;GCAT;ETHE1;PSME1;RPL24;PSME2;RPL27;RPL26;RPL29;RPL28;UBA52;PSMD10;GCDH;PSMD12;PSMD14;PSMD13;LIAS;OAZ1;OAZ2;ACAT1;ASL;RPL41;PYCR2;RPS26;AIMP1;RPS25;GR…
Turquoise	GO_Biological_Process_2018.9	viral transcription (GO:0019083)	78/113	1.07579e-58	3.23914e-56	26.6441	3556.38	RPL4;RPL5;RPL30;RPL3;RPL32;RPL31;RPL34;RPLP1;RPLP0;RPL8;RPL10A;RPL9;RPL6;RPL7;RPS15;RPS4X;RPS14;RPL7A;RPS17;RPS16;RPS19;RPL18A;RPS18;RPL36;RPL35;RPLP2;RPL38;RPL37;RPS11;RPL39;RPS13;RPS9;RPL21;RPS7;RPS8;RPL23;RPS5;RPL22;RPS6;RPL13A;RPSA;RPS3A;RPL37A;RPL24;RPL27;RPL26;RPL29;RPL28;UBA52;RPL10;RPL12;RPL11;RPL36A;RPS15A;RPL14;RPS3;RPL13;NUP43;RPL15;RPS2;RPL18;RPS27A;RPL17;RPL19;RPL41;RPL35A;RPL23A;USF…
Turquoise	GO_Biological_Process_2018.10	viral gene expression (GO:0019080)	77/110	1.07899e-58	3.23914e-56	27.8815	3721.45	RPL4;RPL5;RPL30;RPL3;RPL32;RPL31;RPL34;RPLP1;RPLP0;RPL8;RPL10A;RPL9;RPL6;RPL7;RPS15;RPS4X;RPS14;RPL7A;RPS17;RPS16;RPS19;RPL18A;RPS18;RPL36;RPL35;RPLP2;RPL38;RPL37;RPS11;RPL39;RPS13;RPS9;RPL21;RPS7;RPS8;RPL23;RPS5;RPL22;RPS6;RPL13A;RPSA;RPS3A;RPL37A;RPL24;RPL27;RPL26;RPL29;RPL28;UBA52;RPL10;RPL12;RPL11;RPL36A;RPS15A;RPL14;RPS3;RPL13;NUP43;RPL15;RPS2;RPL18;RPS27A;RPL17;RPL19;RPL41;RPL35A;RPL23A;RPS…
Turquoise	GO_Biological_Process_2018.11	rRNA metabolic process (GO:0016072)	102/200	5.8941e-58	1.60855e-55	12.5979	1660.11	TRIR;RPL4;RPL5;RPL30;RPL3;RPL32;RPL31;RPL34;RPP30;FCF1;RPL8;RPL10A;RPL9;RPL6;RPL7;RPS15;RPS14;RPS17;RPS16;RPS19;RPL18A;RPS18;RPL36;RPL35;RPL38;RPL37;RPS11;RPL39;RPS13;RPP38;RPS9;RPL21;RPS7;IMP3;RPS8;RPL23;RPS5;RPL22;RPS6;RPSA;MRTO4;RPP21;SBDS;RPL24;RPL27;RPL26;RPL29;RPL28;UBA52;SNU13;RPF1;RRP7A;EMG1;LYAR;RPL41;RPS26;RCL1;RPS25;RPS28;RPS27;RPS29;RPL27A;RPS20;RPS21;RPS24;RPS23;RPLP1;RPLP0;RPS4X;RPL…
Turquoise	GO_Biological_Process_2018.12	ribosome biogenesis (GO:0042254)	108/226	1.26401e-57	3.16214e-55	11.1102	1455.58	RPL4;RPL5;RPL30;RPL3;RPL32;RPL31;RPL34;RPP30;FCF1;RPL8;RPL10A;RPL9;RPL6;RPL7;RPS15;RPS14;RPS17;RPS16;RPS19;RPL18A;RPS18;RPL36;RPL35;RPL38;RPL37;RPS11;RPL39;RPS13;RPP38;RPS9;RPL21;RPS7;IMP3;RPS8;RPL23;RPS5;RPL22;RPS6;WDR74;RPSA;MRTO4;RPP21;SBDS;RPL24;RPL27;RPL26;RPL29;RPL28;UBA52;SNU13;RPF2;RPF1;RRP7A;EMG1;LYAR;RPL41;NOP16;RPS26;RCL1;RPS25;RPS28;RPS27;RPS29;RPL27A;RPS20;RPS21;RPS24;RPS23;RPLP1;RPL…
Turquoise	Reactome_2016.25	Respiratory electron transport Homo sapiens R-HSA-611105	67/88	2.86005e-55	1.19321e-53	37.9019	4760.15	COX7B;NDUFA13;NDUFA11;NDUFA12;COX4I1;ETFB;COX6A1;COX7C;UQCRFS1;COX8A;NDUFC1;SDHC;SDHD;SDHB;COX6B1;COX7A2L;NDUFS8;NDUFS7;SCO2;NDUFS6;NDUFS5;NDUFS4;NDUFS3;NDUFS2;UQCRC2;TMEM126B;NDUFB9;NDUFB8;NDUFB7;NDUFB6;NDUFB10;UQCRB;NDUFB11;NDUFB5;NDUFB4;NDUFB3;NDUFB2;NDUFB1;UQCR11;UQCR10;COX5B;COX5A;COX14;NDUFV3;CYC1;NDUFV2;NDUFV1;NDUFA9;NDUFA8;SURF1;NDUFA7;TIMMDC1;NDUFA6;NDUFA5;NDUFA4;NDUFA3;NDUFA2;NDUFA1;COX…
Turquoise	GO_Biological_Process_2018.13	cellular macromolecule biosynthetic process (GO:0034645)	135/367	6.10477e-55	1.40973e-52	7.14772	892.272	RPL4;RPL5;RPL30;RPL3;RPL32;RPL31;RPL34;RPL8;RPL10A;RPL9;RPL6;RPL7;RPS15;EEF1B2;RPS14;RPS17;RPS16;RPS19;RPL18A;RPS18;RPL36;RPL35;RPL38;RPL37;RPS11;RPL39;RPS13;RPS9;RPL21;RPS7;RPS8;RPL23;RPS5;RPL22;RPS6;RPSA;ILF2;MRPS18C;EEF1A1;NHP2;RPL24;RPL27;RPL26;RPL29;RPL28;SET;RNASEH2A;MRPL18;SNU13;MRPL13;MRPL11;RPL41;MRPL27;MRPL28;MRPL23;MRPL24;RPS26;RPS25;RPS28;RPS27;COPS5;RPS29;RPL27A;RPS20;RPS21;RSL24D1;R…
Turquoise	Reactome_2016.26	Gene Expression Homo sapiens R-HSA-74160	317/1631	1.39695e-53	5.6039e-52	3.17811	386.784	EIF4A2;RPL4;POP5;EIF4A1;RPL5;RPL30;RPL3;RPL32;RPL31;RPL34;RTCB;FCF1;PHAX;RPL8;RPL9;RPL6;RPL7;RPS15;LSM10;PSMD8;RPS14;PSMD9;RPS17;PSMD6;RPS16;PSMD7;SNRPD2;RPL18A;RPS19;PSMD4;SNRPD1;RPS18;MAGOH;RPL36;RPL35;RPL38;SNRPD3;RPL37;RPS11;RPL39;RPS13;RPS12;SAP30BP;TYW5;ZFP1;RPL21;METTL1;IMP3;RPL23;RPL22;MED6;MED7;COX7A2L;RRAGA;PPA2;SCO2;PPA1;RRAGB;CLNS1A;SARNP;PSME1;PSME2;RPL24;TFAM;RPL27;RPL26;RPL29;UBA52…
Turquoise	GO_Biological_Process_2018.14	gene expression (GO:0010467)	142/411	7.39289e-54	1.58525e-51	6.5018	795.424	RPL4;RPL5;ISCA2;RPL30;RPL3;RPL32;RPL31;RPL34;RPL8;RPL10A;RPL9;RPL6;RPL7;RPS15;RPS14;RPS17;RPS16;RPS19;RPL18A;RPS18;MAGOH;RPL36;RPL35;RPL38;RPL37;RPS11;RPL39;RPS13;RPS9;RPL21;RPS7;RPS8;RPL23;RPS5;RPL22;RPS6;RPSA;ILF2;THOC7;MRPS18C;EEF1A1;SARNP;SNRPG;NHP2;RPL24;SRSF3;RPL27;RPL26;RPL29;RPL28;SLBP;RBM8A;MRPL18;SNU13;MRPL13;MRPL11;RPL41;CHTOP;MRPL27;UPF3B;MRPL28;MRPL23;MAGOHB;MRPL24;RPS26;RPS25;LSM7;R…
Turquoise	GO_Biological_Process_2018.15	mitochondrial ATP synthesis coupled electron transport (GO:0042775)	64/85	2.66361e-52	5.33078e-50	36.1346	4291.16	MT-ND6;COX7B;NDUFA13;NDUFA11;NDUFA12;COX4I1;COX6A1;COX7C;MT-ND3;UQCRFS1;PMPCB;COX8A;NDUFC1;SDHC;SDHD;COX6B1;COX7A2L;NDUFS8;NDUFS7;SDHAF2;NDUFS6;NDUFS5;NDUFS4;NDUFS3;NDUFS2;MT-CO2;UQCRC2;NDUFB9;NDUFB8;NDUFB7;NDUFB6;NDUFB10;UQCRB;NDUFB11;NDUFB5;NDUFB4;NDUFB3;NDUFB2;AFG1L;NDUFB1;UQCR11;UQCR10;COX5B;COX5A;NDUFV3;CYC1;NDUFV2;NDUFV1;NDUFA9;NDUFA8;NDUFA7;NDUFA6;UQCC3;NDUFA5;NDUFA4;NDUFA3;NDUFA2;NDUFA1;C…
Turquoise	GO_Biological_Process_2018.16	ncRNA processing (GO:0034470)	103/227	2.90984e-52	5.45959e-50	10.0464	1192.17	RPL4;RPL5;RPL30;RPL3;RPL32;RPL31;RPL34;RPP30;FCF1;RPL8;RPL10A;RPL9;RPL6;RPL7;RPS15;RPS14;RPS17;RPS16;RPS19;RPL18A;RPS18;RPL36;RPL35;RPL38;RPL37;RPS11;RPL39;RPS13;RPP38;RPS9;RPL21;RPS7;IMP3;RPS8;RPL23;RPS5;RPL22;RPS6;RPSA;MRTO4;RPP21;SBDS;RPL24;RPL27;RPL26;RPL29;RPL28;UBA52;SNU13;RPF1;RRP7A;EMG1;LYAR;RPL41;RPS26;RCL1;RPS25;RPS28;RPS27;RPS29;RPL27A;RPS20;RPS21;RPS24;RPS23;RPLP1;RPLP0;RPS4X;RPL7A;RP…
Turquoise	GO_Biological_Process_2018.17	viral process (GO:0016032)	101/220	7.42183e-52	1.31061e-49	10.2545	1207.26	RPL4;RPL5;RPL30;RPL3;RPL32;RPL31;RPL34;RPL8;RPL10A;RPL9;RPL6;RPL7;RPS15;RPS14;RPS17;RPS16;RPS19;RPL18A;RPS18;RPL36;RPL35;DENR;RPL38;RPL37;RPS11;B2M;RPL39;RPS13;RPS9;RPL21;RPS7;RPS8;RPL23;RPS5;RPL22;RPS6;RPSA;RRAGA;RPL24;CHMP4B;RPL27;RPL26;RPL29;RPL28;UBA52;PPIA;VPS28;PPID;TSG101;UBB;ATP6V1H;MCTS1;RPL41;RPS26;RPS25;RPS28;RPS27;RPS29;RPL27A;CHMP2A;RPS20;RPS21;RPS24;RPS23;RPLP1;RPLP0;RPS4X;RPL7A;RPL…
Turquoise	KEGG_2019_Human.2	Oxidative phosphorylation	78/133	1.19862e-50	1.59416e-48	16.9369	1946.86	NDUFA13;COX7B;NDUFA11;NDUFA12;COX4I1;COX6A1;NDUFC2-KCTD14;COX7C;UQCRFS1;ATP6V1E1;COX8A;ATP6V1G1;ATP6V0B;SDHC;NDUFC1;SDHD;SDHB;COX6B1;COX7A2L;NDUFS8;PPA2;NDUFS7;PPA1;NDUFS6;NDUFS5;NDUFS4;NDUFS3;NDUFS2;UQCRC2;NDUFB9;NDUFB8;NDUFB7;NDUFB10;UQCRB;NDUFB6;NDUFB11;NDUFB5;NDUFB4;COX17;NDUFB3;NDUFB2;ATP5MC3;NDUFB1;COX7A2;UQCR11;UQCR10;COX5B;COX5A;ATP5F1B;ATP6V1H;NDUFV3;CYC1;NDUFV2;NDUFV1;ATP6V1D;ATP5MF;ATP…
Turquoise	GO_Biological_Process_2018.18	respiratory electron transport chain (GO:0022904)	65/94	3.76129e-49	6.273e-47	26.5809	2963.82	MT-ND6;COX7B;NDUFA13;NDUFA11;NDUFA12;COX4I1;ETFB;COX6A1;COX7C;MT-ND3;UQCRFS1;PMPCB;COX8A;NDUFC1;SDHC;SDHD;SDHB;COX6B1;COX7A2L;NDUFS8;NDUFS7;SDHAF2;NDUFS6;NDUFS5;NDUFS4;NDUFS3;NDUFS2;MT-CO2;UQCRC2;NDUFB9;NDUFB8;NDUFB7;NDUFB6;NDUFB10;UQCRB;NDUFB11;NDUFB5;NDUFB4;NDUFB3;NDUFB2;AFG1L;NDUFB1;UQCR11;UQCR10;COX5B;COX5A;NDUFV3;CYC1;NDUFV2;NDUFV1;NDUFA9;NDUFA8;NDUFA7;NDUFA6;UQCC3;NDUFA5;NDUFA4;NDUFA3;NDUFA…
Turquoise	Reactome_2016.27	Mitochondrial translation initiation Homo sapiens R-HSA-5368286	61/84	2.80191e-48	1.04371e-46	31.3818	3436.11	MRPS15;MRPS16;MRPS14;MRPS11;MRPL39;MRPS10;MRPL36;MRPL34;MRPL32;MRPL33;MRPL41;MRPL42;MRPL3;MRPL2;MRPL40;MRPL1;MRPL9;CHCHD1;MRPS28;MRPS26;MRPS24;MRPS22;MRPS23;MRPL49;MRPS21;MRPL48;MRPS7;MRPL45;MRPL46;MRPL43;MRPS18C;MRPL44;MRPL52;MRPL53;MRPS9;MRPL50;MRPL51;AURKAIP1;DAP3;MRPS36;MRPS33;MRPL18;MRPL16;MRPL14;MTIF3;MRPL15;MRPS30;MRPL12;MRPL13;MRPL54;MRPL55;MRPL11;MRPL20;GADD45GIP1;MRPL27;MRPL28;MRPL23;MR…
Turquoise	Reactome_2016.28	Mitochondrial translation elongation Homo sapiens R-HSA-5389840	61/84	2.80191e-48	1.04371e-46	31.3818	3436.11	MRPS15;MRPS16;MRPS14;MRPS11;MRPL39;MRPS10;MRPL36;MRPL34;MRPL32;MRPL33;MRPL41;MRPL42;MRPL3;MRPL2;MRPL40;MRPL1;MRPL9;CHCHD1;MRPS28;TSFM;MRPS26;MRPS24;MRPS22;MRPS23;MRPL49;MRPS21;MRPL48;MRPS7;MRPL45;MRPL46;MRPL43;MRPS18C;MRPL44;MRPL52;MRPL53;MRPS9;MRPL50;MRPL51;AURKAIP1;DAP3;MRPS36;MRPS33;MRPL18;MRPL16;MRPL14;MRPL15;MRPS30;MRPL12;MRPL13;MRPL54;MRPL55;MRPL11;MRPL20;GADD45GIP1;MRPL27;MRPL28;MRPL23;MRP…
Turquoise	GO_Biological_Process_2018.19	mitochondrial translational elongation (GO:0070125)	62/87	3.18116e-48	5.02624e-46	29.3603	3211.04	MRPS15;MRPS16;MRPS14;MRPS11;MRPL39;MRPS10;MRPL36;MRPL34;MRPL32;MRPL33;MRPL41;MRPL42;MRPL3;MRPL2;MRPL40;MRPL1;MRPL9;CHCHD1;MRPS28;TSFM;MRPS26;MRPS24;MRPS22;MRPS23;MRPL49;MRPS21;MRPL48;MRPS7;MRPL45;MRPL46;MRPL43;MRPS18C;MRPL44;MRPL52;MRPL53;MRPS9;MRPL50;MRPL51;AURKAIP1;DAP3;MRPS36;MRPS33;MRPL18;MRPL16;MRPL14;MRPL15;MRPS30;MRPL12;MRPL13;MRPL57;MRPL54;MRPL55;MRPL11;MRPL20;GADD45GIP1;MRPL27;MRPL28;MRP…
Turquoise	WikiPathways_2019_Human.2	Electron Transport Chain (OXPHOS system in mitochondria) WP111	67/103	6.36968e-48	1.02233e-45	22.0914	2400.72	COX7B;NDUFA12;COX4I1;COX6A1;COX7C;ATP5IF1;UQCRFS1;COX8A;SDHC;NDUFC1;SDHD;SDHB;COX6B1;COX7A2L;NDUFS8;NDUFS7;NDUFS6;NDUFS5;NDUFS4;NDUFS3;NDUFS2;UQCRC2;SLC25A4;SLC25A14;NDUFB9;NDUFB8;NDUFB7;NDUFB10;UQCRB;NDUFB6;NDUFB5;NDUFB4;COX17;NDUFB3;NDUFB2;ATP5MC3;NDUFB1;COX7A2;UQCR11;UQCR10;COX5B;COX5A;ATP5F1B;NDUFV3;NDUFV2;NDUFV1;ATP5MF;ATP5ME;NDUFA9;NDUFA8;ATP5PF;SURF1;NDUFA7;NDUFA6;ATP5PD;NDUFA5;NDUFA4;ATP5…
Turquoise	Reactome_2016.29	Respiratory electron transport, ATP synthesis by chemiosmotic coupling, and heat production by uncoupling proteins. Homo sapiens R-HSA-163200	68/109	7.92384e-47	2.84985e-45	19.6942	2090.57	NDUFA13;COX7B;NDUFA11;NDUFA12;COX4I1;ETFB;COX6A1;COX7C;UQCRFS1;COX8A;SDHC;NDUFC1;SDHD;SDHB;COX6B1;COX7A2L;NDUFS8;NDUFS7;SCO2;NDUFS6;NDUFS5;NDUFS4;NDUFS3;NDUFS2;UQCRC2;TMEM126B;SLC25A14;NDUFB9;NDUFB8;NDUFB7;NDUFB10;UQCRB;NDUFB6;NDUFB11;NDUFB5;NDUFB4;NDUFB3;NDUFB2;NDUFB1;UQCR11;UQCR10;COX5B;COX5A;COX14;NDUFV3;CYC1;NDUFV2;NDUFV1;NDUFA9;NDUFA8;SURF1;NDUFA7;TIMMDC1;NDUFA6;NDUFA5;NDUFA4;NDUFA3;NDUFA2;N…
Turquoise	Reactome_2016.30	Mitochondrial translation termination Homo sapiens R-HSA-5419276	60/84	8.44074e-47	2.93456e-45	29.5605	3136.03	MRPS15;MRPS16;MRPS14;MRPS11;MRPL39;MRPS10;MRPL36;MRPL34;MRPL32;MRPL33;MRPL41;MRPL42;MRPL3;MRPL2;MRPL40;MRPL1;MRPL9;CHCHD1;MRPS28;MRPS26;MRPS24;MRPS22;MRPS23;MRPL49;MRPS21;MRPL48;MRPS7;MRPL45;MRPL46;MRPL43;MRPS18C;MRPL44;MRPL52;MRPL53;MRPS9;MRPL50;MRPL51;AURKAIP1;DAP3;MRPS36;MRPS33;MRPL18;MRPL16;MRPL14;MRPL15;MRPS30;MRPL12;MRPL13;MRPL54;MRPL55;MRPL11;MRPL20;GADD45GIP1;MRPL27;MRPL28;MRPL23;MRPL24;M…
Turquoise	Reactome_2016.31	Mitochondrial translation Homo sapiens R-HSA-5368287	62/90	8.98478e-47	3.02295e-45	26.2102	2778.97	MRPS15;MRPS16;MRPS14;MRPS11;MRPL39;MRPS10;MRPL36;MRPL34;MRPL32;MRPL33;MRPL41;MRPL42;MRPL3;MRPL2;MRPL40;MRPL1;MRPL9;CHCHD1;MRPS28;TSFM;MRPS26;MRPS24;MRPS22;MRPS23;MRPL49;MRPS21;MRPL48;MRPS7;MRPL45;MRPL46;MRPL43;MRPS18C;MRPL44;MRPL52;MRPL53;MRPS9;MRPL50;MRPL51;AURKAIP1;DAP3;MRPS36;MRPS33;MRPL18;MRPL16;MRPL14;MTIF3;MRPL15;MRPS30;MRPL12;MRPL13;MRPL54;MRPL55;MRPL11;MRPL20;GADD45GIP1;MRPL27;MRPL28;MRPL…
Turquoise	GO_Biological_Process_2018.20	mitochondrial translational termination (GO:0070126)	62/89	3.02686e-47	4.54331e-45	27.1825	2911.62	MRPS15;MRPS16;MRPS14;MRPS11;MRPL39;MRPS10;MRPL36;MRPL34;MRPL32;MRPL33;MRPL41;MRPL42;MRPL3;MTRF1;MRPL2;MRPL40;MRPL1;MRPL9;CHCHD1;MRPS28;MRPS26;MRPS24;MRPS22;MRPS23;MRPL49;MRPS21;MRPL48;MRPS7;MRPL45;MRPL46;MRPL43;MRPS18C;MRPL44;MRPL52;MRPL53;MRPS9;MRPL50;MRPL51;AURKAIP1;DAP3;MRPS36;MRPS33;MRPL18;MRPL16;MRPL14;MRPL15;MRPS30;MRPL12;MRPL13;MRPL57;MRPL54;MRPL55;MRPL11;MRPL20;GADD45GIP1;MRPL27;MRPL28;MR…
Turquoise	GO_Biological_Process_2018.21	translational termination (GO:0006415)	64/96	7.59075e-47	1.08512e-44	23.6992	2516.72	N6AMT1;MRPS15;MRPS16;MRPS14;MRPS11;MRPL39;MRPS10;MRPL36;MRPL34;MRPL32;MRPL33;MRPL41;MRPL3;TRMT112;MRPL42;MRPL2;MTRF1;MRPL1;MRPL40;MRPL9;CHCHD1;MRPS28;MRPS26;MRPS24;MRPS22;MRPS23;MRPL49;MRPS21;MRPL48;MRPS7;MRPL45;MRPL46;MRPL43;MRPS18C;MRPL44;MRPL52;MRPL53;MRPS9;MRPL50;MRPL51;AURKAIP1;DAP3;MRPS36;MRPL18;MRPS33;MRPL16;MRPL14;MRPL15;MRPS30;MRPL12;MRPL13;MRPL57;MRPL54;MRPL11;MRPL55;MRPL20;GADD45GIP1;M…
Turquoise	GO_Biological_Process_2018.22	cellular protein metabolic process (GO:0044267)	145/484	2.45919e-46	3.35568e-44	5.25861	552.255	RPL4;RPL5;RPL30;RPL3;RPL32;RPL31;RPL34;UBE2D2;ARAF;RPL8;RPL10A;RPL9;FBXO22;RPL6;RPL7;RPS15;RPS14;RPS17;RPS16;RPS19;RPL18A;RPS18;RPL36;RPL35;RPL38;RPL37;RPS11;RPL39;B2M;RPS13;RPS9;RPL21;RPS7;RPS8;RPL23;RPS5;RPL22;RPS6;RPSA;PDIA6;MRPS18C;EEF1A1;NHP2;RPL24;RPL27;RPL26;RPL29;RPL28;UBA52;MRPL18;RPN1;HTRA2;SNU13;TXN;MRPL13;MRPL11;UBB;LTA4H;RPL41;MRPL27;MRPL28;MRPL23;MRPL24;RPS26;RPS25;RPS28;COPS5;RPS27…
Turquoise	GO_Biological_Process_2018.23	translational elongation (GO:0006414)	66/105	8.61944e-46	1.12502e-43	20.0714	2082.71	MRPS15;MRPS16;MRPS14;MRPS11;MRPL39;MRPS10;MRPL36;MRPL34;MRPL32;MRPL33;EEF1B2;MRPL41;MRPL3;MRPL42;MRPL2;MRPL1;MRPL40;RACK1;MRPL9;CHCHD1;MRPS28;TSFM;MRPS26;MRPS24;MRPS22;MRPS23;MRPL49;MRPS21;MRPL48;MRPS7;MRPL45;MRPL46;MRPL43;MRPS18C;MRPL44;EEF1A1;EEF1G;MRPL52;MRPL53;MRPS9;MRPL50;MRPL51;AURKAIP1;DAP3;MRPS36;MRPL18;MRPS33;MRPL16;MRPL14;MRPL15;MRPS30;MRPL12;MRPL13;MRPL57;MRPL54;MRPL11;MRPL55;MRPL20;GA…
Turquoise	KEGG_2019_Human.3	Huntington disease	87/193	5.5749e-44	4.94308e-42	9.83238	979.261	COX7B;NDUFA13;NDUFA11;NDUFA12;COX4I1;CLTB;CLTA;COX6A1;COX7C;NDUFC2-KCTD14;UQCRFS1;COX8A;GPX1;SDHC;NDUFC1;SDHD;SDHB;COX6B1;CREB3;COX7A2L;NDUFS8;NDUFS7;NDUFS6;NDUFS5;NDUFS4;VDAC3;NDUFS3;TFAM;VDAC2;NDUFS2;UQCRC2;SLC25A4;NDUFB9;NDUFB8;HDAC2;NDUFB7;NDUFB10;UQCRB;NDUFB6;NDUFB11;NDUFB5;NDUFB4;NDUFB3;NDUFB2;ATP5MC3;NDUFB1;UQCR11;COX7A2;UQCR10;COX5B;COX5A;ATP5F1B;POLR2D;AP2S1;POLR2F;POLR2G;NDUFV3;CYC1;POL…
Turquoise	Reactome_2016.32	The citric acid (TCA) cycle and respiratory electron transport Homo sapiens R-HSA-1428517	77/153	2.08082e-43	6.78218e-42	12.0781	1187.01	NDUFA13;COX7B;NDUFA11;NDUFA12;COX4I1;ETFB;COX6A1;COX7C;MPC1;MPC2;IDH3B;UQCRFS1;COX8A;SDHC;NDUFC1;SDHD;SDHB;COX6B1;COX7A2L;NDUFS8;NDUFS7;SCO2;NDUFS6;NDUFS5;NDUFS4;NDUFS3;NDUFS2;SUCLG1;UQCRC2;TMEM126B;HAGH;SLC25A14;NDUFB9;NDUFB8;FH;NDUFB7;NDUFB10;UQCRB;NDUFB6;NDUFB11;NDUFB5;NDUFB4;NDUFB3;NDUFB2;NDUFB1;UQCR11;UQCR10;PDHB;COX5B;COX5A;COX14;NDUFV3;CYC1;NDUFV2;NDUFV1;NDUFA9;NDUFA8;SURF1;NDUFA7;TIMMDC1;…
Turquoise	GO_Biological_Process_2018.24	mitochondrial translation (GO:0032543)	65/107	9.49253e-44	1.18736e-41	18.3405	1816.87	MRPS15;MRPS16;MRPS14;MRPS11;MRPL39;MRPS10;MRPL36;MRPL34;MRPL32;MRPL33;MRPL41;MRPL3;MRPL42;MTRF1;MRPL2;MRPL1;MRPL40;MRPL9;CHCHD1;MRPS28;TSFM;MRPS26;MRPS24;MRPS22;MRPS23;MRPL49;MRPS21;MRPL48;MRPS7;MRPL45;MRPL46;MRPL43;MRPS18C;MRPL44;MRPL52;MRPL53;MRPS9;MRPL50;MRPL51;AURKAIP1;DAP3;MRPS36;MRPL18;MRPS33;MRPL16;MRPL14;MRPL15;MTIF3;MRPS30;MRPL12;MRPL13;MRPL57;MRPL54;MRPL11;MRPL55;MRPL20;GADD45GIP1;NDUFA…
Turquoise	KEGG_2019_Human.4	Parkinson disease	74/142	3.80065e-43	2.52743e-41	12.9535	1265.24	NDUFA13;COX7B;NDUFA11;NDUFA12;COX4I1;PARK7;COX6A1;NDUFC2-KCTD14;COX7C;UQCRFS1;COX8A;SDHC;NDUFC1;SDHD;SDHB;COX6B1;COX7A2L;NDUFS8;NDUFS7;NDUFS6;NDUFS5;NDUFS4;VDAC3;NDUFS3;VDAC2;NDUFS2;UQCRC2;SLC25A4;NDUFB9;NDUFB8;NDUFB7;NDUFB10;UQCRB;NDUFB6;NDUFB11;NDUFB5;NDUFB4;NDUFB3;NDUFB2;HTRA2;ATP5MC3;NDUFB1;COX7A2;UQCR11;UQCR10;COX5B;COX5A;ATP5F1B;UBB;NDUFV3;CYC1;NDUFV2;NDUFV1;NDUFA9;NDUFA8;ATP5PF;NDUFA7;NDUF…
Turquoise	GO_Biological_Process_2018.25	cytoplasmic translation (GO:0002181)	46/54	1.52195e-42	1.82756e-40	67.4405	6493.75	RPL4;RPL30;RPL32;RPL31;RPLP1;RPLP0;RPL11;RPL36A;RPL10A;RPL8;HSPA14;RPL9;RPL6;RPL7;MRPL2;RPL18A;RPL36;EIF4H;RPS3;RPLP2;RPL38;RPL15;RPL18;RPL39;RPL17;RPL19;RWDD1;RPL41;RPS7;RPL22;RPL35A;RPS3A;RPS26;RPS28;EIF3M;RPS29;RPL7L1;RPL27A;MRTO4;RPL24;RPL22L1;RPS20;RPL26;RPL29;RPS21;RPS23
Turquoise	GO_Biological_Process_2018.26	mitochondrial respiratory chain complex assembly (GO:0033108)	61/97	2.00705e-42	2.31737e-40	20.0353	1923.63	MT-ND6;NDUFA13;NDUFA11;NDUFA12;MT-ND3;NDUFC1;IMMP1L;NDUFS8;NDUFS7;SDHAF2;SCO2;NDUFS6;NDUFS5;NDUFS4;SDHAF1;NDUFS3;NDUFS2;SDHAF4;TMEM126B;NDUFB9;NDUFB8;NDUFB7;NDUFB10;UQCRB;NDUFB6;DMAC1;NDUFB11;NDUFB5;NDUFB4;COX17;NDUFB3;NDUFB2;NDUFB1;UQCR10;SAMM50;COX14;NDUFV3;NDUFV2;NDUFV1;NDUFA9;COA3;NDUFA8;SURF1;NDUFA7;TIMMDC1;NDUFA6;UQCC3;NDUFA5;PET100;UQCC2;NDUFA3;NDUFA2;NDUFA1;NDUFAF8;NDUFAF7;NDUFAF5;NDUFAB1…
Turquoise	Reactome_2016.33	Metabolism Homo sapiens R-HSA-1430728	320/1908	7.48699e-40	2.36634e-38	2.61809	235.864	RPL4;RPL5;RPL30;RPL3;RPL32;RPL31;PITPNB;RPL34;ECI2;NUDT1;RPL8;RPL9;NUDT3;RPL6;RPL7;RPS15;PSMD8;GCSH;RPS14;PSMD9;RPS17;PSMD6;RPS16;PSMD7;SCP2;RPL18A;RPS19;PSMD4;RPS18;FDXR;RPL36;RPL35;RPL38;RPL37;RPS11;RPL39;RPS13;RPS12;STARD5;RPL21;RPL23;RPL22;TALDO1;GCAT;MED6;PISD;MED7;COX7A2L;SCO2;ETHE1;PSME1;PSME2;RPL24;SUCLG1;RPL27;TMEM126B;UQCRC2;HPRT1;RPL26;ADPRM;RPL29;UBA52;RPL28;MMADHC;GCDH;TXN;LIAS;OAZ1;…
Turquoise	DisGeNET.1	Mitochondrial Diseases	122/384	5.86836e-42	3.16246e-38	5.66055	537.407	ISCA2;NDUFA13;NDUFA11;NDUFA12;COX6A1;TXN2;NFU1;MPC1;FDXR;BOLA1;SDHC;SDHD;SDHB;COX6B1;PPA2;SCO2;CLPP;ETHE1;BOLA3;BOLA2;FDX2;SUCLG1;UQCRC2;TMEM126B;ISCU;NDUFB10;UQCRB;NDUFB11;HTRA2;COX7A2;MRPL12;LIAS;TIMM50;RNASEH1;COX14;CYC1;NDUFV3;NDUFV2;NDUFV1;DNAJC19;COA3;SURF1;UQCC3;UQCC2;COQ7;COQ6;CDK5;UQCRQ;NDUFAF5;NDUFAF2;NDUFAF3;CYCS;COX20;COX7B;MRPS16;COX4I1;HCCS;IER3IP1;COX7C;MRPL3;MRPL40;IDH3B;UQCRFS1;C…
Turquoise	Reactome_2016.34	Metabolism of proteins Homo sapiens R-HSA-392499	218/1074	4.19762e-39	1.28768e-37	3.20048	282.815	EIF4A2;RPL4;EIF4A1;RPL5;RPL30;RPL3;CMAS;RPL32;RPL31;RPL34;RPL8;RPL9;RPL6;RPL7;RPS15;RPS14;C1GALT1C1;RPS17;RPS16;RPS19;RPL18A;RPS18;RPL36;RPL35;FBXO6;RPL38;RPL37;SEC62;RPS11;RPL39;B2M;RPS13;RPS12;RPL21;RPL23;RPL22;ALG1;DDIT3;RPL24;RPL27;RPL26;RPL29;RPL28;UBA52;ATF4;RPN1;TXN;GNG10;GRPEL1;RPL41;PMM1;GNG13;CCT6A;RPS26;RPS25;RPS28;RPS27;RPS29;RPL27A;RPS20;RPS21;ITM2B;RPS24;RPS23;RPLP1;CETN2;RPLP0;PIGP…
Turquoise	Reactome_2016.35	Disease Homo sapiens R-HSA-1643685	168/725	1.80983e-37	5.3933e-36	3.72167	314.862	RPL4;RPL5;RPL30;RPL3;RPL32;RPL31;RPL34;GTF2B;RPL8;RPL10A;RPL9;RPL6;RPL7;PSMD8;RPS15;PSMD9;RPS14;PSMD6;C1GALT1C1;RPS17;PSMD7;RPS16;PSMD4;RPS19;RPL18A;RPS18;FDXR;RPL36;RPL35;RPL38;BANF1;RPL37;RPS11;RPL39;B2M;RPS13;RPS12;SKP1;MAP2K3;RPS9;RPL21;RPS7;RPS8;RPL23;RPS5;RPL22;RPS6;RPSA;GTF2F1;GTF2F2;RBX1;CDC37;PSME1;RPL24;PSME2;CHMP4B;RPL27;RPL26;RPL29;RPL28;UBA52;PPIA;VPS28;MMADHC;PSMD10;PSMD12;TSG101;PS…
Turquoise	Reactome_2016.36	Complex I biogenesis Homo sapiens R-HSA-6799198	40/49	1.16958e-35	3.38854e-34	51.9263	4176.63	NDUFB9;NDUFA13;NDUFB8;NDUFB7;NDUFA11;NDUFB6;NDUFB10;NDUFA12;NDUFB11;NDUFB5;NDUFB4;NDUFB3;NDUFB2;NDUFB1;NDUFV3;NDUFV2;NDUFV1;NDUFA9;NDUFA8;NDUFA7;TIMMDC1;NDUFA6;NDUFA5;NDUFA3;NDUFA2;NDUFA1;NDUFC1;NDUFS8;NDUFS7;NDUFS6;NDUFAF7;NDUFS5;NDUFS4;NDUFAB1;NDUFAF5;NDUFS3;NDUFAF2;NDUFS2;NDUFAF3;TMEM126B
Turquoise	KEGG_2019_Human.5	Alzheimer disease	72/171	3.55902e-34	1.8934e-32	8.631	664.746	NDUFA13;COX7B;NDUFA11;NDUFA12;COX4I1;COX6A1;NDUFC2-KCTD14;COX7C;UQCRFS1;COX8A;PSENEN;SDHC;NDUFC1;SDHD;SDHB;COX6B1;COX7A2L;NDUFS8;NDUFS7;NDUFS6;NDUFS5;NDUFS4;NDUFS3;NDUFS2;UQCRC2;NDUFB9;NDUFB8;NDUFB7;NDUFB10;UQCRB;NDUFB6;NDUFB11;NDUFB5;NDUFB4;NDUFB3;NDUFB2;ATP5MC3;NDUFB1;COX7A2;UQCR11;UQCR10;COX5B;COX5A;HSD17B10;ATP5F1B;NDUFV3;CYC1;NDUFV2;NDUFV1;NDUFA9;NDUFA8;ATP5PF;NDUFA7;NDUFA6;ATP5PD;NDUFA5;BAD…
Turquoise	KEGG_2019_Human.6	Thermogenesis	84/231	5.22856e-34	2.318e-32	6.81678	522.395	COX7B;NDUFA13;NDUFA11;NDUFA12;COX4I1;PRKAG1;COX6A1;COX7C;NDUFC2-KCTD14;UQCRFS1;HRAS;COA6;COX8A;MAP2K3;RPS6;SDHC;NDUFC1;SDHD;SDHB;COX6B1;CREB3;COX7A2L;NDUFS8;NDUFS7;NDUFS6;NDUFS5;AKT1S1;NDUFS4;NDUFS3;NDUFS2;UQCRC2;NDUFB9;NDUFB8;NDUFB7;NDUFB10;UQCRB;NDUFB6;NDUFB11;NDUFB5;NDUFB4;COX17;NDUFB3;NDUFB2;ATP5MC3;NDUFB1;UQCR11;COX7A2;UQCR10;COX5B;COX5A;ATP5F1B;COX14;NDUFV3;CYC1;NDUFV2;NDUFV1;ATP5MF;ATP5ME;…
Turquoise	GO_Biological_Process_2018.27	NADH dehydrogenase complex assembly (GO:0010257)	44/64	1.7815e-33	1.84416e-31	25.7536	1942.02	MT-ND6;NDUFB9;NDUFA13;NDUFB8;NDUFB7;NDUFA11;NDUFB6;NDUFB10;DMAC1;NDUFA12;NDUFB11;NDUFB5;NDUFB4;NDUFB3;NDUFB2;NDUFB1;MT-ND3;NDUFV3;NDUFV2;NDUFV1;NDUFA9;NDUFA8;NDUFA7;TIMMDC1;NDUFA6;NDUFA5;NDUFA3;NDUFA2;NDUFA1;NDUFC1;NDUFAF8;NDUFS8;NDUFS7;NDUFS6;NDUFAF7;NDUFS5;NDUFS4;NDUFAB1;NDUFAF5;NDUFS3;NDUFAF2;NDUFS2;NDUFAF3;TMEM126B
Turquoise	GO_Biological_Process_2018.28	mitochondrial respiratory chain complex I biogenesis (GO:0097031)	44/64	1.7815e-33	1.84416e-31	25.7536	1942.02	MT-ND6;NDUFB9;NDUFA13;NDUFB8;NDUFB7;NDUFA11;NDUFB6;NDUFB10;DMAC1;NDUFA12;NDUFB11;NDUFB5;NDUFB4;NDUFB3;NDUFB2;NDUFB1;MT-ND3;NDUFV3;NDUFV2;NDUFV1;NDUFA9;NDUFA8;NDUFA7;TIMMDC1;NDUFA6;NDUFA5;NDUFA3;NDUFA2;NDUFA1;NDUFC1;NDUFAF8;NDUFS8;NDUFS7;NDUFS6;NDUFAF7;NDUFS5;NDUFS4;NDUFAB1;NDUFAF5;NDUFS3;NDUFAF2;NDUFS2;NDUFAF3;TMEM126B
Turquoise	GO_Biological_Process_2018.29	mitochondrial respiratory chain complex I assembly (GO:0032981)	44/64	1.7815e-33	1.84416e-31	25.7536	1942.02	MT-ND6;NDUFB9;NDUFA13;NDUFB8;NDUFB7;NDUFA11;NDUFB6;NDUFB10;DMAC1;NDUFA12;NDUFB11;NDUFB5;NDUFB4;NDUFB3;NDUFB2;NDUFB1;MT-ND3;NDUFV3;NDUFV2;NDUFV1;NDUFA9;NDUFA8;NDUFA7;TIMMDC1;NDUFA6;NDUFA5;NDUFA3;NDUFA2;NDUFA1;NDUFC1;NDUFAF8;NDUFS8;NDUFS7;NDUFS6;NDUFAF7;NDUFS5;NDUFS4;NDUFAB1;NDUFAF5;NDUFS3;NDUFAF2;NDUFS2;NDUFAF3;TMEM126B
Turquoise	Reactome_2016.37	Ribosomal scanning and start codon recognition Homo sapiens R-HSA-72702	41/57	1.48458e-32	4.07478e-31	29.9464	2194.7	EIF4A2;EIF4A1;RPS4X;RPS15;RPS14;RPS17;RPS16;RPS15A;RPS19;RPS18;EIF4H;RPS3;RPS2;RPS11;RPS27A;RPS13;RPS12;RPS9;RPS7;RPS8;RPS5;RPS6;RPS3A;RPSA;EIF2S2;RPS26;RPS25;RPS28;EIF3M;RPS27;EIF3K;RPS29;EIF3I;EIF3G;EIF3H;RPS20;EIF3E;FAU;RPS21;RPS24;RPS23
Turquoise	Reactome_2016.38	Translation initiation complex formation Homo sapiens R-HSA-72649	41/57	1.48458e-32	4.07478e-31	29.9464	2194.7	EIF4A2;EIF4A1;RPS4X;RPS15;RPS14;RPS17;RPS16;RPS15A;RPS19;RPS18;EIF4H;RPS3;RPS2;RPS11;RPS27A;RPS13;RPS12;RPS9;RPS7;RPS8;RPS5;RPS6;RPS3A;RPSA;EIF2S2;RPS26;RPS25;RPS28;EIF3M;RPS27;EIF3K;RPS29;EIF3I;EIF3G;EIF3H;RPS20;EIF3E;FAU;RPS21;RPS24;RPS23
Turquoise	Reactome_2016.39	Activation of the mRNA upon binding of the cap-binding complex and eIFs, and subsequent binding to 43S Homo sapiens R-HSA-72662	41/58	4.67597e-32	1.25052e-30	28.1833	2033.15	EIF4A2;EIF4A1;RPS4X;RPS15;RPS14;RPS17;RPS16;RPS15A;RPS19;RPS18;EIF4H;RPS3;RPS2;RPS11;RPS27A;RPS13;RPS12;RPS9;RPS7;RPS8;RPS5;RPS6;RPS3A;RPSA;EIF2S2;RPS26;RPS25;RPS28;EIF3M;RPS27;EIF3K;RPS29;EIF3I;EIF3G;EIF3H;RPS20;EIF3E;FAU;RPS21;RPS24;RPS23
Turquoise	GO_Biological_Process_2018.30	mitochondrial electron transport, NADH to ubiquinone (GO:0006120)	37/46	1.27785e-32	1.2787e-30	47.9404	3520.62	MT-ND6;NDUFB9;NDUFB8;NDUFA13;NDUFB7;NDUFB6;NDUFB10;NDUFA11;NDUFB11;NDUFA12;NDUFB5;NDUFB4;NDUFB3;NDUFB2;NDUFB1;MT-ND3;NDUFV3;NDUFV2;NDUFV1;NDUFA9;NDUFA8;NDUFA7;NDUFA6;NDUFA5;NDUFA4;NDUFA3;NDUFA2;NDUFA1;NDUFC1;NDUFS8;NDUFS7;NDUFS6;NDUFS5;NDUFAB1;NDUFS4;NDUFS3;NDUFS2
Turquoise	Reactome_2016.40	Formation of the ternary complex, and subsequently, the 43S complex Homo sapiens R-HSA-72695	38/50	8.74507e-32	2.28028e-30	36.9444	2642.05	RPS4X;RPS15;RPS14;RPS17;RPS16;RPS15A;RPS19;RPS18;RPS3;RPS2;RPS11;RPS27A;RPS13;RPS12;RPS9;RPS7;RPS8;RPS5;RPS6;RPS3A;RPSA;EIF2S2;RPS26;RPS25;RPS28;EIF3M;RPS27;EIF3K;RPS29;EIF3I;EIF3G;EIF3H;RPS20;EIF3E;FAU;RPS21;RPS24;RPS23
Turquoise	Reactome_2016.41	Autodegradation of Cdh1 by Cdh1:APC/C Homo sapiens R-HSA-174084	42/62	1.3502e-31	3.43479e-30	24.5517	1745.13	PSMD10;PSMD12;ANAPC15;PSMD14;ANAPC16;PSMD13;PSMB10;PSMA7;ANAPC11;PSMD8;PSMB6;PSMD9;PSMB7;PSMD6;PSMB4;PSMD7;PSMB5;PSMD4;UBB;PSMB2;PSMB3;PSMB1;RPS27A;UBE2E1;PSMB8;PSMA5;PSMA6;PSMA3;PSMC5;PSMA4;PSMC6;PSMA1;PSMC3;PSMA2;PSMC4;PSMC1;PSMC2;CDC16;PSME1;ANAPC4;PSME2;UBA52
Turquoise	GO_Biological_Process_2018.31	negative regulation of ubiquitin protein ligase activity (GO:1904667)	47/77	4.19275e-32	4.0602e-30	18.3648	1326.85	PSMD10;RPL5;PSMD12;ANAPC15;PSMD14;ANAPC16;PSMD13;RPL11;PSMB10;PSMA7;ANAPC11;PSMD8;PSMB6;PSMD9;PSMB7;PSMD6;PSMB4;PSMD7;PSMB5;PSMD4;UBB;PSMB2;PSMB3;PSMB1;BUB3;RPS27A;RPS7;RPL23;UBE2E1;PSMB8;PSMA5;PSMA6;PSMA3;PSMC5;PSMA4;PSMC6;PSMA1;PSMC3;PSMA2;PSMC4;PSMC1;PSMC2;CDC16;PSME1;ANAPC4;PSME2;UBA52
Turquoise	KEGG_2019_Human.7	Non-alcoholic fatty liver disease (NAFLD)	64/149	3.99364e-31	1.51758e-29	8.89627	622.699	NDUFA13;COX7B;NDUFA11;NDUFA12;COX4I1;PRKAG1;COX6A1;NDUFC2-KCTD14;COX7C;UQCRFS1;COX8A;SDHC;NDUFC1;SDHD;SDHB;COX6B1;COX7A2L;NDUFS8;NDUFS7;NDUFS6;DDIT3;NDUFS5;NDUFS4;NDUFS3;NDUFS2;UQCRC2;ATF4;NDUFB9;NDUFB8;NDUFB7;NDUFB10;UQCRB;NDUFB6;NDUFB11;NDUFB5;NDUFB4;NDUFB3;NDUFB2;NDUFB1;COX7A2;UQCR11;UQCR10;COX5B;COX5A;CDC42;NDUFV3;CYC1;NDUFV2;NDUFV1;NDUFA9;NDUFA8;NDUFA7;NDUFA6;NDUFA5;NDUFA4;NDUFA3;NDUFA2;NDUF…
Turquoise	Reactome_2016.42	Ubiquitin-dependent degradation of Cyclin D1 Homo sapiens R-HSA-69229	37/50	2.99018e-30	7.25293e-29	33.1823	2255.8	PSMD10;PSMD12;PSMD14;PSMD13;PSMB10;PSMA7;PSMD8;PSMB6;PSMD9;PSMB7;PSMD6;PSMB4;PSMD7;PSMB5;PSMD4;UBB;PSMB2;PSMB3;PSMB1;RPS27A;PSMB8;PSMA5;PSMA6;PSMA3;PSMC5;PSMA4;PSMC6;PSMA1;PSMC3;PSMA2;PSMC4;CDK4;PSMC1;PSMC2;PSME1;PSME2;UBA52
Turquoise	Reactome_2016.43	Ubiquitin-dependent degradation of Cyclin D Homo sapiens R-HSA-75815	37/50	2.99018e-30	7.25293e-29	33.1823	2255.8	PSMD10;PSMD12;PSMD14;PSMD13;PSMB10;PSMA7;PSMD8;PSMB6;PSMD9;PSMB7;PSMD6;PSMB4;PSMD7;PSMB5;PSMD4;UBB;PSMB2;PSMB3;PSMB1;RPS27A;PSMB8;PSMA5;PSMA6;PSMA3;PSMC5;PSMA4;PSMC6;PSMA1;PSMC3;PSMA2;PSMC4;CDK4;PSMC1;PSMC2;PSME1;PSME2;UBA52
Turquoise	Reactome_2016.44	APC/C:Cdc20 mediated degradation of Securin Homo sapiens R-HSA-174154	42/66	6.65159e-30	1.57673e-28	20.4553	1374.24	PSMD10;PSMD12;ANAPC15;PSMD14;ANAPC16;PSMD13;PSMB10;PSMA7;ANAPC11;PSMD8;PSMB6;PSMD9;PSMB7;PSMD6;PSMB4;PSMD7;PSMB5;PSMD4;UBB;PSMB2;PSMB3;PSMB1;RPS27A;UBE2E1;PSMB8;PSMA5;PSMA6;PSMA3;PSMC5;PSMA4;PSMC6;PSMA1;PSMC3;PSMA2;PSMC4;PSMC1;PSMC2;CDC16;PSME1;ANAPC4;PSME2;UBA52
Turquoise	Reactome_2016.45	Vpu mediated degradation of CD4 Homo sapiens R-HSA-180534	37/51	1.00564e-29	2.33085e-28	30.8104	2057.19	PSMD10;PSMD12;PSMD14;PSMD13;PSMB10;PSMA7;PSMD8;PSMB6;PSMD9;PSMB7;PSMD6;PSMB4;PSMD7;PSMB5;PSMD4;UBB;PSMB2;PSMB3;PSMB1;RPS27A;SKP1;PSMB8;PSMA5;PSMA6;PSMA3;PSMC5;PSMA4;PSMC6;PSMA1;PSMC3;PSMA2;PSMC4;PSMC1;PSMC2;PSME1;PSME2;UBA52
Turquoise	Reactome_2016.46	Regulation of activated PAK-2p34 by proteasome mediated degradation Homo sapiens R-HSA-211733	36/49	2.80211e-29	6.23922e-28	32.265	2121.25	PSMD10;PSMD12;PSMD14;PSMD13;PSMB10;PSMA7;PSMD8;PSMB6;PSMD9;PSMB7;PSMD6;PSMB4;PSMD7;PSMB5;PSMD4;UBB;PSMB2;PSMB3;PSMB1;RPS27A;PSMB8;PSMA5;PSMA6;PSMA3;PSMC5;PSMA4;PSMC6;PSMA1;PSMC3;PSMA2;PSMC4;PSMC1;PSMC2;PSME1;PSME2;UBA52
Turquoise	Reactome_2016.47	Cdc20:Phospho-APC/C mediated degradation of Cyclin A Homo sapiens R-HSA-174184	43/71	2.81154e-29	6.23922e-28	17.9581	1180.59	PSMD10;PSMD12;ANAPC15;PSMD14;ANAPC16;PSMD13;PSMB10;PSMA7;ANAPC11;PSMD8;PSMB6;PSMD9;PSMB7;PSMD6;PSMB4;PSMD7;PSMB5;PSMD4;UBB;PSMB2;PSMB3;PSMB1;BUB3;RPS27A;UBE2E1;PSMB8;PSMA5;PSMA6;PSMA3;PSMC5;PSMA4;PSMC6;PSMA1;PSMC3;PSMA2;PSMC4;PSMC1;PSMC2;CDC16;PSME1;ANAPC4;PSME2;UBA52
Turquoise	WikiPathways_2019_Human.3	Nonalcoholic fatty liver disease WP4396	64/155	6.48373e-30	6.93759e-28	8.30698	558.298	NDUFA13;COX7B;NDUFA11;NDUFA12;COX4I1;PRKAG1;COX6A1;NDUFC2-KCTD14;COX7C;UQCRFS1;COX8A;SDHC;NDUFC1;SDHD;SDHB;COX6B1;COX7A2L;NDUFS8;NDUFS7;NDUFS6;DDIT3;NDUFS5;NDUFS4;NDUFS3;NDUFS2;UQCRC2;ATF4;NDUFB9;NDUFB8;NDUFB7;NDUFB10;UQCRB;NDUFB6;NDUFB11;NDUFB5;NDUFB4;NDUFB3;NDUFB2;NDUFB1;COX7A2;UQCR11;UQCR10;COX5B;COX5A;CDC42;NDUFV3;CYC1;NDUFV2;NDUFV1;NDUFA9;NDUFA8;NDUFA7;NDUFA6;NDUFA5;NDUFA4;NDUFA3;NDUFA2;NDUF…
Turquoise	Reactome_2016.48	APC:Cdc20 mediated degradation of cell cycle proteins prior to satisfation of the cell cycle checkpoint Homo sapiens R-HSA-179419	43/72	6.44398e-29	1.40022e-27	17.3379	1125.43	PSMD10;PSMD12;ANAPC15;PSMD14;ANAPC16;PSMD13;PSMB10;PSMA7;ANAPC11;PSMD8;PSMB6;PSMD9;PSMB7;PSMD6;PSMB4;PSMD7;PSMB5;PSMD4;UBB;PSMB2;PSMB3;PSMB1;BUB3;RPS27A;UBE2E1;PSMB8;PSMA5;PSMA6;PSMA3;PSMC5;PSMA4;PSMC6;PSMA1;PSMC3;PSMA2;PSMC4;PSMC1;PSMC2;CDC16;PSME1;ANAPC4;PSME2;UBA52
Turquoise	Reactome_2016.49	HIV Infection Homo sapiens R-HSA-162906	76/222	7.12629e-29	1.51688e-27	6.17782	400.392	GTF2B;PSMD8;PSMD9;PSMD6;PSMD7;PSMD4;BANF1;B2M;SKP1;NCBP2;VPS37D;GTF2F1;GTF2F2;RBX1;PSMA5;PSMA6;PSMA3;PSMA4;PSMA1;PSMA2;PSME1;PSME2;CHMP4B;CHMP6;UBA52;PPIA;CHMP7;SLC25A4;VPS28;CHMP5;PSMD10;PSMD12;GTF2A2;TSG101;PSMD14;PSMD13;TAF9;SUPT4H1;PSMA7;GTF2E2;PSMB10;PSMB6;PSMB7;PSMB4;PSMB5;PSMB2;UBB;PSMB3;PSMB1;POLR2D;AP2S1;ATP6V1H;POLR2F;NUP43;POLR2G;POLR2H;RPS27A;POLR2I;POLR2J;POLR2K;POLR2L;RANBP1;NPM1;TA…
Turquoise	Reactome_2016.50	CDK-mediated phosphorylation and removal of Cdc6 Homo sapiens R-HSA-69017	36/50	9.2392e-29	1.88951e-27	29.9587	1933.88	PSMD10;PSMD12;PSMD14;PSMD13;PSMB10;PSMA7;PSMD8;PSMB6;PSMD9;PSMB7;PSMD6;PSMB4;PSMD7;PSMB5;PSMD4;UBB;PSMB2;PSMB3;PSMB1;RPS27A;PSMB8;PSMA5;PSMA6;PSMA3;PSMC5;PSMA4;PSMC6;PSMA1;PSMC3;PSMA2;PSMC4;PSMC1;PSMC2;PSME1;PSME2;UBA52
Turquoise	Reactome_2016.51	Regulation of Apoptosis Homo sapiens R-HSA-169911	36/50	9.2392e-29	1.88951e-27	29.9587	1933.88	PSMD10;PSMD12;PSMD14;PSMD13;PSMB10;PSMA7;PSMD8;PSMB6;PSMD9;PSMB7;PSMD6;PSMB4;PSMD7;PSMB5;PSMD4;UBB;PSMB2;PSMB3;PSMB1;RPS27A;PSMB8;PSMA5;PSMA6;PSMA3;PSMC5;PSMA4;PSMC6;PSMA1;PSMC3;PSMA2;PSMC4;PSMC1;PSMC2;PSME1;PSME2;UBA52
Turquoise	Reactome_2016.52	Vif-mediated degradation of APOBEC3G Homo sapiens R-HSA-180585	37/53	9.8426e-29	1.9742e-27	26.9562	1738.36	PSMD10;PSMD12;PSMD14;PSMD13;PSMB10;PSMA7;PSMD8;PSMB6;PSMD9;PSMB7;PSMD6;PSMB4;PSMD7;PSMB5;PSMD4;UBB;PSMB2;PSMB3;PSMB1;RPS27A;PSMB8;RBX1;PSMA5;PSMA6;PSMA3;PSMC5;PSMA4;PSMC6;PSMA1;PSMC3;PSMA2;PSMC4;PSMC1;PSMC2;PSME1;PSME2;UBA52
Turquoise	GO_Biological_Process_2018.32	negative regulation of ubiquitin-protein ligase activity involved in mitotic cell cycle (GO:0051436)	43/71	2.81154e-29	2.63757e-27	17.9581	1180.59	PSMD10;PSMD12;ANAPC15;PSMD14;ANAPC16;PSMD13;PSMB10;PSMA7;ANAPC11;PSMD8;PSMB6;PSMD9;PSMB7;PSMD6;PSMB4;PSMD7;PSMB5;PSMD4;UBB;PSMB2;PSMB3;PSMB1;BUB3;RPS27A;UBE2E1;PSMB8;PSMA5;PSMA6;PSMA3;PSMC5;PSMA4;PSMC6;PSMA1;PSMC3;PSMA2;PSMC4;PSMC1;CDC16;PSMC2;PSME1;ANAPC4;PSME2;UBA52
Turquoise	GO_Biological_Process_2018.33	positive regulation of ubiquitin protein ligase activity (GO:1904668)	46/82	3.62582e-29	3.2984e-27	14.9639	979.942	PSMD10;RAB1A;PSMD12;ANAPC15;PSMD14;ANAPC16;PSMD13;PSMB10;PSMA7;ANAPC11;PSMD8;PSMB6;PSMD9;PSMB7;PSMD6;PSMB4;PSMD7;PSMB5;PSMD4;UBB;PSMB2;PSMB3;PSMB1;BUB3;RPS27A;SKP1;UBE2E1;PSMB8;PSMA5;PSMA6;PSMA3;PSMC5;PSMA4;PSMC6;PSMA1;PSMC3;PSMA2;UBE2S;PSMC4;PSMC1;PSMC2;CDC16;PSME1;ANAPC4;PSME2;UBA52
Turquoise	Reactome_2016.53	SCF-beta-TrCP mediated degradation of Emi1 Homo sapiens R-HSA-174113	37/54	2.88637e-28	5.60157e-27	25.3691	1608.72	PSMD10;PSMD12;PSMD14;PSMD13;PSMB10;PSMA7;PSMD8;PSMB6;PSMD9;PSMB7;PSMD6;PSMB4;PSMD7;PSMB5;PSMD4;UBB;PSMB2;PSMB3;PSMB1;RPS27A;SKP1;PSMB8;PSMA5;PSMA6;PSMA3;PSMC5;PSMA4;PSMC6;PSMA1;PSMC3;PSMA2;PSMC4;PSMC1;PSMC2;PSME1;PSME2;UBA52
Turquoise	Reactome_2016.54	Autodegradation of the E3 ubiquitin ligase COP1 Homo sapiens R-HSA-349425	36/51	2.90014e-28	5.60157e-27	27.9599	1772.87	PSMD10;PSMD12;PSMD14;PSMD13;PSMB10;PSMA7;PSMD8;PSMB6;PSMD9;PSMB7;PSMD6;PSMB4;PSMD7;PSMB5;PSMD4;UBB;PSMB2;PSMB3;PSMB1;RPS27A;PSMB8;PSMA5;PSMA6;PSMA3;PSMC5;PSMA4;PSMC6;PSMA1;PSMC3;PSMA2;PSMC4;PSMC1;PSMC2;PSME1;PSME2;UBA52
Turquoise	GO_Biological_Process_2018.34	regulation of ubiquitin-protein ligase activity involved in mitotic cell cycle (GO:0051439)	43/72	6.44398e-29	5.68966e-27	17.3379	1125.43	PSMD10;PSMD12;ANAPC15;PSMD14;ANAPC16;PSMD13;PSMB10;PSMA7;ANAPC11;PSMD8;PSMB6;PSMD9;PSMB7;PSMD6;PSMB4;PSMD7;PSMB5;PSMD4;UBB;PSMB2;PSMB3;PSMB1;BUB3;RPS27A;UBE2E1;PSMB8;PSMA5;PSMA6;PSMA3;PSMC5;PSMA4;PSMC6;PSMA1;PSMC3;PSMA2;PSMC4;PSMC1;PSMC2;CDC16;PSME1;ANAPC4;PSME2;UBA52
Turquoise	GO_Biological_Process_2018.35	negative regulation of G2/M transition of mitotic cell cycle (GO:0010972)	40/62	6.91234e-29	5.92881e-27	21.2275	1376.43	PSMD10;PSMD12;PSMD14;PSMD13;PINX1;PSMB10;PSMA7;PSMD8;PSMB6;PSMD9;PSMB7;PSMD6;PSMB4;PSMD7;PSMB5;PSMD4;UBB;PSMB2;PSMB3;PSMB1;RPS27A;CDK5RAP3;SKP1;PSMB8;RBX1;PSMA5;PSMA6;PSMA3;PSMC5;PSMA4;PSMC6;PSMA1;PSMC3;PSMA2;PSMC4;PSMC1;PSMC2;PSME1;PSME2;UBA52
Turquoise	Reactome_2016.55	APC/C:Cdc20 mediated degradation of mitotic proteins Homo sapiens R-HSA-176409	43/74	3.18989e-28	6.0492e-27	16.2175	1026.77	PSMD10;PSMD12;ANAPC15;PSMD14;ANAPC16;PSMD13;PSMB10;PSMA7;ANAPC11;PSMD8;PSMB6;PSMD9;PSMB7;PSMD6;PSMB4;PSMD7;PSMB5;PSMD4;UBB;PSMB2;PSMB3;PSMB1;BUB3;RPS27A;UBE2E1;PSMB8;PSMA5;PSMA6;PSMA3;PSMC5;PSMA4;PSMC6;PSMA1;PSMC3;PSMA2;PSMC4;PSMC1;PSMC2;CDC16;PSME1;ANAPC4;PSME2;UBA52
Turquoise	GO_Biological_Process_2018.36	positive regulation of ubiquitin-protein ligase activity involved in regulation of mitotic cell cycle transition (GO:0051437)	44/76	9.37819e-29	7.82037e-27	16.0855	1038.1	PSMD10;PSMD12;ANAPC15;PSMD14;ANAPC16;PSMD13;PSMB10;PSMA7;ANAPC11;PSMD8;PSMB6;PSMD9;PSMB7;PSMD6;PSMB4;PSMD7;PSMB5;PSMD4;UBB;PSMB2;PSMB3;PSMB1;BUB3;RPS27A;SKP1;UBE2E1;PSMB8;PSMA5;PSMA6;PSMA3;PSMC5;PSMA4;PSMC6;PSMA1;PSMC3;PSMA2;PSMC4;PSMC1;PSMC2;CDC16;PSME1;ANAPC4;PSME2;UBA52
Turquoise	Reactome_2016.56	APC/C:Cdh1 mediated degradation of Cdc20 and other APC/C:Cdh1 targeted proteins in late mitosis/early G1 Homo sapiens R-HSA-174178	42/71	4.88955e-28	9.10679e-27	16.9239	1064.26	PSMD10;PSMD12;ANAPC15;PSMD14;ANAPC16;PSMD13;PSMB10;PSMA7;ANAPC11;PSMD8;PSMB6;PSMD9;PSMB7;PSMD6;PSMB4;PSMD7;PSMB5;PSMD4;UBB;PSMB2;PSMB3;PSMB1;RPS27A;UBE2E1;PSMB8;PSMA5;PSMA6;PSMA3;PSMC5;PSMA4;PSMC6;PSMA1;PSMC3;PSMA2;PSMC4;PSMC1;PSMC2;CDC16;PSME1;ANAPC4;PSME2;UBA52
Turquoise	Reactome_2016.57	Activation of APC/C and APC/C:Cdc20 mediated degradation of mitotic proteins Homo sapiens R-HSA-176814	43/75	6.90178e-28	1.26291e-26	15.7099	982.506	PSMD10;PSMD12;ANAPC15;PSMD14;ANAPC16;PSMD13;PSMB10;PSMA7;ANAPC11;PSMD8;PSMB6;PSMD9;PSMB7;PSMD6;PSMB4;PSMD7;PSMB5;PSMD4;UBB;PSMB2;PSMB3;PSMB1;BUB3;RPS27A;UBE2E1;PSMB8;PSMA5;PSMA6;PSMA3;PSMC5;PSMA4;PSMC6;PSMA1;PSMC3;PSMA2;PSMC4;PSMC1;PSMC2;CDC16;PSME1;ANAPC4;PSME2;UBA52
Turquoise	Reactome_2016.58	Hh mutants that don't undergo autocatalytic processing are degraded by ERAD Homo sapiens R-HSA-5362768	37/55	8.14217e-28	1.46419e-26	23.9584	1494.42	PSMD10;PSMD12;PSMD14;PSMD13;PSMB10;PSMA7;PSMD8;PSMB6;PSMD9;PSMB7;SHH;PSMD6;PSMB4;PSMD7;PSMB5;PSMD4;UBB;PSMB2;PSMB3;PSMB1;RPS27A;PSMB8;PSMA5;PSMA6;PSMA3;PSMC5;PSMA4;PSMC6;PSMA1;PSMC3;PSMA2;PSMC4;PSMC1;PSMC2;PSME1;PSME2;UBA52
Turquoise	Reactome_2016.59	p53-Independent DNA Damage Response Homo sapiens R-HSA-69610	36/52	8.70177e-28	1.48786e-26	26.211	1633.18	PSMD10;PSMD12;PSMD14;PSMD13;PSMB10;PSMA7;PSMD8;PSMB6;PSMD9;PSMB7;PSMD6;PSMB4;PSMD7;PSMB5;PSMD4;UBB;PSMB2;PSMB3;PSMB1;RPS27A;PSMB8;PSMA5;PSMA6;PSMA3;PSMC5;PSMA4;PSMC6;PSMA1;PSMC3;PSMA2;PSMC4;PSMC1;PSMC2;PSME1;PSME2;UBA52
Turquoise	Reactome_2016.60	p53-Independent G1/S DNA damage checkpoint Homo sapiens R-HSA-69613	36/52	8.70177e-28	1.48786e-26	26.211	1633.18	PSMD10;PSMD12;PSMD14;PSMD13;PSMB10;PSMA7;PSMD8;PSMB6;PSMD9;PSMB7;PSMD6;PSMB4;PSMD7;PSMB5;PSMD4;UBB;PSMB2;PSMB3;PSMB1;RPS27A;PSMB8;PSMA5;PSMA6;PSMA3;PSMC5;PSMA4;PSMC6;PSMA1;PSMC3;PSMA2;PSMC4;PSMC1;PSMC2;PSME1;PSME2;UBA52
Turquoise	Reactome_2016.61	Ubiquitin Mediated Degradation of Phosphorylated Cdc25A Homo sapiens R-HSA-69601	36/52	8.70177e-28	1.48786e-26	26.211	1633.18	PSMD10;PSMD12;PSMD14;PSMD13;PSMB10;PSMA7;PSMD8;PSMB6;PSMD9;PSMB7;PSMD6;PSMB4;PSMD7;PSMB5;PSMD4;UBB;PSMB2;PSMB3;PSMB1;RPS27A;PSMB8;PSMA5;PSMA6;PSMA3;PSMC5;PSMA4;PSMC6;PSMA1;PSMC3;PSMA2;PSMC4;PSMC1;PSMC2;PSME1;PSME2;UBA52
Turquoise	Reactome_2016.62	Regulation of APC/C activators between G1/S and early anaphase Homo sapiens R-HSA-176408	44/79	8.91438e-28	1.49963e-26	14.7043	915.855	PSMD10;PSMD12;ANAPC15;PSMD14;ANAPC16;PSMD13;PSMB10;PSMA7;ANAPC11;PSMD8;PSMB6;PSMD9;PSMB7;PSMD6;PSMB4;PSMD7;PSMB5;PSMD4;UBB;PSMB2;PSMB3;PSMB1;BUB3;RPS27A;SKP1;UBE2E1;PSMB8;PSMA5;PSMA6;PSMA3;PSMC5;PSMA4;PSMC6;PSMA1;PSMC3;PSMA2;PSMC4;PSMC1;PSMC2;CDC16;PSME1;ANAPC4;PSME2;UBA52
Turquoise	WikiPathways_2019_Human.4	Oxidative phosphorylation WP623	39/60	2.20997e-28	1.7735e-26	21.6698	1379.92	NDUFB9;NDUFB8;NDUFB7;NDUFA11;NDUFB6;NDUFB10;NDUFB5;NDUFB4;NDUFB2;NDUFB1;ATP5MC3;ATP5F1B;NDUFV3;NDUFV2;NDUFV1;ATP5MF;ATP5ME;NDUFA9;NDUFA8;ATP5PF;NDUFA7;NDUFA6;ATP5PD;NDUFA5;NDUFA4;ATP5PB;NDUFA3;NDUFA2;NDUFC1;ATP5F1E;NDUFS8;NDUFS7;NDUFS6;NDUFS5;NDUFS4;NDUFAB1;NDUFS3;ATP5PO;NDUFS2
Turquoise	Reactome_2016.63	Organelle biogenesis and maintenance Homo sapiens R-HSA-1852241	92/326	1.81629e-27	2.83508e-26	4.69236	288.923	MRPS15;MRPS16;MRPS14;CETN2;MRPS11;PRKAG1;MRPL39;MRPS10;MRPL36;MRPL34;MRPL32;MRPL33;MRPL41;MRPL42;MRPL3;MRPL2;MRPL40;TUBA1A;MRPL1;MRPL9;CHCHD1;RAB8A;CCT3;MRPS28;IQCB1;CCT2;TSFM;MRPS26;HSP90AA1;MRPS24;MRPS22;MRPS23;MRPL49;MRPS21;MRPL48;MRPS7;DYNLL1;MRPL45;MRPL46;MRPL43;MRPS18C;SIRT3;MRPL44;MRPL52;MRPL53;MRPS9;MRPL50;MRPL51;TMEM216;TCP1;TFAM;AURKAIP1;DAP3;DYNC1I2;MRPS36;MRPL18;SSNA1;MRPS33;ARL3;DCTN…
Turquoise	Reactome_2016.64	Degradation of GLI1 by the proteasome Homo sapiens R-HSA-5610780	38/59	1.82119e-27	2.83508e-26	21.1008	1299.18	PSMD10;PSMD12;PSMD14;PSMD13;PSMB10;PSMA7;PSMD8;PSMB6;PSMD9;PSMB7;PSMD6;PSMB4;PSMD7;PSMB5;PSMD4;UBB;PSMB2;PSMB3;PSMB1;RPS27A;SKP1;PSMB8;RBX1;PSMA5;PSMA6;PSMA3;PSMC5;PSMA4;PSMC6;PSMA1;PSMC3;PSMA2;PSMC4;PSMC1;PSMC2;PSME1;PSME2;UBA52
Turquoise	Reactome_2016.65	GLI3 is processed to GLI3R by the proteasome Homo sapiens R-HSA-5610785	38/59	1.82119e-27	2.83508e-26	21.1008	1299.18	PSMD10;PSMD12;PSMD14;PSMD13;PSMB10;PSMA7;PSMD8;PSMB6;PSMD9;PSMB7;PSMD6;PSMB4;PSMD7;PSMB5;PSMD4;UBB;PSMB2;PSMB3;PSMB1;RPS27A;SKP1;PSMB8;RBX1;PSMA5;PSMA6;PSMA3;PSMC5;PSMA4;PSMC6;PSMA1;PSMC3;PSMA2;PSMC4;PSMC1;PSMC2;PSME1;PSME2;UBA52
Turquoise	Reactome_2016.66	Degradation of GLI2 by the proteasome Homo sapiens R-HSA-5610783	38/59	1.82119e-27	2.83508e-26	21.1008	1299.18	PSMD10;PSMD12;PSMD14;PSMD13;PSMB10;PSMA7;PSMD8;PSMB6;PSMD9;PSMB7;PSMD6;PSMB4;PSMD7;PSMB5;PSMD4;UBB;PSMB2;PSMB3;PSMB1;RPS27A;SKP1;PSMB8;RBX1;PSMA5;PSMA6;PSMA3;PSMC5;PSMA4;PSMC6;PSMA1;PSMC3;PSMA2;PSMC4;PSMC1;PSMC2;PSME1;PSME2;UBA52
Turquoise	Reactome_2016.67	SCF(Skp2)-mediated degradation of p27/p21 Homo sapiens R-HSA-187577	38/59	1.82119e-27	2.83508e-26	21.1008	1299.18	PSMD10;PSMD12;PSMD14;PSMD13;PSMB10;PSMA7;PSMD8;PSMB6;PSMD9;PSMB7;PSMD6;PSMB4;PSMD7;PSMB5;PSMD4;UBB;PSMB2;PSMB3;PSMB1;RPS27A;SKP1;PSMB8;PSMA5;PSMA6;PSMA3;PSMC5;PSMA4;PSMC6;PSMA1;PSMC3;PSMA2;PSMC4;CDK4;PSMC1;PSMC2;PSME1;PSME2;UBA52
Turquoise	Reactome_2016.68	Degradation of DVL Homo sapiens R-HSA-4641258	37/56	2.2155e-27	3.39818e-26	22.6962	1392.97	PSMD10;PSMD12;PSMD14;PSMD13;PSMB10;PSMA7;PSMD8;PSMB6;PSMD9;PSMB7;PSMD6;PSMB4;PSMD7;PSMB5;PSMD4;UBB;PSMB2;PSMB3;PSMB1;RPS27A;PSMB8;RBX1;PSMA5;PSMA6;PSMA3;PSMC5;PSMA4;PSMC6;PSMA1;PSMC3;PSMA2;PSMC4;PSMC1;PSMC2;PSME1;PSME2;UBA52
Turquoise	Reactome_2016.69	Regulation of ornithine decarboxylase (ODC) Homo sapiens R-HSA-350562	35/50	2.59111e-27	3.91671e-26	27.166	1663.04	PSMD10;PSMD12;PSMD14;PSMD13;OAZ1;OAZ2;PSMB10;PSMA7;PSMD8;PSMB6;PSMD9;PSMB7;PSMD6;PSMB4;PSMD7;PSMB5;PSMD4;PSMB2;PSMB3;PSMB1;PSMB8;PSMA5;PSMA6;PSMA3;PSMC5;PSMA4;PSMC6;PSMA1;PSMC3;PSMA2;PSMC4;PSMC1;PSMC2;PSME1;PSME2
Turquoise	GO_Biological_Process_2018.37	anaphase-promoting complex-dependent catabolic process (GO:0031145)	44/79	8.91438e-28	7.23269e-26	14.7043	915.855	PSMD10;PSMD12;ANAPC15;PSMD14;ANAPC16;PSMD13;PSMB10;PSMA7;ANAPC11;PSMD8;PSMB6;PSMD9;PSMB7;PSMD6;PSMB4;PSMD7;PSMB5;PSMD4;UBB;PSMB2;PSMB3;PSMB1;BUB3;RPS27A;UBE2E1;PSMB8;PSMA5;PSMA6;PSMA3;PSMC5;PSMA4;PSMC6;PSMA1;PSMC3;PSMA2;UBE2S;PSMC4;PSMC1;PSMC2;CDC16;PSME1;ANAPC4;PSME2;UBA52
Turquoise	Reactome_2016.70	Hh mutants abrogate ligand secretion Homo sapiens R-HSA-5387390	37/57	5.82923e-27	8.68556e-26	21.5602	1302.39	PSMD10;PSMD12;PSMD14;PSMD13;PSMB10;PSMA7;PSMD8;PSMB6;PSMD9;PSMB7;SHH;PSMD6;PSMB4;PSMD7;PSMB5;PSMD4;UBB;PSMB2;PSMB3;PSMB1;RPS27A;PSMB8;PSMA5;PSMA6;PSMA3;PSMC5;PSMA4;PSMC6;PSMA1;PSMC3;PSMA2;PSMC4;PSMC1;PSMC2;PSME1;PSME2;UBA52
Turquoise	Reactome_2016.71	Stabilization of p53 Homo sapiens R-HSA-69541	36/54	6.93686e-27	9.91116e-26	23.2961	1403.19	PSMD10;PSMD12;PSMD14;PSMD13;PSMB10;PSMA7;PSMD8;PSMB6;PSMD9;PSMB7;PSMD6;PSMB4;PSMD7;PSMB5;PSMD4;UBB;PSMB2;PSMB3;PSMB1;RPS27A;PSMB8;PSMA5;PSMA6;PSMA3;PSMC5;PSMA4;PSMC6;PSMA1;PSMC3;PSMA2;PSMC4;PSMC1;PSMC2;PSME1;PSME2;UBA52
Turquoise	Reactome_2016.72	AUF1 (hnRNP D0) binds and destabilizes mRNA Homo sapiens R-HSA-450408	36/54	6.93686e-27	9.91116e-26	23.2961	1403.19	PSMD10;PSMD12;PSMD14;PSMD13;PSMB10;PSMA7;PSMD8;PSMB6;PSMD9;PSMB7;PSMD6;PSMB4;PSMD7;PSMB5;PSMD4;UBB;PSMB2;PSMB3;PSMB1;RPS27A;PSMB8;PSMA5;PSMA6;PSMA3;PSMC5;PSMA4;PSMC6;PSMA1;PSMC3;PSMA2;PSMC4;PSMC1;PSMC2;PSME1;PSME2;UBA52
Turquoise	Reactome_2016.73	Degradation of AXIN Homo sapiens R-HSA-4641257	36/54	6.93686e-27	9.91116e-26	23.2961	1403.19	PSMD10;PSMD12;PSMD14;PSMD13;PSMB10;PSMA7;PSMD8;PSMB6;PSMD9;PSMB7;PSMD6;PSMB4;PSMD7;PSMB5;PSMD4;UBB;PSMB2;PSMB3;PSMB1;RPS27A;PSMB8;PSMA5;PSMA6;PSMA3;PSMC5;PSMA4;PSMC6;PSMA1;PSMC3;PSMA2;PSMC4;PSMC1;PSMC2;PSME1;PSME2;UBA52
Turquoise	WikiPathways_2019_Human.5	Mitochondrial complex I assembly model OXPHOS system WP4324	37/56	2.2155e-27	1.42235e-25	22.6962	1392.97	NDUFB9;NDUFA13;NDUFB8;NDUFB7;NDUFB6;NDUFB10;DMAC1;NDUFA12;NDUFB11;NDUFB5;NDUFB4;NDUFB3;NDUFB2;NDUFB1;TMEM70;NDUFV3;NDUFV2;NDUFV1;NDUFA8;NDUFA7;TIMMDC1;NDUFA6;NDUFA5;NDUFA3;NDUFA2;NDUFA1;NDUFC1;NDUFS6;NDUFAF7;NDUFS5;NDUFS4;NDUFAB1;NDUFS3;NDUFAF2;NDUFS2;NDUFAF3;TMEM126B
Turquoise	Reactome_2016.74	NIK-->noncanonical NF-kB signaling Homo sapiens R-HSA-5676590	37/58	1.48633e-26	2.09492e-25	20.5325	1221.08	PSMD10;PSMD12;PSMD14;PSMD13;PSMB10;PSMA7;PSMD8;PSMB6;PSMD9;PSMB7;PSMD6;PSMB4;PSMD7;PSMB5;PSMD4;UBB;PSMB2;PSMB3;PSMB1;RPS27A;SKP1;PSMB8;PSMA5;PSMA6;PSMA3;PSMC5;PSMA4;PSMC6;PSMA1;PSMC3;PSMA2;PSMC4;PSMC1;PSMC2;PSME1;PSME2;UBA52
Turquoise	KEGG_2019_Human.8	Proteasome	33/45	6.72842e-27	2.2372e-25	31.9818	1927.33	PSMD12;PSMD14;PSMD13;POMP;PSMA7;PSMB10;PSMD8;PSMB6;PSMB7;PSMB4;PSMD6;PSMD7;PSMB5;PSMD4;PSMB2;PSMB3;PSMB1;PSMB8;PSMA5;SEM1;PSMA6;PSMC5;PSMA3;PSMC6;PSMA4;PSMC3;PSMA1;PSMC4;PSMA2;PSMC1;PSMC2;PSME1;PSME2
Turquoise	Reactome_2016.75	ER-Phagosome pathway Homo sapiens R-HSA-1236974	39/65	1.86075e-26	2.58769e-25	17.4978	1036.68	PSMD10;PSMD12;PSMD14;PSMD13;PSMB10;PSMA7;PSMD8;PSMB6;PSMD9;PSMB7;PSMD6;PSMB4;PSMD7;PSMB5;PSMD4;UBB;PSMB2;PSMB3;SEC61G;PSMB1;SEC61B;RPS27A;B2M;PSMB8;PSMA5;PSMA6;PSMA3;PSMC5;PSMA4;PSMC6;PSMA1;PSMC3;PSMA2;PSMC4;PSMC1;PSMC2;PSME1;PSME2;UBA52
Turquoise	Reactome_2016.76	The role of GTSE1 in G2/M progression after G2 checkpoint Homo sapiens R-HSA-8852276	37/59	3.67992e-26	5.05021e-25	19.5981	1147.75	PSMD10;PSMD12;PSMD14;PSMD13;PSMB10;PSMA7;PSMD8;PSMB6;PSMD9;PSMB7;PSMD6;PSMB4;PSMD7;PSMB5;PSMD4;UBB;PSMB2;PSMB3;PSMB1;RPS27A;HSP90AA1;PSMB8;PSMA5;PSMA6;PSMA3;PSMC5;PSMA4;PSMC6;PSMA1;PSMC3;PSMA2;PSMC4;PSMC1;PSMC2;PSME1;PSME2;UBA52
Turquoise	GO_Biological_Process_2018.38	regulation of cellular amine metabolic process (GO:0033238)	35/51	7.62515e-27	5.86941e-25	25.4668	1531.53	PSMD10;PSMD12;PSMD14;PSMD13;OAZ1;OAZ2;PSMB10;PSMA7;PSMD8;PSMB6;PSMD9;PSMB7;PSMD6;PSMB4;PSMD7;PSMB5;PSMD4;PSMB2;PSMB3;PSMB1;PSMB8;PSMA5;PSMA6;PSMA3;PSMC5;PSMA4;PSMC6;PSMA1;PSMC3;PSMA2;PSMC4;PSMC1;PSMC2;PSME1;PSME2
Turquoise	GO_Biological_Process_2018.39	regulation of cellular amino acid metabolic process (GO:0006521)	35/51	7.62515e-27	5.86941e-25	25.4668	1531.53	PSMD10;PSMD12;PSMD14;PSMD13;OAZ1;OAZ2;PSMB10;PSMA7;PSMD8;PSMB6;PSMD9;PSMB7;PSMD6;PSMB4;PSMD7;PSMB5;PSMD4;PSMB2;PSMB3;PSMB1;PSMB8;PSMA5;PSMA6;PSMA3;PSMC5;PSMA4;PSMC6;PSMA1;PSMC3;PSMA2;PSMC4;PSMC1;PSMC2;PSME1;PSME2
Turquoise	Reactome_2016.77	APC/C-mediated degradation of cell cycle proteins Homo sapiens R-HSA-174143	44/85	5.3664e-26	7.17584e-25	12.5484	730.153	PSMD10;PSMD12;ANAPC15;PSMD14;ANAPC16;PSMD13;PSMB10;PSMA7;ANAPC11;PSMD8;PSMB6;PSMD9;PSMB7;PSMD6;PSMB4;PSMD7;PSMB5;PSMD4;UBB;PSMB2;PSMB3;PSMB1;BUB3;RPS27A;SKP1;UBE2E1;PSMB8;PSMA5;PSMA6;PSMA3;PSMC5;PSMA4;PSMC6;PSMA1;PSMC3;PSMA2;PSMC4;PSMC1;PSMC2;CDC16;PSME1;ANAPC4;PSME2;UBA52
Turquoise	Reactome_2016.78	Regulation of mitotic cell cycle Homo sapiens R-HSA-453276	44/85	5.3664e-26	7.17584e-25	12.5484	730.153	PSMD10;PSMD12;ANAPC15;PSMD14;ANAPC16;PSMD13;PSMB10;PSMA7;ANAPC11;PSMD8;PSMB6;PSMD9;PSMB7;PSMD6;PSMB4;PSMD7;PSMB5;PSMD4;UBB;PSMB2;PSMB3;PSMB1;BUB3;RPS27A;SKP1;UBE2E1;PSMB8;PSMA5;PSMA6;PSMA3;PSMC5;PSMA4;PSMC6;PSMA1;PSMC3;PSMA2;PSMC4;PSMC1;PSMC2;CDC16;PSME1;ANAPC4;PSME2;UBA52
Turquoise	GO_Biological_Process_2018.40	positive regulation of protein ubiquitination involved in ubiquitin-dependent protein catabolic process (GO:2000060)	45/87	1.54203e-26	1.15729e-24	12.5353	745.025	PSMD10;PSMD12;ANAPC15;PSMD14;ANAPC16;PSMD13;MAGEF1;PSMB10;PSMA7;ANAPC11;PSMD8;PSMB6;PSMD9;PSMB7;PSMD6;PSMB4;PSMD7;PSMB5;PSMD4;UBB;PSMB2;PSMB3;PSMB1;BUB3;RPS27A;SKP1;UBE2E1;PSMB8;PSMA5;PSMA6;PSMA3;PSMC5;PSMA4;PSMC6;PSMA1;PSMC3;PSMA2;PSMC4;PSMC1;PSMC2;CDC16;PSME1;ANAPC4;PSME2;UBA52
Turquoise	Reactome_2016.79	Hedgehog ligand biogenesis Homo sapiens R-HSA-5358346	38/64	1.41552e-25	1.86884e-24	17.0383	974.882	PSMD10;PSMD12;PSMD14;PSMD13;PSMB10;PSMA7;PSMD8;PSMB6;PSMD9;PSMB7;SHH;PSMD6;PSMB4;PSMD7;PSMB5;PSMD4;UBB;PSMB2;PSMB3;PSMB1;RPS27A;PSMB8;PSMA5;PSMA6;PSMA3;PSMC5;PSMA4;PSMC6;PSMA1;PSMC3;PSMA2;PSMC4;PSMC1;PSMC2;PSME1;PSME2;P4HB;UBA52
Turquoise	GO_Biological_Process_2018.41	negative regulation of cell cycle G2/M phase transition (GO:1902750)	40/69	2.7304e-26	1.99918e-24	16.0975	947.544	PSMD10;PSMD12;PSMD14;PSMD13;PINX1;PSMB10;PSMA7;PSMD8;BABAM1;PSMB6;PSMD9;PSMB7;PSMD6;PSMB4;PSMD7;PSMB5;PSMD4;UBB;PSMB2;PSMB3;PSMB1;RPS27A;SKP1;PSMB8;RBX1;PSMA5;PSMA6;PSMA3;PSMC5;PSMA4;PSMC6;PSMA1;PSMC3;PSMA2;PSMC4;PSMC1;PSMC2;PSME1;PSME2;UBA52
Turquoise	Reactome_2016.80	Dectin-1 mediated noncanonical NF-kB signaling Homo sapiens R-HSA-5607761	37/61	2.07954e-25	2.71121e-24	17.963	1020.88	PSMD10;PSMD12;PSMD14;PSMD13;PSMB10;PSMA7;PSMD8;PSMB6;PSMD9;PSMB7;PSMD6;PSMB4;PSMD7;PSMB5;PSMD4;UBB;PSMB2;PSMB3;PSMB1;RPS27A;SKP1;PSMB8;PSMA5;PSMA6;PSMA3;PSMC5;PSMA4;PSMC6;PSMA1;PSMC3;PSMA2;PSMC4;PSMC1;PSMC2;PSME1;PSME2;UBA52
Turquoise	Reactome_2016.81	CDT1 association with the CDC6:ORC:origin complex Homo sapiens R-HSA-68827	36/58	2.92279e-25	3.76355e-24	19.0563	1076.53	PSMD10;PSMD12;PSMD14;PSMD13;PSMB10;PSMA7;PSMD8;PSMB6;PSMD9;PSMB7;PSMD6;PSMB4;PSMD7;PSMB5;PSMD4;UBB;PSMB2;PSMB3;PSMB1;RPS27A;PSMB8;PSMA5;PSMA6;PSMA3;PSMC5;PSMA4;PSMC6;PSMA1;PSMC3;PSMA2;PSMC4;PSMC1;PSMC2;PSME1;PSME2;UBA52
Turquoise	GO_Biological_Process_2018.42	regulation of transcription from RNA polymerase II promoter in response to hypoxia (GO:0061418)	42/78	8.84164e-26	6.31967e-24	13.6279	786.165	PSMD10;PSMD12;PSMD14;PSMD13;UBE2D2;HIGD1A;PSMB10;PSMA7;PSMD8;PSMB6;PSMD9;PSMB7;PSMD6;PSMB4;PSMD7;PSMB5;PSMD4;UBB;PSMB2;PSMB3;PSMB1;ELOB;ELOC;RPS27A;EGLN2;PSMB8;RBX1;PSMA5;PSMA6;PSMA3;PSMC5;PSMA4;PSMC6;PSMA1;PSMC3;PSMA2;PSMC4;PSMC1;PSMC2;PSME1;PSME2;UBA52
Turquoise	Reactome_2016.82	Cross-presentation of soluble exogenous antigens (endosomes) Homo sapiens R-HSA-1236978	33/49	5.69189e-25	7.23981e-24	23.9811	1338.76	PSMD10;PSMD12;PSMD14;PSMD13;PSMB10;PSMA7;PSMD8;PSMB6;PSMD9;PSMB7;PSMD6;PSMB4;PSMD7;PSMB5;PSMD4;PSMB2;PSMB3;PSMB1;PSMB8;PSMA5;PSMA6;PSMA3;PSMC5;PSMA4;PSMC6;PSMA1;PSMC3;PSMA2;PSMC4;PSMC1;PSMC2;PSME1;PSME2
Turquoise	Reactome_2016.83	p53-Dependent G1/S DNA damage checkpoint Homo sapiens R-HSA-69580	37/63	1.06506e-24	1.30689e-23	16.5794	915.166	PSMD10;PSMD12;PSMD14;PSMD13;PSMB10;PSMA7;PSMD8;PSMB6;PSMD9;PSMB7;PSMD6;PSMB4;PSMD7;PSMB5;PSMD4;UBB;PSMB2;PCBP4;PSMB3;PSMB1;RPS27A;PSMB8;PSMA5;PSMA6;PSMA3;PSMC5;PSMA4;PSMC6;PSMA1;PSMC3;PSMA2;PSMC4;PSMC1;PSMC2;PSME1;PSME2;UBA52
Turquoise	Reactome_2016.84	p53-Dependent G1 DNA Damage Response Homo sapiens R-HSA-69563	37/63	1.06506e-24	1.30689e-23	16.5794	915.166	PSMD10;PSMD12;PSMD14;PSMD13;PSMB10;PSMA7;PSMD8;PSMB6;PSMD9;PSMB7;PSMD6;PSMB4;PSMD7;PSMB5;PSMD4;UBB;PSMB2;PCBP4;PSMB3;PSMB1;RPS27A;PSMB8;PSMA5;PSMA6;PSMA3;PSMC5;PSMA4;PSMC6;PSMA1;PSMC3;PSMA2;PSMC4;PSMC1;PSMC2;PSME1;PSME2;UBA52
Turquoise	Reactome_2016.85	Asymmetric localization of PCP proteins Homo sapiens R-HSA-4608870	37/63	1.06506e-24	1.30689e-23	16.5794	915.166	PSMD10;PSMD12;PSMD14;PSMD13;PSMB10;PSMA7;PSMD8;PSMB6;PSMD9;PSMB7;PSMD6;PSMB4;PSMD7;PARD6A;PSMB5;PSMD4;UBB;PSMB2;PSMB3;PSMB1;RPS27A;PSMB8;PSMA5;PSMA6;PSMA3;PSMC5;PSMA4;PSMC6;PSMA1;PSMC3;PSMA2;PSMC4;PSMC1;PSMC2;PSME1;PSME2;UBA52
Turquoise	Reactome_2016.86	Regulation of RAS by GAPs Homo sapiens R-HSA-5658442	38/67	1.46011e-24	1.77081e-23	15.2732	838.248	PSMD10;PSMD12;PSMD14;PSMD13;PSMB10;PSMA7;PSMD8;PSMB6;PSMD9;PSMB7;PSMD6;PSMB4;PSMD7;PSMB5;PSMD4;UBB;PSMB2;PSMB3;PSMB1;RPS27A;HRAS;PSMB8;RBX1;PSMA5;PSMA6;PSMA3;PSMC5;PSMA4;PSMC6;PSMA1;PSMC3;PSMA2;PSMC4;PSMC1;PSMC2;PSME1;PSME2;UBA52
Turquoise	GO_Biological_Process_2018.43	SCF-dependent proteasomal ubiquitin-dependent protein catabolic process (GO:0031146)	40/72	2.58294e-25	1.80325e-23	14.586	825.796	PSMD10;PSMD12;PSMD14;PSMD13;RNF7;PSMB10;PSMA7;PSMD8;PSMB6;PSMD9;PSMB7;PSMD6;PSMB4;PSMD7;PSMB5;PSMD4;UBB;PSMB2;PSMB3;PSMB1;FBXO6;RPS27A;SKP1;PSMB8;RBX1;PSMA5;PSMA6;PSMA3;PSMC5;PSMA4;PSMC6;PSMA1;PSMC3;PSMA2;PSMC4;PSMC1;PSMC2;PSME1;PSME2;UBA52
Turquoise	WikiPathways_2019_Human.6	Proteasome Degradation WP183	37/62	4.76116e-25	2.54722e-23	17.2435	965.707	PSMD10;PSMD12;PSMD13;UBE2D2;RPN1;PSMB10;PSMA7;PSMD8;PSMB6;PSMD9;PSMB7;PSMD6;PSMB4;PSMD7;PSMB5;PSMD4;UBB;PSMB2;PSMB3;PSMB1;UBE2B;UCHL3;PSMB8;PSMA5;PSMA6;PSMA3;PSMC5;PSMA4;PSMC6;PSMA1;PSMC3;PSMA2;PSMC4;PSMC1;PSMC2;PSME1;PSME2
Turquoise	Reactome_2016.87	Cyclin E associated events during G1/S transition Homo sapiens R-HSA-69202	38/68	3.05535e-24	3.66291e-23	14.7633	799.361	PSMD10;PSMD12;PSMD14;PSMD13;PSMB10;PSMA7;PSMD8;PSMB6;PSMD9;PSMB7;PSMD6;PSMB4;PSMD7;PSMB5;PSMD4;UBB;PSMB2;PSMB3;PSMB1;RPS27A;SKP1;PSMB8;PSMA5;PSMA6;PSMA3;PSMC5;PSMA4;PSMC6;PSMA1;PSMC3;PSMA2;PSMC4;CDK4;PSMC1;PSMC2;PSME1;PSME2;UBA52
Turquoise	Reactome_2016.88	G1/S DNA Damage Checkpoints Homo sapiens R-HSA-69615	37/65	4.99494e-24	5.92014e-23	15.3935	825.915	PSMD10;PSMD12;PSMD14;PSMD13;PSMB10;PSMA7;PSMD8;PSMB6;PSMD9;PSMB7;PSMD6;PSMB4;PSMD7;PSMB5;PSMD4;UBB;PSMB2;PCBP4;PSMB3;PSMB1;RPS27A;PSMB8;PSMA5;PSMA6;PSMA3;PSMC5;PSMA4;PSMC6;PSMA1;PSMC3;PSMA2;PSMC4;PSMC1;PSMC2;PSME1;PSME2;UBA52
Turquoise	Reactome_2016.89	Cyclin A:Cdk2-associated events at S phase entry Homo sapiens R-HSA-69656	38/69	6.27818e-24	7.35747e-23	14.2863	763.244	PSMD10;PSMD12;PSMD14;PSMD13;PSMB10;PSMA7;PSMD8;PSMB6;PSMD9;PSMB7;PSMD6;PSMB4;PSMD7;PSMB5;PSMD4;UBB;PSMB2;PSMB3;PSMB1;RPS27A;SKP1;PSMB8;PSMA5;PSMA6;PSMA3;PSMC5;PSMA4;PSMC6;PSMA1;PSMC3;PSMA2;PSMC4;CDK4;PSMC1;PSMC2;PSME1;PSME2;UBA52
Turquoise	Reactome_2016.90	Activation of NF-kappaB in B cells Homo sapiens R-HSA-1169091	37/66	1.04947e-23	1.21622e-22	14.8619	786.358	PSMD10;PSMD12;PSMD14;PSMD13;PSMB10;PSMA7;PSMD8;PSMB6;PSMD9;PSMB7;PSMD6;PSMB4;PSMD7;PSMB5;PSMD4;UBB;PSMB2;PSMB3;PSMB1;RPS27A;SKP1;PSMB8;PSMA5;PSMA6;PSMA3;PSMC5;PSMA4;PSMC6;PSMA1;PSMC3;PSMA2;PSMC4;PSMC1;PSMC2;PSME1;PSME2;UBA52
Turquoise	Reactome_2016.91	PCP/CE pathway Homo sapiens R-HSA-4086400	43/91	2.21768e-23	2.54181e-22	10.4641	545.84	PSMD10;PSMD12;PSMD14;PSMD13;CLTB;CLTA;ARRB2;PSMB10;PSMA7;PSMD8;PSMB6;PSMD9;PSMB7;PSMD6;PSMB4;PSMD7;PARD6A;PSMB5;PSMD4;UBB;PSMB2;PSMB3;PSMB1;AP2S1;RAC3;RPS27A;PSMB8;PSMA5;PSMA6;PSMA3;PSMC5;PSMA4;PSMC6;PSMA1;PSMC3;PSMA2;PSMC4;PSMC1;PSMC2;PSME1;PSME2;PFN1;UBA52
Turquoise	Reactome_2016.92	Regulation of mRNA stability by proteins that bind AU-rich elements Homo sapiens R-HSA-450531	41/86	1.52758e-22	1.73181e-21	10.6308	534.018	PSMD10;PSMD12;SET;PSMD14;ANP32A;PSMD13;PSMB10;PSMA7;PSMD8;EXOSC7;PSMB6;PSMD9;PSMB7;PSMD6;PSMB4;PSMD7;PSMB5;PSMD4;UBB;PSMB2;PSMB3;EXOSC9;PSMB1;RPS27A;EXOSC2;PSMB8;PSMA5;PSMA6;PSMA3;PSMC5;PSMA4;PSMC6;PSMA1;PSMC3;PSMA2;PSMC4;PSMC1;PSMC2;PSME1;PSME2;UBA52
Turquoise	Reactome_2016.93	Antigen processing-Cross presentation Homo sapiens R-HSA-1236975	40/82	1.68809e-22	1.89321e-21	11.1071	556.834	PSMD10;PSMD12;PSMD14;PSMD13;PSMB10;PSMA7;PSMD8;PSMB6;PSMD9;PSMB7;PSMD6;PSMB4;PSMD7;PSMB5;PSMD4;UBB;PSMB2;PSMB3;SEC61G;PSMB1;SEC61B;RPS27A;B2M;CYBA;PSMB8;PSMA5;PSMA6;PSMA3;PSMC5;PSMA4;PSMC6;PSMA1;PSMC3;PSMA2;PSMC4;PSMC1;PSMC2;PSME1;PSME2;UBA52
Turquoise	GO_Biological_Process_2018.44	negative regulation of mitotic cell cycle phase transition (GO:1901991)	40/79	2.78147e-23	1.89772e-21	11.9634	621.338	PSMD10;PSMD12;PSMD14;PSMD13;PINX1;PSMB10;PSMA7;PSMD8;PSMB6;PSMD9;PSMB7;PSMD6;PSMB4;PSMD7;PSMB5;PSMD4;UBB;PSMB2;PSMB3;PSMB1;RPS27A;SKP1;PSMB8;RBX1;PSMA5;PSMA6;PSMA3;PSMC5;PSMA4;PSMC6;RGCC;PSMA1;PSMC3;PSMA2;PSMC4;PSMC1;PSMC2;PSME1;PSME2;UBA52
Turquoise	Reactome_2016.94	Assembly of the pre-replicative complex Homo sapiens R-HSA-68867	36/67	3.02012e-22	3.35105e-21	13.5172	669.799	PSMD10;PSMD12;PSMD14;PSMD13;PSMB10;PSMA7;PSMD8;PSMB6;PSMD9;PSMB7;PSMD6;PSMB4;PSMD7;PSMB5;PSMD4;UBB;PSMB2;PSMB3;PSMB1;RPS27A;PSMB8;PSMA5;PSMA6;PSMA3;PSMC5;PSMA4;PSMC6;PSMA1;PSMC3;PSMA2;PSMC4;PSMC1;PSMC2;PSME1;PSME2;UBA52
Turquoise	GO_Biological_Process_2018.45	regulation of cellular ketone metabolic process (GO:0010565)	35/61	5.82383e-23	3.88514e-21	15.6633	801.923	PSMD10;PSMD12;PSMD14;PSMD13;OAZ1;OAZ2;PSMB10;PSMA7;PSMD8;PSMB6;PSMD9;PSMB7;PSMD6;PSMB4;PSMD7;PSMB5;PSMD4;PSMB2;PSMB3;PSMB1;PSMB8;PSMA5;PSMA6;PSMA3;PSMC5;PSMA4;PSMC6;PSMA1;PSMC3;PSMA2;PSMC4;PSMC1;PSMC2;PSME1;PSME2
Turquoise	GO_Biological_Process_2018.46	regulation of transcription from RNA polymerase II promoter in response to stress (GO:0043618)	43/93	6.59989e-23	4.30715e-21	10.0445	512.995	PSMD10;PSMD12;PSMD14;PSMD13;UBE2D2;HIGD1A;PSMB10;PSMA7;PSMD8;PSMB6;PSMD9;PSMB7;PSMD6;PSMB4;PSMD7;PSMB5;PSMD4;UBB;PSMB2;PSMB3;PSMB1;ELOB;ELOC;RPS27A;EGLN2;PSMB8;RBX1;PSMA5;PSMA6;PSMA3;PSMC5;PSMA4;PSMC6;PSMA1;PSMC3;PSMA2;PSMC4;PSMC1;PSMC2;PSME1;PSME2;UBA52;ATF4
Turquoise	GO_Biological_Process_2018.47	ribosomal large subunit biogenesis (GO:0042273)	35/63	2.56471e-22	1.63814e-20	14.5429	723.002	RPL5;RPL3;RPL10;RPL12;RPL11;MAK16;SNU13;RPL10A;RPF2;RPL6;RPL7;RPF1;MRPL11;RPL7A;MRPL20;MRPL1;PES1;RPL14;BRIX1;ZNF622;AAMP;NPM1;NOP16;WDR18;WDR74;RPL35A;RPL23A;RSL1D1;NSA2;MRTO4;NHP2;RPL24;RPL26;NOP53;RSL24D1
Turquoise	Reactome_2016.95	Degradation of beta-catenin by the destruction complex Homo sapiens R-HSA-195253	39/82	1.8392e-21	2.01925e-20	10.5703	504.676	PSMD10;PSMD12;PSMD14;PSMD13;PSMB10;PSMA7;PSMD8;PSMB6;PSMD9;PSMB7;PPP2CB;PSMD6;PSMB4;PSMD7;PSMB5;PSMD4;UBB;PSMB2;PSMB3;PSMB1;RPS27A;SKP1;PSMB8;RBX1;PSMA5;PSMA6;PSMA3;PSMC5;PSMA4;PSMC6;PSMA1;PSMC3;PSMA2;PSMC4;PSMC1;PSMC2;PSME1;PSME2;UBA52
Turquoise	Reactome_2016.96	Switching of origins to a post-replicative state Homo sapiens R-HSA-69052	36/70	2.17391e-21	2.33751e-20	12.3225	586.277	PSMD10;PSMD12;PSMD14;PSMD13;PSMB10;PSMA7;PSMD8;PSMB6;PSMD9;PSMB7;PSMD6;PSMB4;PSMD7;PSMB5;PSMD4;UBB;PSMB2;PSMB3;PSMB1;RPS27A;PSMB8;PSMA5;PSMA6;PSMA3;PSMC5;PSMA4;PSMC6;PSMA1;PSMC3;PSMA2;PSMC4;PSMC1;PSMC2;PSME1;PSME2;UBA52
Turquoise	Reactome_2016.97	Orc1 removal from chromatin Homo sapiens R-HSA-68949	36/70	2.17391e-21	2.33751e-20	12.3225	586.277	PSMD10;PSMD12;PSMD14;PSMD13;PSMB10;PSMA7;PSMD8;PSMB6;PSMD9;PSMB7;PSMD6;PSMB4;PSMD7;PSMB5;PSMD4;UBB;PSMB2;PSMB3;PSMB1;RPS27A;PSMB8;PSMA5;PSMA6;PSMA3;PSMC5;PSMA4;PSMC6;PSMA1;PSMC3;PSMA2;PSMC4;PSMC1;PSMC2;PSME1;PSME2;UBA52
Turquoise	GO_Biological_Process_2018.48	Wnt signaling pathway, planar cell polarity pathway (GO:0060071)	41/88	4.60991e-22	2.88312e-20	10.1773	499.997	PSMD10;PSMD12;PSMD14;PSMD13;ARRB2;PSMB10;PSMA7;PSMD8;CDC42;PSMB6;PSMD9;PSMB7;PSMD6;PSMB4;PSMD7;PARD6A;PSMB5;PSMD4;UBB;PSMB2;PSMB3;PSMB1;AP2S1;RPS27A;PSMB8;PSMA5;PSMA6;PSMA3;PSMC5;PSMA4;PSMC6;PSMA1;PSMC3;PSMA2;PSMC4;PSMC1;PSMC2;PSME1;PSME2;PFN1;UBA52
Turquoise	GO_Biological_Process_2018.49	ribonucleoprotein complex assembly (GO:0022618)	55/156	6.04016e-22	3.70052e-20	6.39135	312.271	RPL5;RPL3;GEMIN2;MRPS11;RPL6;RPS15;RPS14;RPS17;SNRPD2;RPS19;SNRPD1;DENR;RPL38;SNRPD3;ABT1;HSP90AA1;RPS5;RPSA;MRPS7;CLNS1A;MRTO4;SNRPG;RPL24;LUC7L3;STRAP;SNRPE;SNRPF;GEMIN7;SNRPC;RPL10;RPS10-NUDT3;DDX1;RPL12;RPL11;RPF2;MRPL11;RPF1;RRP7A;MRPL20;POLR2D;EIF4H;BRIX1;MCTS1;ZRSR2;NPM1;PTGES3;WDR18;RPL23A;LSM4;LSM3;RPS28;RPS27;RSL24D1;NOP53;RPS23
Turquoise	GO_Biological_Process_2018.50	regulation of establishment of planar polarity (GO:0090175)	41/89	7.89065e-22	4.73754e-20	9.96473	484.198	PSMD10;PSMD12;PSMD14;PSMD13;ARRB2;PSMB10;PSMA7;PSMD8;CDC42;PSMB6;PSMD9;PSMB7;PSMD6;PSMB4;PSMD7;PARD6A;PSMB5;PSMD4;UBB;PSMB2;PSMB3;PSMB1;AP2S1;RPS27A;PSMB8;PSMA5;PSMA6;PSMA3;PSMC5;PSMA4;PSMC6;PSMA1;PSMC3;PSMA2;PSMC4;PSMC1;PSMC2;PSME1;PSME2;PFN1;UBA52
Turquoise	Reactome_2016.98	Metabolism of polyamines Homo sapiens R-HSA-351202	39/84	5.51929e-21	5.8741e-20	10.0994	471.095	PSMD10;PSMD12;PSMD14;PSMD13;APIP;SAT1;OAZ1;OAZ2;PSMB10;PSMA7;PSMD8;PSMB6;PSMD9;PSMB7;PSMD6;PSMB4;PSMD7;PSMB5;PSMD4;PSMB2;PSMB3;PSMB1;ASL;ENOPH1;PSMB8;PSMA5;PSMA6;PSMA3;PSMC5;PSMA4;PSMC6;PSMA1;PSMC3;PSMA2;PSMC4;PSMC1;PSMC2;PSME1;PSME2
Turquoise	GO_Biological_Process_2018.51	regulation of hematopoietic progenitor cell differentiation (GO:1901532)	38/77	1.13284e-21	6.66818e-20	11.3508	547.445	PSMD10;PSMD12;PSMD14;PSMD13;PSMB10;PSMA7;PSMD8;PSMB6;PSMD9;PSMB7;PSMD6;PSMB4;PSMD7;PSMB5;PSMD4;UBB;PSMB2;PSMB3;PSMB1;RPS27A;LMO1;PSMB8;PSMA5;PSMA6;PSMA3;PSMC5;PSMA4;PSMC6;PSMA1;PSMC3;PSMA2;PSMC4;PSMC1;PSMC2;PSME1;PSME2;PDCD2;UBA52
Turquoise	GO_Biological_Process_2018.52	cellular response to hypoxia (GO:0071456)	50/132	1.15806e-21	6.68557e-20	7.14113	344.256	UBE2D2;PSMD8;PSMD9;PSMD6;PSMD7;PSMD4;FAM162A;ELOB;ELOC;RBX1;PSMA5;PSMA6;PSMA3;PSMA4;PSMA1;PSMA2;PSME1;PSME2;UBA52;PSMD10;PSMD12;PSMD14;PSMD13;HIGD1A;PSMB10;PSMA7;PSMB6;PSMB7;PSMB4;PSMB5;UBB;PSMB2;PSMB3;PSMB1;RPS27A;EGLN2;BAD;MT3;PSMB8;PINK1;PSMC5;RGCC;PSMC6;PSMC3;PSMC4;PSMC1;PSMC2;STUB1;P4HB;NOP53
Turquoise	Reactome_2016.99	Removal of licensing factors from origins Homo sapiens R-HSA-69300	36/72	7.51737e-21	7.91982e-20	11.6367	539.208	PSMD10;PSMD12;PSMD14;PSMD13;PSMB10;PSMA7;PSMD8;PSMB6;PSMD9;PSMB7;PSMD6;PSMB4;PSMD7;PSMB5;PSMD4;UBB;PSMB2;PSMB3;PSMB1;RPS27A;PSMB8;PSMA5;PSMA6;PSMA3;PSMC5;PSMA4;PSMC6;PSMA1;PSMC3;PSMA2;PSMC4;PSMC1;PSMC2;PSME1;PSME2;UBA52
Turquoise	Reactome_2016.100	Hedgehog 'on' state Homo sapiens R-HSA-5632684	39/85	9.4151e-21	9.81995e-20	9.87927	455.553	PSMD10;PSMD12;PSMD14;PSMD13;ARRB2;PSMB10;PSMA7;PSMD8;PSMB6;PSMD9;PSMB7;SHH;PSMD6;PSMB4;PSMD7;PSMB5;PSMD4;UBB;PSMB2;PSMB3;PSMB1;RPS27A;PSMB8;RBX1;PSMA5;PSMA6;PSMA3;PSMC5;PSMA4;PSMC6;PSMA1;PSMC3;PSMA2;PSMC4;PSMC1;PSMC2;PSME1;PSME2;UBA52
Turquoise	Reactome_2016.101	Host Interactions of HIV factors Homo sapiens R-HSA-162909	48/129	1.82065e-20	1.88014e-19	6.93163	315.06	PSMD10;PSMD12;PSMD14;PSMD13;PSMB10;PSMA7;PSMD8;PSMB6;PSMD9;PSMB7;PSMD6;PSMB4;PSMD7;PSMB5;PSMD4;UBB;PSMB2;PSMB3;PSMB1;AP2S1;ATP6V1H;BANF1;NUP43;RPS27A;B2M;SKP1;RANBP1;NPM1;PSMB8;RBX1;PSMA5;PSMA6;PSMA3;PSMC5;PSMA4;PSMC6;PSMA1;PSMC3;PSMA2;PSMC4;PSMC1;PSMC2;PSME1;PSME2;PPIA;UBA52;SLC25A4;RAN
Turquoise	GO_Biological_Process_2018.53	NIK/NF-kappaB signaling (GO:0038061)	38/80	6.3789e-21	3.6131e-19	10.5383	490.046	PSMD10;PSMD12;PSMD14;PSMD13;PSMB10;PSMA7;PSMD8;PSMB6;PSMD9;PSMB7;PSMD6;PSMB4;PSMD7;PSMB5;PSMD4;UBB;PSMB2;PSMB3;PSMB1;RPS27A;SKP1;PSMB8;PSMA5;PSMA6;PSMA3;PSMC5;PSMA4;PSMC6;PSMA1;PSMC3;PSMA2;PSMC4;PSMC1;PSMC2;PSME1;PSME2;COPS8;UBA52
Turquoise	GO_Biological_Process_2018.54	regulation of hematopoietic stem cell differentiation (GO:1902036)	37/76	7.08604e-21	3.93931e-19	11.0451	512.45	PSMD10;PSMD12;PSMD14;PSMD13;PSMB10;PSMA7;PSMD8;PSMB6;PSMD9;PSMB7;PSMD6;PSMB4;PSMD7;PSMB5;PSMD4;UBB;PSMB2;PSMB3;PSMB1;RPS27A;LMO1;PSMB8;PSMA5;PSMA6;PSMA3;PSMC5;PSMA4;PSMC6;PSMA1;PSMC3;PSMA2;PSMC4;PSMC1;PSMC2;PSME1;PSME2;UBA52
Turquoise	Reactome_2016.102	Regulation of DNA replication Homo sapiens R-HSA-69304	36/75	4.3706e-20	4.46915e-19	10.7398	478.745	PSMD10;PSMD12;PSMD14;PSMD13;PSMB10;PSMA7;PSMD8;PSMB6;PSMD9;PSMB7;PSMD6;PSMB4;PSMD7;PSMB5;PSMD4;UBB;PSMB2;PSMB3;PSMB1;RPS27A;PSMB8;PSMA5;PSMA6;PSMA3;PSMC5;PSMA4;PSMC6;PSMA1;PSMC3;PSMA2;PSMC4;PSMC1;PSMC2;PSME1;PSME2;UBA52
Turquoise	Reactome_2016.103	DNA Replication Pre-Initiation Homo sapiens R-HSA-69002	37/82	1.88604e-19	1.89148e-18	9.56929	412.576	PSMD10;PSMD12;PSMD14;PSMD13;PSMB10;PSMA7;PSMD8;PSMB6;PSMD9;PSMB7;PSMD6;PSMB4;PSMD7;PSMB5;PSMD4;UBB;PSMB2;PSMB3;PSMB1;RPS27A;PSMB8;PSMA5;PSMA6;PSMA3;PSMC5;PSMA4;PSMC6;PSMA1;PSMC3;PSMA2;PSMC4;PSMC1;RPA3;PSMC2;PSME1;PSME2;UBA52
Turquoise	Reactome_2016.104	M/G1 Transition Homo sapiens R-HSA-68874	37/82	1.88604e-19	1.89148e-18	9.56929	412.576	PSMD10;PSMD12;PSMD14;PSMD13;PSMB10;PSMA7;PSMD8;PSMB6;PSMD9;PSMB7;PSMD6;PSMB4;PSMD7;PSMB5;PSMD4;UBB;PSMB2;PSMB3;PSMB1;RPS27A;PSMB8;PSMA5;PSMA6;PSMA3;PSMC5;PSMA4;PSMC6;PSMA1;PSMC3;PSMA2;PSMC4;PSMC1;RPA3;PSMC2;PSME1;PSME2;UBA52
Turquoise	GO_Biological_Process_2018.55	regulation of stem cell differentiation (GO:2000736)	39/88	4.41199e-20	2.40814e-18	9.2729	413.269	PSMD10;PSMD12;PSMD14;PSMD13;TACSTD2;PSMB10;PSMA7;PSMD8;PSMB6;PSMD9;PSMB7;PSMD6;PSMB4;PSMD7;PSMB5;PSMD4;UBB;PSMB2;PSMB3;PSMB1;RPS27A;HES5;LMO1;PSMB8;PSMA5;PSMA6;PSMA3;PSMC5;PSMA4;PSMC6;PSMA1;PSMC3;PSMA2;PSMC4;PSMC1;PSMC2;PSME1;PSME2;UBA52
Turquoise	Reactome_2016.105	Synthesis of DNA Homo sapiens R-HSA-69239	40/97	3.56933e-19	3.54554e-18	8.17747	347.352	PSMD10;PSMD12;PCNA;PSMD14;PSMD13;PSMB10;PSMA7;PSMD8;PSMB6;PSMD9;PSMB7;POLD4;PSMD6;PSMB4;PSMD7;PSMB5;PSMD4;UBB;PSMB2;PSMB3;PSMB1;RPS27A;RFC2;PSMB8;PSMA5;PSMA6;PSMA3;PSMC5;PSMA4;PSMC6;PSMA1;PSMC3;PSMA2;PSMC4;PSMC1;RPA3;PSMC2;PSME1;PSME2;UBA52
Turquoise	GO_Biological_Process_2018.56	ribosome assembly (GO:0042255)	31/56	7.37979e-20	3.95609e-18	14.3925	634.031	RPL5;RPL3;RPL10;RPS10-NUDT3;MRPS11;RPL12;RPL11;RPF2;RPL6;RPF1;MRPL11;RPS15;RRP7A;RPS14;MRPL20;RPS17;RPS19;BRIX1;NPM1;RPS5;WDR18;RPSA;RPL23A;MRPS7;RPS28;RPS27;MRTO4;SBDS;RPL24;NOP53;RSL24D1
Turquoise	GO_Biological_Process_2018.57	antigen processing and presentation of exogenous peptide antigen via MHC class I, TAP-dependent (GO:0002479)	35/75	4.59896e-19	2.42212e-17	10.1734	429.554	PSMD10;PSMD12;PSMD14;PSMD13;PSMB10;PSMA7;PSMD8;PSMB6;PSMD9;PSMB7;PSMD6;PSMB4;PSMD7;PSMB5;PSMD4;PSMB2;PSMB3;PSMB1;B2M;CYBA;PSMB8;PSMA5;PSMA6;PSMA3;PSMC5;PSMA4;PSMC6;PSMA1;PSMC3;PSMA2;PSMC4;PSMC1;PSMC2;PSME1;PSME2
Turquoise	GO_Biological_Process_2018.58	regulation of mRNA stability (GO:0043488)	46/128	5.81059e-19	3.00748e-17	6.55307	275.16	PSMD10;PSMD12;SET;ANP32A;PSMD14;PSMD13;PSMB10;PSMA7;PSMD8;EXOSC7;PSMB6;PSMD9;PSMB7;PSMD6;PSMB4;PSMD7;PSMB5;PSMD4;UBB;PSMB2;PCBP4;PSMB3;EXOSC9;PSMB1;RPS27A;EXOSC2;PAIP1;NPM1;PSMB8;PSMA5;PSMA6;PSMA3;PSMC5;PSMA4;PSMC6;PSMA1;PSMC3;PSMA2;PSMC4;PSMC1;APEX1;PSMC2;SERBP1;PSME1;PSME2;UBA52
Turquoise	GO_Biological_Process_2018.59	mRNA splicing, via spliceosome (GO:0000398)	68/261	1.4651e-18	7.45462e-17	4.14908	170.38	DBR1;GEMIN2;PQBP1;UBL5;SNRPD2;SNRPD1;MAGOH;SNRPD3;BCAS2;RBM17;NCBP2;BUD31;ZCRB1;GTF2F1;GTF2F2;SYF2;CLNS1A;FRG1;SNRPG;STRAP;SRSF3;SNRNP27;PPIE;PPIH;SNRPE;NAA38;SNRPF;SNRNP25;GEMIN7;DNAJC8;SNRPC;U2AF1L5;SF3B5;RBM8A;SF3B6;DDX1;WBP4;SNU13;RNF113A;ZMAT2;PUF60;TRA2B;ZMAT5;POLR2D;POLR2F;RALY;POLR2G;SNRPB2;POLR2H;POLR2I;HNRNPA1;DCPS;POLR2J;POLR2K;POLR2L;ZRSR2;PPIL1;UPF3B;CWC15;MAGOHB;LSM5;LSM4;LSM3;LSM7;…
Turquoise	Reactome_2016.106	DNA Replication Homo sapiens R-HSA-69306	40/105	1.0401e-17	1.02341e-16	7.16788	280.297	PSMD10;PSMD12;PCNA;PSMD14;PSMD13;PSMB10;PSMA7;PSMD8;PSMB6;PSMD9;PSMB7;POLD4;PSMD6;PSMB4;PSMD7;PSMB5;PSMD4;UBB;PSMB2;PSMB3;PSMB1;RPS27A;RFC2;PSMB8;PSMA5;PSMA6;PSMA3;PSMC5;PSMA4;PSMC6;PSMA1;PSMC3;PSMA2;PSMC4;PSMC1;RPA3;PSMC2;PSME1;PSME2;UBA52
Turquoise	GO_Biological_Process_2018.60	antigen processing and presentation of exogenous peptide antigen via MHC class I (GO:0042590)	35/78	2.23105e-18	1.11627e-16	9.46208	384.577	PSMD10;PSMD12;PSMD14;PSMD13;PSMB10;PSMA7;PSMD8;PSMB6;PSMD9;PSMB7;PSMD6;PSMB4;PSMD7;PSMB5;PSMD4;PSMB2;PSMB3;PSMB1;B2M;CYBA;PSMB8;PSMA5;PSMA6;PSMA3;PSMC5;PSMA4;PSMC6;PSMA1;PSMC3;PSMA2;PSMC4;PSMC1;PSMC2;PSME1;PSME2
Turquoise	GO_Biological_Process_2018.61	mRNA processing (GO:0006397)	71/283	2.41065e-18	1.18636e-16	3.94741	160.133	DBR1;GEMIN2;PQBP1;UBL5;SNRPD2;SNRPD1;MAGOH;SNRPD3;BCAS2;RBM17;NCBP2;BUD31;ZCRB1;GTF2F1;GTF2F2;THOC7;KIN;SYF2;SARNP;FRG1;SNRPG;SRSF3;SNRNP27;PPIE;PPIH;SNRPE;NAA38;SNRPF;SNRNP25;GEMIN7;DNAJC8;AURKAIP1;SNRPC;PRMT9;U2AF1L5;SF3B5;RBM8A;SF3B6;WBP4;SUPT4H1;SNU13;ZMAT2;PUF60;TRA2B;ZMAT5;POLR2D;POLR2F;RALY;POLR2G;SNRPB2;POLR2H;POLR2I;HNRNPA1;POLR2J;POLR2K;POLR2L;ZRSR2;CHTOP;PPIL1;UPF3B;CWC15;MAGOHB;LSM5;L…
Turquoise	Reactome_2016.107	MAPK6/MAPK4 signaling Homo sapiens R-HSA-5687128	37/92	2.09129e-17	2.03852e-16	7.82515	300.534	PSMD10;PSMD12;PSMD14;PSMD13;PSMB10;PSMA7;PSMD8;CDC42;PSMB6;PSMD9;PSMB7;PSMD6;PSMB4;PSMD7;PSMB5;PSMD4;UBB;PSMB2;PSMB3;PSMB1;RPS27A;PSMB8;PSMA5;PSMA6;PSMA3;PSMC5;PSMA4;PSMC6;PSMA1;PSMC3;PSMA2;PSMC4;PSMC1;PSMC2;PSME1;PSME2;UBA52
Turquoise	Reactome_2016.108	G1/S Transition Homo sapiens R-HSA-69206	41/112	2.18976e-17	2.11474e-16	6.72827	258.098	PSMD10;PSMD12;PCNA;PSMD14;PSMD13;PSMB10;PSMA7;PSMD8;PSMB6;PSMD9;PSMB7;PPP2CB;PSMD6;PSMB4;PSMD7;PSMB5;PSMD4;UBB;PSMB2;PSMB3;PSMB1;RPS27A;SKP1;PSMB8;PSMA5;PSMA6;PSMA3;PSMC5;PSMA4;PSMC6;PSMA1;PSMC3;CDK4;PSMA2;PSMC4;PSMC1;RPA3;PSMC2;PSME1;PSME2;UBA52
Turquoise	Reactome_2016.109	Separation of Sister Chromatids Homo sapiens R-HSA-2467813	50/162	2.78164e-17	2.6617e-16	5.21976	198.982	PSMD8;PSMD9;PSMD6;PSMD7;PSMD4;NUDC;SEC13;UBE2E1;PSMA5;PSMA6;PSMA3;PSMA4;PSMA1;PSMA2;PSME1;PSME2;ANAPC4;UBA52;PSMD10;PSMD12;ANAPC15;ANAPC16;PSMD14;PSMD13;PSMB10;PSMA7;ANAPC11;PSMB6;PSMB7;PPP2CB;PSMB4;PSMB5;UBB;PSMB2;PSMB3;PSMB1;NUP43;BUB3;RPS27A;ZWINT;PSMB8;PSMC5;RPS27;PSMC6;PSMC3;PSMC4;PSMC1;CDC16;PSMC2;B9D2
Turquoise	DisGeNET.2	Acidosis, Lactic	57/183	1.01093e-19	2.72394e-16	5.30908	232.21	MRPS16;NDUFA11;NDUFA12;NFU1;MPC1;COA6;ATPAF2;TSFM;MRPS22;COX6B1;NDUFS8;NDUFS7;SCO2;NDUFS6;SLC25A19;ETHE1;BOLA3;NDUFS4;NDUFS3;TFAM;NDUFS2;SUCLG1;TMEM126B;SLC25A4;ISCU;ATF4;NDUFB9;FH;UQCRB;NAXE;NDUFB11;NDUFB3;PDHB;LIAS;HSD17B10;TMEM70;PHKG2;COX14;CYC1;NDUFV2;NDUFV1;NDUFA9;SURF1;TIMMDC1;UQCC3;NDUFA5;PET100;NDUFA2;NDUFA1;ATP5F1E;SUCLA2;LYRM4;UQCRQ;NDUFAF5;NDUFAF2;NDUFAF3;COX20
Turquoise	Reactome_2016.110	Mitochondrial protein import Homo sapiens R-HSA-1268020	28/54	4.61867e-17	4.37934e-16	12.4753	469.245	TIMM9;COX17;TIMM13;TIMM10;TOMM22;TIMM50;HSPD1;CHCHD4;CHCHD2;SAMM50;GRPEL1;PMPCB;TIMM17B;CYC1;TIMM8B;DNAJC19;MTX1;MTX2;IDH3G;PAM16;TIMM23;TIMM22;GFER;TIMM10B;TOMM7;SLC25A4;TOMM5;TOMM6
Turquoise	Reactome_2016.111	CLEC7A (Dectin-1) signaling Homo sapiens R-HSA-5607764	38/99	5.04336e-17	4.65507e-16	7.24838	272.002	PSMD10;PSMD12;PSMD14;PSMD13;UBE2D2;PSMB10;PSMA7;PSMD8;PSMB6;PSMD9;PSMB7;PSMD6;PSMB4;PSMD7;PSMB5;PSMD4;UBB;PSMB2;PSMB3;PSMB1;RPS27A;SKP1;PSMB8;PSMA5;PSMA6;PSMA3;PSMC5;PSMA4;PSMC6;PSMA1;PSMC3;PSMA2;PSMC4;PSMC1;PSMC2;PSME1;PSME2;UBA52
Turquoise	Reactome_2016.112	Downstream TCR signaling Homo sapiens R-HSA-202424	38/99	5.04336e-17	4.65507e-16	7.24838	272.002	PSMD10;PSMD12;PSMD14;PSMD13;UBE2D2;PSMB10;PSMA7;PSMD8;PSMB6;PSMD9;PSMB7;PSMD6;PSMB4;PSMD7;PSMB5;PSMD4;UBB;PSMB2;PSMB3;PSMB1;RPS27A;SKP1;PSMB8;PSMA5;PSMA6;PSMA3;PSMC5;PSMA4;PSMC6;PSMA1;PSMC3;PSMA2;PSMC4;PSMC1;PSMC2;PSME1;PSME2;UBA52
Turquoise	Reactome_2016.113	Hedgehog 'off' state Homo sapiens R-HSA-5610787	38/99	5.04336e-17	4.65507e-16	7.24838	272.002	PSMD10;PSMD12;PSMD14;PSMD13;PSMB10;PSMA7;PSMD8;PSMB6;PSMD9;PSMB7;PSMD6;PSMB4;PSMD7;PSMB5;PSMD4;UBB;PSMB2;PSMB3;PSMB1;RPS27A;SKP1;PSMB8;RBX1;PSMA5;PSMA6;PSMA3;PSMC5;PSMA4;PSMC6;PSMA1;PSMC3;PSMA2;PSMC4;PSMC1;PSMC2;PSME1;PSME2;UBA52
Turquoise	GO_Biological_Process_2018.62	interleukin-1-mediated signaling pathway (GO:0070498)	38/95	9.62495e-18	4.66034e-16	7.75873	304.004	PSMD10;PSMD12;PSMD14;PSMD13;PSMB10;PSMA7;PSMD8;PSMB6;PSMD9;PSMB7;PSMD6;PSMB4;PSMD7;PSMB5;PSMD4;UBB;PSMB2;PSMB3;PSMB1;RPS27A;SKP1;PSMB8;RBX1;PSMA5;PSMA6;PSMA3;PSMC5;PSMA4;PSMC6;PSMA1;PSMC3;PSMA2;PSMC4;PSMC1;PSMC2;PSME1;PSME2;UBA52
Turquoise	DisGeNET.3	Lactic acidemia	50/148	3.71216e-19	6.66827e-16	5.97001	253.352	MRPS16;NDUFA11;NDUFA12;NFU1;MPC1;COA6;ATPAF2;TSFM;COX6B1;NDUFS8;NDUFS7;SCO2;NDUFS6;SLC25A19;ETHE1;BOLA3;NDUFS4;NDUFS3;NDUFS2;SUCLG1;TMEM126B;SLC25A4;ISCU;NDUFB9;FH;NAXE;NDUFB3;PDHB;LIAS;HSD17B10;TMEM70;PHKG2;COX14;CYC1;NDUFV2;NDUFV1;NDUFA9;SURF1;TIMMDC1;UQCC3;PET100;NDUFA2;NDUFA1;ATP5F1E;SUCLA2;LYRM4;NDUFAF5;NDUFAF2;NDUFAF3;COX20
Turquoise	Reactome_2016.114	TNFR2 non-canonical NF-kB pathway Homo sapiens R-HSA-5668541	37/95	7.3819e-17	6.75379e-16	7.41919	275.585	PSMD10;PSMD12;PSMD14;PSMD13;PSMB10;PSMA7;PSMD8;PSMB6;PSMD9;PSMB7;PSMD6;PSMB4;PSMD7;PSMB5;PSMD4;UBB;PSMB2;PSMB3;PSMB1;RPS27A;SKP1;PSMB8;PSMA5;PSMA6;PSMA3;PSMC5;PSMA4;PSMC6;PSMA1;PSMC3;PSMA2;PSMC4;PSMC1;PSMC2;PSME1;PSME2;UBA52
Turquoise	Reactome_2016.115	Mitotic Anaphase Homo sapiens R-HSA-68882	51/173	1.15409e-16	1.04671e-15	4.8882	179.387	PSMD8;PSMD9;PSMD6;PSMD7;PSMD4;BANF1;NUDC;SEC13;UBE2E1;PSMA5;PSMA6;PSMA3;PSMA4;PSMA1;PSMA2;PSME1;PSME2;ANAPC4;UBA52;PSMD10;PSMD12;ANAPC15;ANAPC16;PSMD14;PSMD13;PSMB10;PSMA7;ANAPC11;PSMB6;PSMB7;PPP2CB;PSMB4;PSMB5;UBB;PSMB2;PSMB3;PSMB1;NUP43;BUB3;RPS27A;ZWINT;PSMB8;PSMC5;RPS27;PSMC6;PSMC3;PSMC4;PSMC1;CDC16;PSMC2;B9D2
Turquoise	Reactome_2016.116	Mitotic Metaphase and Anaphase Homo sapiens R-HSA-2555396	51/174	1.50709e-16	1.35508e-15	4.84819	176.625	PSMD8;PSMD9;PSMD6;PSMD7;PSMD4;BANF1;NUDC;SEC13;UBE2E1;PSMA5;PSMA6;PSMA3;PSMA4;PSMA1;PSMA2;PSME1;PSME2;ANAPC4;UBA52;PSMD10;PSMD12;ANAPC15;ANAPC16;PSMD14;PSMD13;PSMB10;PSMA7;ANAPC11;PSMB6;PSMB7;PPP2CB;PSMB4;PSMB5;UBB;PSMB2;PSMB3;PSMB1;NUP43;BUB3;RPS27A;ZWINT;PSMB8;PSMC5;RPS27;PSMC6;PSMC3;PSMC4;PSMC1;CDC16;PSMC2;B9D2
Turquoise	GO_Biological_Process_2018.63	RNA splicing, via transesterification reactions with bulged adenosine as nucleophile (GO:0000377)	62/236	3.13472e-17	1.49372e-15	4.1842	159.005	DBR1;PQBP1;UBL5;SNRPD2;SNRPD1;MAGOH;SNRPD3;BCAS2;RBM17;NCBP2;BUD31;ZCRB1;GTF2F1;GTF2F2;SYF2;FRG1;SNRPG;SRSF3;SNRNP27;PPIE;PPIH;SNRPE;NAA38;SNRPF;SNRNP25;GEMIN7;DNAJC8;SNRPC;U2AF1L5;SF3B5;RBM8A;SF3B6;WBP4;SNU13;ZMAT2;PUF60;TRA2B;ZMAT5;POLR2D;POLR2F;RALY;POLR2G;SNRPB2;POLR2H;POLR2I;HNRNPA1;POLR2J;POLR2K;POLR2L;ZRSR2;PPIL1;UPF3B;CWC15;MAGOHB;LSM5;LSM4;LSM3;LSM7;PHF5A;LSM6;PPIL3;RBMX
Turquoise	Reactome_2016.117	S Phase Homo sapiens R-HSA-69242	42/124	2.32428e-16	2.07198e-15	5.968	214.836	PSMD10;PSMD12;PCNA;PSMD14;PSMD13;PSMB10;PSMA7;PSMD8;PSMB6;PSMD9;PSMB7;POLD4;PSMD6;PSMB4;PSMD7;PSMB5;PSMD4;UBB;PSMB2;PSMB3;PSMB1;RPS27A;SKP1;RFC2;PSMB8;PSMA5;PSMA6;PSMA3;PSMC5;PSMA4;PSMC6;PSMA1;PSMC3;CDK4;PSMA2;PSMC4;PSMC1;RPA3;PSMC2;PSME1;PSME2;UBA52
Turquoise	DisGeNET.4	Increased CSF lactate	31/61	2.06783e-18	2.78588e-15	11.9905	488.252	NDUFB9;ECHS1;NDUFA11;NAXE;NDUFA12;NDUFB3;HTRA2;TXN2;COX14;NDUFV2;NDUFV1;NDUFA9;SURF1;TIMMDC1;PET100;NDUFA2;NDUFA1;COX6B1;NDUFS8;NDUFS7;NDUFS6;SCO2;SLC25A19;NDUFS4;NDUFAF5;NDUFS3;NDUFAF2;NDUFS2;NDUFAF3;TMEM126B;COX20
Turquoise	GO_Biological_Process_2018.64	regulation of G2/M transition of mitotic cell cycle (GO:0010389)	47/149	9.57652e-17	4.49198e-15	5.38023	198.448	PSMD10;DYNC1I2;PSMD12;PSMD14;PSMD13;CETN2;SSNA1;PINX1;DCTN3;PSMB10;PSMA7;PSMD8;PSMB6;PSMD9;PSMB7;PSMD6;PSMB4;PSMD7;TUBA1A;PSMB5;PSMD4;UBB;PSMB2;PSMB3;PSMB1;RPS27A;SKP1;HSP90AA1;DYNLL1;PSMB8;RBX1;PSMA5;PSMA6;PSMA3;PSMC5;PSMA4;PSMC6;PSMA1;PSMC3;CDK4;PSMA2;PSMC4;PSMC1;PSMC2;PSME1;PSME2;UBA52
Turquoise	Reactome_2016.118	Beta-catenin independent WNT signaling Homo sapiens R-HSA-3858494	45/144	6.40067e-16	5.65754e-15	5.30148	185.472	PSMD10;PSMD12;PSMD14;PSMD13;CLTB;CLTA;ARRB2;PSMB10;PSMA7;PSMD8;PSMB6;PSMD9;PSMB7;PSMD6;GNG10;PSMB4;PSMD7;PARD6A;PSMB5;PSMD4;UBB;PSMB2;PSMB3;PSMB1;AP2S1;RAC3;RPS27A;PSMB8;GNG13;PSMA5;PSMA6;PSMA3;PSMC5;PSMA4;PSMC6;PSMA1;PSMC3;PSMA2;PSMC4;PSMC1;PSMC2;PSME1;PSME2;PFN1;UBA52
Turquoise	Reactome_2016.119	Mitotic G1-G1/S phases Homo sapiens R-HSA-453279	43/136	1.76176e-15	1.54413e-14	5.38759	183.03	PSMD10;PSMD12;PCNA;PSMD14;PSMD13;PSMB10;PSMA7;PSMD8;PSMB6;PSMD9;PSMB7;PPP2CB;PSMD6;PSMB4;PSMD7;PSMB5;PSMD4;UBB;RBBP4;PSMB2;PSMB3;PSMB1;RPS27A;SKP1;CDKN2D;PSMB8;PSMA5;PSMA6;PSMA3;PSMC5;PSMA4;PSMC6;PSMA1;PSMC3;CDK4;PSMA2;PSMC4;PSMC1;RPA3;PSMC2;PSME1;PSME2;UBA52
Turquoise	GO_Biological_Process_2018.65	regulation of mitotic cell cycle phase transition (GO:1901990)	52/184	4.16622e-16	1.92415e-14	4.6069	163.15	CETN2;PSMD8;PSMD9;PSMD6;PSMD7;TUBA1A;PSMD4;SKP1;HSP90AA1;UBE2E1;DYNLL1;PSMA5;PSMA6;PSMA3;PSMA4;PSMA1;PSMA2;PSME1;PSME2;ANAPC4;UBA52;PSMD10;DYNC1I2;PSMD12;ANAPC15;ANAPC16;PSMD14;PSMD13;SSNA1;DCTN3;PSMB10;PSMA7;ANAPC11;PSMB6;PSMB7;PSMB4;PSMB5;UBB;PSMB2;PSMB3;PSMB1;BUB3;RPS27A;PSMB8;PSMC5;RGCC;PSMC6;PSMC3;PSMC4;PSMC1;CDC16;PSMC2
Turquoise	GO_Biological_Process_2018.66	protein targeting to mitochondrion (GO:0006626)	27/54	5.58077e-16	2.53841e-14	11.5763	406.583	NDUFA13;NDUFB8;TIMM9;TIMM13;TIMM10;MFF;TOMM22;TIMM50;HSPD1;CHCHD4;SAMM50;GRPEL1;TIMM17B;TIMM8B;DNAJC19;FIS1;HSP90AA1;PAM16;AIP;TIMM23;TIMM22;TOMM40L;TIMM10B;IMMP1L;TOMM7;UQCRC2;TOMM5
Turquoise	Reactome_2016.120	FCERI mediated NF-kB activation Homo sapiens R-HSA-2871837	38/111	4.1471e-15	3.60452e-14	6.0529	200.45	PSMD10;PSMD12;PSMD14;PSMD13;UBE2D2;PSMB10;PSMA7;PSMD8;PSMB6;PSMD9;PSMB7;PSMD6;PSMB4;PSMD7;PSMB5;PSMD4;UBB;PSMB2;PSMB3;PSMB1;RPS27A;SKP1;PSMB8;PSMA5;PSMA6;PSMA3;PSMC5;PSMA4;PSMC6;PSMA1;PSMC3;PSMA2;PSMC4;PSMC1;PSMC2;PSME1;PSME2;UBA52
Turquoise	GO_Biological_Process_2018.67	non-canonical Wnt signaling pathway (GO:0035567)	41/127	3.53537e-15	1.58406e-13	5.55019	184.688	PSMD10;PSMD12;PSMD14;PSMD13;ARRB2;PSMB10;PSMA7;PSMD8;CDC42;PSMB6;PSMD9;PSMB7;PSMD6;PSMB4;PSMD7;PARD6A;PSMB5;PSMD4;UBB;PSMB2;PSMB3;PSMB1;AP2S1;RPS27A;PSMB8;PSMA5;PSMA6;PSMA3;PSMC5;PSMA4;PSMC6;PSMA1;PSMC3;PSMA2;PSMC4;PSMC1;PSMC2;PSME1;PSME2;PFN1;UBA52
Turquoise	Reactome_2016.121	Cell Cycle Checkpoints Homo sapiens R-HSA-69620	49/182	2.36024e-14	2.03449e-13	4.29997	134.922	PSMD8;BABAM1;PSMD9;PSMD6;PSMD7;PSMD4;YWHAQ;SUMO1;RFC2;UBE2E1;PSMA5;PSMA6;PSMA3;PSMA4;PSMA1;PSMA2;PSME1;PSME2;ANAPC4;UBA52;PSMD10;PSMD12;ANAPC15;ANAPC16;PSMD14;PSMD13;PSMB10;PSMA7;ANAPC11;PSMB6;PSMB7;PSMB4;PSMB5;UBB;PSMB2;PCBP4;PSMB3;PSMB1;BUB3;RPS27A;PSMB8;PSMC5;PSMC6;PSMC3;PSMC4;PSMC1;RPA3;CDC16;PSMC2
Turquoise	Reactome_2016.122	C-type lectin receptors (CLRs) Homo sapiens R-HSA-5621481	39/123	3.23336e-14	2.76426e-13	5.39887	167.703	PSMD10;PSMD12;PSMD14;PSMD13;UBE2D2;PSMB10;PSMA7;PSMD8;PSMB6;PSMD9;PSMB7;PSMD6;PSMB4;PSMD7;PSMB5;PSMD4;UBB;PSMB2;PSMB3;PSMB1;RPS27A;HRAS;SKP1;PSMB8;PSMA5;PSMA6;PSMA3;PSMC5;PSMA4;PSMC6;PSMA1;PSMC3;PSMA2;PSMC4;PSMC1;PSMC2;PSME1;PSME2;UBA52
Turquoise	Reactome_2016.123	TCR signaling Homo sapiens R-HSA-202403	38/118	3.93475e-14	3.33654e-13	5.52116	170.418	PSMD10;PSMD12;PSMD14;PSMD13;UBE2D2;PSMB10;PSMA7;PSMD8;PSMB6;PSMD9;PSMB7;PSMD6;PSMB4;PSMD7;PSMB5;PSMD4;UBB;PSMB2;PSMB3;PSMB1;RPS27A;SKP1;PSMB8;PSMA5;PSMA6;PSMA3;PSMC5;PSMA4;PSMC6;PSMA1;PSMC3;PSMA2;PSMC4;PSMC1;PSMC2;PSME1;PSME2;UBA52
Turquoise	GO_Biological_Process_2018.68	positive regulation of canonical Wnt signaling pathway (GO:0090263)	38/113	8.06046e-15	3.55846e-13	5.89084	191.169	PSMD10;PSMD12;PSMD14;PSMD13;PSMB10;PSMA7;PSMD8;PSMB6;PSMD9;PSMB7;PSMD6;PSMB4;PSMD7;PSMB5;PSMD4;UBB;PSMB2;PSMB3;RUVBL1;PSMB1;RPS27A;PSMB8;PSMA5;PSMA6;PSMA3;PSMC5;PSMA4;PSMC6;PSMA1;PSMC3;PSMA2;PSMC4;PSMC1;PSMC2;PSME1;PSME2;PIN1;UBA52
Turquoise	Reactome_2016.124	Signaling by Hedgehog Homo sapiens R-HSA-5358351	41/136	4.90484e-14	4.12561e-13	5.02191	153.901	PSMD10;PSMD12;PSMD14;PSMD13;ARRB2;PSMB10;PSMA7;PSMD8;PSMB6;PSMD9;PSMB7;PSMD6;SHH;PSMB4;PSMD7;PSMB5;PSMD4;UBB;PSMB2;PSMB3;PSMB1;RPS27A;SKP1;PSMB8;RBX1;PSMA5;PSMA6;PSMA3;PSMC5;PSMA4;PSMC6;PSMA1;PSMC3;PSMA2;PSMC4;PSMC1;PSMC2;PSME1;PSME2;P4HB;UBA52
Turquoise	Reactome_2016.125	G2/M Transition Homo sapiens R-HSA-69275	47/173	5.51754e-14	4.60383e-13	4.34971	132.789	PSMD10;DYNC1I2;PSMD12;PSMD14;PSMD13;CETN2;SSNA1;DCTN3;PSMB10;PSMA7;PSMD8;PSMB6;PSMD9;PSMB7;PPP2CB;PSMD6;PSMB4;PSMD7;TUBA1A;PSMB5;PSMD4;UBB;RBBP4;PSMB2;PSMB3;PSMB1;RPS27A;RAB8A;SKP1;HSP90AA1;DYNLL1;PSMB8;PSMA5;PSMA6;PSMA3;PSMC5;PSMA4;PSMC6;PSMA1;PSMC3;PSMA2;PSMC4;PSMC1;PSMC2;PSME1;PSME2;UBA52
Turquoise	Reactome_2016.126	Mitotic G2-G2/M phases Homo sapiens R-HSA-453274	47/175	8.80728e-14	7.29047e-13	4.28127	128.698	PSMD10;DYNC1I2;PSMD12;PSMD14;PSMD13;CETN2;SSNA1;DCTN3;PSMB10;PSMA7;PSMD8;PSMB6;PSMD9;PSMB7;PPP2CB;PSMD6;PSMB4;PSMD7;TUBA1A;PSMB5;PSMD4;UBB;RBBP4;PSMB2;PSMB3;PSMB1;RPS27A;RAB8A;SKP1;HSP90AA1;DYNLL1;PSMB8;PSMA5;PSMA6;PSMA3;PSMC5;PSMA4;PSMC6;PSMA1;PSMC3;PSMA2;PSMC4;PSMC1;PSMC2;PSME1;PSME2;UBA52
Turquoise	GO_Biological_Process_2018.69	stimulatory C-type lectin receptor signaling pathway (GO:0002223)	39/121	1.76256e-14	7.66843e-13	5.53115	175.168	PSMD10;PSMD12;PSMD14;PSMD13;UBE2D2;PSMB10;PSMA7;PSMD8;PSMB6;PSMD9;PSMB7;PSMD6;PSMB4;PSMD7;PSMB5;PSMD4;UBB;PSMB2;PSMB3;PSMB1;RPS27A;HRAS;SKP1;PSMB8;PSMA5;PSMA6;PSMA3;PSMC5;PSMA4;PSMC6;PSMA1;PSMC3;PSMA2;PSMC4;PSMC1;PSMC2;PSME1;PSME2;UBA52
Turquoise	Reactome_2016.127	TP53 Regulates Metabolic Genes Homo sapiens R-HSA-5628897	31/84	1.33997e-13	1.10046e-12	6.77855	200.923	COX7B;COX4I1;PRKAG1;TXN;COX6A1;COX5B;COX7C;COX5A;PRDX2;PRDX5;YWHAQ;SESN1;PRDX1;COX14;COX8A;SURF1;NDUFA4;COX6C;COX6B1;RRAGA;COX7A2L;RRAGB;SCO2;RHEB;CYCS;LAMTOR2;LAMTOR1;LAMTOR4;LAMTOR3;COX20;LAMTOR5
Turquoise	GO_Biological_Process_2018.70	proteasomal protein catabolic process (GO:0010498)	57/237	3.9079e-14	1.67593e-12	3.70537	114.396	UBXN1;FAF1;ARRB2;PSMD8;PSMD9;PSMD6;PSMD7;PSMD4;UBXN6;SKP1;UBE2E1;RBX1;PSMA5;PSMA6;PSMA3;PSMA4;PSMA1;PSMA2;DDIT3;PSME1;PSME2;ANAPC4;UBA52;PSMD10;PSMD12;ANAPC15;ANAPC16;PSMD14;PSMD13;DERL1;RNF5;PSMA7;PSMB10;ANAPC11;PSMB6;PCNP;PSMB7;PSMB4;PSMB5;PSMB2;UBB;PSMB3;PSMB1;BUB3;RPS27A;UBE2B;PSMB8;NSFL1C;PSMC5;PSMC6;PSMC3;PSMC4;PSMC1;CDC16;PSMC2;RNF181;STUB1
Turquoise	DisGeNET.5	Abnormal mitochondria in muscle tissue	20/30	1.65823e-15	1.78724e-12	23.0722	785.217	NDUFB9;TIMMDC1;NDUFB10;NDUFA11;NDUFB3;NDUFA1;SDHD;NDUFS8;NDUFS7;NDUFS6;NDUFS4;NDUFAF5;SDHAF1;NDUFS3;NDUFAF2;NDUFS2;NDUFAF3;TMEM126B;NDUFV2;NDUFV1
Turquoise	GO_Biological_Process_2018.71	innate immune response activating cell surface receptor signaling pathway (GO:0002220)	39/124	4.35472e-14	1.84125e-12	5.33506	164.133	PSMD10;PSMD12;PSMD14;PSMD13;UBE2D2;PSMB10;PSMA7;PSMD8;PSMB6;PSMD9;PSMB7;PSMD6;PSMB4;PSMD7;PSMB5;PSMD4;UBB;PSMB2;PSMB3;PSMB1;RPS27A;HRAS;SKP1;PSMB8;PSMA5;PSMA6;PSMA3;PSMC5;PSMA4;PSMC6;PSMA1;PSMC3;PSMA2;PSMC4;PSMC1;PSMC2;PSME1;PSME2;UBA52
Turquoise	Reactome_2016.128	mRNA Splicing Homo sapiens R-HSA-72172	41/144	4.0949e-13	3.3367e-12	4.62983	132.061	SF3B5;RBM8A;SF3B6;SNRPD2;SNRPD1;TRA2B;MAGOH;ZMAT5;POLR2D;POLR2F;POLR2G;SNRPB2;SNRPD3;POLR2H;POLR2I;HNRNPA1;POLR2J;BCAS2;POLR2K;POLR2L;NCBP2;UPF3B;ZCRB1;CWC15;GTF2F1;LSM5;GTF2F2;LSM4;LSM3;LSM7;LSM6;PHF5A;SNRPG;SRSF3;SNRNP27;PPIH;SNRPE;SNRPF;SNRNP25;DNAJC8;RBMX
Turquoise	Reactome_2016.129	Apoptosis Homo sapiens R-HSA-109581	44/163	4.47558e-13	3.61863e-12	4.30501	122.413	PSMD10;PSMD12;PSMD14;PSMD13;HMGB1;PSMB10;PSMA7;PSMD8;PSMB6;PSMD9;PSMB7;PSMD6;PSMB4;PSMD7;PSMB5;PSMD4;FNTA;UBB;YWHAQ;PSMB2;PSMB3;PSMB1;RPS27A;BCAP31;BAD;DYNLL1;PSMB8;PSMA5;PSMA6;PSMA3;PSMC5;PSMA4;PSMC6;PSMA1;PSMC3;PSMA2;PSMC4;PSMC1;PSMC2;PSME1;PSME2;CYCS;BAX;UBA52
Turquoise	KEGG_2019_Human.9	Spliceosome	40/134	1.43187e-13	4.23197e-12	4.94867	146.355	U2AF1L5;SF3B5;RBM8A;SF3B6;SNU13;PQBP1;SNRPD2;ZMAT2;PUF60;SNRPD1;TRA2B;MAGOH;SNRPB2;SNRPD3;HNRNPA1;BCAS2;RBM17;PPIL1;CCDC12;NCBP2;BUD31;CWC15;LSM5;MAGOHB;LSM4;LSM3;LSM7;LSM6;PHF5A;SYF2;SNRPG;SRSF3;SNRNP27;PPIE;PPIH;SNRPE;RP9;SNRPF;SNRPC;RBMX
Turquoise	Reactome_2016.130	Programmed Cell Death Homo sapiens R-HSA-5357801	44/166	8.92877e-13	7.16362e-12	4.19846	116.483	PSMD10;PSMD12;PSMD14;PSMD13;HMGB1;PSMB10;PSMA7;PSMD8;PSMB6;PSMD9;PSMB7;PSMD6;PSMB4;PSMD7;PSMB5;PSMD4;FNTA;UBB;YWHAQ;PSMB2;PSMB3;PSMB1;RPS27A;BCAP31;BAD;DYNLL1;PSMB8;PSMA5;PSMA6;PSMA3;PSMC5;PSMA4;PSMC6;PSMA1;PSMC3;PSMA2;PSMC4;PSMC1;PSMC2;PSME1;PSME2;CYCS;BAX;UBA52
Turquoise	GO_Biological_Process_2018.72	tumor necrosis factor-mediated signaling pathway (GO:0033209)	38/123	1.73856e-13	7.24881e-12	5.19497	152.631	PSMD10;PSMD12;PSMD14;PSMD13;PSMB10;PSMA7;TXNDC17;PSMD8;PSMB6;PSMD9;PSMB7;PSMD6;PSMB4;PSMD7;PSMB5;PSMD4;UBB;PSMB2;PSMB3;TMSB4X;PSMB1;RPS27A;PSMB8;PSMA5;PSMA6;PSMA3;PSMC5;PSMA4;PSMC6;PSMA1;PSMC3;PSMA2;PSMC4;PSMC1;PSMC2;PSME1;PSME2;UBA52
Turquoise	DisGeNET.6	Aase Smith syndrome 2	16/20	1.05964e-14	9.51732e-12	46.0438	1481.61	RPL5;RPS7;RPL11;RPL35A;RPS26;RPS17;RPS28;RPS27;RPS19;RPS29;RPL35;RPL27;RPL15;RPL26;RPL18;RPS24
Turquoise	GO_Biological_Process_2018.73	ubiquitin-dependent protein catabolic process (GO:0006511)	70/341	2.386e-13	9.81203e-12	3.03267	88.1415	UBXN1;PPP1R11;FAF1;UBE2D2;ARRB2;FBXO22;PSMD8;PSMD9;PSMD6;PSMD7;PSMD4;ELOC;SKP1;UBE2E1;RBX1;PSMA5;PSMA6;PSMA3;PSMA4;PSMA1;PSMA2;DDIT3;PSME1;PSME2;ANAPC4;UBA52;VPS28;PSMD10;PSMD12;ANAPC15;TSG101;ANAPC16;PSMD14;PSMD13;NEDD8;RNF7;RNF5;PSMA7;PSMB10;ANAPC11;PSMB6;PCNP;PSMB7;PSMB4;PSMB5;PSMB2;UBB;PSMB3;PSMB1;MVB12A;BUB3;RPS27A;RANBP1;ZRANB1;UBE2B;NTAN1;PSMB8;NSFL1C;COPS3;PSMC5;PINK1;PSMC6;PSMC3;PSMC4;UB…
Turquoise	GO_Biological_Process_2018.74	ribosomal small subunit biogenesis (GO:0042274)	22/44	2.84877e-13	1.15568e-11	11.5431	333.441	NPM1;UTP11;RPS7;RPS10-NUDT3;MRPS11;RPS5;TSR3;RPS6;SNU13;RPSA;MRPS7;RPS15;RRP7A;RPS14;EMG1;RPS17;RPS28;RPS16;LSM6;RPS27;RPS19;RPS24
Turquoise	Reactome_2016.131	G2/M Checkpoints Homo sapiens R-HSA-69481	41/150	1.78995e-12	1.42513e-11	4.37354	118.299	PSMD10;PSMD12;PSMD14;PSMD13;PSMB10;PSMA7;PSMD8;BABAM1;PSMB6;PSMD9;PSMB7;PSMD6;PSMB4;PSMD7;PSMB5;PSMD4;UBB;YWHAQ;SUMO1;PSMB2;PSMB3;PSMB1;RPS27A;RFC2;PSMB8;PSMA5;PSMA6;PSMA3;PSMC5;PSMA4;PSMC6;PSMA1;PSMC3;PSMA2;PSMC4;PSMC1;RPA3;PSMC2;PSME1;PSME2;UBA52
Turquoise	GO_Biological_Process_2018.75	establishment of protein localization to mitochondrion (GO:0072655)	23/49	4.57183e-13	1.82995e-11	10.2154	290.256	TIMM8B;DNAJC19;FIS1;NDUFB8;TIMM9;PAM16;AIP;TIMM13;TIMM23;TIMM22;TIMM10;MFF;TOMM40L;TOMM22;TIMM50;HSPD1;CHCHD4;TIMM10B;PINK1;GRPEL1;TOMM7;TIMM17B;TOMM5
Turquoise	Reactome_2016.132	M Phase Homo sapiens R-HSA-68886	58/268	2.79374e-12	2.20748e-11	3.2285	85.8898	PSMD8;PSMD9;PSMD6;PSMD7;PSMD4;ENSA;BANF1;RAB2A;NUDC;SEC13;UBE2E1;PSMA5;PSMA6;PSMA3;PSMA4;PSMA1;PSMA2;CNEP1R1;PSME1;PSME2;ANAPC4;UBA52;PSMD10;RAB1A;PSMD12;SET;ANAPC15;ANAPC16;PSMD14;PSMD13;PSMA7;PSMB10;ANAPC11;PSMB6;PSMB7;PPP2CB;PSMB4;PSMB5;PSMB2;UBB;PSMB3;PSMB1;NUP43;BUB3;RPS27A;NCAPH2;ZWINT;PSMB8;PSMC5;RPS27;PSMC6;PSMC3;PSMC4;PSMC1;CDC16;PSMC2;PPP2R2D;B9D2
Turquoise	Reactome_2016.133	mRNA Splicing - Major Pathway Homo sapiens R-HSA-72163	38/134	3.3668e-12	2.64028e-11	4.59694	121.438	SF3B5;RBM8A;SF3B6;SNRPD2;SNRPD1;TRA2B;MAGOH;POLR2D;POLR2F;POLR2G;SNRPB2;SNRPD3;POLR2H;POLR2I;HNRNPA1;POLR2J;BCAS2;POLR2K;POLR2L;NCBP2;UPF3B;CWC15;GTF2F1;LSM5;GTF2F2;LSM4;LSM3;LSM7;LSM6;PHF5A;SNRPG;SRSF3;SNRNP27;PPIH;SNRPE;SNRPF;DNAJC8;RBMX
Turquoise	GO_Biological_Process_2018.76	positive regulation of Wnt signaling pathway (GO:0030177)	40/140	6.97748e-13	2.7561e-11	4.65022	130.164	PSMD10;PSMD12;PSMD14;PSMD13;PSMB10;PSMA7;PSMD8;PSMB6;PSMD9;PSMB7;PSMD6;PSMB4;PSMD7;PSMB5;PSMD4;UBB;PSMB2;PSMB3;RUVBL1;PSMB1;RPS27A;ATP6V1C2;ZRANB1;PSMB8;PSMA5;PSMA6;PSMA3;PSMC5;PSMA4;PSMC6;PSMA1;PSMC3;PSMA2;PSMC4;PSMC1;PSMC2;PSME1;PSME2;PIN1;UBA52
Turquoise	Reactome_2016.134	Formation of TC-NER Pre-Incision Complex Homo sapiens R-HSA-6781823	23/53	3.56033e-12	2.77121e-11	8.85138	233.333	GPS1;GTF2H5;RBX1;COPS4;COPS3;COPS6;COPS5;UBB;POLR2D;PPIE;POLR2F;TCEA1;POLR2G;POLR2H;ZNF830;RPS27A;POLR2I;COPS8;UBA52;POLR2J;POLR2K;HMGN1;POLR2L
Turquoise	DisGeNET.7	Abnormality of the genital system	17/24	4.77778e-14	3.21843e-11	27.9681	857.845	RPL5;RPS7;RPL11;RPL35A;ETFB;RPS26;RPS17;RPS28;RPS27;RPS19;RPS29;RPL35;RPL27;RPL15;RPL26;RPL18;RPS24
Turquoise	DisGeNET.8	Abnormality of the reproductive system	17/24	4.77778e-14	3.21843e-11	27.9681	857.845	RPL5;RPS7;RPL11;RPL35A;ETFB;RPS26;RPS17;RPS28;RPS27;RPS19;RPS29;RPL35;RPL27;RPL15;RPL26;RPL18;RPS24
Turquoise	Reactome_2016.135	Processing of Capped Intron-Containing Pre-mRNA Homo sapiens R-HSA-72203	47/193	4.1742e-12	3.22496e-11	3.74975	98.2512	SLBP;SF3B5;RBM8A;SF3B6;SNRPD2;SNRPD1;TRA2B;MAGOH;ZMAT5;POLR2D;POLR2F;NUP43;POLR2G;SNRPB2;SNRPD3;POLR2H;POLR2I;HNRNPA1;POLR2J;BCAS2;POLR2K;POLR2L;CHTOP;WTAP;NCBP2;UPF3B;ZCRB1;CWC15;GTF2F1;LSM5;GTF2F2;LSM4;THOC7;LSM3;LSM7;PHF5A;LSM6;SARNP;SNRPG;SRSF3;SNRNP27;PPIH;SNRPE;SNRPF;SNRNP25;DNAJC8;RBMX
Turquoise	GO_Biological_Process_2018.77	proteasome-mediated ubiquitin-dependent protein catabolic process (GO:0043161)	62/291	1.02399e-12	3.99224e-11	3.16966	87.5057	UBXN1;FAF1;AUP1;ARRB2;PSMD8;PSMD9;PSMD6;PSMD7;PSMD4;FBXO6;SEC61B;SKP1;UBE2E1;RBX1;PSMA5;PSMA6;PSMA3;PSMA4;PSMA1;PSMA2;DDIT3;PSME1;PSME2;ANAPC4;UBA52;PSMD10;PSMD12;ANAPC15;ANAPC16;PSMD14;PSMD13;DERL1;RNF7;PSMA7;PSMB10;ANAPC11;PSMB6;PCNP;PSMB7;PSMB4;PSMB5;PSMB2;UBB;PSMB3;PSMB1;BUB3;RPS27A;UBE2B;TMUB1;PSMB8;NSFL1C;PSMC5;PSMC6;PSMC3;PSMC4;UBE2S;PSMC1;JKAMP;CDC16;PSMC2;RNF181;STUB1
Turquoise	GO_Biological_Process_2018.78	proteasomal ubiquitin-independent protein catabolic process (GO:0010499)	16/24	1.17717e-12	4.53061e-11	23.0169	632.226	PSMA7;PSMB10;PSMB8;PSMA5;PSMB6;PSMA6;PSMB7;PSMA3;PSMB4;PSMA4;PSMB5;PSMA1;PSMB2;PSMA2;PSMB3;PSMB1
Turquoise	Reactome_2016.136	Nucleotide Excision Repair Homo sapiens R-HSA-5696398	33/108	9.44744e-12	7.24536e-11	5.09954	129.453	PCNA;CETN2;GPS1;TFPT;POLD4;UBB;SUMO1;SUMO3;RUVBL1;SUMO2;POLR2D;POLR2F;POLR2G;POLR2H;RPS27A;POLR2I;POLR2J;POLR2K;HMGN1;POLR2L;RFC2;GTF2H5;RBX1;COPS4;COPS3;COPS6;COPS5;RPA3;PPIE;TCEA1;ZNF830;COPS8;UBA52
Turquoise	GO_Biological_Process_2018.79	regulation of primary metabolic process (GO:0080090)	39/139	2.53236e-12	9.62298e-11	4.53109	120.988	PSMD10;PSMD12;PSMD14;PSMD13;OAZ1;OAZ2;PSMB10;PSMA7;PSMD8;PSMB6;PSMD9;PSMB7;PSMD6;PSMB4;PSMD7;PSMB5;PSMD4;PSMB2;PSMB3;PSMB1;FDFT1;EDF1;CACYBP;PSMB8;PSMA5;PSMA6;PSMA3;PSMC5;PSMA4;PSMC6;PSMA1;PSMC3;PSMA2;PSMC4;PSMC1;PSMC2;PSME1;PSME2;PLPP1
Turquoise	Reactome_2016.137	Transcription-Coupled Nucleotide Excision Repair (TC-NER) Homo sapiens R-HSA-6781827	27/76	1.42153e-11	1.08223e-10	6.37113	159.13	PCNA;GPS1;POLD4;UBB;POLR2D;POLR2F;POLR2G;POLR2H;RPS27A;POLR2I;POLR2J;POLR2K;HMGN1;POLR2L;RFC2;GTF2H5;RBX1;COPS4;COPS3;COPS6;COPS5;RPA3;PPIE;TCEA1;ZNF830;COPS8;UBA52
Turquoise	DisGeNET.9	NADH:Q(1) Oxidoreductase deficiency	19/32	1.90146e-13	1.13855e-10	16.8471	493.469	NDUFB9;TIMMDC1;NDUFB10;NDUFA11;NDUFB11;NDUFB3;NDUFA1;NDUFS8;NDUFS7;NDUFS6;NDUFS4;NDUFAF5;NDUFS3;NDUFAF2;NDUFS2;NDUFAF3;TMEM126B;NDUFV2;NDUFV1
Turquoise	Reactome_2016.138	Transcriptional Regulation by TP53 Homo sapiens R-HSA-3700989	67/348	1.65245e-11	1.24891e-10	2.79242	69.3252	COX7B;COX4I1;PRKAG1;COX6A1;COX7C;YWHAQ;SESN1;COX8A;PRMT1;RFC2;GTF2F1;RABGGTB;GTF2F2;COX6B1;RRAGA;COX7A2L;RRAGB;SCO2;UBA52;HDAC2;PCNA;TAF9;SUPT4H1;TXN;COX5B;COX5A;PRDX2;PPP2CB;PRDX5;UBB;RBBP4;PCBP4;PRDX1;POLR2D;POLR2F;COX14;POLR2G;POLR2H;RPS27A;POLR2I;POLR2J;POLR2K;POLR2L;PRELID1;SURF1;NPM1;NDUFA4;TAF10;TAF11;COX6C;GTF2H5;RGCC;CDK5;TTC5;RHEB;RPA3;TCEA1;PIN1;CYCS;BAX;LAMTOR2;LAMTOR1;LAMTOR4;CNOT8;L…
Turquoise	Reactome_2016.139	mRNA Splicing - Minor Pathway Homo sapiens R-HSA-72165	22/52	1.94745e-11	1.46129e-10	8.46122	208.67	SF3B5;NCBP2;SF3B6;ZCRB1;GTF2F1;GTF2F2;SNRPD2;SNRPD1;ZMAT5;POLR2D;SNRPG;POLR2F;SNRPE;POLR2G;SNRPD3;SNRPF;SNRNP25;POLR2H;POLR2I;POLR2J;POLR2K;POLR2L
Turquoise	Reactome_2016.140	Diseases of signal transduction Homo sapiens R-HSA-5663202	59/288	1.99332e-11	1.48502e-10	3.01046	74.1737	PSMD8;PSMD9;PSMD6;SHH;PSMD7;PSMD4;HRAS;SKP1;PSENEN;HSP90AA1;NCBP2;GTF2F1;GTF2F2;RBX1;PSMA5;PSMA6;PSMA3;PSMA4;PSMA1;PSMA2;CDC37;AKT1S1;PSME1;PSME2;UBA52;PSMD10;PSMD12;HDAC2;PSMD14;PSMD13;PSMA7;PSMB10;PSMB6;PSMB7;PPP2CB;PSMB4;PSMB5;PSMB2;UBB;PSMB3;PSMB1;POLR2D;POLR2F;POLR2G;POLR2H;RPS27A;POLR2I;POLR2J;HES5;POLR2K;POLR2L;BAD;PSMB8;PSMC5;PSMC6;PSMC3;PSMC4;PSMC1;PSMC2
Turquoise	GO_Biological_Process_2018.80	transcription-coupled nucleotide-excision repair (GO:0006283)	27/73	4.72708e-12	1.77384e-10	6.78775	177.009	PCNA;GPS1;POLD4;UBB;POLR2D;POLR2F;POLR2G;POLR2H;RPS27A;POLR2I;POLR2J;POLR2K;HMGN1;POLR2L;RFC2;GTF2H5;RBX1;COPS4;COPS3;COPS6;COPS5;RPA3;PPIE;TCEA1;ZNF830;COPS8;UBA52
Turquoise	GO_Biological_Process_2018.81	negative regulation of canonical Wnt signaling pathway (GO:0090090)	40/148	4.92688e-12	1.82599e-10	4.30388	112.057	PSMD10;PSMD12;PSMD14;PSMD13;PSMB10;PSMA7;PSMD8;PSMB6;PSMD9;PSMB7;PSMD6;PSMB4;PSMD7;PSMB5;PSMD4;UBB;PSMB2;PSMB3;PSMB1;RPS27A;PSMB8;RBX1;PSMA5;PSMA6;PSMA3;PSMC5;PSMA4;PSMC6;PSMA1;SDHAF2;PSMC3;PSMA2;PSMC4;DDIT3;PSMC1;PSMC2;PSME1;PSME2;UBA52;PFDN5
Turquoise	DisGeNET.10	MITOCHONDRIAL COMPLEX I DEFICIENCY	19/33	4.14316e-13	2.23275e-10	15.6429	446.013	NDUFB9;NDUFA13;TIMMDC1;NDUFA11;NDUFB11;NDUFB3;NDUFA1;NDUFS8;NDUFS7;NDUFS6;NDUFS4;NDUFAF5;NDUFS3;NDUFAF2;NDUFS2;NDUFAF3;TMEM126B;NDUFV2;NDUFV1
Turquoise	GO_Biological_Process_2018.82	ribosomal large subunit assembly (GO:0000027)	17/30	1.03386e-11	3.78494e-10	15.0548	380.814	RPL5;RPL3;RPL10;RPL12;WDR18;RPL11;RPL23A;RPF2;RPL6;MRPL11;RPF1;MRPL20;MRTO4;RPL24;BRIX1;NOP53;RSL24D1
Turquoise	Reactome_2016.141	Signaling by Insulin receptor Homo sapiens R-HSA-74752	61/311	6.0602e-11	4.48283e-10	2.85144	67.0849	ARAF;PRKAG1;PEBP1;ARRB2;PSMD8;PSMD9;PSMD6;PSMD7;PSMD4;ATP6V1E1;HRAS;ATP6V1G1;ATP6V0B;RPS6;RBX1;PSMA5;PSMA6;RRAGA;PSMA3;PSMA4;PSMA1;RRAGB;PSMA2;AKT1S1;PSME1;PSME2;UBA52;PSMD10;PSMD12;PSMD14;PSMD13;PHB;PSMA7;PSMB10;PSMB6;PSMB7;PPP2CB;PSMB4;PSMB5;PSMB2;UBB;PSMB3;PSMB1;ATP6V1H;RPS27A;ATP6V1D;ATP6V1C2;ATP6V1F;PSMB8;PSMC5;PSMC6;PSMC3;PSMC4;RHEB;PSMC1;PSMC2;LAMTOR2;LAMTOR1;LAMTOR4;LAMTOR3;LAMTOR5
Turquoise	Reactome_2016.142	Late Phase of HIV Life Cycle Homo sapiens R-HSA-162599	35/128	7.34362e-11	5.39394e-10	4.36302	101.809	GTF2A2;TSG101;GTF2B;TAF9;SUPT4H1;GTF2E2;UBB;POLR2D;POLR2F;NUP43;POLR2G;POLR2H;RPS27A;POLR2I;POLR2J;POLR2K;POLR2L;RANBP1;NCBP2;TAF10;TAF11;VPS37D;GTF2F1;GTF2F2;GTF2H5;CHMP2A;CHMP4B;TCEA1;CHMP6;PPIA;UBA52;CHMP7;VPS28;RAN;CHMP5
Turquoise	GO_Biological_Process_2018.83	protein transmembrane import into intracellular organelle (GO:0044743)	20/43	1.90445e-11	6.88815e-10	10.0243	247.442	DNAJC19;PEX16;NDUFA13;HSP90AA1;TIMM9;PAM16;TIMM13;TIMM23;TIMM22;TIMM10;TOMM40L;HSPD1;TOMM22;TIMM50;CHCHD4;PEX7;SAMM50;GRPEL1;TOMM7;TIMM17B
Turquoise	GO_Biological_Process_2018.84	mitochondrial transport (GO:0006839)	37/135	1.96648e-11	7.02782e-10	4.38136	108.01	STOML2;NDUFB8;TIMM9;TIMM13;TIMM10;COX5B;MFF;TOMM22;TIMM50;HSPD1;CHCHD4;SAMM50;GRPEL1;TIMM17B;CYC1;DNAJC19;TIMM8B;FIS1;HSP90AA1;BAD;MTX2;PAM16;AIP;TIMM23;TIMM22;TOMM40L;TIMM10B;SLC25A38;PINK1;SLC25A17;SLC25A19;TOMM7;SLC25A4;SLC25A11;SLC25A33;SLC25A14;TOMM5
Turquoise	DisGeNET.11	Hand deformities	22/47	1.58465e-12	7.76333e-10	10.1562	275.951	RPL5;RPS7;UROS;RPL11;RPL35A;TREM2;RPS26;GNPTG;RPS17;RPS28;RPS27;TYROBP;RPS19;ZNHIT3;RPS29;RPL35;RPL27;RPL15;DGCR6;RPL26;RPL18;RPS24
Turquoise	GO_Biological_Process_2018.85	mitochondrial electron transport, cytochrome c to oxygen (GO:0006123)	14/21	3.15903e-11	1.11569e-09	22.9894	555.841	COX8A;COX7B;NDUFA4;COX4I1;AFG1L;COX5B;COX6C;COX6A1;COX5A;COX7C;COX6B1;COX7A2L;CYCS;MT-CO2
Turquoise	GO_Biological_Process_2018.86	cellular response to interleukin-1 (GO:0071347)	39/150	3.30952e-11	1.15525e-09	4.0796	98.4475	PSMD10;PSMD12;PSMD14;PSMD13;PSMB10;PSMA7;PSMD8;PSMB6;PSMD9;PSMB7;PSMD6;PSMB4;PSMD7;PSMB5;PSMD4;UBB;PSMB2;PSMB3;PSMB1;RPS27A;SKP1;PSMB8;RBX1;PSMA5;PSMA6;PSMA3;PSMC5;PSMA4;PSMC6;PSMA1;PSMC3;PSMA2;PSMC4;PSMC1;PSMC2;PSME1;PSME2;UBA52;RBMX
Turquoise	GO_Biological_Process_2018.87	nucleotide-excision repair (GO:0006289)	32/108	4.80068e-11	1.65651e-09	4.87659	115.866	PCNA;CETN2;GPS1;POLD4;UBB;SUMO1;SUMO3;SUMO2;POLR2D;POLR2F;POLR2G;POLR2H;RPS27A;POLR2I;POLR2J;POLR2K;HMGN1;POLR2L;SLC30A9;RFC2;GTF2H5;RBX1;COPS4;COPS3;COPS6;COPS5;RPA3;PPIE;TCEA1;ZNF830;COPS8;UBA52
Turquoise	DisGeNET.12	Acute necrotizing encephalopathy	15/22	3.69828e-12	1.66084e-09	24.6469	648.784	NDUFB9;TIMMDC1;NDUFA11;NDUFB3;NDUFA1;NDUFS6;NDUFS4;NDUFAF5;NDUFS3;NDUFAF2;NDUFS2;NDUFAF3;TMEM126B;NDUFV2;NDUFV1
Turquoise	Reactome_2016.143	Prefoldin mediated transfer of substrate to CCT/TriC Homo sapiens R-HSA-389957	15/27	2.55621e-10	1.86442e-09	14.3734	317.471	CCT3;CCT2;VBP1;CCT6A;TUBA1A;TCP1;PFDN1;PFDN2;CCT8;CCT7;PFDN4;PFDN5;CCT5;PFDN6;CCT4
Turquoise	KEGG_2019_Human.10	Retrograde endocannabinoid signaling	38/148	8.82105e-11	2.3464e-09	4.00881	92.8091	NDUFB9;NDUFA13;NDUFB8;NDUFB7;NDUFA11;NDUFB10;NDUFB6;NDUFA12;NDUFB11;NDUFB5;NDUFB4;NDUFB3;NDUFB2;NDUFB1;NDUFC2-KCTD14;GNG10;NDUFV3;NDUFV2;NDUFV1;NDUFA9;NDUFA8;NDUFA7;NDUFA6;NDUFA5;NDUFA4;NDUFA3;NDUFA2;NDUFA1;NDUFC1;GNG13;NDUFS8;NDUFS7;NDUFS6;NDUFS5;NDUFS4;NDUFAB1;NDUFS3;NDUFS2
Turquoise	Reactome_2016.144	HIV Life Cycle Homo sapiens R-HSA-162587	36/141	3.25114e-10	2.35482e-09	3.97471	86.8348	GTF2A2;TSG101;GTF2B;TAF9;SUPT4H1;GTF2E2;UBB;POLR2D;POLR2F;BANF1;NUP43;POLR2G;POLR2H;RPS27A;POLR2I;POLR2J;POLR2K;POLR2L;RANBP1;NCBP2;TAF10;TAF11;VPS37D;GTF2F1;GTF2F2;GTF2H5;CHMP2A;CHMP4B;TCEA1;CHMP6;PPIA;UBA52;CHMP7;VPS28;RAN;CHMP5
Turquoise	GO_Biological_Process_2018.88	negative regulation of Wnt signaling pathway (GO:0030178)	42/174	7.74881e-11	2.6434e-09	3.69727	86.0757	PSMD10;PSMD12;PSMD14;PSMD13;CBY1;PSMB10;PSMA7;PSMD8;PSMB6;PSMD9;PSMB7;PSMD6;PSMB4;PSMD7;PSMB5;PSMD4;UBB;PSMB2;PSMB3;PSMB1;RACK1;RPS27A;PSMB8;RBX1;PSMA5;PSMA6;PSMA3;PSMC5;PSMA4;PSMC6;PSMA1;SDHAF2;PSMC3;PSMA2;PSMC4;DDIT3;PSMC1;PSMC2;PSME1;PSME2;UBA52;PFDN5
Turquoise	GO_Biological_Process_2018.89	maturation of LSU-rRNA (GO:0000470)	14/22	8.04026e-11	2.71201e-09	20.1146	467.543	MAK16;SNU13;RPL10A;RPF2;RPF1;RPL7;RSL1D1;RPL7A;NSA2;MRPL1;RPL7L1;PES1;NHP2;RPL35
Turquoise	DisGeNET.13	Increased serum lactate	35/119	7.59345e-12	3.14778e-09	4.83286	123.739	MRPS16;ECHS1;NAXE;NDUFA12;HTRA2;LIAS;TMEM70;TXN2;MRPL3;RNASEH1;MPC1;COX14;CYC1;ATPAF2;NDUFA9;TSFM;SURF1;UQCC3;PET100;MRPS22;NDUFA2;SDHD;COX6B1;MRPL44;NDUFS8;NDUFS7;SCO2;UQCRQ;NDUFS4;SDHAF1;NDUFAF2;NDUFS3;UQCRC2;ISCU;COX20
Turquoise	GO_Biological_Process_2018.90	ribosomal small subunit assembly (GO:0000028)	13/19	9.97207e-11	3.32624e-09	24.8909	573.205	ABT1;RPS10-NUDT3;MRPS11;RPS5;RPSA;MRPS7;RPS15;RRP7A;RPS14;RPS17;RPS28;RPS27;RPS19
Turquoise	Reactome_2016.145	RNA Polymerase II Transcription Homo sapiens R-HSA-73857	33/124	5.51295e-10	3.96552e-09	4.19925	89.5227	SLBP;GTF2A2;RBM8A;GTF2B;TAF9;SUPT4H1;GTF2E2;LSM10;MAGOH;POLR2D;POLR2F;POLR2G;SNRPD3;POLR2H;POLR2I;POLR2J;POLR2K;POLR2L;CHTOP;NCBP2;TAF10;TAF11;UPF3B;GTF2F1;GTF2F2;THOC7;GTF2H5;SARNP;SNRPG;SRSF3;TCEA1;SNRPE;SNRPF
Turquoise	GO_Biological_Process_2018.91	T cell receptor signaling pathway (GO:0050852)	40/163	1.27174e-10	4.19534e-09	3.77591	86.036	PSMD10;PSMD12;STOML2;PSMD14;PSMD13;UBE2D2;PSMB10;PSMA7;PSMD8;PSMB6;PSMD9;PSMB7;PSMD6;PSMB4;PSMD7;PSMB5;PSMD4;UBB;PSMB2;PSMB3;PSMB1;RPS27A;SKP1;EIF2B3;PSMB8;PSMA5;PSMA6;PSMA3;PSMC5;PSMA4;PSMC6;PSMA1;PSMC3;PSMA2;PSMC4;PSMC1;PSMC2;PSME1;PSME2;UBA52
Turquoise	DisGeNET.14	HIV Coinfection	32/103	1.18469e-11	4.56023e-09	5.22144	131.366	EIF4A1;PSMD13;TAF9;PSMB10;HSPD1;PSMD8;CDC42;PSMD6;EMG1;PSMB4;GRPEL1;SNRPD3;CCT7;CCT5;CCT3;RANBP1;HSP90AA1;NUTF2;ILF2;PSMA5;PSMA6;COPS6;PSMC5;PSMA4;DNAJC7;PSMC3;PSME1;PSME2;BAX;HDGF;PPIB;RAN
Turquoise	Reactome_2016.146	Antigen processing: Ubiquitination & Proteasome degradation Homo sapiens R-HSA-983168	52/260	7.59734e-10	5.42741e-09	2.91143	61.1345	UBE2D2;PSMD8;PSMD9;PSMD6;RNF114;PSMD7;PSMD4;FBXO6;SKP1;UBE2E3;UBE2E1;RBX1;PSMA5;PSMA6;PSMA3;PSMA4;PSMA1;PSMA2;PSME1;PSME2;ANAPC4;UBA52;PSMD10;ANAPC13;PSMD12;PSMD14;PSMD13;PSMA7;PSMB10;ANAPC11;PSMB6;PSMB7;PSMB4;PSMB5;PSMB2;UBB;PSMB3;PSMB1;RPS27A;UBE2B;RNF25;PSMB8;PSMC5;PSMC6;PSMC3;PSMC4;UBE2S;PSMC1;CDC16;PSMC2;BLMH;STUB1
Turquoise	GO_Biological_Process_2018.92	mitochondrial electron transport, ubiquinol to cytochrome c (GO:0006122)	11/14	2.63414e-10	8.59532e-09	42.0774	928.114	UQCRB;UQCC3;UQCRQ;UQCRFS1;PMPCB;CYCS;UQCR11;UQCR10;UQCRC2;CYC1;UQCRHL
Turquoise	GO_Biological_Process_2018.93	protein modification by small protein removal (GO:0070646)	53/261	2.93115e-10	9.46163e-09	2.96933	65.1781	AKR1B1;ARRB2;PSMD8;BABAM1;PSMD9;PSMD6;PSMD7;PSMD4;RUVBL1;UCHL3;PSMA5;PSMA6;PSMA3;PSMA4;PSMA1;PSMA2;PSME1;PSME2;UBA52;PSMD10;PSMD12;PSMD14;PSMD13;GPS1;NEDD8;PSMA7;PSMB10;PSMB6;PSMB7;TFPT;PSMB4;PSMB5;PSMB2;UBB;PSMB3;PSMB1;SUDS3;RPS27A;ZRANB1;TOR1A;TAF10;PSMB8;COPS4;COPS3;PSMC5;COPS6;PSMC6;COPS5;PSMC3;PSMC4;PSMC1;PSMC2;COPS8
Turquoise	Reactome_2016.147	Class I MHC mediated antigen processing & presentation Homo sapiens R-HSA-983169	57/305	1.71875e-09	1.2195e-08	2.67933	54.0734	UBE2D2;PSMD8;PSMD9;PSMD6;RNF114;PSMD7;PSMD4;SEC61G;FBXO6;SEC61B;B2M;SKP1;SEC13;UBE2E3;UBE2E1;CYBA;RBX1;PSMA5;PSMA6;PSMA3;PSMA4;PSMA1;PSMA2;PSME1;PSME2;ANAPC4;UBA52;PSMD10;ANAPC13;PSMD12;PSMD14;PSMD13;PSMA7;PSMB10;ANAPC11;PSMB6;PSMB7;PSMB4;PSMB5;PSMB2;UBB;PSMB3;PSMB1;RPS27A;UBE2B;RNF25;PSMB8;PSMC5;PSMC6;PSMC3;PSMC4;UBE2S;PSMC1;CDC16;PSMC2;BLMH;STUB1
Turquoise	Reactome_2016.148	IRS-mediated signalling Homo sapiens R-HSA-112399	54/284	2.42922e-09	1.71194e-08	2.73441	54.239	ARAF;PRKAG1;PEBP1;ARRB2;PSMD8;PSMD9;PSMD6;PSMD7;PSMD4;HRAS;RPS6;RBX1;PSMA5;PSMA6;RRAGA;PSMA3;PSMA4;PSMA1;RRAGB;PSMA2;AKT1S1;PSME1;PSME2;UBA52;PSMD10;PSMD12;PSMD14;PSMD13;PHB;PSMA7;PSMB10;PSMB6;PSMB7;PPP2CB;PSMB4;PSMB5;PSMB2;UBB;PSMB3;PSMB1;RPS27A;PSMB8;PSMC5;PSMC6;PSMC3;PSMC4;RHEB;PSMC1;PSMC2;LAMTOR2;LAMTOR1;LAMTOR4;LAMTOR3;LAMTOR5
Turquoise	DisGeNET.15	Progressive macrocephaly	15/25	5.61423e-11	2.017e-08	17.25	407.154	NDUFB9;TIMMDC1;NDUFA11;NDUFB3;NDUFA1;NDUFS6;NDUFS4;NDUFAF5;NDUFS3;NDUFAF2;NDUFS2;NDUFAF3;TMEM126B;NDUFV2;NDUFV1
Turquoise	Reactome_2016.149	Cellular responses to stress Homo sapiens R-HSA-2262752	64/367	3.19512e-09	2.23658e-08	2.46593	48.2376	UBE2D2;PRKAG1;NUDT2;WDR45;TXN2;MAP2K3;GABARAPL2;HSP90AA1;GPX1;HSBP1;EED;ATG9B;UBE2E1;CYBA;DYNLL1;RBX1;EEF1A1;DNAJC2;RRAGA;DNAJC7;RRAGB;AKT1S1;CHMP4B;ANAPC4;FKBP4;CHMP6;UBA52;CHMP7;ANAPC15;ANAPC16;RPS19BP1;MRPL18;GSTP1;TXN;HSPA14;GABARAP;ANAPC11;PRDX3;PRDX2;PRDX5;UBB;RBBP4;DNAJB6;ATG101;PRDX1;BAG1;NUP43;RPS27A;CDKN2D;EGLN2;PTGES3;SOD1;RHEB;CDK4;RPA3;CDC16;CHMP2A;CYCS;LAMTOR2;LAMTOR1;P4HB;LAMTOR4;L…
Turquoise	GO_Biological_Process_2018.94	protein polyubiquitination (GO:0000209)	55/283	7.52623e-10	2.40359e-08	2.81159	59.0644	UBE2D2;FBXO22;PSMD8;PSMD9;PSMD6;RNF114;PSMD7;PSMD4;FBXO6;SKP1;UBE2E3;UBE2E1;RBX1;PSMA5;PSMA6;PSMA3;PSMA4;PSMA1;PSMA2;PSME1;PSME2;ANAPC4;UBA52;RNF166;PSMD10;ANAPC13;PSMD12;PSMD14;PSMD13;RNF5;PSMA7;PSMB10;ANAPC11;PSMB6;PSMB7;PSMB4;PSMB5;PSMB2;UBB;PSMB3;PSMB1;RPS27A;UBE2B;PSMB8;PSMC5;PSMC6;PSMC3;PSMC4;UBE2S;PSMC1;CDC16;PSMC2;RNF181;BLMH;STUB1
Turquoise	Reactome_2016.150	Insulin receptor signalling cascade Homo sapiens R-HSA-74751	54/287	3.58007e-09	2.48934e-08	2.69876	52.4851	ARAF;PRKAG1;PEBP1;ARRB2;PSMD8;PSMD9;PSMD6;PSMD7;PSMD4;HRAS;RPS6;RBX1;PSMA5;PSMA6;RRAGA;PSMA3;PSMA4;PSMA1;RRAGB;PSMA2;AKT1S1;PSME1;PSME2;UBA52;PSMD10;PSMD12;PSMD14;PSMD13;PHB;PSMA7;PSMB10;PSMB6;PSMB7;PPP2CB;PSMB4;PSMB5;PSMB2;UBB;PSMB3;PSMB1;RPS27A;PSMB8;PSMC5;PSMC6;PSMC3;PSMC4;RHEB;PSMC1;PSMC2;LAMTOR2;LAMTOR1;LAMTOR4;LAMTOR3;LAMTOR5
Turquoise	Reactome_2016.151	IGF1R signaling cascade Homo sapiens R-HSA-2428924	54/288	4.06753e-09	2.77283e-08	2.68708	51.915	ARAF;PRKAG1;PEBP1;ARRB2;PSMD8;PSMD9;PSMD6;PSMD7;PSMD4;HRAS;RPS6;RBX1;PSMA5;PSMA6;RRAGA;PSMA3;PSMA4;PSMA1;RRAGB;PSMA2;AKT1S1;PSME1;PSME2;UBA52;PSMD10;PSMD12;PSMD14;PSMD13;PHB;PSMA7;PSMB10;PSMB6;PSMB7;PPP2CB;PSMB4;PSMB5;PSMB2;UBB;PSMB3;PSMB1;RPS27A;PSMB8;PSMC5;PSMC6;PSMC3;PSMC4;RHEB;PSMC1;PSMC2;LAMTOR2;LAMTOR1;LAMTOR4;LAMTOR3;LAMTOR5
Turquoise	Reactome_2016.152	Signaling by Type 1 Insulin-like Growth Factor 1 Receptor (IGF1R) Homo sapiens R-HSA-2404192	54/288	4.06753e-09	2.77283e-08	2.68708	51.915	ARAF;PRKAG1;PEBP1;ARRB2;PSMD8;PSMD9;PSMD6;PSMD7;PSMD4;HRAS;RPS6;RBX1;PSMA5;PSMA6;RRAGA;PSMA3;PSMA4;PSMA1;RRAGB;PSMA2;AKT1S1;PSME1;PSME2;UBA52;PSMD10;PSMD12;PSMD14;PSMD13;PHB;PSMA7;PSMB10;PSMB6;PSMB7;PPP2CB;PSMB4;PSMB5;PSMB2;UBB;PSMB3;PSMB1;RPS27A;PSMB8;PSMC5;PSMC6;PSMC3;PSMC4;RHEB;PSMC1;PSMC2;LAMTOR2;LAMTOR1;LAMTOR4;LAMTOR3;LAMTOR5
Turquoise	Reactome_2016.153	IRS-related events triggered by IGF1R Homo sapiens R-HSA-2428928	54/288	4.06753e-09	2.77283e-08	2.68708	51.915	ARAF;PRKAG1;PEBP1;ARRB2;PSMD8;PSMD9;PSMD6;PSMD7;PSMD4;HRAS;RPS6;RBX1;PSMA5;PSMA6;RRAGA;PSMA3;PSMA4;PSMA1;RRAGB;PSMA2;AKT1S1;PSME1;PSME2;UBA52;PSMD10;PSMD12;PSMD14;PSMD13;PHB;PSMA7;PSMB10;PSMB6;PSMB7;PPP2CB;PSMB4;PSMB5;PSMB2;UBB;PSMB3;PSMB1;RPS27A;PSMB8;PSMC5;PSMC6;PSMC3;PSMC4;RHEB;PSMC1;PSMC2;LAMTOR2;LAMTOR1;LAMTOR4;LAMTOR3;LAMTOR5
Turquoise	GO_Biological_Process_2018.95	positive regulation of telomerase RNA localization to Cajal body (GO:1904874)	11/15	9.15369e-10	2.89256e-08	31.5563	656.741	CCT3;CCT6A;CCT2;TCP1;RUVBL1;NHP2;CCT8;CCT7;NOP10;CCT5;CCT4
Turquoise	GO_Biological_Process_2018.96	mitochondrion organization (GO:0007005)	39/167	1.02544e-09	3.20663e-08	3.53449	73.1574	STOML2;NDUFB8;TIMM9;TIMM13;AFG1L;MIEF2;PARK7;PHB;TIMM10;MFF;HSD17B10;TMEM70;TOMM22;TIMM50;HSPD1;PRDX3;CHCHD2;SAMM50;CHCHD6;TIMM17B;DNAJC19;TIMM8B;FIS1;AIP;TIMM23;TIMM22;SIRT3;TIMM10B;IMMP1L;PINK1;TMEM11;TOMM7;TFAM;CYCS;BAX;SSBP1;SLC25A4;SLC25A33;TOMM5
Turquoise	DisGeNET.16	Cerebral Edema	19/42	1.1149e-10	3.72412e-08	9.5171	218.104	NDUFB9;TIMMDC1;NDUFA11;NAXE;NDUFB3;NDUFA1;S100B;NDUFS6;NDUFS4;NDUFAF5;NDUFS3;NDUFAF2;NDUFS2;NDUFAF3;ASL;TMEM126B;NDUFV2;NDUFV1;MYL9
Turquoise	DisGeNET.17	Leukodystrophy	46/204	1.1748e-10	3.72412e-08	3.38684	77.4392	ISCA2;RNASEH2C;NDUFB9;MRPS16;RNASEH2A;NDUFA11;NAXE;NDUFB3;HSPD1;NFU1;PRDX5;SCP2;NDUFV2;NDUFV1;ATPAF2;BCAP31;SURF1;EIF2B3;TIMMDC1;GLRX5;NDUFA2;NDUFA1;PYCR2;EIF2S2;SDHB;GTF2H5;SUMF1;AIMP1;EEF1A1;TYROBP;NDUFS8;SUCLA2;NDUFS7;SCO2;NDUFS6;BOLA3;NDUFAF5;SDHAF1;NDUFS4;POLR1C;NDUFAF2;NDUFS3;NDUFAF3;NDUFS2;TMEM126B;SLC25A4
Turquoise	GO_Biological_Process_2018.97	cellular respiration (GO:0045333)	21/57	1.20635e-09	3.73347e-08	6.72409	138.084	SURF1;UQCRB;SDHC;ETFB;UQCR10;COX6A1;SDHB;UQCRHL;SIRT3;NDUFS7;BLOC1S1;NDUFS4;NDUFS3;NDUFAF2;PMPCB;CYCS;SDHAF4;UQCRC2;NDUFV2;SLC25A14;COX20
Turquoise	Reactome_2016.154	Cooperation of Prefoldin and TriC/CCT in actin and tubulin folding Homo sapiens R-HSA-389958	15/32	5.64404e-09	3.82256e-08	10.1432	192.646	CCT3;CCT2;VBP1;CCT6A;TUBA1A;TCP1;PFDN1;PFDN2;CCT8;CCT7;PFDN4;PFDN5;CCT5;PFDN6;CCT4
Turquoise	Reactome_2016.155	Downstream signaling events of B Cell Receptor (BCR) Homo sapiens R-HSA-1168372	41/192	6.5069e-09	4.37851e-08	3.14981	59.3751	PSMD10;PSMD12;PSMD14;PSMD13;PSMB10;PSMA7;PSMD8;PSMB6;PSMD9;PSMB7;PPP2CB;PSMD6;PSMB4;PSMD7;PSMB5;PSMD4;UBB;PSMB2;PSMB3;PSMB1;RPS27A;HRAS;SKP1;BAD;PSMB8;PSMA5;PSMA6;PSMA3;PSMC5;PSMA4;PSMC6;PSMA1;PSMC3;PSMA2;PSMC4;PSMC1;AKT1S1;PSMC2;PSME1;PSME2;UBA52
Turquoise	Reactome_2016.156	Gap-filling DNA repair synthesis and ligation in TC-NER Homo sapiens R-HSA-6782210	21/62	7.03004e-09	4.70021e-08	5.90247	110.807	PCNA;RFC2;GTF2H5;RBX1;POLD4;UBB;RPA3;POLR2D;PPIE;POLR2F;TCEA1;POLR2G;POLR2H;ZNF830;RPS27A;POLR2I;UBA52;POLR2J;POLR2K;HMGN1;POLR2L
Turquoise	GO_Biological_Process_2018.98	positive regulation of protein localization to Cajal body (GO:1904871)	8/8	1.7612e-09	5.34052e-08	Inf	Inf	CCT3;CCT6A;CCT2;TCP1;CCT8;CCT7;CCT5;CCT4
Turquoise	GO_Biological_Process_2018.99	regulation of protein localization to Cajal body (GO:1904869)	8/8	1.7612e-09	5.34052e-08	Inf	Inf	CCT3;CCT6A;CCT2;TCP1;CCT8;CCT7;CCT5;CCT4
Turquoise	Reactome_2016.157	Cell Cycle, Mitotic Homo sapiens R-HSA-69278	74/462	8.97532e-09	5.96258e-08	2.23054	41.3292	CETN2;PSMD8;PSMD9;PSMD6;PSMD7;TUBA1A;PSMD4;ENSA;BANF1;RAB8A;SKP1;RAB2A;NUDC;HSP90AA1;SEC13;RFC2;UBE2E1;DYNLL1;PSMA5;PSMA6;PSMA3;PSMA4;PSMA1;PSMA2;CNEP1R1;PSME1;PSME2;ANAPC4;UBA52;PSMD10;RAB1A;DYNC1I2;PSMD12;SET;ANAPC15;PCNA;ANAPC16;PSMD14;PSMD13;SSNA1;DCTN3;PSMA7;PSMB10;ANAPC11;PSMB6;PSMB7;PPP2CB;POLD4;PSMB4;PSMB5;PSMB2;RBBP4;UBB;PSMB3;PSMB1;NUP43;BUB3;RPS27A;CDKN2D;NCAPH2;PSMB8;ZWINT;PSMC5;PSMC6…
Turquoise	Reactome_2016.158	Dual incision in TC-NER Homo sapiens R-HSA-6782135	21/63	9.74793e-09	6.43487e-08	5.76162	106.28	PCNA;RFC2;GTF2H5;RBX1;POLD4;UBB;RPA3;POLR2D;PPIE;POLR2F;TCEA1;POLR2G;POLR2H;ZNF830;RPS27A;POLR2I;UBA52;POLR2J;POLR2K;HMGN1;POLR2L
Turquoise	Reactome_2016.159	RNA Polymerase II HIV Promoter Escape Homo sapiens R-HSA-167162	17/44	1.98657e-08	1.26341e-07	7.24311	128.451	GTF2A2;GTF2B;TAF10;TAF9;TAF11;GTF2F1;GTF2F2;GTF2E2;GTF2H5;POLR2D;POLR2F;POLR2G;POLR2H;POLR2I;POLR2J;POLR2K;POLR2L
Turquoise	Reactome_2016.160	RNA Polymerase II Promoter Escape Homo sapiens R-HSA-73776	17/44	1.98657e-08	1.26341e-07	7.24311	128.451	GTF2A2;GTF2B;TAF10;TAF9;TAF11;GTF2F1;GTF2F2;GTF2E2;GTF2H5;POLR2D;POLR2F;POLR2G;POLR2H;POLR2I;POLR2J;POLR2K;POLR2L
Turquoise	Reactome_2016.161	RNA Polymerase II Transcription Initiation And Promoter Clearance Homo sapiens R-HSA-76042	17/44	1.98657e-08	1.26341e-07	7.24311	128.451	GTF2A2;GTF2B;TAF10;TAF9;TAF11;GTF2F1;GTF2F2;GTF2E2;GTF2H5;POLR2D;POLR2F;POLR2G;POLR2H;POLR2I;POLR2J;POLR2K;POLR2L
Turquoise	Reactome_2016.162	RNA Polymerase II Transcription Initiation Homo sapiens R-HSA-75953	17/44	1.98657e-08	1.26341e-07	7.24311	128.451	GTF2A2;GTF2B;TAF10;TAF9;TAF11;GTF2F1;GTF2F2;GTF2E2;GTF2H5;POLR2D;POLR2F;POLR2G;POLR2H;POLR2I;POLR2J;POLR2K;POLR2L
Turquoise	Reactome_2016.163	RNA Polymerase II Transcription Pre-Initiation And Promoter Opening Homo sapiens R-HSA-73779	17/44	1.98657e-08	1.26341e-07	7.24311	128.451	GTF2A2;GTF2B;TAF10;TAF9;TAF11;GTF2F1;GTF2F2;GTF2E2;GTF2H5;POLR2D;POLR2F;POLR2G;POLR2H;POLR2I;POLR2J;POLR2K;POLR2L
Turquoise	Reactome_2016.164	HIV Transcription Initiation Homo sapiens R-HSA-167161	17/44	1.98657e-08	1.26341e-07	7.24311	128.451	GTF2A2;GTF2B;TAF10;TAF9;TAF11;GTF2F1;GTF2F2;GTF2E2;GTF2H5;POLR2D;POLR2F;POLR2G;POLR2H;POLR2I;POLR2J;POLR2K;POLR2L
Turquoise	Reactome_2016.165	Signalling to p38 via RIT and RIN Homo sapiens R-HSA-187706	46/239	2.47863e-08	1.56679e-07	2.76732	48.464	PSMD10;PSMD12;PSMD14;PSMD13;ARAF;PEBP1;PHB;ARRB2;PSMA7;PSMB10;PSMD8;PSMB6;PSMD9;PSMB7;PPP2CB;PSMD6;PSMB4;PSMD7;PSMB5;PSMD4;PSMB2;UBB;PSMB3;PSMB1;RPS27A;HRAS;PSMB8;RBX1;PSMA5;PSMA6;PSMA3;PSMC5;RIT1;PSMA4;PSMC6;PSMA1;PSMC3;PSMA2;PSMC4;PSMC1;PSMC2;PSME1;PSME2;LAMTOR2;UBA52;LAMTOR3
Turquoise	DisGeNET.18	Anemia, Macrocytic	18/41	6.34806e-10	1.90054e-07	9.01055	190.823	RPL5;ZRSR2;RPS7;RPL11;RPL35A;RPS26;RPS14;RPS17;RPS28;RPS27;RPS19;RPS29;RPL35;RPL27;RPL15;RPL26;RPL18;RPS24
Turquoise	GO_Biological_Process_2018.100	aerobic respiration (GO:0009060)	14/28	6.34303e-09	1.90418e-07	11.4903	216.89	SURF1;UQCRB;SDHC;UQCR10;COX6A1;SDHB;UQCRHL;SIRT3;NDUFS7;BLOC1S1;PMPCB;UQCRC2;SLC25A14;COX20
Turquoise	Reactome_2016.166	Signaling by FGFR2 IIIa TM Homo sapiens R-HSA-8851708	11/19	3.73898e-08	2.34925e-07	15.7747	269.777	NCBP2;POLR2D;POLR2F;POLR2G;POLR2H;GTF2F1;POLR2I;GTF2F2;POLR2J;POLR2K;POLR2L
Turquoise	Reactome_2016.167	GRB2 events in EGFR signaling Homo sapiens R-HSA-179812	45/235	4.10958e-08	2.5066e-07	2.74861	46.7466	PSMD10;PSMD12;PSMD14;PSMD13;ARAF;PEBP1;PHB;ARRB2;PSMA7;PSMB10;PSMD8;PSMB6;PSMD9;PSMB7;PPP2CB;PSMD6;PSMB4;PSMD7;PSMB5;PSMD4;PSMB2;UBB;PSMB3;PSMB1;RPS27A;HRAS;PSMB8;RBX1;PSMA5;PSMA6;PSMA3;PSMC5;PSMA4;PSMC6;PSMA1;PSMC3;PSMA2;PSMC4;PSMC1;PSMC2;PSME1;PSME2;LAMTOR2;UBA52;LAMTOR3
Turquoise	Reactome_2016.168	SHC1 events in EGFR signaling Homo sapiens R-HSA-180336	45/235	4.10958e-08	2.5066e-07	2.74861	46.7466	PSMD10;PSMD12;PSMD14;PSMD13;ARAF;PEBP1;PHB;ARRB2;PSMA7;PSMB10;PSMD8;PSMB6;PSMD9;PSMB7;PPP2CB;PSMD6;PSMB4;PSMD7;PSMB5;PSMD4;PSMB2;UBB;PSMB3;PSMB1;RPS27A;HRAS;PSMB8;RBX1;PSMA5;PSMA6;PSMA3;PSMC5;PSMA4;PSMC6;PSMA1;PSMC3;PSMA2;PSMC4;PSMC1;PSMC2;PSME1;PSME2;LAMTOR2;UBA52;LAMTOR3
Turquoise	Reactome_2016.169	SOS-mediated signalling Homo sapiens R-HSA-112412	45/235	4.10958e-08	2.5066e-07	2.74861	46.7466	PSMD10;PSMD12;PSMD14;PSMD13;ARAF;PEBP1;PHB;ARRB2;PSMA7;PSMB10;PSMD8;PSMB6;PSMD9;PSMB7;PPP2CB;PSMD6;PSMB4;PSMD7;PSMB5;PSMD4;PSMB2;UBB;PSMB3;PSMB1;RPS27A;HRAS;PSMB8;RBX1;PSMA5;PSMA6;PSMA3;PSMC5;PSMA4;PSMC6;PSMA1;PSMC3;PSMA2;PSMC4;PSMC1;PSMC2;PSME1;PSME2;LAMTOR2;UBA52;LAMTOR3
Turquoise	Reactome_2016.170	SHC1 events in ERBB4 signaling Homo sapiens R-HSA-1250347	45/235	4.10958e-08	2.5066e-07	2.74861	46.7466	PSMD10;PSMD12;PSMD14;PSMD13;ARAF;PEBP1;PHB;ARRB2;PSMA7;PSMB10;PSMD8;PSMB6;PSMD9;PSMB7;PPP2CB;PSMD6;PSMB4;PSMD7;PSMB5;PSMD4;PSMB2;UBB;PSMB3;PSMB1;RPS27A;HRAS;PSMB8;RBX1;PSMA5;PSMA6;PSMA3;PSMC5;PSMA4;PSMC6;PSMA1;PSMC3;PSMA2;PSMC4;PSMC1;PSMC2;PSME1;PSME2;LAMTOR2;UBA52;LAMTOR3
Turquoise	Reactome_2016.171	RAF/MAP kinase cascade Homo sapiens R-HSA-5673001	45/235	4.10958e-08	2.5066e-07	2.74861	46.7466	PSMD10;PSMD12;PSMD14;PSMD13;ARAF;PEBP1;PHB;ARRB2;PSMA7;PSMB10;PSMD8;PSMB6;PSMD9;PSMB7;PPP2CB;PSMD6;PSMB4;PSMD7;PSMB5;PSMD4;PSMB2;UBB;PSMB3;PSMB1;RPS27A;HRAS;PSMB8;RBX1;PSMA5;PSMA6;PSMA3;PSMC5;PSMA4;PSMC6;PSMA1;PSMC3;PSMA2;PSMC4;PSMC1;PSMC2;PSME1;PSME2;LAMTOR2;UBA52;LAMTOR3
Turquoise	Reactome_2016.172	Abortive elongation of HIV-1 transcript in the absence of Tat Homo sapiens R-HSA-167242	12/23	4.24333e-08	2.57314e-07	12.5213	212.553	NCBP2;POLR2D;SUPT4H1;POLR2F;POLR2G;POLR2H;GTF2F1;POLR2I;GTF2F2;POLR2J;POLR2K;POLR2L
Turquoise	Reactome_2016.173	FRS-mediated FGFR2 signaling Homo sapiens R-HSA-5654700	45/236	4.68821e-08	2.7783e-07	2.73407	46.1391	PSMD10;PSMD12;PSMD14;PSMD13;ARAF;PEBP1;PHB;ARRB2;PSMA7;PSMB10;PSMD8;PSMB6;PSMD9;PSMB7;PPP2CB;PSMD6;PSMB4;PSMD7;PSMB5;PSMD4;PSMB2;UBB;PSMB3;PSMB1;RPS27A;HRAS;PSMB8;RBX1;PSMA5;PSMA6;PSMA3;PSMC5;PSMA4;PSMC6;PSMA1;PSMC3;PSMA2;PSMC4;PSMC1;PSMC2;PSME1;PSME2;LAMTOR2;UBA52;LAMTOR3
Turquoise	Reactome_2016.174	FRS-mediated FGFR4 signaling Homo sapiens R-HSA-5654712	45/236	4.68821e-08	2.7783e-07	2.73407	46.1391	PSMD10;PSMD12;PSMD14;PSMD13;ARAF;PEBP1;PHB;ARRB2;PSMA7;PSMB10;PSMD8;PSMB6;PSMD9;PSMB7;PPP2CB;PSMD6;PSMB4;PSMD7;PSMB5;PSMD4;PSMB2;UBB;PSMB3;PSMB1;RPS27A;HRAS;PSMB8;RBX1;PSMA5;PSMA6;PSMA3;PSMC5;PSMA4;PSMC6;PSMA1;PSMC3;PSMA2;PSMC4;PSMC1;PSMC2;PSME1;PSME2;LAMTOR2;UBA52;LAMTOR3
Turquoise	Reactome_2016.175	FRS-mediated FGFR3 signaling Homo sapiens R-HSA-5654706	45/236	4.68821e-08	2.7783e-07	2.73407	46.1391	PSMD10;PSMD12;PSMD14;PSMD13;ARAF;PEBP1;PHB;ARRB2;PSMA7;PSMB10;PSMD8;PSMB6;PSMD9;PSMB7;PPP2CB;PSMD6;PSMB4;PSMD7;PSMB5;PSMD4;PSMB2;UBB;PSMB3;PSMB1;RPS27A;HRAS;PSMB8;RBX1;PSMA5;PSMA6;PSMA3;PSMC5;PSMA4;PSMC6;PSMA1;PSMC3;PSMA2;PSMC4;PSMC1;PSMC2;PSME1;PSME2;LAMTOR2;UBA52;LAMTOR3
Turquoise	Reactome_2016.176	FRS-mediated FGFR1 signaling Homo sapiens R-HSA-5654693	45/236	4.68821e-08	2.7783e-07	2.73407	46.1391	PSMD10;PSMD12;PSMD14;PSMD13;ARAF;PEBP1;PHB;ARRB2;PSMA7;PSMB10;PSMD8;PSMB6;PSMD9;PSMB7;PPP2CB;PSMD6;PSMB4;PSMD7;PSMB5;PSMD4;PSMB2;UBB;PSMB3;PSMB1;RPS27A;HRAS;PSMB8;RBX1;PSMA5;PSMA6;PSMA3;PSMC5;PSMA4;PSMC6;PSMA1;PSMC3;PSMA2;PSMC4;PSMC1;PSMC2;PSME1;PSME2;LAMTOR2;UBA52;LAMTOR3
Turquoise	Reactome_2016.177	TCF dependent signaling in response to WNT Homo sapiens R-HSA-201681	40/199	5.83687e-08	3.43946e-07	2.91523	48.5575	PSMD10;PSMD12;PSMD14;PSMD13;CBY1;PSMA7;PSMB10;PSMD8;PSMB6;PSMD9;PSMB7;PPP2CB;PSMD6;PSMB4;PSMD7;PSMB5;PSMD4;PSMB2;UBB;PSMB3;PSMB1;RUVBL1;RPS27A;PSMB8;RBX1;PSMA5;PSMA6;PSMA3;PSMC5;PSMA4;PSMC6;PSMA1;PSMC3;PSMA2;PSMC4;PSMC1;PSMC2;PSME1;PSME2;UBA52
Turquoise	Reactome_2016.178	Folding of actin by CCT/TriC Homo sapiens R-HSA-390450	8/10	6.83552e-08	4.00531e-07	45.8193	755.952	CCT3;CCT6A;CCT2;TCP1;CCT8;CCT7;CCT5;CCT4
Turquoise	Reactome_2016.179	Endosomal Sorting Complex Required For Transport (ESCRT) Homo sapiens R-HSA-917729	13/28	6.88674e-08	4.00945e-07	9.9515	164.111	TSG101;VPS37D;SNF8;UBB;CHMP2A;CHMP4B;RPS27A;CHMP6;VPS25;UBA52;CHMP7;VPS28;CHMP5
Turquoise	Reactome_2016.180	ARMS-mediated activation Homo sapiens R-HSA-170984	45/239	6.91948e-08	4.00945e-07	2.69134	44.3704	PSMD10;PSMD12;PSMD14;PSMD13;ARAF;PEBP1;PHB;ARRB2;PSMA7;PSMB10;PSMD8;PSMB6;PSMD9;PSMB7;PPP2CB;PSMD6;PSMB4;PSMD7;PSMB5;PSMD4;PSMB2;UBB;PSMB3;PSMB1;RPS27A;HRAS;PSMB8;RBX1;PSMA5;PSMA6;PSMA3;PSMC5;PSMA4;PSMC6;PSMA1;PSMC3;PSMA2;PSMC4;PSMC1;PSMC2;PSME1;PSME2;LAMTOR2;UBA52;LAMTOR3
Turquoise	GO_Biological_Process_2018.101	Fc-epsilon receptor signaling pathway (GO:0038095)	39/182	1.36523e-08	4.05785e-07	3.16114	57.2462	PSMD10;PSMD12;PSMD14;PSMD13;UBE2D2;PSMB10;PSMA7;PSMD8;PSMB6;PSMD9;PSMB7;PSMD6;PSMB4;PSMD7;PSMB5;PSMD4;UBB;PSMB2;PSMB3;PSMB1;RPS27A;HRAS;SKP1;PSMB8;PSMA5;PSMA6;PSMA3;PSMC5;PSMA4;PSMC6;PSMA1;PSMC3;PSMA2;PSMC4;PSMC1;PSMC2;PSME1;PSME2;UBA52
Turquoise	Reactome_2016.181	RNA Polymerase II Pre-transcription Events Homo sapiens R-HSA-674695	20/64	7.47853e-08	4.30945e-07	5.23398	85.8825	GTF2A2;NCBP2;GTF2B;TAF10;TAF9;TAF11;SUPT4H1;GTF2F1;GTF2F2;GTF2E2;GTF2H5;POLR2D;POLR2F;TCEA1;POLR2G;POLR2H;POLR2I;POLR2J;POLR2K;POLR2L
Turquoise	GO_Biological_Process_2018.102	ATP synthesis coupled electron transport (GO:0042773)	8/9	1.47202e-08	4.33236e-07	91.6436	1652.71	NDUFB6;NDUFA12;NDUFS2;MT-CO2;NDUFV3;NDUFV1;COQ7;COA6
Turquoise	Reactome_2016.182	Frs2-mediated activation Homo sapiens R-HSA-170968	45/240	7.86298e-08	4.50609e-07	2.67739	43.7982	PSMD10;PSMD12;PSMD14;PSMD13;ARAF;PEBP1;PHB;ARRB2;PSMA7;PSMB10;PSMD8;PSMB6;PSMD9;PSMB7;PPP2CB;PSMD6;PSMB4;PSMD7;PSMB5;PSMD4;PSMB2;UBB;PSMB3;PSMB1;RPS27A;HRAS;PSMB8;RBX1;PSMA5;PSMA6;PSMA3;PSMC5;PSMA4;PSMC6;PSMA1;PSMC3;PSMA2;PSMC4;PSMC1;PSMC2;PSME1;PSME2;LAMTOR2;UBA52;LAMTOR3
Turquoise	DisGeNET.19	Abnormality of the urinary system	16/34	1.61834e-09	4.59013e-07	10.2242	206.956	RPL5;RPS7;RPL11;RPL35A;RPS26;RPS17;RPS28;RPS27;RPS19;RPS29;RPL35;RPL27;RPL15;RPL26;RPL18;RPS24
Turquoise	GO_Biological_Process_2018.103	Fc receptor signaling pathway (GO:0038093)	39/183	1.60205e-08	4.66927e-07	3.13902	56.3435	PSMD10;PSMD12;PSMD14;PSMD13;UBE2D2;PSMB10;PSMA7;PSMD8;PSMB6;PSMD9;PSMB7;PSMD6;PSMB4;PSMD7;PSMB5;PSMD4;UBB;PSMB2;PSMB3;PSMB1;RPS27A;HRAS;SKP1;PSMB8;PSMA5;PSMA6;PSMA3;PSMC5;PSMA4;PSMC6;PSMA1;PSMC3;PSMA2;PSMC4;PSMC1;PSMC2;PSME1;PSME2;UBA52
Turquoise	GO_Biological_Process_2018.104	regulation of canonical Wnt signaling pathway (GO:0060828)	43/213	1.64678e-08	4.75351e-07	2.93492	52.5993	PSMD10;PSMD12;PSMD14;PSMD13;PSMA7;PSMB10;PSMD8;PSMB6;PSMD9;PSMB7;PSMD6;PSMB4;PSMD7;PSMB5;PSMD4;PSMB2;UBB;PSMB3;PSMB1;RUVBL1;RPS27A;PSMB8;PPP1CA;RBX1;PSMA5;PSMA6;PSMA3;PSMC5;PSMA4;PSMC6;PSMA1;SDHAF2;PSMC3;PSMA2;PSMC4;DDIT3;PSMC1;PSMC2;PSME1;PSME2;PIN1;UBA52;PFDN5
Turquoise	GO_Biological_Process_2018.105	regulation of telomerase RNA localization to Cajal body (GO:1904872)	11/18	1.69862e-08	4.85642e-07	18.0292	322.559	CCT3;CCT6A;CCT2;TCP1;RUVBL1;NHP2;CCT8;CCT7;NOP10;CCT5;CCT4
Turquoise	Reactome_2016.183	MAPK1/MAPK3 signaling Homo sapiens R-HSA-5684996	45/241	8.92661e-08	5.08768e-07	2.66359	43.2344	PSMD10;PSMD12;PSMD14;PSMD13;ARAF;PEBP1;PHB;ARRB2;PSMA7;PSMB10;PSMD8;PSMB6;PSMD9;PSMB7;PPP2CB;PSMD6;PSMB4;PSMD7;PSMB5;PSMD4;PSMB2;UBB;PSMB3;PSMB1;RPS27A;HRAS;PSMB8;RBX1;PSMA5;PSMA6;PSMA3;PSMC5;PSMA4;PSMC6;PSMA1;PSMC3;PSMA2;PSMC4;PSMC1;PSMC2;PSME1;PSME2;LAMTOR2;UBA52;LAMTOR3
Turquoise	Reactome_2016.184	Prolonged ERK activation events Homo sapiens R-HSA-169893	45/242	1.01246e-07	5.73908e-07	2.64992	42.6789	PSMD10;PSMD12;PSMD14;PSMD13;ARAF;PEBP1;PHB;ARRB2;PSMA7;PSMB10;PSMD8;PSMB6;PSMD9;PSMB7;PPP2CB;PSMD6;PSMB4;PSMD7;PSMB5;PSMD4;PSMB2;UBB;PSMB3;PSMB1;RPS27A;HRAS;PSMB8;RBX1;PSMA5;PSMA6;PSMA3;PSMC5;PSMA4;PSMC6;PSMA1;PSMC3;PSMA2;PSMC4;PSMC1;PSMC2;PSME1;PSME2;LAMTOR2;UBA52;LAMTOR3
Turquoise	DisGeNET.20	Impaired exercise tolerance	24/75	2.21866e-09	5.97818e-07	5.43027	108.206	NDUFB9;TIMMDC1;NDUFA11;PET100;NDUFB3;NDUFA1;SDHD;COX6B1;RNASEH1;NDUFS6;NDUFS4;SDHAF1;NDUFAF5;NDUFS3;NDUFAF2;NDUFS2;NDUFAF3;COX14;TMEM126B;NDUFV2;SLC25A4;NDUFV1;ISCU;COX20
Turquoise	DisGeNET.21	Leigh Disease	28/99	2.48044e-09	6.36529e-07	4.55723	90.3008	ECHS1;NDUFA12;PDHB;LIAS;COX5A;EMC3;NDUFV2;NDUFV1;COX8A;NDUFA9;TSFM;ATP5PF;SURF1;PET100;NDUFA2;NDUFA1;SDHB;ATP5F1E;NDUFS8;NDUFS7;SCO2;NDUFAF5;NDUFS4;SDHAF1;NDUFAF2;NDUFS3;NDUFAF3;NDUFS2
Turquoise	Reactome_2016.185	Signaling by Leptin Homo sapiens R-HSA-2586552	45/243	1.14725e-07	6.46802e-07	2.63639	42.1315	PSMD10;PSMD12;PSMD14;PSMD13;ARAF;PEBP1;PHB;ARRB2;PSMA7;PSMB10;PSMD8;PSMB6;PSMD9;PSMB7;PPP2CB;PSMD6;PSMB4;PSMD7;PSMB5;PSMD4;PSMB2;UBB;PSMB3;PSMB1;RPS27A;HRAS;PSMB8;RBX1;PSMA5;PSMA6;PSMA3;PSMC5;PSMA4;PSMC6;PSMA1;PSMC3;PSMA2;PSMC4;PSMC1;PSMC2;PSME1;PSME2;LAMTOR2;UBA52;LAMTOR3
Turquoise	GO_Biological_Process_2018.106	establishment of protein localization to mitochondrial membrane (GO:0090151)	9/12	2.48479e-08	7.03713e-07	34.384	602.081	HSP90AA1;NDUFA13;SAMM50;TIMM9;TIMM13;TOMM7;TIMM22;TIMM10;TOMM22
Turquoise	KEGG_2019_Human.11	RNA transport	36/165	2.98537e-08	7.21917e-07	3.23098	55.9831	EIF4A2;POP5;EIF4A1;RBM8A;GEMIN2;RPP30;PHAX;SUMO1;SUMO3;MAGOH;SUMO2;SAP18;NUP43;RPP38;PAIP1;EIF2B3;SEC13;NCBP2;PYM1;UPF3B;EIF2S2;MAGOHB;RPP25L;THOC7;EIF1;EEF1A1;CLNS1A;EIF3I;RPP21;EIF3G;STRAP;EIF3H;EIF3E;GEMIN7;EIF1B;RAN
Turquoise	Reactome_2016.186	Budding and maturation of HIV virion Homo sapiens R-HSA-162588	12/25	1.40083e-07	7.82784e-07	10.5938	167.181	TSG101;UBB;CHMP2A;VPS37D;CHMP4B;RPS27A;CHMP6;PPIA;UBA52;CHMP7;VPS28;CHMP5
Turquoise	Reactome_2016.187	Signaling by FGFR2 Homo sapiens R-HSA-5654738	59/361	1.40346e-07	7.82784e-07	2.27359	35.8754	ARAF;PEBP1;ARRB2;PSMD8;PSMD9;PSMD6;PSMD7;PSMD4;HRAS;NCBP2;GTF2F1;GTF2F2;RBX1;PSMA5;PSMA6;PSMA3;PSMA4;PSMA1;PSMA2;AKT1S1;PSME1;PSME2;UBA52;PSMD10;PSMD12;PSMD14;PSMD13;PHB;PSMA7;PSMB10;PSMB6;PSMB7;PPP2CB;PSMB4;PSMB5;PSMB2;UBB;PSMB3;PSMB1;POLR2D;POLR2F;POLR2G;POLR2H;RPS27A;POLR2I;HNRNPA1;POLR2J;POLR2K;POLR2L;BAD;PSMB8;PSMC5;PSMC6;PSMC3;PSMC4;PSMC1;PSMC2;LAMTOR2;LAMTOR3
Turquoise	GO_Biological_Process_2018.107	cellular response to tumor necrosis factor (GO:0071356)	40/194	2.79518e-08	7.84217e-07	3.01071	52.3646	PSMD10;PSMD12;PSMD14;PSMD13;CIB1;PSMA7;PSMB10;TXNDC17;PSMD8;PSMB6;PSMD9;PSMB7;PSMD6;PSMB4;PSMD7;PSMB5;PSMD4;PSMB2;UBB;PSMB3;TMSB4X;PSMB1;RPS3;RPS27A;PSMB8;PSMA5;PSMA6;PSMA3;PSMC5;PSMA4;PSMC6;PSMA1;PSMC3;PSMA2;PSMC4;PSMC1;PSMC2;PSME1;PSME2;UBA52
Turquoise	Reactome_2016.188	Signalling to ERKs Homo sapiens R-HSA-187687	46/253	1.46232e-07	8.10665e-07	2.57817	40.5755	PSMD10;PSMD12;PSMD14;PSMD13;ARAF;PEBP1;PHB;ARRB2;PSMA7;PSMB10;PSMD8;PSMB6;PSMD9;PSMB7;PPP2CB;PSMD6;PSMB4;PSMD7;PSMB5;PSMD4;PSMB2;UBB;PSMB3;PSMB1;RPS27A;HRAS;PSMB8;RBX1;PSMA5;PSMA6;PSMA3;PSMC5;RIT1;PSMA4;PSMC6;PSMA1;PSMC3;PSMA2;PSMC4;PSMC1;PSMC2;PSME1;PSME2;LAMTOR2;UBA52;LAMTOR3
Turquoise	Reactome_2016.189	Interleukin receptor SHC signaling Homo sapiens R-HSA-912526	45/245	1.46899e-07	8.10665e-07	2.60974	41.0604	PSMD10;PSMD12;PSMD14;PSMD13;ARAF;PEBP1;PHB;ARRB2;PSMA7;PSMB10;PSMD8;PSMB6;PSMD9;PSMB7;PPP2CB;PSMD6;PSMB4;PSMD7;PSMB5;PSMD4;PSMB2;UBB;PSMB3;PSMB1;RPS27A;HRAS;PSMB8;RBX1;PSMA5;PSMA6;PSMA3;PSMC5;PSMA4;PSMC6;PSMA1;PSMC3;PSMA2;PSMC4;PSMC1;PSMC2;PSME1;PSME2;LAMTOR2;UBA52;LAMTOR3
Turquoise	Reactome_2016.190	Signaling by Wnt Homo sapiens R-HSA-195721	51/295	1.65354e-07	9.06473e-07	2.42777	37.9101	CLTB;CBY1;CLTA;ARRB2;PSMD8;PSMD9;PSMD6;PSMD7;PSMD4;RUVBL1;RAC3;TMED5;SKP1;RBX1;PSMA5;PSMA6;PSMA3;PSMA4;PSMA1;PSMA2;PSME1;PSME2;PFN1;UBA52;PSMD10;PSMD12;PSMD14;PSMD13;PSMA7;PSMB10;PSMB6;PSMB7;PPP2CB;GNG10;PSMB4;PSMB5;PARD6A;PSMB2;UBB;PSMB3;PSMB1;AP2S1;RPS27A;PSMB8;GNG13;PSMC5;PSMC6;PSMC3;PSMC4;PSMC1;PSMC2
Turquoise	Reactome_2016.191	Signalling to RAS Homo sapiens R-HSA-167044	45/246	1.65998e-07	9.06473e-07	2.59662	40.5365	PSMD10;PSMD12;PSMD14;PSMD13;ARAF;PEBP1;PHB;ARRB2;PSMA7;PSMB10;PSMD8;PSMB6;PSMD9;PSMB7;PPP2CB;PSMD6;PSMB4;PSMD7;PSMB5;PSMD4;PSMB2;UBB;PSMB3;PSMB1;RPS27A;HRAS;PSMB8;RBX1;PSMA5;PSMA6;PSMA3;PSMC5;PSMA4;PSMC6;PSMA1;PSMC3;PSMA2;PSMC4;PSMC1;PSMC2;PSME1;PSME2;LAMTOR2;UBA52;LAMTOR3
Turquoise	KEGG_2019_Human.12	Protein export	12/23	4.24333e-08	9.40605e-07	12.5213	212.553	SRP19;IMMP1L;SPCS3;SPCS2;SPCS1;SEC61G;SEC61B;SRP14;SEC62;SEC11A;SRP9;SEC11C
Turquoise	Reactome_2016.192	Transcription of the HIV genome Homo sapiens R-HSA-167172	20/67	1.74673e-07	9.48875e-07	4.89909	76.2316	GTF2A2;NCBP2;GTF2B;TAF10;TAF9;TAF11;SUPT4H1;GTF2F1;GTF2F2;GTF2E2;GTF2H5;POLR2D;POLR2F;TCEA1;POLR2G;POLR2H;POLR2I;POLR2J;POLR2K;POLR2L
Turquoise	Reactome_2016.193	VEGFR2 mediated cell proliferation Homo sapiens R-HSA-5218921	45/248	2.11398e-07	1.14243e-06	2.57075	39.5112	PSMD10;PSMD12;PSMD14;PSMD13;ARAF;PEBP1;PHB;ARRB2;PSMA7;PSMB10;PSMD8;PSMB6;PSMD9;PSMB7;PPP2CB;PSMD6;PSMB4;PSMD7;PSMB5;PSMD4;PSMB2;UBB;PSMB3;PSMB1;RPS27A;HRAS;PSMB8;RBX1;PSMA5;PSMA6;PSMA3;PSMC5;PSMA4;PSMC6;PSMA1;PSMC3;PSMA2;PSMC4;PSMC1;PSMC2;PSME1;PSME2;LAMTOR2;UBA52;LAMTOR3
Turquoise	GO_Biological_Process_2018.108	nucleocytoplasmic transport (GO:0006913)	17/46	4.3337e-08	1.20461e-06	6.74285	114.32	NPM1;SET;ANP32A;NCBP2;GEMIN2;RITA1;PHAX;NUTF2;SNRPD2;SNRPD1;SNRPG;SNRPE;SNRPD3;GEMIN7;SNRPF;HNRNPA1;NSRP1
Turquoise	Reactome_2016.194	Signaling by FGFR Homo sapiens R-HSA-190236	59/366	2.27792e-07	1.22468e-06	2.23594	34.1984	ARAF;PEBP1;ARRB2;PSMD8;PSMD9;PSMD6;PSMD7;PSMD4;HRAS;NCBP2;GTF2F1;GTF2F2;RBX1;PSMA5;PSMA6;PSMA3;PSMA4;PSMA1;PSMA2;AKT1S1;PSME1;PSME2;UBA52;PSMD10;PSMD12;PSMD14;PSMD13;PHB;PSMA7;PSMB10;PSMB6;PSMB7;PPP2CB;PSMB4;PSMB5;PSMB2;UBB;PSMB3;PSMB1;POLR2D;POLR2F;POLR2G;POLR2H;RPS27A;POLR2I;HNRNPA1;POLR2J;POLR2K;POLR2L;BAD;PSMB8;PSMC5;PSMC6;PSMC3;PSMC4;PSMC1;PSMC2;LAMTOR2;LAMTOR3
Turquoise	Reactome_2016.195	FGFR2 alternative splicing Homo sapiens R-HSA-6803529	12/26	2.41036e-07	1.28923e-06	9.83653	149.892	NCBP2;POLR2D;POLR2F;POLR2G;POLR2H;POLR2I;HNRNPA1;GTF2F1;POLR2J;GTF2F2;POLR2K;POLR2L
Turquoise	Reactome_2016.196	Cell Cycle Homo sapiens R-HSA-1640170	81/566	2.79409e-07	1.48685e-06	1.95158	29.4505	CETN2;PSMD8;BABAM1;PSMD9;PSMD6;PSMD7;TUBA1A;PSMD4;SUMO1;YWHAQ;ENSA;RUVBL1;BANF1;RAB8A;SKP1;RAB2A;NUDC;HSP90AA1;SEC13;RFC2;UBE2E1;DYNLL1;PSMA5;PSMA6;PSMA3;PSMA4;PSMA1;PSMA2;CNEP1R1;PSME1;NHP2;PSME2;ANAPC4;UBA52;PSMD10;RAB1A;DYNC1I2;PSMD12;SET;ANAPC15;PCNA;ANAPC16;PSMD14;PSMD13;SSNA1;DCTN3;PSMA7;PSMB10;ANAPC11;PSMB6;PSMB7;PPP2CB;POLD4;PSMB4;PSMB5;PSMB2;RBBP4;UBB;PSMB3;PCBP4;PSMB1;NUP43;BUB3;RPS27A;…
Turquoise	Reactome_2016.197	Interleukin-2 signaling Homo sapiens R-HSA-451927	45/252	3.39239e-07	1.79607e-06	2.52052	37.5471	PSMD10;PSMD12;PSMD14;PSMD13;ARAF;PEBP1;PHB;ARRB2;PSMA7;PSMB10;PSMD8;PSMB6;PSMD9;PSMB7;PPP2CB;PSMD6;PSMB4;PSMD7;PSMB5;PSMD4;PSMB2;UBB;PSMB3;PSMB1;RPS27A;HRAS;PSMB8;RBX1;PSMA5;PSMA6;PSMA3;PSMC5;PSMA4;PSMC6;PSMA1;PSMC3;PSMA2;PSMC4;PSMC1;PSMC2;PSME1;PSME2;LAMTOR2;UBA52;LAMTOR3
Turquoise	DisGeNET.22	Disease Exacerbation	34/144	8.83435e-09	2.16401e-06	3.57774	66.3479	FKBP2;UBXN1;MRPS11;GSTP1;URM1;HIKESHI;PHB;MRPL13;RPS15;PRDX3;PTPA;PRDX4;RPS19;IDH3B;RPL13;RPL15;RPL18;CCT7;NDUFV1;HRAS;SNX5;ABT1;NOP56;RPS6;NDUFA2;M6PR;CNPY2;RPS26;APEX1;SERBP1;SUCLG1;NAXD;RPS21;PLPP1
Turquoise	GO_Biological_Process_2018.109	protein deubiquitination (GO:0016579)	47/257	8.95845e-08	2.46727e-06	2.59782	42.1576	PSMD10;PSMD12;PSMD14;PSMD13;AKR1B1;NEDD8;ARRB2;PSMA7;PSMB10;PSMD8;BABAM1;PSMB6;PSMD9;PSMB7;TFPT;PSMD6;PSMB4;PSMD7;PSMB5;PSMD4;PSMB2;UBB;PSMB3;PSMB1;RUVBL1;SUDS3;RPS27A;ZRANB1;TAF10;UCHL3;PSMB8;PSMA5;PSMA6;PSMA3;PSMC5;PSMA4;PSMC6;COPS5;PSMA1;PSMC3;PSMA2;PSMC4;PSMC1;PSMC2;PSME1;PSME2;UBA52
Turquoise	WikiPathways_2019_Human.7	Ciliary landscape WP4352	42/216	7.3609e-08	3.3755e-06	2.79837	45.9618	DYNC1I2;PSMD12;HDAC2;ECHS1;PSMD13;SSNA1;UBE2D2;HTRA2;PSMD8;EXOSC7;PSMD7;DNPEP;EXOSC9;TCTEX1D2;SNRPB2;EXOSC2;RAB8A;RAB2A;IQCB1;NDUFA9;NUDC;NDUFA5;DYNLL1;COX6C;LSM4;AIMP1;COPS4;IFT20;COPS3;MYL6;COPS6;IFT22;PSMC6;COPS5;PSMC4;TIPRL;IFT27;DYNLRB1;YPEL5;COPS8;CALM2;CLUAP1
Turquoise	DisGeNET.23	Anemia, Diamond-Blackfan	22/70	1.49582e-08	3.50477e-06	5.28308	95.1905	RPL5;RPS7;RPL31;RPL11;AHSA1;RPL35A;RPSA;RPS26;RPS14;RPS17;RPS28;RPS27;RPS19;RPS29;SBDS;RPL35;RPL27;RPL26;RPL15;RPL18;RPS21;RPS24
Turquoise	Reactome_2016.198	Formation of the Early Elongation Complex Homo sapiens R-HSA-113418	13/33	7.18458e-07	3.74676e-06	7.46159	105.553	NCBP2;SUPT4H1;GTF2F1;GTF2F2;GTF2H5;POLR2D;POLR2F;POLR2G;POLR2H;POLR2I;POLR2J;POLR2K;POLR2L
Turquoise	Reactome_2016.199	Formation of the HIV-1 Early Elongation Complex Homo sapiens R-HSA-167158	13/33	7.18458e-07	3.74676e-06	7.46159	105.553	NCBP2;SUPT4H1;GTF2F1;GTF2F2;GTF2H5;POLR2D;POLR2F;POLR2G;POLR2H;POLR2I;POLR2J;POLR2K;POLR2L
Turquoise	Reactome_2016.200	Detoxification of Reactive Oxygen Species Homo sapiens R-HSA-3299685	13/33	7.18458e-07	3.74676e-06	7.46159	105.553	GPX1;GSTP1;NUDT2;CYBA;TXN;TXN2;SOD1;PRDX3;PRDX2;PRDX5;PRDX1;CYCS;P4HB
Turquoise	Reactome_2016.201	Macroautophagy Homo sapiens R-HSA-1632852	19/67	8.51768e-07	4.41987e-06	4.55407	63.6475	GABARAPL2;ATG9B;PRKAG1;WDR45;DYNLL1;GABARAP;RRAGA;RRAGB;ATG101;RHEB;CHMP2A;CHMP4B;LAMTOR2;LAMTOR1;CHMP6;LAMTOR4;CHMP7;LAMTOR3;LAMTOR5
Turquoise	Reactome_2016.202	Interleukin-3, 5 and GM-CSF signaling Homo sapiens R-HSA-512988	45/261	9.35937e-07	4.83259e-06	2.4143	33.5147	PSMD10;PSMD12;PSMD14;PSMD13;ARAF;PEBP1;PHB;ARRB2;PSMA7;PSMB10;PSMD8;PSMB6;PSMD9;PSMB7;PPP2CB;PSMD6;PSMB4;PSMD7;PSMB5;PSMD4;PSMB2;UBB;PSMB3;PSMB1;RPS27A;HRAS;PSMB8;RBX1;PSMA5;PSMA6;PSMA3;PSMC5;PSMA4;PSMC6;PSMA1;PSMC3;PSMA2;PSMC4;PSMC1;PSMC2;PSME1;PSME2;LAMTOR2;UBA52;LAMTOR3
Turquoise	Reactome_2016.203	mRNA Capping Homo sapiens R-HSA-72086	12/29	1.03038e-06	5.294e-06	8.09935	111.654	NCBP2;POLR2D;POLR2F;POLR2G;POLR2H;POLR2I;GTF2F1;POLR2J;GTF2F2;POLR2K;GTF2H5;POLR2L
Turquoise	GO_Biological_Process_2018.110	mitochondrial gene expression (GO:0140053)	16/45	2.02008e-07	5.51299e-06	6.34224	97.7653	MRPS15;NDUFA7;MRPS16;MRPS24;MRPS11;MRPL16;MRPS21;MRPL12;MRPS7;MRPL23;MRPL57;MRPS18C;MRPL2;MRPL51;TFAM;SLC25A33
Turquoise	GO_Biological_Process_2018.111	maturation of SSU-rRNA from tricistronic rRNA transcript (SSU-rRNA, 5.8S rRNA, LSU-rRNA) (GO:0000462)	14/35	2.13782e-07	5.78174e-06	7.65729	117.603	ABT1;RPS8;UTP3;MRPS11;NGDN;FCF1;RPSA;RPS14;EMG1;MRPS9;RPS16;RPS19;RPS21;RPS24
Turquoise	GO_Biological_Process_2018.112	post-translational protein modification (GO:0043687)	58/357	2.19825e-07	5.89209e-06	2.2564	34.5917	FBXO22;DDA1;PSMD8;PSMD9;PSMD6;PSMD7;PSMD4;FBXO6;ELOB;ELOC;RAB8A;SKP1;RAB2A;COMMD1;UCHL3;RABGGTB;PDIA6;SUMF1;RBX1;PSMA5;PSMA6;PSMA3;PSMA4;PSMA1;PSMA2;PSME1;PSME2;PSMD10;RAB1A;PSMD12;PSMD14;PSMD13;GPS1;NEDD8;RNF7;PSMA7;PSMB10;CST3;PSMB6;PSMB7;PSMB4;PSMB5;PSMB2;PSMB3;PSMB1;PSMB8;COPS4;COPS3;PSMC5;COPS6;PSMC6;COPS5;PSMC3;PSMC4;PSMC1;PSMC2;P4HB;COPS8
Turquoise	Reactome_2016.204	Global Genome Nucleotide Excision Repair (GG-NER) Homo sapiens R-HSA-5696399	21/82	1.45734e-06	7.45103e-06	3.96291	53.2571	PCNA;RFC2;CETN2;GPS1;GTF2H5;RBX1;COPS4;TFPT;POLD4;COPS3;COPS6;COPS5;SUMO1;UBB;SUMO3;RPA3;RUVBL1;SUMO2;RPS27A;COPS8;UBA52
Turquoise	Reactome_2016.205	NCAM signaling for neurite out-growth Homo sapiens R-HSA-375165	45/266	1.59934e-06	8.13711e-06	2.35903	31.4834	PSMD10;PSMD12;PSMD14;PSMD13;ARAF;PEBP1;PHB;ARRB2;PSMA7;PSMB10;PSMD8;PSMB6;PSMD9;PSMB7;PPP2CB;PSMD6;PSMB4;PSMD7;PSMB5;PSMD4;PSMB2;UBB;PSMB3;PSMB1;RPS27A;HRAS;PSMB8;RBX1;PSMA5;PSMA6;PSMA3;PSMC5;PSMA4;PSMC6;PSMA1;PSMC3;PSMA2;PSMC4;PSMC1;PSMC2;PSME1;PSME2;LAMTOR2;UBA52;LAMTOR3
Turquoise	Reactome_2016.206	Signaling by the B Cell Receptor (BCR) Homo sapiens R-HSA-983705	41/233	1.64388e-06	8.32312e-06	2.47162	32.9182	PSMD10;PSMD12;PSMD14;PSMD13;PSMA7;PSMB10;PSMD8;PSMB6;PSMD9;PSMB7;PPP2CB;PSMD6;PSMB4;PSMD7;PSMB5;PSMD4;PSMB2;UBB;PSMB3;PSMB1;RPS27A;HRAS;SKP1;BAD;PSMB8;PSMA5;PSMA6;PSMA3;PSMC5;PSMA4;PSMC6;PSMA1;PSMC3;PSMA2;PSMC4;PSMC1;PSMC2;AKT1S1;PSME1;PSME2;UBA52
Turquoise	GO_Biological_Process_2018.113	DNA-templated transcription, elongation (GO:0006354)	26/108	3.20569e-07	8.51634e-06	3.65723	54.6872	GTF2A2;ELOF1;GTF2B;TAF9;SUPT4H1;WDR61;GTF2E2;POLR2D;POLR2F;ELOB;POLR2G;ELOC;POLR2H;POLR2I;POLR2J;POLR2K;POLR2L;NCBP2;TAF10;TAF11;GTF2F1;GTF2F2;GTF2H5;POLR1C;TCEA2;TCEA1
Turquoise	GO_Biological_Process_2018.114	transcription elongation from RNA polymerase II promoter (GO:0006368)	24/95	3.47972e-07	9.16327e-06	3.89636	57.9434	GTF2A2;ELOF1;NCBP2;GTF2B;TAF10;TAF9;TAF11;SUPT4H1;WDR61;GTF2F1;GTF2F2;GTF2E2;GTF2H5;POLR2D;POLR2F;TCEA1;ELOB;POLR2G;ELOC;POLR2H;POLR2I;POLR2J;POLR2K;POLR2L
Turquoise	GO_Biological_Process_2018.115	protein stabilization (GO:0050821)	32/152	4.05896e-07	1.05956e-05	3.08109	45.3449	RPL5;SWSAP1;RPL11;TAF9;PARK7;PHB;HSPD1;SUMO1;PDCD10;ZSWIM7;CCT8;CCT7;CCT5;CCT4;CCT3;CCT2;HSP90AA1;RPS7;UBE2B;RPL23;PTGES3;MT3;GTPBP4;CCT6A;PINK1;PRKRA;CDC37;TCP1;PIN1;PPIB;PFN1;NOP53
Turquoise	DisGeNET.24	Pallor	19/57	4.90718e-08	1.10187e-05	5.75565	96.8674	RPL5;FH;RPS7;RPL11;AIP;RPL35A;RPS26;RPS17;RPS28;RPS27;RPS19;RPS29;RPL35;RPL27;RPL26;RPL15;RPL18;MMADHC;RPS24
Turquoise	DisGeNET.25	Brain Edema	20/63	5.5606e-08	1.19864e-05	5.35599	89.4717	NDUFB9;TIMMDC1;NDUFA11;NAXE;NDUFB3;IL18;NDUFA1;S100B;NDUFS6;NDUFS4;NDUFAF5;NDUFS3;NDUFAF2;NDUFS2;NDUFAF3;ASL;TMEM126B;NDUFV2;MYL9;NDUFV1
Turquoise	Reactome_2016.207	Pausing and recovery of Tat-mediated HIV elongation Homo sapiens R-HSA-167238	12/31	2.40608e-06	1.20651e-05	7.246	93.7452	POLR2D;SUPT4H1;POLR2F;TCEA1;POLR2G;POLR2H;POLR2I;GTF2F1;POLR2J;GTF2F2;POLR2K;POLR2L
Turquoise	Reactome_2016.208	Tat-mediated HIV elongation arrest and recovery Homo sapiens R-HSA-167243	12/31	2.40608e-06	1.20651e-05	7.246	93.7452	POLR2D;SUPT4H1;POLR2F;TCEA1;POLR2G;POLR2H;POLR2I;GTF2F1;POLR2J;GTF2F2;POLR2K;POLR2L
Turquoise	DisGeNET.26	Abnormal heart beat	26/100	6.10496e-08	1.2185e-05	4.05438	67.3496	RPL5;COX7B;NDUFB11;RPL11;HCCS;TMEM70;RPS17;RPS19;RPL35;RPL15;RPL18;HRAS;PHYH;RPS7;GPX4;RPL35A;A2ML1;RPS26;PEX7;RPS28;RIT1;RPS27;RPS29;RPL27;RPL26;RPS24
Turquoise	DisGeNET.27	ECG abnormality	26/100	6.10496e-08	1.2185e-05	4.05438	67.3496	RPL5;COX7B;NDUFB11;RPL11;HCCS;TMEM70;RPS17;RPS19;RPL35;RPL15;RPL18;HRAS;PHYH;RPS7;GPX4;RPL35A;A2ML1;RPS26;PEX7;RPS28;RIT1;RPS27;RPS29;RPL27;RPL26;RPS24
Turquoise	GO_Biological_Process_2018.116	nucleotide-excision repair, DNA damage recognition (GO:0000715)	11/23	4.9374e-07	1.27777e-05	10.5142	152.679	COPS4;COPS3;COPS6;COPS5;UBB;CETN2;GPS1;COPS8;RPS27A;UBA52;RBX1
Turquoise	Reactome_2016.209	mTORC1-mediated signalling Homo sapiens R-HSA-166208	10/22	2.96798e-06	1.48115e-05	9.5524	121.579	RRAGA;RRAGB;RHEB;RPS6;AKT1S1;LAMTOR2;LAMTOR1;LAMTOR4;LAMTOR3;LAMTOR5
Turquoise	GO_Biological_Process_2018.117	protein targeting (GO:0006605)	29/133	6.49891e-07	1.6675e-05	3.21853	45.8526	NDUFB8;TIMM9;RPL11;TIMM13;TIMM10;SRP14;MFF;GABARAP;TOMM22;SEC61G;TIMM17B;AP4S1;VTI1B;DNAJC19;PEX16;TIMM8B;FIS1;PMM1;TMEM50A;AIP;TIMM23;TIMM22;TIMM10B;SPCS3;SPCS2;SPCS1;CDC37;TOMM7;TOMM5
Turquoise	Reactome_2016.210	SUMO is conjugated to E1 (UBA2:SAE1) Homo sapiens R-HSA-3065676	5/5	3.39243e-06	1.68491e-05	Inf	Inf	SUMO1;SUMO3;SUMO2;UBA2;SAE1
Turquoise	Reactome_2016.211	RNA Pol II CTD phosphorylation and interaction with CE Homo sapiens R-HSA-167160	11/27	3.51705e-06	1.73032e-05	7.88393	99.0056	POLR2D;POLR2F;POLR2G;POLR2H;POLR2I;GTF2F1;POLR2J;GTF2F2;POLR2K;GTF2H5;POLR2L
Turquoise	Reactome_2016.212	RNA Pol II CTD phosphorylation and interaction with CE Homo sapiens R-HSA-77075	11/27	3.51705e-06	1.73032e-05	7.88393	99.0056	POLR2D;POLR2F;POLR2G;POLR2H;POLR2I;GTF2F1;POLR2J;GTF2F2;POLR2K;GTF2H5;POLR2L
Turquoise	Reactome_2016.213	HIV elongation arrest and recovery Homo sapiens R-HSA-167287	12/32	3.56767e-06	1.73074e-05	6.88332	86.3416	POLR2D;SUPT4H1;POLR2F;TCEA1;POLR2G;POLR2H;POLR2I;GTF2F1;POLR2J;GTF2F2;POLR2K;POLR2L
Turquoise	Reactome_2016.214	Pausing and recovery of HIV elongation Homo sapiens R-HSA-167290	12/32	3.56767e-06	1.73074e-05	6.88332	86.3416	POLR2D;SUPT4H1;POLR2F;TCEA1;POLR2G;POLR2H;POLR2I;GTF2F1;POLR2J;GTF2F2;POLR2K;POLR2L
Turquoise	Reactome_2016.215	Elongation arrest and recovery Homo sapiens R-HSA-112387	12/32	3.56767e-06	1.73074e-05	6.88332	86.3416	POLR2D;SUPT4H1;POLR2F;TCEA1;POLR2G;POLR2H;POLR2I;GTF2F1;POLR2J;GTF2F2;POLR2K;POLR2L
Turquoise	GO_Biological_Process_2018.118	positive regulation of establishment of protein localization to telomere (GO:1904851)	7/9	6.82371e-07	1.736e-05	40.0669	568.858	CCT6A;CCT2;TCP1;CCT8;CCT7;CCT5;CCT4
Turquoise	DisGeNET.28	Cardiac conduction abnormality	26/102	9.42118e-08	1.81324e-05	3.94725	63.8575	RPL5;COX7B;NDUFB11;RPL11;HCCS;TMEM70;RPS17;RPS19;RPL35;RPL15;RPL18;HRAS;PHYH;RPS7;GPX4;RPL35A;A2ML1;RPS26;PEX7;RPS28;RIT1;RPS27;RPS29;RPL27;RPL26;RPS24
Turquoise	Reactome_2016.216	HIV Transcription Elongation Homo sapiens R-HSA-167169	14/43	3.90404e-06	1.86785e-05	5.54252	69.0237	NCBP2;SUPT4H1;GTF2F1;GTF2F2;GTF2H5;POLR2D;POLR2F;TCEA1;POLR2G;POLR2H;POLR2I;POLR2J;POLR2K;POLR2L
Turquoise	Reactome_2016.217	Tat-mediated elongation of the HIV-1 transcript Homo sapiens R-HSA-167246	14/43	3.90404e-06	1.86785e-05	5.54252	69.0237	NCBP2;SUPT4H1;GTF2F1;GTF2F2;GTF2H5;POLR2D;POLR2F;TCEA1;POLR2G;POLR2H;POLR2I;POLR2J;POLR2K;POLR2L
Turquoise	Reactome_2016.218	Formation of HIV-1 elongation complex containing HIV-1 Tat Homo sapiens R-HSA-167200	14/43	3.90404e-06	1.86785e-05	5.54252	69.0237	NCBP2;SUPT4H1;GTF2F1;GTF2F2;GTF2H5;POLR2D;POLR2F;TCEA1;POLR2G;POLR2H;POLR2I;POLR2J;POLR2K;POLR2L
Turquoise	Reactome_2016.219	MAPK family signaling cascades Homo sapiens R-HSA-5683057	46/284	4.16389e-06	1.98308e-05	2.23854	27.7334	PSMD10;PSMD12;PSMD14;PSMD13;ARAF;PEBP1;PHB;ARRB2;PSMA7;PSMB10;PSMD8;PSMB6;CDC42;PSMD9;PSMB7;PPP2CB;PSMD6;PSMB4;PSMD7;PSMB5;PSMD4;PSMB2;UBB;PSMB3;PSMB1;RPS27A;HRAS;PSMB8;RBX1;PSMA5;PSMA6;PSMA3;PSMC5;PSMA4;PSMC6;PSMA1;PSMC3;PSMA2;PSMC4;PSMC1;PSMC2;PSME1;PSME2;LAMTOR2;UBA52;LAMTOR3
Turquoise	GO_Biological_Process_2018.119	RNA splicing (GO:0008380)	25/106	8.1236e-07	2.04933e-05	3.55793	49.8941	DBR1;DDX25;GEMIN2;RNF113A;SNRPD2;SNRPD1;TRA2B;MAGOH;ZMAT5;SNRPD3;BCAS2;ZRSR2;NCBP2;LSM1;ZCRB1;MAGOHB;LSM4;SMU1;LSM6;SNRPG;LUC7L3;RP9;PPIG;SNRPF;SNRNP25
Turquoise	DisGeNET.29	Electrocardiogram abnormal	26/103	1.16452e-07	2.164e-05	3.89578	62.1991	RPL5;COX7B;NDUFB11;RPL11;HCCS;TMEM70;RPS17;RPS19;RPL35;RPL15;RPL18;HRAS;PHYH;RPS7;GPX4;RPL35A;A2ML1;RPS26;PEX7;RPS28;RIT1;RPS27;RPS29;RPL27;RPL26;RPS24
Turquoise	Reactome_2016.220	DNA Damage Recognition in GG-NER Homo sapiens R-HSA-5696394	13/38	4.62987e-06	2.19498e-05	5.96765	73.3005	CETN2;GPS1;RBX1;COPS4;TFPT;COPS3;COPS6;COPS5;UBB;RUVBL1;RPS27A;COPS8;UBA52
Turquoise	GO_Biological_Process_2018.120	positive regulation of viral process (GO:0048524)	15/44	9.06523e-07	2.26062e-05	5.94213	82.6767	TSG101;GTF2B;SUPT4H1;GTF2F1;GTF2F2;POLR2D;MVB12A;POLR2F;POLR2G;POLR2H;POLR2I;PPIB;POLR2J;POLR2K;POLR2L
Turquoise	GO_Biological_Process_2018.121	proteolysis involved in cellular protein catabolic process (GO:0051603)	23/93	9.11175e-07	2.26062e-05	3.78518	52.6464	ZRANB1;NEDD8;PSMB10;PSMA7;PSMB8;PSMA5;PSMB6;PSMA6;PSMB7;PSMA3;PSMB4;PSMA4;PSMB5;PSMA1;PSMB2;PSMA2;PSMB3;CLPP;PSMB1;CHMP4B;STUB1;RPS27A;UBA52
Turquoise	Reactome_2016.221	MicroRNA (miRNA) biogenesis Homo sapiens R-HSA-203927	10/23	4.87126e-06	2.29897e-05	8.81712	107.852	PRKRA;POLR2D;POLR2F;POLR2G;POLR2H;POLR2I;POLR2J;POLR2K;RAN;POLR2L
Turquoise	Reactome_2016.222	Formation of HIV elongation complex in the absence of HIV Tat Homo sapiens R-HSA-167152	14/44	5.30289e-06	2.46916e-05	5.35747	65.0786	NCBP2;SUPT4H1;GTF2F1;GTF2F2;GTF2H5;POLR2D;POLR2F;TCEA1;POLR2G;POLR2H;POLR2I;POLR2J;POLR2K;POLR2L
Turquoise	Reactome_2016.223	RNA Polymerase II Transcription Elongation Homo sapiens R-HSA-75955	14/44	5.30289e-06	2.46916e-05	5.35747	65.0786	NCBP2;SUPT4H1;GTF2F1;GTF2F2;GTF2H5;POLR2D;POLR2F;TCEA1;POLR2G;POLR2H;POLR2I;POLR2J;POLR2K;POLR2L
Turquoise	Reactome_2016.224	Formation of RNA Pol II elongation complex Homo sapiens R-HSA-112382	14/44	5.30289e-06	2.46916e-05	5.35747	65.0786	NCBP2;SUPT4H1;GTF2F1;GTF2F2;GTF2H5;POLR2D;POLR2F;TCEA1;POLR2G;POLR2H;POLR2I;POLR2J;POLR2K;POLR2L
Turquoise	Reactome_2016.225	SLBP Dependent Processing of Replication-Dependent Histone Pre-mRNAs Homo sapiens R-HSA-77588	7/11	5.40919e-06	2.50746e-05	20.0313	242.928	LSM10;SLBP;NCBP2;SNRPG;SNRPE;SNRPD3;SNRPF
Turquoise	DisGeNET.30	Electrocardiographic changes	26/104	1.43478e-07	2.57735e-05	3.84562	60.5958	RPL5;COX7B;NDUFB11;RPL11;HCCS;TMEM70;RPS17;RPS19;RPL35;RPL15;RPL18;HRAS;PHYH;RPS7;GPX4;RPL35A;A2ML1;RPS26;PEX7;RPS28;RIT1;RPS27;RPS29;RPL27;RPL26;RPS24
Turquoise	GO_Biological_Process_2018.122	protein catabolic process (GO:0030163)	21/81	1.17242e-06	2.88492e-05	4.02918	55.0242	HSP90AA1;HTRA2;UCHL3;USE1;RNF5;PSMB10;PSMA7;PSMB8;PSMA5;PSMB6;PSMA6;PSMB7;PSMA3;PSMB4;PSMA4;PSMB5;PSMA1;PSMB2;PSMA2;PSMB3;PSMB1
Turquoise	GO_Biological_Process_2018.123	peptidyl-proline modification (GO:0018208)	14/40	1.45552e-06	3.55241e-05	6.18305	83.1011	FKBP2;PPIL1;NTMT1;FKBP8;PPIE;PIN1;PPIH;PPIG;PPIL3;FKBP4;PPIB;PPIA;FKBP3;PPID
Turquoise	Reactome_2016.226	RNA polymerase II transcribes snRNA genes Homo sapiens R-HSA-6807505	19/77	8.21433e-06	3.79095e-05	3.76683	44.1082	GTF2A2;NCBP2;GTF2B;TAF9;TAF11;PHAX;GTF2F1;GTF2F2;GTF2E2;SNAPC5;SNAPC2;POLR2D;POLR2F;POLR2G;POLR2H;POLR2I;POLR2J;POLR2K;POLR2L
Turquoise	GO_Biological_Process_2018.124	nuclear-transcribed mRNA catabolic process, exonucleolytic (GO:0000291)	13/35	1.58782e-06	3.82177e-05	6.78253	90.5681	LSM1;WDR61;LSM5;LSM4;LSM3;EXOSC7;LSM7;LSM6;EXOSC9;POLR2G;CNOT8;DCPS;EXOSC2
Turquoise	GO_Biological_Process_2018.125	multivesicular body assembly (GO:0036258)	12/30	1.59134e-06	3.82177e-05	7.64897	102.121	TSG101;CHMP1A;MVB12A;CHMP2A;VPS37D;CHMP4B;SNF8;CHMP6;VPS25;CHMP7;VPS28;CHMP5
Turquoise	GO_Biological_Process_2018.126	maturation of SSU-rRNA (GO:0030490)	15/46	1.72918e-06	4.11985e-05	5.55816	73.7449	RPS8;UTP3;MRPS11;TSR3;NGDN;FCF1;SNU13;RPS14;EMG1;MRPS9;RPS28;RPS16;LSM6;RPS19;RPS24
Turquoise	GO_Biological_Process_2018.127	snRNA transcription (GO:0009301)	19/70	1.77178e-06	4.15537e-05	4.28548	56.7549	GTF2A2;NCBP2;GTF2B;TAF9;TAF11;PHAX;GTF2F1;GTF2F2;GTF2E2;SNAPC5;SNAPC2;POLR2D;POLR2F;POLR2G;POLR2H;POLR2I;POLR2J;POLR2K;POLR2L
Turquoise	GO_Biological_Process_2018.128	snRNA transcription from RNA polymerase II promoter (GO:0042795)	19/70	1.77178e-06	4.15537e-05	4.28548	56.7549	GTF2A2;NCBP2;GTF2B;TAF9;TAF11;PHAX;GTF2F1;GTF2F2;GTF2E2;SNAPC5;SNAPC2;POLR2D;POLR2F;POLR2G;POLR2H;POLR2I;POLR2J;POLR2K;POLR2L
Turquoise	GO_Biological_Process_2018.129	positive regulation of transcription initiation from RNA polymerase II promoter (GO:0060261)	9/17	1.89045e-06	4.39933e-05	12.8905	169.88	PSMC5;PSMC6;PSMC3;PSMC4;GTF2B;SUB1;PSMC1;PSMC2;GTF2F2
Turquoise	Reactome_2016.227	VEGFA-VEGFR2 Pathway Homo sapiens R-HSA-4420097	49/320	1.01054e-05	4.64313e-05	2.09436	24.0903	ARAF;PEBP1;BRK1;ARRB2;PSMD8;PSMD9;PSMD6;PSMD7;PSMD4;HRAS;HSP90AA1;CYBA;RBX1;PSMA5;PSMA6;PSMA3;PSMA4;PSMA1;PSMA2;PSME1;PSME2;UBA52;PSMD10;PSMD12;PSMD14;PSMD13;PHB;PSMA7;PSMB10;PSMB6;CDC42;PSMB7;PPP2CB;PSMB4;PSMB5;PSMB2;UBB;PSMB3;PSMB1;RPS27A;PSMB8;PSMC5;PSMC6;PSMC3;PSMC4;PSMC1;PSMC2;LAMTOR2;LAMTOR3
Turquoise	GO_Biological_Process_2018.130	regulation of establishment of protein localization to telomere (GO:0070203)	7/10	2.1151e-06	4.84697e-05	26.7098	349.002	CCT6A;CCT2;TCP1;CCT8;CCT7;CCT5;CCT4
Turquoise	GO_Biological_Process_2018.131	protein deneddylation (GO:0000338)	7/10	2.1151e-06	4.84697e-05	26.7098	349.002	COPS4;COPS3;COPS6;COPS5;TOR1A;GPS1;COPS8
Turquoise	Reactome_2016.228	Signaling by ERBB4 Homo sapiens R-HSA-1236394	50/330	1.10743e-05	5.06602e-05	2.06871	23.6058	ARAF;PEBP1;ARRB2;PSMD8;PSMD9;PSMD6;PSMD7;PSMD4;HRAS;SKP1;PSENEN;RBX1;PSMA5;PSMA6;PSMA3;PSMA4;PSMA1;PSMA2;AKT1S1;PSME1;PSME2;UBA52;PSMD10;PSMD12;PSMD14;PSMD13;PHB;PSMA7;PSMB10;PSMB6;PSMB7;PPP2CB;PSMB4;PSMB5;PSMB2;UBB;PSMB3;PSMB1;RPS27A;BAD;S100B;PSMB8;PSMC5;PSMC6;PSMC3;PSMC4;PSMC1;PSMC2;LAMTOR2;LAMTOR3
Turquoise	Reactome_2016.229	APC-Cdc20 mediated degradation of Nek2A Homo sapiens R-HSA-179409	10/25	1.19794e-05	5.45614e-05	7.64067	86.5866	ANAPC15;ANAPC16;UBB;CDC16;UBE2E1;ANAPC4;BUB3;RPS27A;UBA52;ANAPC11
Turquoise	GO_Biological_Process_2018.132	multivesicular body organization (GO:0036257)	12/31	2.40608e-06	5.47201e-05	7.246	93.7452	TSG101;CHMP1A;MVB12A;CHMP2A;VPS37D;CHMP4B;SNF8;CHMP6;VPS25;CHMP7;VPS28;CHMP5
Turquoise	DisGeNET.31	Hyperreflexia	51/301	3.15122e-07	5.47804e-05	2.36872	35.4605	NDUFA11;NDUFA12;PQBP1;GCSH;AUH;SPR;CHMP1A;HRAS;RFC2;GLRX5;AMT;SDHD;NDUFS8;NDUFS7;NDUFS6;SDHAF1;NDUFS4;NDUFS3;NDUFS2;HPRT1;TMEM126B;FTL;RNASEH2C;NDUFB9;PEX11B;NDUFB3;MFF;HSD17B10;PTS;HSPD1;ZNHIT3;AP4S1;NDUFV2;NDUFV1;CCT5;TOE1;PEX16;NDUFA9;NOP56;SURF1;TIMMDC1;NDUFA2;NDUFA1;PYCR2;SOD1;PINK1;PRKRA;UQCRQ;NDUFAF5;NDUFAF2;NDUFAF3
Turquoise	DisGeNET.32	Muscle Spasticity	57/353	3.43445e-07	5.78384e-05	2.23891	33.3244	ISCA2;NDUFA11;NDUFA12;HIKESHI;TREM2;WDR45;PQBP1;TXN2;SPR;CHMP1A;ATP6V1E1;RFC2;EED;IL18;SDHD;SUMF1;PEX7;TYROBP;NDUFS8;NDUFS7;NDUFS6;BOLA3;SDHAF1;NDUFS4;NDUFS3;NDUFS2;HPRT1;TMEM126B;PFN1;FTL;GCDH;RNASEH2C;NDUFB9;ECHS1;RNASEH2A;PEX11B;NDUFB3;MFF;HSD17B10;NDUFV2;HNRNPA1;NDUFV1;PEX16;NDUFA9;SURF1;EIF2B3;TIMMDC1;NDUFA2;NDUFA1;PYCR2;SOD1;SUCLA2;NDUFAF5;NDUFAF2;NDUFAF3;STUB1;ITM2B
Turquoise	Reactome_2016.230	Protein folding Homo sapiens R-HSA-391251	22/101	1.43457e-05	6.50546e-05	3.20454	35.7373	CCT3;NOP56;CCT2;VBP1;ARL2;TBCB;TBCA;GNG13;CCT6A;GNG10;TUBA1A;TCP1;PFDN1;FBXO6;PFDN2;CCT8;PFDN4;CCT7;PFDN5;PFDN6;CCT5;CCT4
Turquoise	Reactome_2016.231	FCERI mediated MAPK activation Homo sapiens R-HSA-2871796	45/289	1.49032e-05	6.72903e-05	2.13396	23.7167	PSMD10;PSMD12;PSMD14;PSMD13;ARAF;PEBP1;PHB;ARRB2;PSMA7;PSMB10;PSMD8;PSMB6;PSMD9;PSMB7;PPP2CB;PSMD6;PSMB4;PSMD7;PSMB5;PSMD4;PSMB2;UBB;PSMB3;PSMB1;RPS27A;HRAS;PSMB8;RBX1;PSMA5;PSMA6;PSMA3;PSMC5;PSMA4;PSMC6;PSMA1;PSMC3;PSMA2;PSMC4;PSMC1;PSMC2;PSME1;PSME2;LAMTOR2;UBA52;LAMTOR3
Turquoise	GO_Biological_Process_2018.133	protein peptidyl-prolyl isomerization (GO:0000413)	13/37	3.28793e-06	7.42133e-05	6.21664	78.4867	FKBP2;PPIL1;FKBP8;PPIE;PIN1;PPIH;PPIG;PPIL3;FKBP4;PPIB;PPIA;FKBP3;PPID
Turquoise	GO_Biological_Process_2018.134	7-methylguanosine mRNA capping (GO:0006370)	12/32	3.56767e-06	7.93345e-05	6.88332	86.3416	NCBP2;POLR2D;POLR2F;POLR2G;POLR2H;POLR2I;GTF2F1;POLR2J;GTF2F2;POLR2K;GTF2H5;POLR2L
Turquoise	GO_Biological_Process_2018.135	7-methylguanosine RNA capping (GO:0009452)	12/32	3.56767e-06	7.93345e-05	6.88332	86.3416	NCBP2;POLR2D;POLR2F;POLR2G;POLR2H;POLR2I;GTF2F1;POLR2J;GTF2F2;POLR2K;GTF2H5;POLR2L
Turquoise	DisGeNET.33	Encephalopathy, Subacute Necrotizing, Infantile	10/19	5.31269e-07	8.42061e-05	12.7386	184.047	NDUFA9;SURF1;ECHS1;NDUFS8;NDUFS7;NDUFA12;NDUFA2;NDUFS4;NDUFS3;NDUFAF2
Turquoise	DisGeNET.34	Encephalopathy, Subacute Necrotizing, Juvenile	10/19	5.31269e-07	8.42061e-05	12.7386	184.047	NDUFA9;SURF1;ECHS1;NDUFS8;NDUFS7;NDUFA12;NDUFA2;NDUFS4;NDUFS3;NDUFAF2
Turquoise	Reactome_2016.232	SUMO is transferred from E1 to E2 (UBE2I, UBC9) Homo sapiens R-HSA-3065678	5/6	1.89908e-05	8.53769e-05	57.1704	621.531	SUMO1;SUMO3;SUMO2;UBA2;SAE1
Turquoise	DisGeNET.35	Cytochrome-c Oxidase Deficiency	16/48	5.58254e-07	8.59551e-05	5.74671	82.7438	COX8A;COA3;SURF1;PET100;COX4I1;COX6A1;COX5A;COX6B1;SOD1;MRPL44;PINK1;SCO2;ETHE1;COX14;COA6;COX20
Turquoise	Reactome_2016.233	Signaling by VEGF Homo sapiens R-HSA-194138	49/328	1.97885e-05	8.85811e-05	2.03341	22.0227	ARAF;PEBP1;BRK1;ARRB2;PSMD8;PSMD9;PSMD6;PSMD7;PSMD4;HRAS;HSP90AA1;CYBA;RBX1;PSMA5;PSMA6;PSMA3;PSMA4;PSMA1;PSMA2;PSME1;PSME2;UBA52;PSMD10;PSMD12;PSMD14;PSMD13;PHB;PSMA7;PSMB10;PSMB6;CDC42;PSMB7;PPP2CB;PSMB4;PSMB5;PSMB2;UBB;PSMB3;PSMB1;RPS27A;PSMB8;PSMC5;PSMC6;PSMC3;PSMC4;PSMC1;PSMC2;LAMTOR2;LAMTOR3
Turquoise	DisGeNET.36	Dystonic disease	31/148	6.88429e-07	0.000103054	3.0599	43.4165	TSEN34;GCDH;RNASEH2C;RNASEH2A;ECHS1;NDUFA12;HTRA2;WDR45;PTS;TXN2;AUH;SPR;NDUFA9;BCAP31;TSFM;SURF1;NDUFA2;DNAJC12;SDHD;PINK1;NDUFS8;SUCLA2;NDUFS7;UQCRQ;NDUFS4;SDHAF1;NDUFAF2;NDUFS3;HPRT1;MMADHC;FTL
Turquoise	GO_Biological_Process_2018.136	regulation of macroautophagy (GO:0016241)	25/116	4.69286e-06	0.000103588	3.16522	38.8356	SCOC;NPRL2;PRKAG1;SNX32;ATG101;SESN1;ATP6V1H;ATP6V1E1;ATP6V1D;SNX5;ATP6V1C2;ATP6V1G1;ATP6V0B;RAB33A;IFT20;RRAGA;PINK1;CDK5;RRAGB;RHEB;LAMTOR2;LAMTOR1;LAMTOR4;LAMTOR3;LAMTOR5
Turquoise	GO_Biological_Process_2018.137	viral budding (GO:0046755)	10/23	4.87126e-06	0.000106741	8.81712	107.852	TSG101;CHMP1A;CHMP2A;MVB12A;VPS37D;CHMP4B;CHMP6;CHMP7;VPS28;CHMP5
Turquoise	Reactome_2016.234	Assembly Of The HIV Virion Homo sapiens R-HSA-175474	7/13	2.43327e-05	0.000108457	13.3527	141.855	TSG101;UBB;VPS37D;RPS27A;PPIA;UBA52;VPS28
Turquoise	WikiPathways_2019_Human.8	Pyrimidine metabolism WP4022	21/85	2.73186e-06	0.000109616	3.77653	48.3793	DTYMK;DUT;NME2;NME3;NME1;NT5C;POLE4;POLD4;UCK1;POLR1C;POLR2D;POLR1D;CMPK1;POLR2G;POLR3H;POLR2H;POLR2I;DCTPP1;POLR2J;POLR2K;POLR2L
Turquoise	GO_Biological_Process_2018.138	exonucleolytic nuclear-transcribed mRNA catabolic process involved in deadenylation-dependent decay (GO:0043928)	12/33	5.19581e-06	0.000113028	6.55519	79.7613	EXOSC7;LSM7;LSM6;EXOSC9;LSM1;WDR61;LSM5;CNOT8;EXOSC2;DCPS;LSM4;LSM3
Turquoise	GO_Biological_Process_2018.139	MAPK cascade (GO:0000165)	45/278	5.36353e-06	0.000114355	2.23606	27.1365	PSMD10;PSMD12;PSMD14;PSMD13;ARAF;PEBP1;PSMA7;PSMB10;PSMD8;PSMB6;PSMD9;PSMB7;PSMD6;PSMB4;PSMD7;PSMB5;PSMD4;PSMB2;UBB;PSMB3;PSMB1;RPS27A;HRAS;SKP1;IL18;MT3;PSMB8;RBX1;PSMA5;PSMA6;PSMA3;PSMC5;PSMA4;PSMC6;PSMA1;PSMC3;PSMA2;PSMC4;PSMC1;PSMC2;PSME1;PSME2;LAMTOR2;UBA52;LAMTOR3
Turquoise	GO_Biological_Process_2018.140	positive regulation of protein localization to chromosome, telomeric region (GO:1904816)	7/11	5.40919e-06	0.000114355	20.0313	242.928	CCT6A;CCT2;TCP1;CCT8;CCT7;CCT5;CCT4
Turquoise	GO_Biological_Process_2018.141	proteasome assembly (GO:0043248)	7/11	5.40919e-06	0.000114355	20.0313	242.928	PSMD10;PSMD8;PSMD9;PSMD4;PSMD13;POMP;PSMG1
Turquoise	GO_Biological_Process_2018.142	regulation of RNA polymerase II transcriptional preinitiation complex assembly (GO:0045898)	7/11	5.40919e-06	0.000114355	20.0313	242.928	PSMC5;PSMC6;PSMC3;PSMC4;PSMC1;PSMC2;HMGB1
Turquoise	GO_Biological_Process_2018.143	macroautophagy (GO:0016236)	24/110	5.7737e-06	0.000121207	3.21413	38.7695	GABARAPL2;TSG101;EI24;PRKAG1;VPS37D;SNF8;DYNLL1;GABARAP;TOMM22;PINK1;UBB;ATG101;CHMP2A;MVB12A;TOMM7;CHMP4B;CHMP6;RPS27A;VPS25;UBA52;VPS28;UBXN6;TOMM5;TOMM6
Turquoise	Reactome_2016.235	Deadenylation-dependent mRNA decay Homo sapiens R-HSA-429914	14/50	2.73169e-05	0.000121241	4.4631	46.8983	EIF4A2;EIF4A1;LSM1;LSM5;LSM4;LSM3;EXOSC7;LSM7;LSM6;EXOSC9;CNOT8;EXOSC2;DCPS;PAIP1
Turquoise	GO_Biological_Process_2018.144	protein ubiquitination (GO:0016567)	70/506	5.9632e-06	0.000124316	1.86782	22.4697	UBE2D2;MAGEF1;ARRB2;FBXO22;PSMD8;PSMD9;PSMD6;RNF114;PSMD7;PSMD4;RACK1;ELOB;FBXO6;ELOC;SKP1;UBE2E3;UBE2E1;COMMD1;UCHL3;RBX1;PSMA5;PSMA6;PSMA3;RRAGA;PSMA4;PSMA1;PSMA2;PSME1;PSME2;UBA52;RNF166;PSMD10;PSMD12;PCNA;ANAPC16;PSMD14;PSMD13;DERL1;WDR61;NEDD8;RNF7;RNF5;PSMA7;PSMB10;ANAPC11;PSMB6;PCNP;PSMB7;PSMB4;PSMB5;PSMB2;UBB;PSMB3;PSMB1;RPS27A;UBE2B;RNF25;PSMB8;PSMC5;PINK1;PSMC6;PSMC3;PSMC4;UBE2S;PSMC1;P…
Turquoise	GO_Biological_Process_2018.145	protein import into mitochondrial matrix (GO:0030150)	9/19	6.19011e-06	0.000128157	10.3113	123.659	DNAJC19;GRPEL1;PAM16;TOMM7;TIMM23;TIMM17B;TOMM40L;TOMM22;TIMM50
Turquoise	GO_Biological_Process_2018.146	positive regulation of RNA polymerase II transcriptional preinitiation complex assembly (GO:0045899)	6/8	6.62346e-06	0.000136189	34.3217	409.283	PSMC5;PSMC6;PSMC3;PSMC4;PSMC1;PSMC2
Turquoise	Reactome_2016.236	FGFR2 mutant receptor activation Homo sapiens R-HSA-1839126	11/33	3.31947e-05	0.000146704	5.7319	59.1138	NCBP2;POLR2D;POLR2F;POLR2G;POLR2H;POLR2I;GTF2F1;POLR2J;GTF2F2;POLR2K;POLR2L
Turquoise	Reactome_2016.237	DAP12 signaling Homo sapiens R-HSA-2424491	50/344	3.42574e-05	0.000150762	1.96868	20.2412	ARAF;PEBP1;TREM2;ARRB2;PSMD8;PSMD9;PSMD6;PSMD7;PSMD4;B2M;HRAS;RBX1;PSMA5;PSMA6;PSMA3;PSMA4;TYROBP;PSMA1;PSMA2;AKT1S1;PSME1;PSME2;UBA52;PSMD10;PSMD12;PSMD14;PSMD13;PHB;PSMA7;PSMB10;PSMB6;PSMB7;PPP2CB;PSMB4;PSMB5;PSMB2;UBB;PSMB3;PSMB1;RPS27A;BAD;PSMB8;PSMC5;PSMC6;PSMC3;PSMC4;PSMC1;PSMC2;LAMTOR2;LAMTOR3
Turquoise	Reactome_2016.238	RNA Polymerase III Chain Elongation Homo sapiens R-HSA-73780	8/18	3.68821e-05	0.00016163	9.15988	93.502	CRCP;POLR1C;POLR1D;POLR2F;POLR3H;POLR2H;POLR2K;POLR2L
Turquoise	Reactome_2016.239	RNA Polymerase III Transcription Initiation From Type 3 Promoter Homo sapiens R-HSA-76071	10/28	3.8421e-05	0.00016767	6.36619	64.7244	SNAPC5;CRCP;SNAPC2;POLR1C;POLR1D;POLR2F;POLR3H;POLR2H;POLR2K;POLR2L
Turquoise	Reactome_2016.240	rRNA modification in the nucleus Homo sapiens R-HSA-6790901	15/58	3.99286e-05	0.000173523	4.00442	40.5585	NOP56;RPS9;RPS7;IMP3;UTP3;RPS6;FCF1;RRP7A;RCL1;TRMT112;RPS14;EMG1;NHP2;RPS2;NOP10
Turquoise	Reactome_2016.241	RNA Polymerase III Transcription Termination Homo sapiens R-HSA-73980	9/23	4.06899e-05	0.00017537	7.3636	74.4425	SSB;CRCP;POLR1C;POLR1D;POLR2F;POLR3H;POLR2H;POLR2K;POLR2L
Turquoise	Reactome_2016.242	APC/C:Cdc20 mediated degradation of Cyclin B Homo sapiens R-HSA-174048	9/23	4.06899e-05	0.00017537	7.3636	74.4425	ANAPC15;ANAPC16;UBB;CDC16;UBE2E1;ANAPC4;RPS27A;UBA52;ANAPC11
Turquoise	GO_Biological_Process_2018.147	regulation of viral transcription (GO:0046782)	13/40	8.83103e-06	0.000180345	5.525	64.2957	GTF2B;SUPT4H1;GTF2F1;GTF2F2;PSMC3;POLR2D;POLR2F;POLR2G;POLR2H;POLR2I;POLR2J;POLR2K;POLR2L
Turquoise	DisGeNET.37	Nicotinamide adenine dinucleotide coenzyme Q reductase deficiency	15/45	1.25878e-06	0.00018334	5.74374	78.0308	NDUFB9;NDUFB6;NDUFA11;NDUFA12;NDUFA1;NDUFS8;NDUFS7;NDUFS6;NDUFS4;NDUFS3;NDUFAF2;NDUFS2;NDUFAF3;NDUFV2;NDUFV1
Turquoise	Reactome_2016.243	SLBP independent Processing of Histone Pre-mRNAs Homo sapiens R-HSA-111367	6/10	4.30921e-05	0.000184959	17.159	172.485	LSM10;NCBP2;SNRPG;SNRPE;SNRPD3;SNRPF
Turquoise	KEGG_2019_Human.13	Cardiac muscle contraction	19/78	1.00466e-05	0.00020557	3.70278	42.6126	COX8A;COX7B;UQCRB;COX4I1;UQCR11;COX7A2;UQCR10;COX6A1;COX5B;COX6C;COX7C;COX5A;UQCRHL;COX6B1;COX7A2L;UQCRQ;UQCRFS1;UQCRC2;CYC1
Turquoise	DisGeNET.38	Pallor of optic disc	18/63	1.46034e-06	0.0002071	4.59987	61.8078	NDUFB9;TIMMDC1;NDUFA11;NDUFB3;NDUFA1;ARL2BP;NDUFS6;NDUFS4;NDUFAF5;IDH3B;NDUFS3;NDUFAF2;NDUFS2;NDUFAF3;TMEM126B;NDUFV2;NDUFV1;ITM2B
Turquoise	GO_Biological_Process_2018.148	viral budding via host ESCRT complex (GO:0039702)	9/20	1.04484e-05	0.000211484	9.37338	107.504	TSG101;CHMP1A;CHMP2A;MVB12A;VPS37D;CHMP4B;CHMP6;CHMP7;VPS28
Turquoise	GO_Biological_Process_2018.149	regulation of mitochondrial membrane potential (GO:0051881)	12/35	1.04967e-05	0.000211484	5.98452	68.6092	PRDX3;STOML2;PRELID1;PINK1;UBB;PPA2;BAD;ARL6IP5;BAX;PARK7;SLC25A33;SOD1
Turquoise	Reactome_2016.244	Metabolism of nucleotides Homo sapiens R-HSA-15869	19/87	5.19639e-05	0.000222124	3.21113	31.6777	DTYMK;DUT;GPX1;NUDT1;NME2;AK2;GLRX;TXN;NME1;NT5C;NUDT9;UCK1;GUK1;IMPDH2;CMPK1;HPRT1;ADPRM;DCTPP1;ITPA
Turquoise	GO_Biological_Process_2018.150	positive regulation of viral transcription (GO:0050434)	13/41	1.19809e-05	0.000239778	5.32739	60.371	GTF2B;TAF11;SUPT4H1;GTF2F1;GTF2F2;POLR2D;POLR2F;POLR2G;POLR2H;POLR2I;POLR2J;POLR2K;POLR2L
Turquoise	GO_Biological_Process_2018.151	positive regulation of establishment of protein localization (GO:1904951)	7/12	1.2074e-05	0.000240041	16.0242	181.465	CCT6A;CCT2;TCP1;CCT8;CCT7;CCT5;CCT4
Turquoise	DisGeNET.39	LEIGH SYNDROME DUE TO MITOCHONDRIAL COMPLEX I DEFICIENCY	10/21	1.74521e-06	0.000241152	10.4214	138.173	NDUFA9;SURF1;NDUFS8;NDUFS7;NDUFA12;SCO2;NDUFS4;NDUFAF5;NDUFS3;NDUFV1
Turquoise	Reactome_2016.245	Citric acid cycle (TCA cycle) Homo sapiens R-HSA-71403	8/19	5.92037e-05	0.000252039	8.32671	81.0565	FH;SUCLA2;IDH3G;IDH3B;SDHC;SUCLG1;SDHD;SDHB
Turquoise	WikiPathways_2019_Human.9	Parkin-Ubiquitin Proteasomal System pathway WP2359	18/70	7.59386e-06	0.000270848	3.97914	46.9068	PSMD10;PSMD12;PSMD14;PSMD13;HSPA14;PSMD8;PSMD9;PSMD6;PSMC5;PSMD7;TUBA1A;PSMC6;PSMD4;PSMC3;PSMC4;PSMC1;PSMC2;STUB1
Turquoise	Reactome_2016.246	Signaling by SCF-KIT Homo sapiens R-HSA-1433557	47/325	6.59102e-05	0.000279449	1.95504	18.8216	PSMD10;PSMD12;PSMD14;PSMD13;ARAF;PEBP1;PHB;ARRB2;PSMA7;PSMB10;PSMD8;PSMB6;PSMD9;PSMB7;PPP2CB;PSMD6;PSMB4;PSMD7;PSMB5;PSMD4;PSMB2;UBB;PSMB3;PSMB1;RPS27A;HRAS;BAD;PSMB8;RBX1;PSMA5;PSMA6;PSMA3;PSMC5;PSMA4;PSMC6;PSMA1;PSMC3;PSMA2;PSMC4;PSMC1;PSMC2;AKT1S1;PSME1;PSME2;LAMTOR2;UBA52;LAMTOR3
Turquoise	GO_Biological_Process_2018.152	regulation of ubiquitin protein ligase activity (GO:1904666)	12/36	1.4594e-05	0.000288231	5.73485	63.857	RPL5;RAB1A;ANAPC15;ANAPC16;RPS7;UBE2S;RPL23;RPL11;CDC16;UBE2E1;ANAPC4;ANAPC11
Turquoise	Reactome_2016.247	Membrane Trafficking Homo sapiens R-HSA-199991	57/420	7.27265e-05	0.0003071	1.8189	17.332	SCOC;MCFD2;CLTB;PRKAG1;CLTA;USE1;PPP6C;YWHAQ;TMED3;RAB8A;TMED9;SEC13;TRAPPC2L;VPS37D;DYNLL1;COPZ1;BET1L;TRAPPC6A;TRAPPC6B;CHMP4B;NAA38;CHMP6;VPS25;UBA52;SEC22A;CHMP7;VPS28;ARF5;FTL;CHMP5;DCTN6;RAB1A;DYNC1I2;RAB5C;TSG101;DCTN3;ARL1;BLOC1S4;ARFRP1;BLOC1S6;SNX2;UBB;BLOC1S1;BNIP1;CLVS2;AP4S1;RPS27A;SNX5;TRAPPC3;TRAPPC4;TRAPPC5;M6PR;ASPSCR1;SNF8;CHMP2A;RAB9A;COPE
Turquoise	KEGG_2019_Human.14	RNA polymerase	11/31	1.68856e-05	0.000320826	6.30577	69.2945	POLR2D;POLR1C;POLR1D;POLR2F;POLR2G;POLR3H;POLR2H;POLR2I;POLR2J;POLR2K;POLR2L
Turquoise	Reactome_2016.248	Signaling by EGFR Homo sapiens R-HSA-177929	50/355	7.77571e-05	0.000327019	1.89652	17.9447	ARAF;CLTA;PEBP1;ARRB2;PSMD8;PSMD9;PSMD6;PSMD7;PSMD4;HRAS;RBX1;PSMA5;PSMA6;PSMA3;PSMA4;PSMA1;PSMA2;AKT1S1;PSME1;PSME2;UBA52;PSMD10;PSMD12;PSMD14;PSMD13;PHB;PSMA7;PSMB10;PSMB6;CDC42;PSMB7;PPP2CB;PSMB4;PSMB5;PSMB2;UBB;PSMB3;PSMB1;AP2S1;RPS27A;BAD;PSMB8;PSMC5;PSMC6;PSMC3;PSMC4;PSMC1;PSMC2;LAMTOR2;LAMTOR3
Turquoise	Reactome_2016.249	Formation of tubulin folding intermediates by CCT/TriC Homo sapiens R-HSA-389960	9/25	8.77237e-05	0.000364444	6.44245	60.181	CCT3;CCT6A;CCT2;TUBA1A;TCP1;CCT8;CCT7;CCT5;CCT4
Turquoise	Reactome_2016.250	Synthesis and interconversion of nucleotide di- and triphosphates Homo sapiens R-HSA-499943	9/25	8.77237e-05	0.000364444	6.44245	60.181	DTYMK;GUK1;AK2;NME2;CMPK1;GLRX;TXN;DCTPP1;NME1
Turquoise	Reactome_2016.251	Membrane binding and targetting of GAG proteins Homo sapiens R-HSA-174490	6/11	8.8312e-05	0.000364444	13.7264	128.131	TSG101;UBB;VPS37D;RPS27A;UBA52;VPS28
Turquoise	Reactome_2016.252	Synthesis And Processing Of GAG, GAGPOL Polyproteins Homo sapiens R-HSA-174495	6/11	8.8312e-05	0.000364444	13.7264	128.131	TSG101;UBB;VPS37D;RPS27A;UBA52;VPS28
Turquoise	Reactome_2016.253	Downstream signaling of activated FGFR2 Homo sapiens R-HSA-5654696	47/329	8.91019e-05	0.000364444	1.92688	17.9696	PSMD10;PSMD12;PSMD14;PSMD13;ARAF;PEBP1;PHB;ARRB2;PSMA7;PSMB10;PSMD8;PSMB6;PSMD9;PSMB7;PPP2CB;PSMD6;PSMB4;PSMD7;PSMB5;PSMD4;PSMB2;UBB;PSMB3;PSMB1;RPS27A;HRAS;BAD;PSMB8;RBX1;PSMA5;PSMA6;PSMA3;PSMC5;PSMA4;PSMC6;PSMA1;PSMC3;PSMA2;PSMC4;PSMC1;PSMC2;AKT1S1;PSME1;PSME2;LAMTOR2;UBA52;LAMTOR3
Turquoise	Reactome_2016.254	Downstream signaling of activated FGFR4 Homo sapiens R-HSA-5654716	47/329	8.91019e-05	0.000364444	1.92688	17.9696	PSMD10;PSMD12;PSMD14;PSMD13;ARAF;PEBP1;PHB;ARRB2;PSMA7;PSMB10;PSMD8;PSMB6;PSMD9;PSMB7;PPP2CB;PSMD6;PSMB4;PSMD7;PSMB5;PSMD4;PSMB2;UBB;PSMB3;PSMB1;RPS27A;HRAS;BAD;PSMB8;RBX1;PSMA5;PSMA6;PSMA3;PSMC5;PSMA4;PSMC6;PSMA1;PSMC3;PSMA2;PSMC4;PSMC1;PSMC2;AKT1S1;PSME1;PSME2;LAMTOR2;UBA52;LAMTOR3
Turquoise	Reactome_2016.255	Downstream signaling of activated FGFR3 Homo sapiens R-HSA-5654708	47/329	8.91019e-05	0.000364444	1.92688	17.9696	PSMD10;PSMD12;PSMD14;PSMD13;ARAF;PEBP1;PHB;ARRB2;PSMA7;PSMB10;PSMD8;PSMB6;PSMD9;PSMB7;PPP2CB;PSMD6;PSMB4;PSMD7;PSMB5;PSMD4;PSMB2;UBB;PSMB3;PSMB1;RPS27A;HRAS;BAD;PSMB8;RBX1;PSMA5;PSMA6;PSMA3;PSMC5;PSMA4;PSMC6;PSMA1;PSMC3;PSMA2;PSMC4;PSMC1;PSMC2;AKT1S1;PSME1;PSME2;LAMTOR2;UBA52;LAMTOR3
Turquoise	GO_Biological_Process_2018.153	spliceosomal snRNP assembly (GO:0000387)	12/37	2.00209e-05	0.000392828	5.50516	59.5589	SNRPD2;SNRPD1;GEMIN2;CLNS1A;SNRPG;STRAP;SNRPE;SNRPD3;GEMIN7;SNRPF;SNRPC;LSM4
Turquoise	Reactome_2016.256	DAP12 interactions Homo sapiens R-HSA-2172127	50/359	0.000103317	0.000420935	1.87156	17.1766	ARAF;PEBP1;TREM2;ARRB2;PSMD8;PSMD9;PSMD6;PSMD7;PSMD4;B2M;HRAS;RBX1;PSMA5;PSMA6;PSMA3;PSMA4;TYROBP;PSMA1;PSMA2;AKT1S1;PSME1;PSME2;UBA52;PSMD10;PSMD12;PSMD14;PSMD13;PHB;PSMA7;PSMB10;PSMB6;PSMB7;PPP2CB;PSMB4;PSMB5;PSMB2;UBB;PSMB3;PSMB1;RPS27A;BAD;PSMB8;PSMC5;PSMC6;PSMC3;PSMC4;PSMC1;PSMC2;LAMTOR2;LAMTOR3
Turquoise	DisGeNET.40	Cytopenia	37/206	3.16751e-06	0.000426742	2.53081	32.0465	RPL5;RBM8A;RPL31;PEX11B;RPL11;NUDT1;RPL9;RPS14;RPS17;RPS19;RPL13;RPL15;RPL18;HRAS;RPL19;ZRSR2;NPM1;GPX1;RPS7;UROS;GLRX5;RPL35A;FANCE;RPS26;SLC25A38;RPS28;RPS27;G6PC3;HAX1;RPS29;SBDS;NHP2;CYCS;RPL27;RPL26;RPS24;NOP10
Turquoise	Reactome_2016.257	Signaling by FGFR2 in disease Homo sapiens R-HSA-5655253	12/43	0.00010525	0.000427143	4.43819	40.6502	NCBP2;POLR2D;POLR2F;POLR2G;POLR2H;POLR2I;GTF2F1;HRAS;POLR2J;GTF2F2;POLR2K;POLR2L
Turquoise	GO_Biological_Process_2018.154	virion assembly (GO:0019068)	8/17	2.20498e-05	0.000429828	10.1782	109.133	RAB1A;TSG101;UBB;CHMP4B;RPS27A;PPIA;UBA52;CHMP5
Turquoise	Reactome_2016.258	Signaling by FGFR4 Homo sapiens R-HSA-5654743	47/332	0.000111124	0.000447499	1.90628	17.3565	PSMD10;PSMD12;PSMD14;PSMD13;ARAF;PEBP1;PHB;ARRB2;PSMA7;PSMB10;PSMD8;PSMB6;PSMD9;PSMB7;PPP2CB;PSMD6;PSMB4;PSMD7;PSMB5;PSMD4;PSMB2;UBB;PSMB3;PSMB1;RPS27A;HRAS;BAD;PSMB8;RBX1;PSMA5;PSMA6;PSMA3;PSMC5;PSMA4;PSMC6;PSMA1;PSMC3;PSMA2;PSMC4;PSMC1;PSMC2;AKT1S1;PSME1;PSME2;LAMTOR2;UBA52;LAMTOR3
Turquoise	Reactome_2016.259	Downstream signaling of activated FGFR1 Homo sapiens R-HSA-5654687	47/332	0.000111124	0.000447499	1.90628	17.3565	PSMD10;PSMD12;PSMD14;PSMD13;ARAF;PEBP1;PHB;ARRB2;PSMA7;PSMB10;PSMD8;PSMB6;PSMD9;PSMB7;PPP2CB;PSMD6;PSMB4;PSMD7;PSMB5;PSMD4;PSMB2;UBB;PSMB3;PSMB1;RPS27A;HRAS;BAD;PSMB8;RBX1;PSMA5;PSMA6;PSMA3;PSMC5;PSMA4;PSMC6;PSMA1;PSMC3;PSMA2;PSMC4;PSMC1;PSMC2;AKT1S1;PSME1;PSME2;LAMTOR2;UBA52;LAMTOR3
Turquoise	Reactome_2016.260	Signaling by FGFR3 Homo sapiens R-HSA-5654741	47/333	0.000119496	0.000479364	1.89951	17.1568	PSMD10;PSMD12;PSMD14;PSMD13;ARAF;PEBP1;PHB;ARRB2;PSMA7;PSMB10;PSMD8;PSMB6;PSMD9;PSMB7;PPP2CB;PSMD6;PSMB4;PSMD7;PSMB5;PSMD4;PSMB2;UBB;PSMB3;PSMB1;RPS27A;HRAS;BAD;PSMB8;RBX1;PSMA5;PSMA6;PSMA3;PSMC5;PSMA4;PSMC6;PSMA1;PSMC3;PSMA2;PSMC4;PSMC1;PSMC2;AKT1S1;PSME1;PSME2;LAMTOR2;UBA52;LAMTOR3
Turquoise	GO_Biological_Process_2018.155	protein maturation (GO:0051604)	19/83	2.59358e-05	0.000502318	3.41257	36.0364	PSENEN;SRGN;ISCA2;POP5;GLRX3;GLRX5;MAGEF1;LIAS;HSPD1;GCSH;NFU1;BOLA2;NDUFAB1;PMPCB;STUB1;UQCRC2;ISCU;RHBDL1;METAP2
Turquoise	DisGeNET.41	Congenital anemia	37/208	4.0024e-06	0.000526071	2.50094	31.0832	RPL5;RBM8A;RPL31;PEX11B;RPL11;NUDT1;RPL9;RPS14;RPS17;RPS19;RPL13;RPL15;RPL18;HRAS;RPL19;ZRSR2;NPM1;GPX1;RPS7;UROS;GLRX5;RPL35A;FANCE;RPS26;SLC25A38;RPS28;RPS27;G6PC3;HAX1;RPS29;SBDS;NHP2;CYCS;RPL27;RPL26;RPS24;NOP10
Turquoise	GO_Biological_Process_2018.156	nuclear-transcribed mRNA catabolic process, deadenylation-dependent decay (GO:0000288)	16/63	2.846e-05	0.000547673	3.90946	40.9203	EIF4A2;EIF4A1;LSM1;WDR61;LSM5;LSM4;LSM3;EXOSC7;LSM7;LSM6;EXOSC9;POLR2D;CNOT8;EXOSC2;DCPS;PAIP1
Turquoise	Reactome_2016.261	Signaling by FGFR1 Homo sapiens R-HSA-5654736	47/336	0.000148162	0.000592079	1.87948	16.5718	PSMD10;PSMD12;PSMD14;PSMD13;ARAF;PEBP1;PHB;ARRB2;PSMA7;PSMB10;PSMD8;PSMB6;PSMD9;PSMB7;PPP2CB;PSMD6;PSMB4;PSMD7;PSMB5;PSMD4;PSMB2;UBB;PSMB3;PSMB1;RPS27A;HRAS;BAD;PSMB8;RBX1;PSMA5;PSMA6;PSMA3;PSMC5;PSMA4;PSMC6;PSMA1;PSMC3;PSMA2;PSMC4;PSMC1;PSMC2;AKT1S1;PSME1;PSME2;LAMTOR2;UBA52;LAMTOR3
Turquoise	DisGeNET.42	Respiratory Failure	34/185	4.6542e-06	0.000597178	2.60046	31.9277	NDUFB9;NDUFA11;NDUFA12;NDUFB3;HTRA2;TREM2;TMEM70;NFU1;STMN1;NDUFV2;HNRNPA1;NDUFV1;HRAS;NDUFA9;TSFM;SURF1;TIMMDC1;NDUFA2;NDUFA1;SOD1;NDUFS8;NDUFS7;EIF3K;NDUFS6;BOLA3;NDUFAF5;NDUFS4;NDUFAF2;NDUFS3;NDUFAF3;NDUFS2;SUCLG1;TMEM126B;PFN1
Turquoise	GO_Biological_Process_2018.157	DNA-templated transcription, termination (GO:0006353)	22/106	3.18585e-05	0.000609166	3.01297	31.197	SLBP;CHTOP;RBM8A;NCBP2;SSU72;UPF3B;MAGOHB;THOC7;GTF2H5;LSM10;SARNP;MAGOH;POLR1C;SNRPG;SRSF3;POLR2F;SNRPE;SNRPD3;SNRPF;POLR2H;POLR2K;POLR2L
Turquoise	WikiPathways_2019_Human.10	Eukaryotic Transcription Initiation WP405	13/43	2.13523e-05	0.000685408	4.97169	53.4673	GTF2A2;GTF2B;TAF9;GTF2F2;GTF2E2;POLR1D;POLR2F;POLR2G;POLR3H;POLR2H;POLR2I;POLR2J;POLR2K
Turquoise	Reactome_2016.262	Chaperonin-mediated protein folding Homo sapiens R-HSA-390466	19/95	0.000180212	0.000717407	2.87186	24.7594	CCT3;NOP56;CCT2;VBP1;GNG13;CCT6A;GNG10;TUBA1A;TCP1;PFDN1;FBXO6;PFDN2;CCT8;PFDN4;CCT7;PFDN5;PFDN6;CCT5;CCT4
Turquoise	DisGeNET.43	Lethargy	24/110	5.7737e-06	0.000723592	3.21413	38.7695	NDUFB9;EIF2B3;MRPS16;TIMMDC1;NDUFA11;NDUFB3;AMT;NDUFA1;GCSH;NFU1;NDUFS6;SLC25A19;BOLA3;NDUFAF5;NDUFS4;NDUFAF2;NDUFS3;NDUFAF3;NDUFS2;ASL;TMEM126B;NDUFV2;NDUFV1;MMADHC
Turquoise	Reactome_2016.263	mTOR signalling Homo sapiens R-HSA-165159	11/39	0.000183116	0.000726197	4.50216	38.7429	RRAGA;RRAGB;RHEB;RPS6;AKT1S1;PRKAG1;LAMTOR2;LAMTOR1;LAMTOR4;LAMTOR3;LAMTOR5
Turquoise	GO_Biological_Process_2018.158	regulation of translation (GO:0006417)	35/213	4.15295e-05	0.000789061	2.26896	22.8918	EIF4A2;RPL5;CDC123;RPL10;DDX25;DDX1;RPS4X;RIDA;MTRF1;POLR2D;RACK1;RPS3;EIF4H;POLR2F;NUP43;POLR2G;POLR2H;POLR2I;POLR2J;POLR2K;PAIP1;POLR2L;TSFM;NPM1;NCBP2;PYM1;UPF3B;RPL13A;EIF1;EIF3H;EIF3E;RPL26;CNOT8;EIF1B;RAN
Turquoise	Reactome_2016.264	Pink/Parkin Mediated Mitophagy Homo sapiens R-HSA-5205685	8/22	0.000201138	0.00079165	6.54134	55.6768	PINK1;UBB;TOMM7;RPS27A;UBA52;TOMM5;TOMM22;TOMM6
Turquoise	Reactome_2016.265	Mitophagy Homo sapiens R-HSA-5205647	8/22	0.000201138	0.00079165	6.54134	55.6768	PINK1;UBB;TOMM7;RPS27A;UBA52;TOMM5;TOMM22;TOMM6
Turquoise	GO_Biological_Process_2018.159	protein-cofactor linkage (GO:0018065)	6/10	4.30921e-05	0.000813601	17.159	172.485	GCSH;POP5;SDHAF2;GLRX5;NDUFAB1;LIAS
Turquoise	GO_Biological_Process_2018.160	antigen receptor-mediated signaling pathway (GO:0050851)	40/257	4.38435e-05	0.000822613	2.12925	21.3668	PSMD10;PSMD12;STOML2;PSMD14;PSMD13;UBE2D2;PSMA7;PSMB10;PSMD8;PSMB6;PSMD9;PSMB7;PSMD6;PSMB4;PSMD7;PSMB5;PSMD4;PSMB2;UBB;PSMB3;PSMB1;RPS27A;SKP1;EIF2B3;PSMB8;PSMA5;PSMA6;PSMA3;PSMC5;PSMA4;PSMC6;PSMA1;PSMC3;PSMA2;PSMC4;PSMC1;PSMC2;PSME1;PSME2;UBA52
Turquoise	Reactome_2016.266	Downstream signal transduction Homo sapiens R-HSA-186763	47/341	0.000210017	0.000823488	1.84701	15.6411	PSMD10;PSMD12;PSMD14;PSMD13;ARAF;PEBP1;PHB;ARRB2;PSMA7;PSMB10;PSMD8;PSMB6;PSMD9;PSMB7;PPP2CB;PSMD6;PSMB4;PSMD7;PSMB5;PSMD4;PSMB2;UBB;PSMB3;PSMB1;RPS27A;HRAS;BAD;PSMB8;RBX1;PSMA5;PSMA6;PSMA3;PSMC5;PSMA4;PSMC6;PSMA1;PSMC3;PSMA2;PSMC4;PSMC1;PSMC2;AKT1S1;PSME1;PSME2;LAMTOR2;UBA52;LAMTOR3
Turquoise	GO_Biological_Process_2018.161	regulation of protein ubiquitination (GO:0031396)	21/101	4.64607e-05	0.000866305	3.01859	30.1161	PSMD10;HSP90AA1;NDFIP1;UBXN1;CENPX;PHF23;PINX1;DERL1;PARK7;ARRB2;COMMD1;GTPBP4;PINK1;UBB;SVBP;RPS3;STUB1;WASHC1;CDK5RAP3;VPS28;CENPS
Turquoise	Reactome_2016.267	PKB-mediated events Homo sapiens R-HSA-109703	11/40	0.000234328	0.000909701	4.34668	36.333	RRAGA;RRAGB;RHEB;RPS6;AKT1S1;PRKAG1;LAMTOR2;LAMTOR1;LAMTOR4;LAMTOR3;LAMTOR5
Turquoise	Reactome_2016.268	Cleavage of Growing Transcript in the Termination Region Homo sapiens R-HSA-109688	14/60	0.000235493	0.000909701	3.49096	29.1629	SLBP;CHTOP;RBM8A;NCBP2;UPF3B;THOC7;LSM10;SARNP;MAGOH;SNRPG;SRSF3;SNRPE;SNRPD3;SNRPF
Turquoise	Reactome_2016.269	RNA Polymerase II Transcription Termination Homo sapiens R-HSA-73856	14/60	0.000235493	0.000909701	3.49096	29.1629	SLBP;CHTOP;RBM8A;NCBP2;UPF3B;THOC7;LSM10;SARNP;MAGOH;SNRPG;SRSF3;SNRPE;SNRPD3;SNRPF
Turquoise	Reactome_2016.270	Post-Elongation Processing of the Transcript Homo sapiens R-HSA-76044	14/60	0.000235493	0.000909701	3.49096	29.1629	SLBP;CHTOP;RBM8A;NCBP2;UPF3B;THOC7;LSM10;SARNP;MAGOH;SNRPG;SRSF3;SNRPE;SNRPD3;SNRPF
Turquoise	Reactome_2016.271	Energy dependent regulation of mTOR by LKB1-AMPK Homo sapiens R-HSA-380972	9/28	0.000237629	0.000911201	5.42433	45.265	RRAGA;RRAGB;RHEB;PRKAG1;LAMTOR2;LAMTOR1;LAMTOR4;LAMTOR3;LAMTOR5
Turquoise	Reactome_2016.272	Recognition of DNA damage by PCNA-containing replication complex Homo sapiens R-HSA-110314	9/28	0.000237629	0.000911201	5.42433	45.265	POLD4;PCNA;UBB;UBE2B;RFC2;RPA3;RPS27A;UBA52;RBX1
Turquoise	DisGeNET.44	Psychomotor regression, progressive	29/150	8.28979e-06	0.000911708	2.76376	32.3374	NDUFB9;NDUFA11;NAXE;PEX11B;NDUFB3;TREM2;HSD17B10;PIGY;NDUFV2;NDUFV1;PEX16;PHYH;EIF2B3;TIMMDC1;NDUFA1;SDHD;SUMF1;PEX7;TYROBP;NDUFS6;ETHE1;NDUFAF5;NDUFS4;SDHAF1;NDUFAF2;NDUFS3;NDUFAF3;NDUFS2;TMEM126B
Turquoise	DisGeNET.45	Loss of developmental milestones	29/150	8.28979e-06	0.000911708	2.76376	32.3374	NDUFB9;NDUFA11;NAXE;PEX11B;NDUFB3;TREM2;HSD17B10;PIGY;NDUFV2;NDUFV1;PEX16;PHYH;EIF2B3;TIMMDC1;NDUFA1;SDHD;SUMF1;PEX7;TYROBP;NDUFS6;ETHE1;NDUFAF5;NDUFS4;SDHAF1;NDUFAF2;NDUFS3;NDUFAF3;NDUFS2;TMEM126B
Turquoise	DisGeNET.46	Mental deterioration in childhood	29/150	8.28979e-06	0.000911708	2.76376	32.3374	NDUFB9;NDUFA11;NAXE;PEX11B;NDUFB3;TREM2;HSD17B10;PIGY;NDUFV2;NDUFV1;PEX16;PHYH;EIF2B3;TIMMDC1;NDUFA1;SDHD;SUMF1;PEX7;TYROBP;NDUFS6;ETHE1;NDUFAF5;NDUFS4;SDHAF1;NDUFAF2;NDUFS3;NDUFAF3;NDUFS2;TMEM126B
Turquoise	DisGeNET.47	Neurodevelopmental regression	29/150	8.28979e-06	0.000911708	2.76376	32.3374	NDUFB9;NDUFA11;NAXE;PEX11B;NDUFB3;TREM2;HSD17B10;PIGY;NDUFV2;NDUFV1;PEX16;PHYH;EIF2B3;TIMMDC1;NDUFA1;SDHD;SUMF1;PEX7;TYROBP;NDUFS6;ETHE1;NDUFAF5;NDUFS4;SDHAF1;NDUFAF2;NDUFS3;NDUFAF3;NDUFS2;TMEM126B
Turquoise	DisGeNET.48	Psychomotor regression	29/150	8.28979e-06	0.000911708	2.76376	32.3374	NDUFB9;NDUFA11;NAXE;PEX11B;NDUFB3;TREM2;HSD17B10;PIGY;NDUFV2;NDUFV1;PEX16;PHYH;EIF2B3;TIMMDC1;NDUFA1;SDHD;SUMF1;PEX7;TYROBP;NDUFS6;ETHE1;NDUFAF5;NDUFS4;SDHAF1;NDUFAF2;NDUFS3;NDUFAF3;NDUFS2;TMEM126B
Turquoise	DisGeNET.49	Psychomotor regression beginning in infancy	29/150	8.28979e-06	0.000911708	2.76376	32.3374	NDUFB9;NDUFA11;NAXE;PEX11B;NDUFB3;TREM2;HSD17B10;PIGY;NDUFV2;NDUFV1;PEX16;PHYH;EIF2B3;TIMMDC1;NDUFA1;SDHD;SUMF1;PEX7;TYROBP;NDUFS6;ETHE1;NDUFAF5;NDUFS4;SDHAF1;NDUFAF2;NDUFS3;NDUFAF3;NDUFS2;TMEM126B
Turquoise	WikiPathways_2019_Human.11	TCA Cycle (aka Krebs or citric acid cycle) WP78	8/18	3.68821e-05	0.00107629	9.15988	93.502	FH;SUCLA2;IDH3G;IDH3B;SDHC;SUCLG1;SDHD;SDHB
Turquoise	Reactome_2016.273	NGF signalling via TRKA from the plasma membrane Homo sapiens R-HSA-187037	50/374	0.000281944	0.00107717	1.78343	14.5774	ARAF;CLTA;PEBP1;ARRB2;PSMD8;PSMD9;PSMD6;PSMD7;PSMD4;HRAS;RBX1;PSMA5;PSMA6;PSMA3;PSMA4;PSMA1;PSMA2;AKT1S1;PSME1;PSME2;UBA52;PSMD10;PSMD12;PSMD14;PSMD13;PHB;PSMA7;PSMB10;PSMB6;PSMB7;PPP2CB;PSMB4;PSMB5;PSMB2;UBB;PSMB3;PSMB1;AP2S1;RPS27A;BAD;PSMB8;PSMC5;RIT1;PSMC6;PSMC3;PSMC4;PSMC1;PSMC2;LAMTOR2;LAMTOR3
Turquoise	GO_Biological_Process_2018.162	histone mRNA metabolic process (GO:0008334)	9/24	6.04557e-05	0.0011203	6.87232	66.755	LSM10;SLBP;SSB;NCBP2;LSM1;SNRPG;SNRPE;SNRPF;SNRPD3
Turquoise	Reactome_2016.274	RNA Polymerase III Abortive And Retractive Initiation Homo sapiens R-HSA-749476	11/41	0.000297131	0.00112694	4.20156	34.1223	SNAPC5;CRCP;SSB;SNAPC2;POLR1C;POLR1D;POLR2F;POLR3H;POLR2H;POLR2K;POLR2L
Turquoise	Reactome_2016.275	RNA Polymerase III Transcription Homo sapiens R-HSA-74158	11/41	0.000297131	0.00112694	4.20156	34.1223	SNAPC5;CRCP;SSB;SNAPC2;POLR1C;POLR1D;POLR2F;POLR3H;POLR2H;POLR2K;POLR2L
Turquoise	GO_Biological_Process_2018.163	protein import into mitochondrial inner membrane (GO:0045039)	5/7	6.20231e-05	0.00113533	28.5836	276.918	NDUFA13;TIMM9;TIMM13;TIMM22;TIMM10
Turquoise	GO_Biological_Process_2018.164	protein maturation by iron-sulfur cluster transfer (GO:0097428)	5/7	6.20231e-05	0.00113533	28.5836	276.918	NFU1;GLRX3;MAGEF1;BOLA2;ISCU
Turquoise	WikiPathways_2019_Human.12	Translation Factors WP107	14/52	4.42165e-05	0.00118279	4.22774	42.3891	EIF4A2;EIF4A1;EIF2B3;EIF2S2;EIF1;EEF1B2;EEF1A1;EEF1G;EIF3I;EIF4H;EIF3G;EIF3H;EIF3E;PAIP1
Turquoise	Reactome_2016.276	HSF1 activation Homo sapiens R-HSA-3371511	9/29	0.000320073	0.00120518	5.15284	41.4647	EEF1A1;HSP90AA1;DNAJB6;UBB;HSBP1;MRPL18;PTGES3;RPA3;FKBP4
Turquoise	Reactome_2016.277	PIWI-interacting RNA (piRNA) biogenesis Homo sapiens R-HSA-5601884	9/29	0.000320073	0.00120518	5.15284	41.4647	HSP90AA1;POLR2D;POLR2F;POLR2G;POLR2H;POLR2I;POLR2J;POLR2K;POLR2L
Turquoise	Reactome_2016.278	Processing and activation of SUMO Homo sapiens R-HSA-3215018	5/9	0.000324172	0.00121623	14.2903	114.811	SUMO1;SUMO3;SUMO2;UBA2;SAE1
Turquoise	Reactome_2016.279	Pyruvate metabolism and Citric Acid (TCA) cycle Homo sapiens R-HSA-71406	12/48	0.000327812	0.00122548	3.82074	30.654	FH;SUCLA2;MPC1;IDH3G;MPC2;IDH3B;SDHC;SUCLG1;PDHB;SDHD;HAGH;SDHB
Turquoise	DisGeNET.50	Psychomotor regression in infants	29/153	1.23469e-05	0.00133075	2.69646	30.4756	NDUFB9;NDUFA11;NAXE;PEX11B;NDUFB3;TREM2;HSD17B10;PIGY;NDUFV2;NDUFV1;PEX16;PHYH;EIF2B3;TIMMDC1;NDUFA1;SDHD;SUMF1;PEX7;TYROBP;NDUFS6;ETHE1;NDUFAF5;NDUFS4;SDHAF1;NDUFAF2;NDUFS3;NDUFAF3;NDUFS2;TMEM126B
Turquoise	KEGG_2019_Human.15	Citrate cycle (TCA cycle)	10/30	7.57559e-05	0.0013434	5.72895	54.3562	FH;SUCLA2;MDH1;IDH3G;IDH3B;SDHC;SUCLG1;PDHB;SDHD;SDHB
Turquoise	Reactome_2016.280	Viral Messenger RNA Synthesis Homo sapiens R-HSA-168325	11/42	0.000373527	0.00139139	4.0658	32.0895	POLR2D;POLR2F;NUP43;POLR2G;POLR2H;POLR2I;GTF2F1;POLR2J;GTF2F2;POLR2K;POLR2L
Turquoise	GO_Biological_Process_2018.165	termination of RNA polymerase II transcription (GO:0006369)	16/68	7.76784e-05	0.00141328	3.53259	33.4286	SLBP;CHTOP;RBM8A;NCBP2;SSU72;UPF3B;MAGOHB;THOC7;LSM10;SARNP;MAGOH;SNRPG;SRSF3;SNRPE;SNRPD3;SNRPF
Turquoise	GO_Biological_Process_2018.166	cellular protein complex assembly (GO:0043623)	26/144	8.01901e-05	0.00145019	2.53647	23.9217	SRP19;PSMD13;POMP;CLTB;ARL2;CLTA;HSPD1;PSMD8;SAMM50;PSMD4;AP2S1;EIF4H;SKP1;CCT2;HSP90AA1;GPX4;VBP1;PTGES3;CYBA;RBX1;IMMP1L;NDUFAF7;TCP1;CHMP2A;PSMG1;PFDN6
Turquoise	DisGeNET.51	Developmental regression	29/154	1.40575e-05	0.0014854	2.67474	29.8831	NDUFB9;NDUFA11;NAXE;PEX11B;NDUFB3;TREM2;HSD17B10;PIGY;NDUFV2;NDUFV1;PEX16;PHYH;EIF2B3;TIMMDC1;NDUFA1;SDHD;SUMF1;PEX7;TYROBP;NDUFS6;ETHE1;NDUFAF5;NDUFS4;SDHAF1;NDUFAF2;NDUFS3;NDUFAF3;NDUFS2;TMEM126B
Turquoise	Reactome_2016.281	RNA Polymerase III Transcription Initiation Homo sapiens R-HSA-76046	10/36	0.000409984	0.00152175	4.40544	34.3598	SNAPC5;CRCP;SNAPC2;POLR1C;POLR1D;POLR2F;POLR3H;POLR2H;POLR2K;POLR2L
Turquoise	GO_Biological_Process_2018.167	DNA-templated transcription, initiation (GO:0006352)	31/186	8.49146e-05	0.00152643	2.30493	21.6061	GTF2A2;CRCP;GTF2B;TAF9;AKR1B1;NAT14;GTF2E2;MED30;MED31;POLR2D;POLR2F;POLR2G;POLR2H;POLR2I;POLR2J;POLR2K;NR2C2AP;POLR2L;TAF10;TAF11;GTF2F1;GTF2F2;MED6;GTF2H5;MED7;NR2F6;CDK4;POLR1C;TFAM;BAX;POLR3H
Turquoise	Reactome_2016.282	DNA Repair Homo sapiens R-HSA-73894	40/285	0.000415326	0.00153612	1.883	14.6619	PCNA;CETN2;GPS1;BABAM1;TFPT;POLD4;PPP4C;UBB;SUMO1;SUMO3;RUVBL1;SUMO2;POLR2D;POLR2F;POLR2G;POLR2H;RPS27A;POLR2I;POLR2J;POLR2K;HMGN1;POLR2L;UBE2B;RFC2;FANCE;GTF2H5;RBX1;COPS4;COPS3;COPS6;COPS5;TDP2;RPA3;APEX1;TCEA1;PPIE;NEIL1;ZNF830;COPS8;UBA52
Turquoise	GO_Biological_Process_2018.168	hydrogen peroxide metabolic process (GO:0042743)	8/20	9.17075e-05	0.00163226	7.6324	70.9577	PRDX3;PRDX2;PRDX5;GPX1;PRDX1;CYBA;PARK7;SOD1
Turquoise	GO_Biological_Process_2018.169	tRNA processing (GO:0008033)	15/62	9.18893e-05	0.00163226	3.66282	34.0457	TSEN34;POP5;SSB;TYW5;METTL1;RPP30;URM1;DDX1;RTCB;ZBTB8OS;HSD17B10;C9ORF64;QTRT1;RPP21;RPP38
Turquoise	GO_Biological_Process_2018.170	glutathione metabolic process (GO:0006749)	13/49	9.70994e-05	0.00171466	4.14172	38.2686	GSTM3;GPX1;GSTO1;GSTP1;PARK7;SOD1;EEF1G;GGCT;EEF1E1-BLOC1S5;NAT8;ETHE1;HAGH;GSTT2B
Turquoise	DisGeNET.52	Cardiac Arrhythmia	26/132	1.69425e-05	0.00175583	2.82547	31.0397	RPL5;COX7B;NDUFB11;RPL11;HCCS;TMEM70;RPS17;RPS19;RPL35;RPL15;RPL18;HRAS;PHYH;RPS7;GPX4;RPL35A;A2ML1;RPS26;PEX7;RPS28;RIT1;RPS27;RPS29;RPL27;RPL26;RPS24
Turquoise	Reactome_2016.283	Metabolism of non-coding RNA Homo sapiens R-HSA-194441	12/50	0.000491381	0.00180462	3.61925	27.5725	SNRPD2;SNRPD1;NCBP2;GEMIN2;CLNS1A;SNRPG;PHAX;SNRPE;NUP43;SNRPD3;SNRPF;GEMIN7
Turquoise	Reactome_2016.284	snRNP Assembly Homo sapiens R-HSA-191859	12/50	0.000491381	0.00180462	3.61925	27.5725	SNRPD2;SNRPD1;NCBP2;GEMIN2;CLNS1A;SNRPG;PHAX;SNRPE;NUP43;SNRPD3;SNRPF;GEMIN7
Turquoise	GO_Biological_Process_2018.171	nucleobase-containing small molecule interconversion (GO:0015949)	10/31	0.00010379	0.00182208	5.45584	50.0472	DTYMK;DUT;GUK1;AK2;NME2;CMPK1;NME3;GLRX;TXN;NME1
Turquoise	GO_Biological_Process_2018.172	ERAD pathway (GO:0036503)	17/77	0.000109952	0.00191905	3.25354	29.6575	TOR1A;DERL1;TMUB1;AUP1;RNF5;PSMC5;PSMC6;PSMC3;PSMC4;PSMC1;JKAMP;PSMC2;FBXO6;SEC61B;SDF2;UBXN6;GET4
Turquoise	GO_Biological_Process_2018.173	negative regulation of protein ubiquitination (GO:0031397)	13/50	0.000121618	0.00211038	4.02956	36.325	RPL5;UBXN1;RPS7;RPL23;PINX1;RPL11;PARK7;ARRB2;GTPBP4;PDCL3;SVBP;RPS3;VPS28
Turquoise	DisGeNET.53	Comatose	18/75	2.12364e-05	0.0021593	3.6291	39.0484	NDUFB9;TIMMDC1;NDUFA11;NAXE;NDUFB3;NDUFA1;HMGCL;NDUFS6;NDUFS4;NDUFAF5;NDUFS3;NDUFAF2;NDUFS2;NDUFAF3;ASL;TMEM126B;NDUFV2;NDUFV1
Turquoise	KEGG_2019_Human.16	Protein processing in endoplasmic reticulum	28/165	0.000133438	0.0022184	2.35327	20.9955	SAR1A;TUSC3;UBE2D2;RPN1;DERL1;RNF5;SEC61G;BAG1;FBXO6;SEC61B;SEC62;UBXN6;SKP1;BCAP31;SEC13;HSP90AA1;SSR4;SSR2;PDIA6;RBX1;NSFL1C;DAD1;DDIT3;ERP29;BAX;STUB1;P4HB;ATF4
Turquoise	Reactome_2016.285	Inhibition of the proteolytic activity of APC/C required for the onset of anaphase by mitotic spindle checkpoint components Homo sapiens R-HSA-141405	7/20	0.000663853	0.00242098	6.16046	45.0788	ANAPC15;ANAPC16;CDC16;UBE2E1;ANAPC4;BUB3;ANAPC11
Turquoise	Reactome_2016.286	Inactivation of APC/C via direct inhibition of the APC/C complex Homo sapiens R-HSA-141430	7/20	0.000663853	0.00242098	6.16046	45.0788	ANAPC15;ANAPC16;CDC16;UBE2E1;ANAPC4;BUB3;ANAPC11
Turquoise	DisGeNET.54	Reticulocytopenia	7/13	2.43327e-05	0.00242831	13.3527	141.855	RPS26;RPS17;RPS19;RPL35A;RPL15;FANCE;RPS24
Turquoise	Reactome_2016.287	mRNA decay by 5' to 3' exoribonuclease Homo sapiens R-HSA-430039	6/15	0.000721259	0.00262116	7.62414	55.157	LSM7;LSM6;LSM1;LSM5;LSM4;LSM3
Turquoise	GO_Biological_Process_2018.174	protein lipoylation (GO:0009249)	5/8	0.000154357	0.0026631	19.0547	167.229	GCSH;POP5;GLRX5;NDUFAB1;LIAS
Turquoise	GO_Biological_Process_2018.175	positive regulation of peptidase activity (GO:0010952)	6/12	0.000164551	0.00282275	11.4381	99.6519	PRELID1;NDUFA13;PINK1;DDRGK1;PSME1;PSME2
Turquoise	GO_Biological_Process_2018.176	RNA processing (GO:0006396)	31/193	0.000170225	0.0029035	2.20449	19.1314	TSEN34;DDX25;GEMIN2;SUPT4H1;SNRPD2;SNRPD1;MAGOH;ZMAT5;SNRPD3;BCAS2;ZRSR2;NCBP2;LSM1;ZCRB1;MAGOHB;LSM5;LSM4;LSM3;MRPL44;SMU1;KIN;LSM7;LSM6;SNRPG;LUC7L3;RP9;PPIG;SNRPF;SNRNP25;AURKAIP1;PRMT9
Turquoise	BioCarta_2016.1	Basic Mechanisms of SUMOylation Homo sapiens h sumoPathway	5/6	1.89908e-05	0.00292459	57.1704	621.531	SUMO1;SUMO3;SUMO2;UBA2;SAE1
Turquoise	Reactome_2016.288	Association of TriC/CCT with target proteins during biosynthesis Homo sapiens R-HSA-390471	10/39	0.000820832	0.00297267	3.94906	28.0588	CCT3;NOP56;CCT6A;CCT2;TCP1;FBXO6;CCT8;CCT7;CCT5;CCT4
Turquoise	GO_Biological_Process_2018.177	nucleic acid metabolic process (GO:0090304)	17/80	0.000180545	0.00306213	3.0981	26.7042	WTAP;NCBP2;DDX1;LSM1;GTF2F1;GTF2F2;POLR2D;POLR2F;POLR2G;POLR2H;POLR2I;HNRNPA1;POLR2J;RBMX;POLR2K;RAN;POLR2L
Turquoise	GO_Biological_Process_2018.178	positive regulation of intrinsic apoptotic signaling pathway (GO:2001244)	10/33	0.00018661	0.00314721	4.98088	42.7683	BCAP31;FIS1;UBB;RPS7;BAD;DDIT3;RPS3;RACK1;BAX;SOD1
Turquoise	Reactome_2016.289	Signaling by PDGF Homo sapiens R-HSA-186797	47/364	0.000906201	0.00327047	1.71082	11.9865	PSMD10;PSMD12;PSMD14;PSMD13;ARAF;PEBP1;PHB;ARRB2;PSMA7;PSMB10;PSMD8;PSMB6;PSMD9;PSMB7;PPP2CB;PSMD6;PSMB4;PSMD7;PSMB5;PSMD4;PSMB2;UBB;PSMB3;PSMB1;RPS27A;HRAS;BAD;PSMB8;RBX1;PSMA5;PSMA6;PSMA3;PSMC5;PSMA4;PSMC6;PSMA1;PSMC3;PSMA2;PSMC4;PSMC1;PSMC2;AKT1S1;PSME1;PSME2;LAMTOR2;UBA52;LAMTOR3
Turquoise	DisGeNET.55	Babinski Reflex	27/145	3.37345e-05	0.00330537	2.63568	27.1396	NDUFB9;NDUFA11;NDUFB3;TREM2;HSPD1;AP4S1;NDUFV2;NDUFV1;CCT5;NOP56;TIMMDC1;GLRX5;NDUFA1;PYCR2;SDHD;DPM3;TYROBP;NDUFS6;NDUFAF5;NDUFS4;SDHAF1;NDUFAF2;NDUFS3;NDUFAF3;NDUFS2;TMEM126B;FTL
Turquoise	Reactome_2016.290	Mitotic Spindle Checkpoint Homo sapiens R-HSA-69618	7/21	0.000926933	0.00333376	5.72011	39.9471	ANAPC15;ANAPC16;CDC16;UBE2E1;ANAPC4;BUB3;ANAPC11
Turquoise	GO_Biological_Process_2018.179	rRNA modification (GO:0000154)	8/22	0.000201138	0.00337328	6.54134	55.6768	NOP56;TRMT112;MRPL1;TSR3;NHP2;BUD23;MRM2;NOP10
Turquoise	Reactome_2016.291	RNA Polymerase III Transcription Initiation From Type 2 Promoter Homo sapiens R-HSA-76066	8/27	0.000970423	0.00347818	4.81863	33.4306	CRCP;POLR1C;POLR1D;POLR2F;POLR3H;POLR2H;POLR2K;POLR2L
Turquoise	Reactome_2016.292	TP53 Regulates Transcription of DNA Repair Genes Homo sapiens R-HSA-6796648	13/61	0.000978743	0.00349599	3.10426	21.5102	SUPT4H1;GTF2F1;GTF2F2;GTF2H5;POLR2D;POLR2F;TCEA1;POLR2G;POLR2H;POLR2I;POLR2J;POLR2K;POLR2L
Turquoise	Reactome_2016.293	Translesion synthesis by REV1 Homo sapiens R-HSA-110312	6/16	0.00107565	0.00382902	6.86136	46.8962	PCNA;UBB;RFC2;RPA3;RPS27A;UBA52
Turquoise	DisGeNET.56	Hepatocellular necrosis	9/23	4.06899e-05	0.00391568	7.3636	74.4425	NDUFA9;SURF1;NDUFS8;NDUFS7;NDUFA12;NDUFA2;NDUFS4;NDUFS3;NDUFAF2
Turquoise	Reactome_2016.294	RNA Polymerase III Transcription Initiation From Type 1 Promoter Homo sapiens R-HSA-76061	8/28	0.00126354	0.00448256	4.57745	30.5491	CRCP;POLR1C;POLR1D;POLR2F;POLR3H;POLR2H;POLR2K;POLR2L
Turquoise	Reactome_2016.295	tRNA processing Homo sapiens R-HSA-72306	18/103	0.00140631	0.00497214	2.42992	15.9567	TSEN34;POP5;TYW5;METTL1;RPP30;DDX1;URM1;RTCB;ZBTB8OS;HSD17B10;OSGEP;QTRT1;TRMT112;RPP21;TRMT12;NUP43;RPP38;RAN
Turquoise	GO_Biological_Process_2018.180	iron-sulfur cluster assembly (GO:0016226)	7/18	0.000314612	0.00521805	7.28133	58.7179	NFU1;ISCA2;NFS1;GLRX3;BOLA2;ISCU;CIAO1
Turquoise	GO_Biological_Process_2018.181	regulation of peptidase activity (GO:0052547)	7/18	0.000314612	0.00521805	7.28133	58.7179	CST3;CSTB;NDUFA13;PINK1;PSMA3;A2ML1;PSMB8
Turquoise	GO_Biological_Process_2018.182	protein alkylation (GO:0008213)	9/29	0.000320073	0.00526035	5.15284	41.4647	EEF1A1;KIN;METTL22;PRMT1;ETFB;SNRPD3;RPS2;LCMT1;EEF1AKMT1
Turquoise	GO_Biological_Process_2018.183	mitochondrial respiratory chain complex III assembly (GO:0034551)	5/9	0.000324172	0.00526035	14.2903	114.811	UQCC3;UQCRB;UQCC2;UQCR10;SLC25A33
Turquoise	GO_Biological_Process_2018.184	maturation of LSU-rRNA from tricistronic rRNA transcript (SSU-rRNA, 5.8S rRNA, LSU-rRNA) (GO:0000463)	5/9	0.000324172	0.00526035	14.2903	114.811	RPL7L1;PES1;RPL35;RPF2;RPL7
Turquoise	GO_Biological_Process_2018.185	respiratory chain complex III assembly (GO:0017062)	5/9	0.000324172	0.00526035	14.2903	114.811	UQCRB;UQCC3;UQCC2;UQCR10;SLC25A33
Turquoise	Reactome_2016.296	Cooperation of PDCL (PhLP1) and TRiC/CCT in G-protein beta folding Homo sapiens R-HSA-6814122	10/42	0.00152172	0.00536199	3.57825	23.2154	CCT3;CCT6A;CCT2;GNG10;TCP1;CCT8;CCT7;CCT5;CCT4;GNG13
Turquoise	Reactome_2016.297	Translesion synthesis by POLK Homo sapiens R-HSA-5655862	6/17	0.00154968	0.00542386	6.23726	40.3532	PCNA;UBB;RFC2;RPA3;RPS27A;UBA52
Turquoise	Reactome_2016.298	Translesion synthesis by POLI Homo sapiens R-HSA-5656121	6/17	0.00154968	0.00542386	6.23726	40.3532	PCNA;UBB;RFC2;RPA3;RPS27A;UBA52
Turquoise	GO_Biological_Process_2018.186	regulation of translational initiation (GO:0006446)	14/62	0.000339049	0.00546481	3.34514	26.7255	EIF4A2;CDC123;NPM1;NCBP2;DDX1;EIF1;POLR2D;EIF4H;EIF3H;POLR2G;EIF3E;PAIP2;EIF1B;PAIP1
Turquoise	GO_Biological_Process_2018.187	positive regulation of DNA biosynthetic process (GO:2000573)	13/55	0.000340413	0.00546481	3.54888	28.3391	CCT3;CCT2;HSP90AA1;RFC2;PTGES3;CCT6A;RGCC;TCP1;CCT8;CCT7;HNRNPA1;CCT5;CCT4
Turquoise	GO_Biological_Process_2018.188	transmembrane transport (GO:0055085)	50/378	0.000362735	0.00579218	1.76129	13.9527	TUSC3;PSMD8;PSMD9;PSMD6;PSMD7;PSMD4;ATP6V1E1;ATP6V1G1;ATP6V0B;RALBP1;TSC22D3;PSMA5;PSMA6;PSMA3;PSMA4;PSMA1;PSMA2;PSME1;PSME2;UBA52;PSMD10;PSMD12;PSMD14;PSMD13;DERL1;RNF5;PSMA7;PSMB10;PSMB6;PSMB7;PSMB4;PSMB5;PSMB2;UBB;PDZD11;PSMB3;PSMB1;ATP6V1H;RPS27A;ATP6V1D;ATP6V1C2;ATP6V1F;EIF2S2;PSMB8;PSMC5;PSMC6;PSMC3;PSMC4;PSMC1;PSMC2
Turquoise	Reactome_2016.299	Gap-filling DNA repair synthesis and ligation in GG-NER Homo sapiens R-HSA-5696397	7/23	0.00169392	0.00589703	5.00455	31.9326	POLD4;PCNA;UBB;RFC2;RPA3;RPS27A;UBA52
Turquoise	Reactome_2016.300	Fc epsilon receptor (FCERI) signaling Homo sapiens R-HSA-2454202	49/395	0.00169617	0.00589703	1.63359	10.4213	UBE2D2;ARAF;PEBP1;ARRB2;PSMD8;PSMD9;PSMD6;PSMD7;PSMD4;HRAS;SKP1;RBX1;PSMA5;PSMA6;PSMA3;PSMA4;PSMA1;PSMA2;AKT1S1;PSME1;PSME2;UBA52;PSMD10;PSMD12;PSMD14;PSMD13;PHB;PSMA7;PSMB10;PSMB6;PSMB7;PPP2CB;PSMB4;PSMB5;PSMB2;UBB;PSMB3;PSMB1;RPS27A;BAD;PSMB8;PSMC5;PSMC6;PSMC3;PSMC4;PSMC1;PSMC2;LAMTOR2;LAMTOR3
Turquoise	GO_Biological_Process_2018.189	positive regulation of protein localization to nucleus (GO:1900182)	11/42	0.000373527	0.00593295	4.0658	32.0895	CCT3;CCT6A;CCT2;PINX1;TCP1;PARK7;CCT8;CCT7;CDK5RAP3;CCT5;CCT4
Turquoise	DisGeNET.57	Infratentorial atrophy	29/167	6.68385e-05	0.00631917	2.42104	23.2741	NDUFB9;RNASEH2A;BEAN1;PCNA;NDUFA11;NDUFB3;WDR45;MFF;TXN2;RNASEH1;ZNHIT3;NDUFV2;NDUFV1;BCAP31;NOP56;TIMMDC1;NDUFA1;SUMF1;NDUFS6;PTRH2;NDUFAF5;NDUFS4;NDUFAF2;NDUFS3;NDUFAF3;NDUFS2;MAGED2;STUB1;TMEM126B
Turquoise	Reactome_2016.301	ER to Golgi Anterograde Transport Homo sapiens R-HSA-199977	21/131	0.00183578	0.0063606	2.19174	13.8086	DCTN6;TRAPPC3;RAB1A;DYNC1I2;MCFD2;TMED9;SEC13;TRAPPC2L;TRAPPC4;TRAPPC5;DCTN3;DYNLL1;BET1L;COPZ1;PPP6C;TRAPPC6A;TRAPPC6B;TMED3;SEC22A;COPE;ARF5
Turquoise	Reactome_2016.302	Formation of Incision Complex in GG-NER Homo sapiens R-HSA-5696395	10/43	0.00184171	0.0063606	3.46963	21.8485	SUMO1;UBB;CETN2;SUMO3;RPA3;SUMO2;RPS27A;UBA52;GTF2H5;RBX1
Turquoise	GO_Biological_Process_2018.190	iron ion homeostasis (GO:0055072)	14/63	0.000404002	0.00638324	3.27669	25.6044	ATP6V1G1;NDFIP1;NEDD8;SOD1;TMEM199;UBB;MT-RNR2;RPS27A;B2M;UBA52;ISCU;HMOX2;SKP1;FTL
Turquoise	GO_Biological_Process_2018.191	chromosome organization (GO:0051276)	13/56	0.00041101	0.00642632	3.46616	27.0253	HDAC2;CENPV;CETN2;GPS1;RBX1;COPS4;COPS3;COPS6;COPS5;UBB;RPS27A;COPS8;UBA52
Turquoise	GO_Biological_Process_2018.192	cellular iron ion homeostasis (GO:0006879)	13/56	0.00041101	0.00642632	3.46616	27.0253	ATP6V1G1;NDFIP1;NEDD8;SOD1;TMEM199;UBB;MT-RNR2;RPS27A;UBA52;ISCU;HMOX2;SKP1;FTL
Turquoise	GO_Biological_Process_2018.193	fibroblast growth factor receptor signaling pathway (GO:0008543)	16/78	0.000421997	0.00655515	2.9612	23.01	NCBP2;GTF2F1;GTF2F2;FIBP;UBB;POLR2D;POLR2F;POLR2G;POLR2H;RPS27A;POLR2I;HNRNPA1;UBA52;POLR2J;POLR2K;POLR2L
Turquoise	GO_Biological_Process_2018.194	regulation of autophagy (GO:0010506)	31/203	0.000423617	0.00655515	2.07518	16.1173	NPRL2;PRKAG1;HTRA2;SNX32;HMGB1;ATG101;RUVBL1;ATP6V1H;ATP6V1E1;WASHC1;ATP6V1D;SNX5;RAB8A;ATP6V1C2;ATP6V1G1;ATP6V0B;BAD;MT3;EEF1A1;TMEM59;RRAGA;PINK1;HAX1;CDK5;RRAGB;RHEB;LAMTOR2;LAMTOR1;LAMTOR4;LAMTOR3;LAMTOR5
Turquoise	GO_Biological_Process_2018.195	transcription initiation from RNA polymerase II promoter (GO:0006367)	26/160	0.000457437	0.00704218	2.23165	17.1611	GTF2A2;GTF2B;TAF9;AKR1B1;GTF2E2;MED30;MED31;POLR2D;POLR2F;POLR2G;POLR2H;POLR2I;POLR2J;POLR2K;NR2C2AP;POLR2L;TAF10;TAF11;GTF2F1;GTF2F2;MED6;GTF2H5;MED7;NR2F6;CDK4;BAX
Turquoise	GO_Biological_Process_2018.196	maturation of 5.8S rRNA from tricistronic rRNA transcript (SSU-rRNA, 5.8S rRNA, LSU-rRNA) (GO:0000466)	7/19	0.000463602	0.00707589	6.67419	51.2343	ABT1;EXOSC7;EXOSC9;PES1;RPSA;RPS21;EXOSC2
Turquoise	GO_Biological_Process_2018.197	purine nucleotide catabolic process (GO:0006195)	6/14	0.000464341	0.00707589	8.57763	65.8324	NT5C;HINT1;GPX1;NUDT1;DNPH1;ITPA
Turquoise	Reactome_2016.303	Cytosolic sensors of pathogen-associated DNA Homo sapiens R-HSA-1834949	13/66	0.00209167	0.00720005	2.81064	17.341	CRCP;HMGB1;S100B;UBB;POLR1C;POLR1D;POLR2F;POLR3H;POLR2H;RPS27A;UBA52;POLR2K;POLR2L
Turquoise	Reactome_2016.304	Oxygen-dependent proline hydroxylation of Hypoxia-inducible Factor Alpha Homo sapiens R-HSA-1234176	6/18	0.00216721	0.00743552	5.71717	35.071	EGLN2;UBB;UBE2D2;RPS27A;UBA52;RBX1
Turquoise	Reactome_2016.305	Post-Elongation Processing of Intronless pre-mRNA Homo sapiens R-HSA-112297	7/24	0.00222678	0.00758997	4.70991	28.7644	LSM10;SLBP;NCBP2;SNRPG;SNRPE;SNRPD3;SNRPF
Turquoise	Reactome_2016.306	Processing of Capped Intronless Pre-mRNA Homo sapiens R-HSA-75067	7/24	0.00222678	0.00758997	4.70991	28.7644	LSM10;SLBP;NCBP2;SNRPG;SNRPE;SNRPD3;SNRPF
Turquoise	Reactome_2016.307	Vesicle-mediated transport Homo sapiens R-HSA-5653656	58/492	0.00225495	0.00766094	1.54293	9.40356	SCOC;MCFD2;CLTB;PRKAG1;CLTA;USE1;PPP6C;YWHAQ;TMED3;RAB8A;HSP90AA1;TMED9;SEC13;TRAPPC2L;VPS37D;DYNLL1;COPZ1;BET1L;TRAPPC6A;TRAPPC6B;CHMP4B;NAA38;CHMP6;VPS25;UBA52;SEC22A;CHMP7;VPS28;ARF5;FTL;CHMP5;DCTN6;RAB1A;DYNC1I2;RAB5C;TSG101;DCTN3;ARL1;BLOC1S4;ARFRP1;BLOC1S6;SNX2;UBB;BLOC1S1;BNIP1;CLVS2;AP4S1;RPS27A;SNX5;TRAPPC3;TRAPPC4;TRAPPC5;M6PR;ASPSCR1;SNF8;CHMP2A;RAB9A;COPE
Turquoise	DisGeNET.58	Hypertrophic Cardiomyopathy	47/328	8.26956e-05	0.00768356	1.93385	18.1788	NDUFB9;COX7B;HDAC2;NDUFA11;NDUFB11;NDUFB3;HCCS;LIAS;PEPD;HSD17B10;TMEM70;HSPD1;MRPL3;COX14;NDUFV2;HRAS;NDUFV1;COA6;ATPAF2;TSFM;SURF1;TIMMDC1;PET100;MRPS22;NDUFA1;ALG1;SDHD;TBCA;ATP5F1E;NME1;MRPL44;COX6B1;RIT1;SCO2;NDUFS6;BOLA3;NDUFAF5;SDHAF1;NDUFS4;NDUFAF2;NDUFS3;NDUFAF3;NDUFS2;SUCLG1;TMEM126B;SLC25A4;COX20
Turquoise	DisGeNET.59	MITOCHONDRIAL COMPLEX III DEFICIENCY (disorder)	6/11	8.8312e-05	0.00806633	13.7264	128.131	UQCRB;UQCC3;UQCRQ;UQCC2;CYC1;UQCRC2
Turquoise	GO_Biological_Process_2018.198	respiratory chain complex IV assembly (GO:0008535)	8/25	0.000546718	0.00828913	5.38611	40.4582	COA3;SURF1;PET100;SCO2;COX17;COX14;COA6;COX20
Turquoise	GO_Biological_Process_2018.199	SRP-dependent cotranslational protein targeting to membrane, translocation (GO:0006616)	4/6	0.000553733	0.0083533	22.8527	171.369	SRP19;ZFAND2B;SEC61B;SRP9
Turquoise	Reactome_2016.308	Synthesis, secretion, and inactivation of Glucose-dependent Insulinotropic Polypeptide (GIP) Homo sapiens R-HSA-400511	5/13	0.00251717	0.00852404	7.14358	42.7516	SPCS3;SPCS2;SPCS1;SEC11A;SEC11C
Turquoise	GO_Biological_Process_2018.200	peptide metabolic process (GO:0006518)	19/104	0.00059993	0.0089506	2.56652	19.0402	GSTM3;HSP90AA1;GPX1;GSTO1;GSTP1;SOD1;EEF1E1-BLOC1S5;EEF1G;IMMP1L;SPCS3;SPCS2;NAT8;DNPEP;SPCS1;ETHE1;LTA4H;GSTT2B;SEC11A;SEC11C
Turquoise	GO_Biological_Process_2018.201	negative regulation of autophagosome assembly (GO:1902902)	5/10	0.000605254	0.0089506	11.4316	84.7065	PINK1;FEZ1;PHF23;FEZ2;CHMP4B
Turquoise	GO_Biological_Process_2018.202	mitochondrial respiratory chain complex III biogenesis (GO:0097033)	5/10	0.000605254	0.0089506	11.4316	84.7065	UQCRB;UQCC3;UQCC2;UQCR10;SLC25A33
Turquoise	GO_Biological_Process_2018.203	chaperone-mediated protein transport (GO:0072321)	5/10	0.000605254	0.0089506	11.4316	84.7065	TIMM8B;TOR1A;TIMM9;TIMM13;TIMM10
Turquoise	GO_Biological_Process_2018.204	purine nucleotide metabolic process (GO:0006163)	7/20	0.000663853	0.00972141	6.16046	45.0788	NT5C;GPX1;GUK1;NUDT1;HPRT1;DNPH1;ITPA
Turquoise	GO_Biological_Process_2018.205	mitochondrial respiratory chain complex IV assembly (GO:0033617)	7/20	0.000663853	0.00972141	6.16046	45.0788	COA3;SURF1;PET100;SCO2;COX17;COX14;COX20
Turquoise	Reactome_2016.309	Translesion Synthesis by POLH Homo sapiens R-HSA-110320	6/19	0.00295349	0.00981049	5.2771	30.7379	PCNA;UBB;RFC2;RPA3;RPS27A;UBA52
Turquoise	Reactome_2016.310	Phosphorylation of the APC/C Homo sapiens R-HSA-176412	6/19	0.00295349	0.00981049	5.2771	30.7379	ANAPC15;ANAPC16;CDC16;UBE2E1;ANAPC4;ANAPC11
Turquoise	Reactome_2016.311	Conversion from APC/C:Cdc20 to APC/C:Cdh1 in late anaphase Homo sapiens R-HSA-176407	6/19	0.00295349	0.00981049	5.2771	30.7379	ANAPC15;ANAPC16;CDC16;UBE2E1;ANAPC4;ANAPC11
Turquoise	Reactome_2016.312	Constitutive Signaling by Ligand-Responsive EGFR Cancer Variants Homo sapiens R-HSA-1236382	6/19	0.00295349	0.00981049	5.2771	30.7379	HSP90AA1;UBB;CDC37;RPS27A;HRAS;UBA52
Turquoise	Reactome_2016.313	Signaling by Ligand-Responsive EGFR Variants in Cancer Homo sapiens R-HSA-5637815	6/19	0.00295349	0.00981049	5.2771	30.7379	HSP90AA1;UBB;CDC37;RPS27A;HRAS;UBA52
Turquoise	Reactome_2016.314	Signaling by EGFR in Cancer Homo sapiens R-HSA-1643713	6/19	0.00295349	0.00981049	5.2771	30.7379	HSP90AA1;UBB;CDC37;RPS27A;HRAS;UBA52
Turquoise	GO_Biological_Process_2018.206	RNA metabolic process (GO:0016070)	29/191	0.000701939	0.0102292	2.05966	14.9566	EIF4A2;EIF4A1;RNASEH2C;RNASEH2A;PCNA;DDX25;DDX1;EXOSC7;RNASEH1;PPP1R8;POLR2D;POLR2F;POLR2G;POLR2H;POLR2I;HNRNPA1;POLR2J;POLR2K;POLR2L;WTAP;NCBP2;LSM1;GTF2F1;GTF2F2;DDX50;MRPL44;LSM7;SNRPG;RBMX
Turquoise	GO_Biological_Process_2018.207	positive regulation of TOR signaling (GO:0032008)	9/32	0.00071887	0.0103106	4.48	32.4254	SEC13;RRAGA;RRAGB;RHEB;LAMTOR2;LAMTOR1;LAMTOR4;LAMTOR3;LAMTOR5
Turquoise	GO_Biological_Process_2018.208	positive regulation of telomere maintenance via telomerase (GO:0032212)	9/32	0.00071887	0.0103106	4.48	32.4254	CCT3;CCT6A;CCT2;TCP1;CCT8;CCT7;HNRNPA1;CCT5;CCT4
Turquoise	GO_Biological_Process_2018.209	global genome nucleotide-excision repair (GO:0070911)	9/32	0.00071887	0.0103106	4.48	32.4254	SUMO1;UBB;CETN2;SUMO3;SUMO2;RPS27A;UBA52;GTF2H5;RBX1
Turquoise	GO_Biological_Process_2018.210	establishment of protein localization to endoplasmic reticulum (GO:0072599)	6/15	0.000721259	0.0103106	7.62414	55.157	SPCS3;SPCS2;SPCS1;PMM1;SEC61G;SRP14
Turquoise	Reactome_2016.315	Dual Incision in GG-NER Homo sapiens R-HSA-5696400	9/39	0.00325377	0.0107736	3.43335	19.666	POLD4;PCNA;UBB;RFC2;RPA3;RPS27A;UBA52;GTF2H5;RBX1
Turquoise	DisGeNET.60	Dystonia	38/251	0.000122101	0.0109667	2.05861	18.5494	TSEN34;GCDH;CSTB;RNASEH2C;ECHS1;RNASEH2A;NDUFA12;HTRA2;WDR45;PTS;TXN2;SCP2;AUH;SPR;BCAP31;NDUFA9;TSFM;SURF1;TOR1A;NDUFA2;DNAJC12;ALG1;SDHD;PINK1;SCNM1;NDUFS8;SUCLA2;NDUFS7;PRKRA;UQCRQ;SDHAF1;NDUFS4;NDUFAF2;NDUFS3;HPRT1;MMADHC;FTL;COX20
Turquoise	DisGeNET.61	Abnormal pattern of respiration	9/26	0.000124604	0.0109979	6.06315	54.51	NDUFA9;SURF1;NDUFS8;NDUFS7;NDUFA12;NDUFA2;NDUFS4;NDUFS3;NDUFAF2
Turquoise	DisGeNET.62	Necrotizing encephalopathy, infantile subacute, of Leigh	7/16	0.000130612	0.0109979	8.90037	79.5985	NDUFA9;SURF1;NDUFS8;SCO2;NDUFS4;NDUFAF5;NDUFV1
Turquoise	DisGeNET.63	Leigh Syndrome Due To Mitochondrial Complex II Deficiency	7/16	0.000130612	0.0109979	8.90037	79.5985	NDUFA9;SURF1;NDUFS8;SCO2;NDUFS4;NDUFAF5;NDUFV1
Turquoise	DisGeNET.64	Leigh Syndrome due to Mitochondrial Complex V Deficiency	7/16	0.000130612	0.0109979	8.90037	79.5985	NDUFA9;SURF1;NDUFS8;SCO2;NDUFS4;NDUFAF5;NDUFV1
Turquoise	GO_Biological_Process_2018.211	regulation of proteasomal protein catabolic process (GO:0061136)	10/39	0.000820832	0.0116784	3.94906	28.0588	GABARAPL2;PINK1;GPX1;PSMD14;UBB;DDRGK1;ARAF;PSME1;PSME2;COMMD1
Turquoise	Reactome_2016.316	trans-Golgi Network Vesicle Budding Homo sapiens R-HSA-199992	13/70	0.0035957	0.0118307	2.61283	14.705	RAB5C;CLTB;M6PR;CLTA;BLOC1S4;BLOC1S6;SNX2;BLOC1S1;CLVS2;CHMP2A;AP4S1;SNX5;FTL
Turquoise	Reactome_2016.317	Clathrin derived vesicle budding Homo sapiens R-HSA-421837	13/70	0.0035957	0.0118307	2.61283	14.705	RAB5C;CLTB;M6PR;CLTA;BLOC1S4;BLOC1S6;SNX2;BLOC1S1;CLVS2;CHMP2A;AP4S1;SNX5;FTL
Turquoise	GO_Biological_Process_2018.212	cellular response to oxidative stress (GO:0034599)	20/115	0.000837392	0.0118578	2.41742	17.1279	GPX1;GSTP1;TXNL1;NUDT2;HTRA2;CYBA;PYCR2;PARK7;TXN;MT3;TXN2;SOD1;PRDX3;PRDX2;PRDX5;PINK1;PRDX1;CYCS;ROMO1;P4HB
Turquoise	Reactome_2016.318	Attenuation phase Homo sapiens R-HSA-3371568	7/26	0.00367071	0.0120017	4.21367	23.6276	HSP90AA1;DNAJB6;UBB;HSBP1;MRPL18;PTGES3;FKBP4
Turquoise	Reactome_2016.319	Insulin receptor recycling Homo sapiens R-HSA-77387	7/26	0.00367071	0.0120017	4.21367	23.6276	ATP6V1G1;ATP6V0B;ATP6V1H;ATP6V1E1;ATP6V1D;ATP6V1F;ATP6V1C2
Turquoise	GO_Biological_Process_2018.213	interleukin-12-mediated signaling pathway (GO:0035722)	11/46	0.000863363	0.0120289	3.60036	25.3993	CDC42;GSTO1;RPLP0;BOLA2;TCP1;AIP;TALDO1;PSME2;P4HB;PPIA;SOD1
Turquoise	GO_Biological_Process_2018.214	protein methylation (GO:0006479)	11/46	0.000863363	0.0120289	3.60036	25.3993	EEF1A1;TRMT112;KIN;METTL22;PRMT1;NTMT1;ETFB;SNRPD3;RPS2;LCMT1;EEF1AKMT1
Turquoise	GO_Biological_Process_2018.215	cellular response to interleukin-12 (GO:0071349)	11/46	0.000863363	0.0120289	3.60036	25.3993	CDC42;GSTO1;RPLP0;BOLA2;TCP1;AIP;TALDO1;PSME2;P4HB;PPIA;SOD1
Turquoise	GO_Biological_Process_2018.216	positive regulation of protein ubiquitination (GO:0031398)	16/83	0.000865504	0.0120289	2.73946	19.3193	PSMD10;NDFIP1;CENPX;PEF1;PHF23;MAGEF1;DERL1;ARRB2;COMMD1;PINK1;UBB;PIN1;STUB1;RPS2;CDK5RAP3;CENPS
Turquoise	Reactome_2016.320	Mitochondrial iron-sulfur cluster biogenesis Homo sapiens R-HSA-1362409	4/9	0.0038165	0.0124394	9.13959	50.8931	NFS1;LYRM4;FDXR;ISCU
Turquoise	Reactome_2016.321	Axon guidance Homo sapiens R-HSA-422475	59/515	0.0039331	0.0127452	1.49293	8.26836	ARAF;CLTB;CLTA;PEBP1;TREM2;ARRB2;PSMD8;PSMD9;PSMD6;PSMD7;PSMD4;HRAS;PSENEN;HSP90AA1;RBX1;PSMA5;PSMA6;MYL6;PSMA3;PSMA4;TYROBP;PSMA1;PSMA2;PSME1;PSME2;PFN1;MYL9;UBA52;PSMD10;PSMD12;PSMD14;PSMD13;PHB;PSMA7;PSMB10;MYL12B;PSMB6;CDC42;PSMB7;PPP2CB;PSMB4;PSMB5;PSMB2;UBB;PSMB3;PSMB1;AP2S1;RPS27A;ARPC4;PSMB8;PSMC5;PSMC6;PSMC3;CDK5;PSMC4;PSMC1;PSMC2;LAMTOR2;LAMTOR3
Turquoise	Reactome_2016.322	Synthesis, secretion, and inactivation of Glucagon-like Peptide-1 (GLP-1) Homo sapiens R-HSA-381771	6/20	0.00393477	0.0127452	4.8999	27.1352	SPCS3;SPCS2;SPCS1;SEC11A;GNG13;SEC11C
Turquoise	DisGeNET.65	Erythroid hypoplasia	5/8	0.000154357	0.0127974	19.0547	167.229	RPS14;RPS17;G6PC3;RPS19;RPL35A
Turquoise	GO_Biological_Process_2018.217	mitochondrial respiratory chain complex IV biogenesis (GO:0097034)	7/21	0.000926933	0.0128233	5.72011	39.9471	COA3;SURF1;PET100;SCO2;COX17;COX14;COX20
Turquoise	Reactome_2016.323	Signaling by Interleukins Homo sapiens R-HSA-449147	47/392	0.00405292	0.0130873	1.56954	8.64551	PSMD10;PSMD12;PSMD14;PSMD13;ARAF;PEBP1;PHB;ARRB2;PSMA7;PSMB10;PSMD8;PSMB6;PSMD9;PSMB7;PPP2CB;PSMD6;PSMB4;PSMD7;PSMB5;PSMD4;PSMB2;UBB;PSMB3;PSMB1;RPS27A;HRAS;SKP1;IL18;PSMB8;RBX1;PSMA5;PSMA6;PSMA3;PSMC5;PSMA4;PSMC6;PSMA1;PSMC3;PSMA2;PSMC4;PSMC1;PSMC2;PSME1;PSME2;LAMTOR2;UBA52;LAMTOR3
Turquoise	Reactome_2016.324	Signaling by FGFR in disease Homo sapiens R-HSA-1226099	12/63	0.00408058	0.0131359	2.69479	14.8254	NCBP2;POLR2D;POLR2F;POLR2G;POLR2H;GTF2F1;POLR2I;HRAS;GTF2F2;POLR2J;POLR2K;POLR2L
Turquoise	Reactome_2016.325	Cellular response to heat stress Homo sapiens R-HSA-3371556	16/96	0.00411988	0.0132216	2.29267	12.5912	HSP90AA1;RPS19BP1;HSBP1;MRPL18;PTGES3;HSPA14;EEF1A1;DNAJC2;DNAJC7;DNAJB6;UBB;RPA3;AKT1S1;BAG1;NUP43;FKBP4
Turquoise	GO_Biological_Process_2018.218	transcription from RNA polymerase II promoter (GO:0006366)	59/485	0.000990307	0.0136372	1.60074	11.0731	GTF2B;AKR1B1;PHAX;ARRB2;LSM10;SNAPC5;SNAPC2;MAGOH;ELOB;ELOC;SNRPD3;NCBP2;SSU72;GTF2F1;GTF2F2;MED6;THOC7;MED7;SARNP;DDIT3;SNRPG;SRSF3;SNRPE;SNRPF;ATF4;SLBP;GTF2A2;ELOF1;RBM8A;TAF9;SUPT4H1;WDR61;GTF2E2;MED30;MED31;POLR2D;POLR2F;POLR2G;POLR2H;POLR2I;POLR2J;POLR2K;NR2C2AP;POLR2L;BTF3;CHTOP;TAF10;TAF11;UPF3B;PBX4;MAGOHB;GTF2H5;USF1;NR2F6;COPS5;CDK4;TCEA1;BAX;RBMX
Turquoise	GO_Biological_Process_2018.219	negative regulation of protein ubiquitination involved in ubiquitin-dependent protein catabolic process (GO:2000059)	5/11	0.00103604	0.0142018	9.52581	65.4647	RPL5;PDCL3;RPS7;RPL23;RPL11
Turquoise	DisGeNET.66	Growth retardation	28/168	0.000182845	0.0147067	2.30246	19.817	RPL5;NDUFB9;MOCS2;NDUFA11;NDUFB3;HTRA2;LIAS;PIGY;SPR;PHKG2;NDUFV2;NDUFV1;TIMMDC1;UQCC3;NAA10;MRPS22;NDUFA1;G6PC3;NDUFS6;NDUFAF5;NDUFS4;NHP2;NDUFAF2;NDUFS3;NDUFAF3;NDUFS2;SUCLG1;TMEM126B
Turquoise	DisGeNET.67	Poor growth	28/168	0.000182845	0.0147067	2.30246	19.817	RPL5;NDUFB9;MOCS2;NDUFA11;NDUFB3;HTRA2;LIAS;PIGY;SPR;PHKG2;NDUFV2;NDUFV1;TIMMDC1;UQCC3;NAA10;MRPS22;NDUFA1;G6PC3;NDUFS6;NDUFAF5;NDUFS4;NHP2;NDUFAF2;NDUFS3;NDUFAF3;NDUFS2;SUCLG1;TMEM126B
Turquoise	Reactome_2016.326	HSF1-dependent transactivation Homo sapiens R-HSA-3371571	8/34	0.00478583	0.0152649	3.51996	18.804	HSP90AA1;DNAJB6;UBB;HSBP1;MRPL18;PTGES3;AKT1S1;FKBP4
Turquoise	Reactome_2016.327	ROS, RNS production in response to bacteria Homo sapiens R-HSA-1222556	8/34	0.00478583	0.0152649	3.51996	18.804	ATP6V1G1;ATP6V0B;ATP6V1H;CYBA;ATP6V1E1;ATP6V1D;ATP6V1F;ATP6V1C2
Turquoise	DisGeNET.68	Radial club hand	14/59	0.000194832	0.0154404	3.56873	30.489	RPL5;RPS7;RBM8A;RPL11;RPL35A;FANCE;RPS26;RPS17;RPS19;PUF60;RPS29;RPL26;RPL15;RPS24
Turquoise	DisGeNET.69	Growth delay	28/169	0.00020261	0.0156817	2.28601	19.4407	RPL5;NDUFB9;MOCS2;NDUFA11;NDUFB3;HTRA2;LIAS;PIGY;SPR;PHKG2;NDUFV2;NDUFV1;TIMMDC1;UQCC3;NAA10;MRPS22;NDUFA1;G6PC3;NDUFS6;NDUFAF5;NDUFS4;NHP2;NDUFAF2;NDUFS3;NDUFAF3;NDUFS2;SUCLG1;TMEM126B
Turquoise	DisGeNET.70	Leigh Syndrome due to Mitochondrial Complex III Deficiency	7/17	0.000206606	0.0156817	8.0099	67.9616	NDUFA9;SURF1;NDUFS8;SCO2;NDUFS4;NDUFAF5;NDUFV1
Turquoise	DisGeNET.71	Leigh Syndrome due to Mitochondrial Complex IV Deficiency	7/17	0.000206606	0.0156817	8.0099	67.9616	NDUFA9;SURF1;NDUFS8;SCO2;NDUFS4;NDUFAF5;NDUFV1
Turquoise	GO_Biological_Process_2018.220	positive regulation of telomere maintenance via telomere lengthening (GO:1904358)	9/34	0.00116077	0.0158393	4.12115	27.8535	CCT3;CCT6A;CCT2;TCP1;CCT8;CCT7;HNRNPA1;CCT5;CCT4
Turquoise	GO_Biological_Process_2018.221	cellular lipid biosynthetic process (GO:0097384)	4/7	0.00120935	0.0163535	15.2343	102.339	PEX7;ERG28;DHRS7B;ACAT1
Turquoise	GO_Biological_Process_2018.222	outer mitochondrial membrane organization (GO:0007008)	4/7	0.00120935	0.0163535	15.2343	102.339	HSP90AA1;SAMM50;TOMM7;TOMM22
Turquoise	Reactome_2016.328	Signalling by NGF Homo sapiens R-HSA-166520	52/450	0.00549214	0.0174643	1.50565	7.83607	ARAF;CLTA;PEBP1;ARRB2;PSMD8;PSMD9;PSMD6;PSMD7;PSMD4;HRAS;PSENEN;RBX1;PSMA5;PSMA6;PSMA3;PSMA4;PSMA1;PSMA2;AKT1S1;PSME1;PSME2;UBA52;PSMD10;HDAC2;PSMD12;PSMD14;PSMD13;PHB;PSMA7;PSMB10;PSMB6;PSMB7;PPP2CB;PSMB4;PSMB5;PSMB2;UBB;PSMB3;PSMB1;AP2S1;RPS27A;BAD;PSMB8;PSMC5;RIT1;PSMC6;PSMC3;PSMC4;PSMC1;PSMC2;LAMTOR2;LAMTOR3
Turquoise	GO_Biological_Process_2018.223	nuclear import (GO:0051170)	14/71	0.00141796	0.0190884	2.81558	18.4661	RPAIN;RANBP1;GEMIN2;HIKESHI;NUTF2;SNRPD2;SNRPD1;SNRPG;SNRPE;SNRPD3;SNRPF;GEMIN7;HNRNPA1;RAN
Turquoise	Reactome_2016.329	Iron uptake and transport Homo sapiens R-HSA-917937	9/43	0.00647251	0.0205192	3.02877	15.2656	ATP6V1G1;ATP6V0B;ATP6V1H;ATP6V1E1;ATP6V1D;HMOX2;ATP6V1F;ATP6V1C2;FTL
Turquoise	GO_Biological_Process_2018.224	mRNA cis splicing, via spliceosome (GO:0045292)	6/17	0.00154968	0.0205846	6.23726	40.3532	RNF113A;NCBP2;WBP4;CWC15;SNRPC;DCPS
Turquoise	GO_Biological_Process_2018.225	maturation of 5.8S rRNA (GO:0000460)	6/17	0.00154968	0.0205846	6.23726	40.3532	NSA2;PES1;MAK16;C1D;RPF1;MPHOSPH6
Turquoise	GO_Biological_Process_2018.226	nucleotide catabolic process (GO:0009166)	6/17	0.00154968	0.0205846	6.23726	40.3532	NT5C;GPX1;NUDT1;DNPH1;NUDT3;ITPA
Turquoise	DisGeNET.72	Ubiquinone dehydrogenase deficiency	6/13	0.000284738	0.0213119	9.80354	80.0355	UQCRB;UQCC3;UQCC2;UQCRQ;CYC1;UQCRC2
Turquoise	GO_Biological_Process_2018.227	regulation of proteasomal ubiquitin-dependent protein catabolic process (GO:0032434)	16/88	0.00165479	0.0216475	2.54853	16.321	PSMD10;UBXN1;RPL11;TAF9;ARAF;PARK7;COMMD1;RBX1;RNF114;SUMO1;DDRGK1;SUMO2;RACK1;STUB1;NOP53;RNF166
Turquoise	GO_Biological_Process_2018.228	rRNA 3'-end processing (GO:0031125)	5/12	0.00165854	0.0216475	8.16453	52.2679	EXOSC7;EXOSC9;RPSA;RPS21;EXOSC2
Turquoise	GO_Biological_Process_2018.229	exit from mitosis (GO:0010458)	5/12	0.00165854	0.0216475	8.16453	52.2679	UBE2S;PPP2R2D;CHMP2A;CHMP4B;CHMP7
Turquoise	GO_Biological_Process_2018.230	tRNA 5'-leader removal (GO:0001682)	5/12	0.00165854	0.0216475	8.16453	52.2679	POP5;SSB;RPP30;RPP21;RPP38
Turquoise	GO_Biological_Process_2018.231	nucleotide-excision repair, DNA gap filling (GO:0006297)	7/23	0.00169392	0.0220136	5.00455	31.9326	POLD4;PCNA;UBB;RFC2;RPA3;RPS27A;UBA52
Turquoise	DisGeNET.73	Generalized hypotonia	76/633	0.000300803	0.0222059	1.58284	12.8353	NDUFA11;NDUFA12;HIKESHI;TXN2;GCSH;TUBA1A;MPC1;CHMP1A;ATP6V1E1;NANS;ATPAF2;TSFM;SSR4;GPX4;MRPS22;AMT;ALG1;COX6B1;NDUFS8;NDUFS7;SCO2;NDUFS6;ETHE1;PTRH2;BOLA3;TMEM216;NDUFS4;SBDS;NDUFS3;NDUFS2;HPRT1;TMEM126B;SLC25A4;MMADHC;RNASEH2C;NDUFB9;GCDH;FH;ECHS1;NAXE;NDUFB3;HTRA2;PDHB;LIAS;HSD17B10;TMEM70;HSPD1;EBP;PHKG2;NDN;PCBD1;COX14;NDUFV2;DCPS;NDUFV1;TOE1;NDUFA9;PEX16;EIF2B3;SURF1;TIMMDC1;TOR1A;PET100;UQ…
Turquoise	Reactome_2016.330	Transferrin endocytosis and recycling Homo sapiens R-HSA-917977	7/29	0.00704105	0.022254	3.63849	18.0323	ATP6V1G1;ATP6V0B;ATP6V1H;ATP6V1E1;ATP6V1D;ATP6V1F;ATP6V1C2
Turquoise	KEGG_2019_Human.17	RNA degradation	15/79	0.00145515	0.0227688	2.68739	17.5558	LSM1;WDR61;LSM5;LSM4;LSM3;HSPD1;EXOSC7;LSM7;LSM6;EXOSC9;C1D;CNOT8;EXOSC2;DCPS;MPHOSPH6
Turquoise	DisGeNET.74	Hereditary Diffuse Gastric Cancer	42/300	0.000318881	0.0232223	1.87857	15.1238	FKBP2;UBXN1;ECHS1;MRPS11;GSTP1;URM1;HIKESHI;PHB;MRPL13;HSPD1;RPS15;PTPA;PRDX5;RPS19;ARL6IP5;IDH3B;RPL13;RPL15;FSD1;RPL18;CCT7;HRAS;NDUFV1;SNX5;ABT1;CDKN2D;NOP56;NPM1;RPS6;NDUFA2;M6PR;CNPY2;RPS26;EEF1A1;CDK4;APEX1;SERBP1;SUCLG1;NAXD;RPS21;PPIA;PLPP1
Turquoise	GO_Biological_Process_2018.232	secondary alcohol biosynthetic process (GO:1902653)	9/36	0.00179958	0.0232859	3.81546	24.1145	IDI1;EBP;ERG28;CNBP;PMVK;CYP51A1;MSMO1;ACAT1;FDFT1
Turquoise	DisGeNET.75	Very poor growth	28/174	0.000332793	0.0239123	2.20711	17.6745	RPL5;NDUFB9;MOCS2;NDUFA11;NDUFB3;HTRA2;LIAS;PIGY;SPR;PHKG2;NDUFV2;NDUFV1;TIMMDC1;UQCC3;NAA10;MRPS22;NDUFA1;G6PC3;NDUFS6;NDUFAF5;NDUFS4;NHP2;NDUFAF2;NDUFS3;NDUFAF3;NDUFS2;SUCLG1;TMEM126B
Turquoise	GO_Biological_Process_2018.233	ubiquitin-dependent ERAD pathway (GO:0030433)	12/58	0.00198078	0.0255206	2.98851	18.6013	PSMC5;PSMC6;PSMC3;PSMC4;PSMC1;JKAMP;PSMC2;DERL1;TMUB1;FBXO6;AUP1;SEC61B
Turquoise	Reactome_2016.331	Incretin synthesis, secretion, and inactivation Homo sapiens R-HSA-400508	6/23	0.00831805	0.0260532	4.03455	19.3228	SPCS3;SPCS2;SPCS1;SEC11A;GNG13;SEC11C
Turquoise	Reactome_2016.332	BBSome-mediated cargo-targeting to cilium Homo sapiens R-HSA-5620922	6/23	0.00831805	0.0260532	4.03455	19.3228	CCT3;CCT2;TCP1;CCT8;CCT5;CCT4
Turquoise	Reactome_2016.333	Cholesterol biosynthesis Homo sapiens R-HSA-191273	6/23	0.00831805	0.0260532	4.03455	19.3228	IDI1;EBP;CYP51A1;PMVK;MSMO1;FDFT1
Turquoise	GO_Biological_Process_2018.234	'de novo' posttranslational protein folding (GO:0051084)	8/30	0.00205866	0.0264107	4.16086	25.7378	CHCHD4;CCT2;DNAJC7;PTGES3;BAG1;SELENOF;HSPA14;HSPE1
Turquoise	KEGG_2019_Human.18	DNA replication	9/36	0.00179958	0.0265937	3.81546	24.1145	POLE4;RNASEH2C;POLD4;RNASEH2A;PCNA;RNASEH1;RFC2;RPA3;SSBP1
Turquoise	Reactome_2016.334	RNA Polymerase I Promoter Escape Homo sapiens R-HSA-73772	7/30	0.00855743	0.0265988	3.4801	16.5686	POLR1C;POLR1D;POLR2F;POLR2H;POLR2K;GTF2H5;POLR2L
Turquoise	Reactome_2016.335	Termination of translesion DNA synthesis Homo sapiens R-HSA-5656169	7/30	0.00855743	0.0265988	3.4801	16.5686	POLD4;PCNA;UBB;RFC2;RPA3;RPS27A;UBA52
Turquoise	Reactome_2016.336	Assembly of the primary cilium Homo sapiens R-HSA-5617833	25/187	0.00856874	0.0265988	1.7711	8.42977	DYNC1I2;ARL3;CETN2;SSNA1;DCTN3;TUBA1A;TCTEX1D2;PDE6D;CCT8;RAB8A;CCT5;CCT4;IQCB1;CCT3;CCT2;HSP90AA1;DYNLL1;IFT20;IFT22;TMEM216;TCP1;IFT27;DYNLRB1;B9D2;CLUAP1
Turquoise	Reactome_2016.337	SUMO is proteolytically processed Homo sapiens R-HSA-3065679	3/6	0.00869567	0.0269127	11.4186	54.1806	SUMO1;SUMO3;SUMO2
Turquoise	DisGeNET.76	Cerebellar degeneration	30/193	0.000383357	0.0271831	2.11883	16.6679	CSTB;NDUFB9;PCNA;RNASEH2A;BEAN1;NDUFA11;NDUFB3;WDR45;MFF;TXN2;PRDX2;RNASEH1;ZNHIT3;NDUFV2;NDUFV1;BCAP31;NOP56;TIMMDC1;NDUFA1;SUMF1;NDUFS6;PTRH2;NDUFAF5;NDUFS4;NDUFAF2;NDUFS3;NDUFAF3;NDUFS2;STUB1;TMEM126B
Turquoise	WikiPathways_2019_Human.13	mRNA Processing WP411	21/126	0.00111098	0.0274326	2.29673	15.6236	U2AF1L5;RBM17;SF3B5;NCBP2;PRMT1;DDX1;SNU13;LSM7;PHF5A;SNRPD2;SNRPD1;TRA2B;SNRPG;SRSF3;SNRPE;SNRPB2;SNRPD3;SNRPF;DNAJC8;HNRNPA1;RBMX
Turquoise	GO_Biological_Process_2018.235	viral life cycle (GO:0019058)	18/107	0.00218749	0.027944	2.3202	14.2112	RAB1A;TSG101;CD81;VPS37D;UBB;CHMP2A;MVB12A;CHMP4B;NUP43;CHMP6;RPS27A;PPIA;UBA52;CHMP7;PPID;VPS28;RAN;CHMP5
Turquoise	GO_Biological_Process_2018.236	nucleotide-excision repair, DNA incision, 5'-to lesion (GO:0006296)	9/37	0.00221035	0.0279977	3.67899	22.4956	POLD4;PCNA;UBB;RFC2;RPA3;RPS27A;UBA52;GTF2H5;RBX1
Turquoise	GO_Biological_Process_2018.237	organic cyclic compound biosynthetic process (GO:1901362)	9/37	0.00221035	0.0279977	3.67899	22.4956	MOCS2;NFS1;SCP2;MT-RNR1;CYP51A1;FDXR;PYCR2;LIAS;FDFT1
Turquoise	Reactome_2016.338	Synthesis, secretion, and deacylation of Ghrelin Homo sapiens R-HSA-422085	5/17	0.00922396	0.0284633	4.76135	22.3115	SPCS3;SPCS2;SPCS1;SEC11A;SEC11C
Turquoise	GO_Biological_Process_2018.238	late endosome to vacuole transport via multivesicular body sorting pathway (GO:0032511)	4/8	0.00226435	0.0285612	11.4251	69.5843	TMEM50A;SNF8;VPS25;VPS28
Turquoise	Reactome_2016.339	DNA Damage Bypass Homo sapiens R-HSA-73893	9/46	0.0101751	0.0313056	2.78274	12.7667	POLD4;PCNA;UBB;UBE2B;RFC2;RPA3;RPS27A;UBA52;RBX1
Turquoise	GO_Biological_Process_2018.239	negative regulation of ubiquitin-protein transferase activity (GO:0051444)	5/13	0.00251717	0.0316173	7.14358	42.7516	RPL5;RPS7;RPL23;RPL11;PARK7
Turquoise	Reactome_2016.340	Asparagine N-linked glycosylation Homo sapiens R-HSA-446203	32/259	0.0103857	0.0318597	1.61923	7.39554	DCTN6;DYNC1I2;RAB1A;MCFD2;CMAS;TUSC3;RPN1;DCTN3;FUOM;PPP6C;TMED3;NANS;TRAPPC3;TMED9;SEC13;TRAPPC2L;PMM1;TRAPPC4;TRAPPC5;ALG1;DYNLL1;COPZ1;BET1L;DPM2;DPM3;TRAPPC6A;NAGK;TRAPPC6B;DAD1;SEC22A;ARF5;COPE
Turquoise	GO_Biological_Process_2018.240	cofactor biosynthetic process (GO:0051188)	8/31	0.0025813	0.0322877	3.97974	23.7171	NFU1;ISCA2;MOCS2;NFS1;PPCS;ISCU;MMADHC;CIAO1
Turquoise	DisGeNET.77	Elevated urinary dopamine	6/14	0.000464341	0.0324978	8.57763	65.8324	FH;SDHAF2;SDHC;SDHD;SDHB;NME1
Turquoise	GO_Biological_Process_2018.241	positive regulation of cysteine-type endopeptidase activity involved in apoptotic process (GO:0043280)	18/109	0.00269789	0.033606	2.26896	13.4215	BCAP31;MTCH1;BEX3;FIS1;NDUFA13;BAD;PDCD5;HTRA2;HMGB1;HSPE1;HSPD1;FAM162A;ARL6IP5;RACK1;RPS3;CYCS;BAX;PDCD2
Turquoise	KEGG_2019_Human.19	Peroxisome	15/83	0.00242388	0.0339344	2.52876	15.2292	PEX16;PHYH;ECI2;PEX11B;DHRS4;SOD1;PEX7;HMGCL;PRDX5;SLC25A17;SCP2;PRDX1;PMVK;NUDT19;ACAA1
Turquoise	Reactome_2016.341	RNA Polymerase I Transcription Initiation Homo sapiens R-HSA-73762	9/47	0.0117076	0.0358094	2.70936	12.0499	HDAC2;RBBP4;POLR1C;POLR1D;POLR2F;POLR2H;POLR2K;GTF2H5;POLR2L
Turquoise	DisGeNET.78	Intermittent migraine headaches	18/95	0.000526385	0.0363678	2.68355	20.2594	RPL5;RPS7;RPL11;PEX11B;AIP;RPL35A;RPS26;RPS17;RPS28;RPS27;RPS19;RPS29;RPL35;RPL27;RPL26;RPL15;RPL18;RPS24
Turquoise	GO_Biological_Process_2018.242	error-free translesion synthesis (GO:0070987)	6/19	0.00295349	0.0364872	5.2771	30.7379	PCNA;UBB;RFC2;RPA3;RPS27A;UBA52
Turquoise	GO_Biological_Process_2018.243	negative regulation of proteolysis involved in cellular protein catabolic process (GO:1903051)	6/19	0.00295349	0.0364872	5.2771	30.7379	RPL5;GABARAPL2;PDCL3;RPS7;RPL23;RPL11
Turquoise	GO_Biological_Process_2018.244	cellular transition metal ion homeostasis (GO:0046916)	16/93	0.00297518	0.0366044	2.38239	13.8594	ATP6V1G1;SLC30A9;NDFIP1;NEDD8;MT3;SOD1;TMEM199;UBB;MT-RNR2;SLC39A7;RPS27A;UBA52;ISCU;HMOX2;SKP1;FTL
Turquoise	Reactome_2016.342	RNA Polymerase I Transcription Termination Homo sapiens R-HSA-73863	7/32	0.012288	0.0373656	3.20134	14.0831	POLR1C;POLR1D;POLR2F;POLR2H;POLR2K;GTF2H5;POLR2L
Turquoise	Reactome_2016.343	TGF-beta receptor signaling activates SMADs Homo sapiens R-HSA-2173789	7/32	0.012288	0.0373656	3.20134	14.0831	UBB;STRAP;NEDD8;STUB1;RPS27A;UBA52;PPP1CA
Turquoise	Reactome_2016.344	mRNA decay by 3' to 5' exoribonuclease Homo sapiens R-HSA-429958	4/12	0.012325	0.0373691	5.71131	25.1076	EXOSC7;EXOSC9;EXOSC2;DCPS
Turquoise	GO_Biological_Process_2018.245	RNA export from nucleus (GO:0006405)	19/119	0.00309236	0.0378908	2.17976	12.5964	SLBP;RANBP1;CHTOP;NPM1;SSB;RBM8A;NCBP2;DDX25;UPF3B;PHAX;RPSA;MAGOHB;THOC7;SARNP;MAGOH;SRSF3;NUP43;HNRNPA1;RAN
Turquoise	Reactome_2016.345	ATF4 activates genes Homo sapiens R-HSA-380994	6/25	0.0127069	0.0383043	3.60947	15.7575	EXOSC7;EXOSC9;NFYC;DDIT3;EXOSC2;ATF4
Turquoise	Reactome_2016.346	Glyoxylate metabolism and glycine degradation Homo sapiens R-HSA-389661	6/25	0.0127069	0.0383043	3.60947	15.7575	GCSH;GRHPR;NDUFAB1;AMT;PDHB;LIAS
Turquoise	GO_Biological_Process_2018.246	negative regulation of protein modification by small protein conjugation or removal (GO:1903321)	10/46	0.00313889	0.0383046	3.17998	18.329	RPL5;UBXN1;SVBP;RPL11;PINX1;RPS3;PARK7;ARRB2;GTPBP4;VPS28
Turquoise	GO_Biological_Process_2018.247	cellular response to amino acid stimulus (GO:0071230)	8/32	0.00320211	0.0389179	3.81371	21.9057	RRAGA;RRAGB;SESN1;LAMTOR2;LAMTOR1;LAMTOR4;LAMTOR3;LAMTOR5
Turquoise	DisGeNET.79	Mitochondrial Encephalomyopathies	11/44	0.000576267	0.0393102	3.81898	28.4855	RNASEH1;SUCLA2;NDUFB11;SCO2;NDUFS4;NDUFA1;NDUFS2;SUCLG1;MFF;NDUFV2;TMEM70
Turquoise	GO_Biological_Process_2018.248	regulation of alternative mRNA splicing, via spliceosome (GO:0000381)	9/39	0.00325377	0.0393864	3.43335	19.666	SMU1;RBM8A;WTAP;TRA2B;MAGOH;SAP18;HNRNPA1;NSRP1;RBMX
Turquoise	GO_Biological_Process_2018.249	cellular response to fibroblast growth factor stimulus (GO:0044344)	16/94	0.00332314	0.0400645	2.35172	13.4209	NCBP2;GTF2F1;GTF2F2;FIBP;UBB;POLR2D;POLR2F;POLR2G;POLR2H;RPS27A;POLR2I;HNRNPA1;UBA52;POLR2J;POLR2K;POLR2L
Turquoise	DisGeNET.80	Death in early childhood	19/104	0.00059993	0.0402681	2.56652	19.0402	PEX16;ISCA2;NAXE;MRPS22;PEX11B;AMT;HTRA2;ALG1;TMEM70;PQBP1;GCSH;AIMP1;DPM2;EMG1;SCO2;SLC25A19;BOLA3;TFAM;ITPA
Turquoise	DisGeNET.81	Complex V deficiency	5/10	0.000605254	0.0402681	11.4316	84.7065	ATPAF2;TIMM23;ATP5F1E;TMEM70;TIMM50
Turquoise	GO_Biological_Process_2018.250	positive regulation of translation (GO:0045727)	14/78	0.00355472	0.0426851	2.50666	14.1363	RPL5;COA3;RPS9;CDC123;NPM1;IMP3;UQCC2;PYM1;UPF3B;RPS4X;POLR2D;POLR2G;EIF3E;RPL26
Turquoise	Reactome_2016.347	Phosphate bond hydrolysis by NUDT proteins Homo sapiens R-HSA-2393930	3/7	0.0143104	0.0430138	8.56351	36.3672	NUDT9;NUDT1;ADPRM
Turquoise	GO_Biological_Process_2018.251	hydrogen peroxide catabolic process (GO:0042744)	5/14	0.00365763	0.0434	6.3495	35.6267	PRDX3;PRDX2;PRDX5;GPX1;PRDX1
Turquoise	GO_Biological_Process_2018.252	nucleoside triphosphate metabolic process (GO:0009141)	5/14	0.00365763	0.0434	6.3495	35.6267	NME2;CMPK1;SUCLG1;DCTPP1;ITPA
Turquoise	GO_Biological_Process_2018.253	purine-containing compound catabolic process (GO:0072523)	5/14	0.00365763	0.0434	6.3495	35.6267	NT5C;GPX1;NUDT1;DNPH1;ITPA
Turquoise	Reactome_2016.348	Gastrin-CREB signalling pathway via PKC and MAPK Homo sapiens R-HSA-881907	48/432	0.0147214	0.0441219	1.43794	6.06588	PSMD10;PSMD12;PSMD14;PSMD13;ARAF;PEBP1;PHB;ARRB2;PSMA7;PSMB10;PSMD8;PSMB6;PSMD9;PSMB7;PPP2CB;PSMD6;PSMB4;GNG10;PSMD7;PSMB5;PSMD4;PSMB2;UBB;PSMB3;PSMB1;RPS27A;TAC1;HRAS;PSMB8;RBX1;GNG13;PSMA5;PSMA6;PSMA3;PSMC5;PSMA4;PSMC6;PSMA1;PSMC3;PSMA2;PSMC4;PSMC1;PSMC2;PSME1;PSME2;LAMTOR2;UBA52;LAMTOR3
Turquoise	Reactome_2016.349	tRNA processing in the nucleus Homo sapiens R-HSA-6784531	10/57	0.0148682	0.0444342	2.43427	10.2447	TSEN34;POP5;RPP30;DDX1;RTCB;RPP21;ZBTB8OS;NUP43;RPP38;RAN
Turquoise	Reactome_2016.350	PCNA-Dependent Long Patch Base Excision Repair Homo sapiens R-HSA-5651801	5/19	0.0151469	0.0451377	4.08071	17.098	POLD4;PCNA;RFC2;RPA3;APEX1
Turquoise	Reactome_2016.351	Regulation of Hypoxia-inducible Factor (HIF) by oxygen Homo sapiens R-HSA-1234174	6/26	0.0154178	0.0455545	3.42881	14.3058	EGLN2;UBB;UBE2D2;RPS27A;UBA52;RBX1
Turquoise	Reactome_2016.352	Cellular response to hypoxia Homo sapiens R-HSA-2262749	6/26	0.0154178	0.0455545	3.42881	14.3058	EGLN2;UBB;UBE2D2;RPS27A;UBA52;RBX1
Turquoise	Reactome_2016.353	Downregulation of TGF-beta receptor signaling Homo sapiens R-HSA-2173788	6/26	0.0154178	0.0455545	3.42881	14.3058	UBB;STRAP;STUB1;RPS27A;UBA52;PPP1CA
Turquoise	GO_Biological_Process_2018.254	nucleotide-excision repair, DNA incision (GO:0033683)	9/40	0.00390335	0.0455948	3.32242	18.4259	POLD4;PCNA;UBB;RFC2;RPA3;RPS27A;UBA52;GTF2H5;RBX1
Turquoise	GO_Biological_Process_2018.255	regulation of protein dephosphorylation (GO:0035304)	9/40	0.00390335	0.0455948	3.32242	18.4259	PTPA;PPP1R14B;PPP1R11;CNEP1R1;ENSA;PPP1R8;TIPRL;PIN1;CALM2
Turquoise	GO_Biological_Process_2018.256	sterol biosynthetic process (GO:0016126)	9/40	0.00390335	0.0455948	3.32242	18.4259	IDI1;EBP;ERG28;CNBP;PMVK;CYP51A1;MSMO1;ACAT1;FDFT1
Turquoise	GO_Biological_Process_2018.257	regulation of release of cytochrome c from mitochondria (GO:0090199)	9/40	0.00390335	0.0455948	3.32242	18.4259	PSMD10;PRELID1;PINK1;GPX1;FAM162A;BAD;PDCD5;BAX;MFF
Turquoise	GO_Biological_Process_2018.258	regulation of autophagosome assembly (GO:2000785)	8/33	0.00393287	0.0456069	3.66096	20.2758	IFT20;PINK1;NPRL2;PHF23;FEZ1;FEZ2;CHMP4B;RAB33A
Turquoise	GO_Biological_Process_2018.259	error-prone translesion synthesis (GO:0042276)	6/20	0.00393477	0.0456069	4.8999	27.1352	PCNA;UBB;RFC2;RPA3;RPS27A;UBA52
Turquoise	DisGeNET.82	Failure to gain weight	65/539	0.000710172	0.0462722	1.58684	11.5046	RPL5;ISCA2;NDUFA11;NDUFA12;HIKESHI;MSMO1;NFU1;MRPL3;RPS19;AUH;BANF1;ATP6V1E1;HRAS;ATPAF2;SSR4;TALDO1;NME1;COX6B1;NDUFS8;NDUFS7;NDUFS6;ETHE1;PTRH2;TMEM216;NDUFS4;SBDS;NDUFS3;TFAM;NDUFS2;SUCLG1;TMEM126B;MMADHC;NDUFB9;GCDH;FH;NDUFB11;NDUFB3;PEX11B;AK2;TMEM70;EBP;ASL;COX14;NDUFV2;NDUFV1;NDUFA9;PEX16;BCAP31;SURF1;TIMMDC1;PET100;NDUFA2;NDUFA1;PYCR2;PSMB8;AIMP1;RIT1;G6PC3;SUCLA2;LYRM4;NDUFAF5;RFXAP;NDUF…
Turquoise	DisGeNET.83	Undergrowth	64/529	0.000715043	0.0462722	1.59244	11.5343	RPL5;NDUFA11;NDUFA12;HIKESHI;MSMO1;NFU1;MRPL3;RPS19;AUH;BANF1;ATP6V1E1;HRAS;ATPAF2;SSR4;TALDO1;NME1;COX6B1;NDUFS8;NDUFS7;NDUFS6;ETHE1;PTRH2;TMEM216;NDUFS4;SBDS;NDUFS3;TFAM;NDUFS2;SUCLG1;TMEM126B;MMADHC;NDUFB9;GCDH;FH;NDUFB11;NDUFB3;PEX11B;AK2;TMEM70;EBP;ASL;COX14;NDUFV2;NDUFV1;NDUFA9;PEX16;BCAP31;SURF1;TIMMDC1;PET100;NDUFA2;NDUFA1;PYCR2;PSMB8;AIMP1;RIT1;G6PC3;SUCLA2;LYRM4;NDUFAF5;RFXAP;NDUFAF2;ND…
Turquoise	DisGeNET.84	3-Methylglutaconic Aciduria	6/15	0.000721259	0.0462722	7.62414	55.157	ATPAF2;AUH;HTRA2;ATP5F1E;TMEM70;TIMM50
Turquoise	GO_Biological_Process_2018.260	protein localization to nucleus (GO:0034504)	16/96	0.00411988	0.0475688	2.29267	12.5912	RPAIN;RANBP1;TOR1A;PINX1;RPL11;ARL2;HIKESHI;NUTF2;RPF2;GPN1;GPN3;ARL2BP;CNEP1R1;NOP53;RAN;SKP1
Turquoise	KEGG_2019_Human.20	Folate biosynthesis	7/26	0.00367071	0.0488204	4.21367	23.6276	CBR1;MOCS2;SPR;AKR1B1;PCBD1;PCBD2;PTS
White	KEGG_2019_Human.1	Glutathione metabolism	4/56	1.06323e-05	0.00085058	34.0154	389.531	GSTK1;NAT8;GSTA4;MGST1
White	GO_Biological_Process_2018.1	glutathione metabolic process (GO:0006749)	4/49	6.21104e-06	0.00290056	39.3205	471.421	GSTK1;NAT8;GSTA4;MGST1
White	GO_Biological_Process_2018.2	glutathione derivative biosynthetic process (GO:1901687)	3/22	2.05953e-05	0.003206	68.4165	738.244	GSTK1;GSTA4;MGST1
White	GO_Biological_Process_2018.3	glutathione derivative metabolic process (GO:1901685)	3/22	2.05953e-05	0.003206	68.4165	738.244	GSTK1;GSTA4;MGST1
White	GO_Biological_Process_2018.4	organonitrogen compound biosynthetic process (GO:1901566)	5/181	7.93253e-05	0.00926123	12.7679	120.554	GSTK1;OAT;GSTA4;MGST1;NMRAL1
White	KEGG_2019_Human.2	Lysosome	4/123	0.000233009	0.00932037	14.8138	123.909	LAPTM4A;CTSL;NPC2;FUCA1
White	Reactome_2016.1	mitochondrial fatty acid beta-oxidation of unsaturated fatty acids Homo sapiens R-HSA-77288	2/6	8.76494e-05	0.00957413	212.202	1982.43	HADHB;ECI1
White	Reactome_2016.2	Glutathione conjugation Homo sapiens R-HSA-156590	3/38	0.000109753	0.00957413	37.1106	338.347	GSTK1;GSTA4;MGST1
White	Reactome_2016.3	Metabolism Homo sapiens R-HSA-1430728	14/1908	0.000134217	0.00957413	3.81352	34.0015	GSTK1;OAT;ECI1;DCXR;GLO1;MGST1;HSD17B12;NMRAL1;HADHB;RAP1A;GNG5;PHKG1;GSTA4;APOE
White	GO_Biological_Process_2018.5	peptide metabolic process (GO:0006518)	4/104	0.000122108	0.0114048	17.6453	158.995	GSTK1;NAT8;GSTA4;MGST1
White	KEGG_2019_Human.3	Metabolism of xenobiotics by cytochrome P450	3/74	0.000792746	0.0211399	18.2609	130.383	GSTK1;GSTA4;MGST1
White	KEGG_2019_Human.4	Chemical carcinogenesis	3/82	0.00106825	0.021365	16.4051	112.239	GSTK1;GSTA4;MGST1
White	GO_Biological_Process_2018.6	negative regulation of hemostasis (GO:1900047)	2/13	0.000450813	0.0313911	77.1373	594.301	SERPINE2;APOE
White	GO_Biological_Process_2018.7	negative regulation of coagulation (GO:0050819)	2/15	0.000604968	0.0313911	65.2635	483.624	SERPINE2;APOE
White	GO_Biological_Process_2018.8	regulation of protein homooligomerization (GO:0032462)	2/15	0.000604968	0.0313911	65.2635	483.624	APOE;RHOC
White	GO_Biological_Process_2018.9	negative regulation of platelet activation (GO:0010544)	2/15	0.000604968	0.0313911	65.2635	483.624	SERPINE2;APOE
White	KEGG_2019_Human.5	Fatty acid elongation	2/27	0.00198475	0.0314036	33.9166	211.038	HADHB;HSD17B12
White	KEGG_2019_Human.6	Drug metabolism	3/108	0.00235527	0.0314036	12.3267	74.5902	GSTK1;GSTA4;MGST1
White	Reactome_2016.4	Mitochondrial Fatty Acid Beta-Oxidation Homo sapiens R-HSA-77289	2/17	0.00078113	0.0417905	56.556	404.645	HADHB;ECI1
Yellow	DisGeNET.1	Autistic Disorder	172/677	2.27186e-38	1.63256e-34	3.75735	325.678	APP;FRMPD4;CTNND2;HDLBP;JMJD1C;CDH9;CDH8;RIMS1;GRIP1;SYNGAP1;OPHN1;EP300;NRCAM;SLC12A6;GTF2I;SCN1A;MEF2A;SRRM2;GUCY1A2;RBFOX1;CDKL5;PRKCB;DYRK1A;TSC2;CASK;TBR1;TSC1;ANK3;MAPK8IP2;FOXP1;CACNB2;CLIP1;SCN8A;WDFY3;ASTN2;CLOCK;ATF6;GRIA1;PCDH10;CHRNA4;ANKRD11;FOXG1;STXBP1;CHRNA7;SLC1A1;PCDH15;SLC1A2;AGAP1;CACNA1A;CACNA1D;CACNA1C;SEZ6L2;NPAS2;ACACA;RAI1;GRIN2A;BRINP1;ZNF827;MAP2;DYM;MPDZ;SCN3A;RAB11FIP…
Yellow	DisGeNET.2	Neurodevelopmental Disorders	84/208	7.27682e-35	2.61456e-31	7.23727	568.891	NCKAP1;SETD5;KDM5B;SETD2;CNTNAP1;TRIO;MYT1L;ZNF292;PTEN;AFF3;ADRA1A;GPHN;ROBO1;PHF8;MECP2;RIMS1;SYNGAP1;KIF5C;EPG5;DLGAP1;RBFOX1;USP7;CDKL5;FBXW7;CACNA2D3;DYRK1A;TSC2;CASK;VPS13B;ANK2;TSC1;TBR1;PPP2R5D;ANK3;ASH1L;ADRA2B;ARID1B;TANC2;HCFC1;FOXP1;SETBP1;SCN8A;WDFY3;ASTN2;SHANK3;SHANK2;KMT2E;KMT2D;SRCAP;KMT2A;FOXG1;STXBP1;ANKRD11;KMT2C;KCNA2;ITPR1;HTT;CACNA1A;ATP1A3;GIGYF2;ADCY5;RAI1;GRIN2A;PTCHD1;H…
Yellow	Reactome_2016.1	Neuronal System Homo sapiens R-HSA-112316	99/301	4.40514e-32	4.88971e-29	5.26003	379.774	KCNG1;KCNG3;GLS;RPS6KA3;GRIP1;RIMS1;PPFIA3;KCNH1;PRKCG;NSF;KCNH5;ACTN2;PRKCB;CACNA2D3;CASK;GABRG3;CACNB1;CACNB2;ADCY9;CACNB4;AKAP9;KCNQ2;KCNQ3;KCNQ5;GRIA1;CHRNA4;STXBP1;CHRNA7;SLC1A1;SLC1A2;CACNA1B;CACNA1A;LIN7A;CACNA1E;GRIN2A;EPB41L1;KCNN2;KCNN3;GRIA3;KCNF1;SYT1;BRAF;GRIN2C;GRIN2B;GNAL;DLG3;DLG4;GNB1;GABRB2;SNAP25;GABRB1;PTPRS;KCNC1;KCNC3;GRIK3;AP2A1;AP2A2;PTPRF;PANX2;NEFL;KCND2;KCND3;ABCC8;PDPK…
Yellow	DisGeNET.3	Intellectual Disability	390/2503	1.48763e-31	3.56337e-28	2.14212	152.054	RB1;NCKAP1;TRIO;FRMPD4;MYT1L;IFT172;XYLT1;DMP1;RBPJ;NDST1;KIAA1109;ZFYVE26;SYNGAP1;AKT3;DIP2B;NUP214;PRKCG;RBFOX1;UNC13A;CACNA2D3;DICER1;SYTL5;GABRG3;HCFC1;BCR;HECW2;MAP1B;SRCAP;NEDD4L;GIGYF2;GRIN2A;RNF213;EPB41L1;CREBBP;HACE1;PRRT2;HOMER1;SETD1B;BRAF;L1CAM;GRIN2B;SETX;DCHS2;AGO1;CDK13;GPI;SETD5;SETD2;KCNC1;KCNC3;TCF20;FMN2;LYST;PHF8;MECP2;MED12;NIPBL;CHL1;NEFL;DLGAP2;APC2;IFT140;KCND3;ASH1L;CIT;…
Yellow	DisGeNET.4	Schizophrenia	321/1923	4.95104e-31	8.89454e-28	2.28567	159.495	ITSN2;APP;MYT1L;TRRAP;ADARB1;GLS;HTR6;SYNGAP1;HERC2;AKT3;FAM53C;ADNP2;PIP4K2C;BSN;SYNPO;SLC12A6;PKNOX2;CALN1;ANKS1B;SOX5;PRKCG;SRRM2;MEF2A;RBFOX1;SFMBT1;DICER1;ANK3;MAPK8IP3;UHMK1;DKK3;EML5;HECW2;KCNQ2;MAP1A;AKAP9;KCNQ3;KCNQ5;TTLL11;KCTD12;NUP98;ASTN2;ZFPM2;CLOCK;ASTN1;STXBP1;TRANK1;PCDH15;AGAP1;TMTC1;KALRN;GSPT1;GIGYF2;SYNGR1;GRIN2A;PCNX1;CHST11;EPB41L1;MAP2;CMYA5;DYM;MAP6;KCNN3;HIVEP2;PPARGC1B;…
Yellow	DisGeNET.5	Mental Retardation	215/1158	1.31388e-26	1.8883e-23	2.5205	150.207	RB1;APP;FRMPD4;MYT1L;IFT172;XYLT1;NDST1;RPS6KA3;ZFYVE26;SYNGAP1;HERC2;OPHN1;HERC1;AKT3;DIP2B;SLC12A6;SCAPER;SCN1A;SOX5;SRRM2;SLC6A17;COG5;DICER1;ANK3;ANK1;HCFC1;BCR;HECW2;KCNQ2;SRCAP;FOXG1;STXBP1;PCDH15;NEDD4L;GRIN2A;RNF213;DYM;HIVEP2;SCN3A;CREBBP;HACE1;PRRT2;IQSEC2;HOMER1;BCL11B;MYO5A;CPLANE1;BRAF;L1CAM;GRIN2B;MED13L;CCDC88C;SCN2A;CDK13;GPI;SETD5;SETD2;C2CD3;KCNC3;SLC7A14;FMN2;VLDLR;LYST;PHF8;ME…
Yellow	DisGeNET.6	Poor school performance	190/985	1.42947e-25	1.71202e-22	2.62276	150.041	RB1;APP;ATP8A2;FRMPD4;MYT1L;ZNF292;IFT172;XYLT1;UBE3B;CELSR2;NDST1;GRIP1;RPS6KA3;ZFYVE26;SYNGAP1;HERC2;OPHN1;HERC1;GNPTAB;AKT3;SACS;EP300;TRAPPC11;DIP2B;SLC12A6;ARID2;SCAPER;SCN1A;GTF2I;SOX5;CDKL5;SLC6A17;COG5;DYRK1A;CASK;TSC2;TBR1;FRMD4A;OCRL;TSC1;ANK3;ANK1;FOXP1;HCFC1;BCR;KAT6B;COL4A1;SCN8A;HECW2;KAT6A;KCNQ2;SPECC1L;TNIK;SNRNP200;KMT2D;CEP104;KMT2A;SRCAP;FOXG1;ANKRD11;STXBP1;CHRNA7;PCDH15;ITPR1…
Yellow	DisGeNET.7	Mental deficiency	195/1032	4.30146e-25	4.41575e-22	2.5586	143.552	RB1;APP;FRMPD4;MYT1L;IFT172;XYLT1;NDST1;RPS6KA3;ZFYVE26;SYNGAP1;HERC2;OPHN1;HERC1;AKT3;DIP2B;SLC12A6;SCAPER;SCN1A;SOX5;PRKCG;SLC6A17;COG5;ANK3;ANK1;HCFC1;BCR;INPP4A;HECW2;KCNQ2;SRCAP;FOXG1;STXBP1;PCDH15;NEDD4L;RNF213;DYM;HIVEP2;CREBBP;HACE1;PRRT2;IQSEC2;BCL11B;MYO5A;CPLANE1;BRAF;L1CAM;GRIN2B;MED13L;CCDC88C;CDK13;GPI;SETD5;SETD2;C2CD3;KCNC3;SLC7A14;FMN2;VLDLR;LYST;PHF8;MECP2;MED12;NIPBL;CHL1;EPG5;…
Yellow	DisGeNET.8	Epilepsy	211/1177	4.42369e-24	3.97358e-21	2.40534	129.347	APP;SLC4A3;RPS6KA3;ZFYVE26;SYNGAP1;OPHN1;AKT3;BSN;SLC12A6;SCN1A;MEF2A;SRRM2;MED1;RBFOX1;ANK2;MAPK8IP3;STX1B;HECW2;KCNQ2;KCNQ3;KCNQ5;PCDH10;FOXG1;STXBP1;NEDD4L;TRPM2;GRIN2A;RNF213;ANKH;SCN3A;CREBBP;PRRT2;EGR3;IQSEC2;BCL11B;INSR;FN1;MYO5A;BRAF;GRIN2C;L1CAM;GRIN2B;AGO2;CCDC88C;ATM;SCN2A;SCN2B;GABRB2;RYR2;GABRB1;SETD2;HIP1;KCNC1;SLC35F1;WASL;VLDLR;LYST;MECP2;MED12;NIPBL;PCLO;IDS;EPG5;SPTAN1;KCND2;IFT…
Yellow	Reactome_2016.2	Transmission across Chemical Synapses Homo sapiens R-HSA-112315	70/211	2.83429e-23	1.57303e-20	5.25549	272.853	GABRB2;SNAP25;GABRB1;GRIK3;AP2A1;AP2A2;GLS;RPS6KA3;GRIP1;RIMS1;NEFL;PPFIA3;PRKCG;NSF;ACTN2;PRKCB;PDPK1;CACNA2D3;CASK;SYN3;GABRG3;SYN2;SYN1;CACNB1;CACNB2;ARHGEF9;ADCY9;CACNB4;DNAJC5;AKAP9;PLCB1;GRIA1;CHRNA4;STXBP1;CHRNA7;SLC1A1;CAMK2A;SLC1A2;CACNA1B;ADCY3;CACNA1A;LIN7A;ADCY1;AKAP5;CACNA1E;CAMKK1;ADCY5;GRIN2A;CACNG8;EPB41L1;MAPK1;SLC17A7;CACNG3;GRIA3;GABBR2;GABBR1;KCNJ6;SYT1;GABRA4;BRAF;AP2B1;GRIN2…
Yellow	DisGeNET.9	Autism Spectrum Disorders	127/572	1.04654e-22	7.50905e-20	3.07295	155.526	TRIO;CTNND2;JMJD1C;CDH8;CMIP;SYNGAP1;HERC2;SLC16A7;RGS6;GTF2I;SCN1A;SOX5;MEF2A;SRRM2;RBFOX1;USP7;CDKL5;PRKCB;DYRK1A;TSC2;CASK;TBR1;TSC1;ANK3;FOXP1;CACNB2;COL4A1;ZNF436;ASTN2;CTTNBP2;ANKRD11;KMT2C;FOXG1;CHRNA7;SLC1A1;ITPR1;PCDH15;CACNA1A;CACNA1D;CACNA1C;SEZ6L2;GIGYF2;RAI1;GRIN2A;DPP6;HIVEP2;MPDZ;KIAA0319;RAB11FIP5;MARK1;SRPK2;PRRT2;L1CAM;GRIN2B;SNAP91;PRRC2A;NBEA;CNOT1;DLG4;CNTN4;SCN2A;SNAP25;RYR2…
Yellow	DisGeNET.10	Dull intelligence	178/947	1.14945e-22	7.50905e-20	2.5249	127.552	RB1;APP;ATP8A2;FRMPD4;MYT1L;IFT172;XYLT1;UBE3B;NDST1;GRIP1;RPS6KA3;ZFYVE26;SYNGAP1;HERC2;OPHN1;HERC1;GNPTAB;AKT3;SACS;EP300;TRAPPC11;DIP2B;SLC12A6;ARID2;SCAPER;SCN1A;GTF2I;SOX5;CDKL5;SLC6A17;COG5;CASK;TSC2;TBR1;FRMD4A;OCRL;TSC1;ANK3;ANK1;FOXP1;HCFC1;BCR;KAT6B;COL4A1;SCN8A;HECW2;KAT6A;KCNQ2;SPECC1L;TNIK;SNRNP200;KMT2D;CEP104;KMT2A;SRCAP;FOXG1;ANKRD11;STXBP1;CHRNA7;PCDH15;ITPR1;NEDD4L;UBR1;PRPF8;RA…
Yellow	DisGeNET.11	Low intelligence	178/947	1.14945e-22	7.50905e-20	2.5249	127.552	RB1;APP;ATP8A2;FRMPD4;MYT1L;IFT172;XYLT1;UBE3B;NDST1;GRIP1;RPS6KA3;ZFYVE26;SYNGAP1;HERC2;OPHN1;HERC1;GNPTAB;AKT3;SACS;EP300;TRAPPC11;DIP2B;SLC12A6;ARID2;SCAPER;SCN1A;GTF2I;SOX5;CDKL5;SLC6A17;COG5;CASK;TSC2;TBR1;FRMD4A;OCRL;TSC1;ANK3;ANK1;FOXP1;HCFC1;BCR;KAT6B;COL4A1;SCN8A;HECW2;KAT6A;KCNQ2;SPECC1L;TNIK;SNRNP200;KMT2D;CEP104;KMT2A;SRCAP;FOXG1;ANKRD11;STXBP1;CHRNA7;PCDH15;ITPR1;NEDD4L;UBR1;PRPF8;RA…
Yellow	Reactome_2016.3	Axon guidance Homo sapiens R-HSA-422475	116/515	2.34567e-21	8.67898e-19	3.1177	148.096	TRIO;ITSN1;PITPNA;ARHGAP39;ARHGAP35;RPS6KA3;SYNGAP1;NRCAM;SH3GL2;EPHB3;SCN1A;EPHA5;EPHA4;EPHA7;EPHA6;ACTN2;PAQR3;ADAM10;FRS2;ANK2;ANK3;ANK1;CACNB1;CACNB2;TIAM1;CACNB4;COL4A1;SCN8A;PSME4;AKAP9;KCNQ2;KCNQ3;SEMA7A;SHC3;ARHGEF28;AGAP2;CACNA1D;RASAL2;CACNA1C;KALRN;RASGRP1;GRIN2A;PLXNA2;ABL2;PIP5K1C;SRGAP3;SRGAP2;SCN3A;MYH10;PLXNA4;SPTBN1;SPTBN2;FN1;BRAF;GRIN2C;L1CAM;GRIN2B;PTK2;DLG3;DLG4;NF1;CNTN1;SCN…
Yellow	Reactome_2016.4	Developmental Biology Homo sapiens R-HSA-1266738	153/786	4.40427e-21	1.22219e-18	2.61623	122.627	TRIO;ITSN1;PITPNA;ARHGAP39;RBPJ;ARHGAP35;YY1;RPS6KA3;SYNGAP1;AKT3;EP300;NRCAM;SH3GL2;EPHB3;SCN1A;MEF2A;EPHA5;EPHA4;MED1;EPHA7;EPHA6;ACTN2;PAQR3;ADAM11;ADAM10;FRS2;ANK2;ANK3;ANK1;CACNB1;STX1B;CACNB2;TIAM1;CACNB4;COL4A1;SCN8A;PSME4;KCNQ2;AKAP9;KCNQ3;KMT2D;SEMA7A;SHC3;KMT2C;ARHGEF28;AGAP2;CACNA1D;CACNA1C;RASAL2;KALRN;RASGRP1;HELZ2;GRIN2A;PLXNA2;ABL2;PIP5K1C;SRGAP3;SRGAP2;SCN3A;MYH10;PLXNA4;SPTBN1;SP…
Yellow	DisGeNET.12	Seizures	202/1174	7.14226e-21	4.27703e-18	2.27467	105.518	APP;DMP1;RPS6KA3;SYNGAP1;OPHN1;AKT3;SLC12A6;SCN1A;ANKS1B;RBFOX1;ANK1;MAPK8IP3;STX1B;MAP1B;HECW2;KCNQ2;KCNQ3;FOXG1;STXBP1;GRIN2A;RNF213;PCNX2;ANKH;HIVEP1;SCN3A;KAT14;SRPK2;CREBBP;PRRT2;EGR3;IQSEC2;HOMER1;BCL11B;INSR;FN1;MYO5A;BRAF;GRIN2C;L1CAM;GRIN2B;CCDC88C;ATM;SCN2A;RYR2;GABRB1;SETD2;HIP1;KCNC1;VLDLR;LYST;MECP2;MED12;NIPBL;PCLO;IDS;EPG5;SPTAN1;KCND2;IFT140;STRADA;SYN3;SYN2;SYN1;CNKSR2;BACE1;ARHG…
Yellow	DisGeNET.13	Epileptic encephalopathy	106/468	8.5318e-20	4.71612e-17	3.12783	137.336	CYFIP2;CELSR3;KIAA1109;SYNGAP1;OPHN1;RUSC2;KIF5C;AKT3;SCN1A;SOX5;SZT2;CDKL5;MAGI2;DYRK1A;TSC2;CASK;TSC1;HCFC1;STX1B;CACNB4;COL4A1;HECW2;SCN8A;KCNQ2;KCNQ3;TBC1D24;KCNQ5;CHRNA4;FOXG1;STXBP1;SLC1A2;NEDD4L;CACNA1A;CACNA1D;GRIN2A;NACC1;PRRT2;IQSEC2;SETD1B;BRAF;GRIN2B;GNAO1;TBCK;SYNJ1;GNAQ;CCDC88C;GNB1;SCN2A;SCN2B;GABRB2;SETD5;GABRB1;KCNC1;PTEN;MTR;PTPN23;VLDLR;RYR3;GPHN;MECP2;MED12;UNC80;PCLO;EPG5;KIF…
Yellow	DisGeNET.14	Genetic Diseases, Inborn	108/507	4.65601e-18	2.38986e-15	2.88878	115.287	ITSN1;XYLT1;UBE3B;ZFYVE26;SYNGAP1;GNPTAB;AKT3;SACS;SBF2;KCNH1;SCN1A;CDKL5;DYRK1A;TSC2;CASK;HCFC1;FOXP1;KAT6B;COL4A1;HECW2;KAT6A;SCN8A;KCNQ2;KCNQ3;TBC1D24;KMT2D;SRCAP;KMT2A;ANKRD11;FOXG1;STXBP1;ITPR1;CACNA1A;CACNA1C;CACNA1E;NALCN;GRIN2A;NACC1;SCN3A;MYH10;SPTBN2;SMAD2;CREBBP;SMAD4;IQSEC2;FN1;BRAF;GRIN2B;SETX;GNAO1;TBCK;SON;GNB1;NF1;ACO2;CDK13;LZTR1;SCN2A;SETD5;SNAP25;RYR2;KCNC3;LRRK2;CHD8;CLTC;PTEN…
Yellow	Reactome_2016.5	Neurotransmitter Receptor Binding And Downstream Transmission In The Postsynaptic Cell Homo sapiens R-HSA-112314	47/142	4.96496e-16	1.10222e-13	5.18088	182.569	GRIA1;GABRB2;GABRB1;CHRNA4;CHRNA7;CAMK2A;GRIK3;ADCY3;AP2A1;ADCY1;AKAP5;AP2A2;CAMKK1;ADCY5;GRIP1;RPS6KA3;GRIN2A;CACNG8;EPB41L1;NEFL;MAPK1;CACNG3;GRIA3;NSF;PRKCG;GABBR2;KCNJ6;GABBR1;ACTN2;PRKCB;PDPK1;GABRA4;BRAF;AP2B1;GRIN2C;GABRG3;GRIN2B;GRIN1;ARHGEF9;ADCY9;GNAL;DLG3;DLG4;CAMK4;AKAP9;GNB1;PLCB1
Yellow	GO_Biological_Process_2018.1	protein phosphorylation (GO:0006468)	98/470	7.44002e-16	2.75281e-12	2.79906	97.5038	APP;MAML1;RPS6KA3;SLK;AKT3;MAP3K9;MAP3K5;EPHB3;PRKCG;EPHA4;CDKL5;PRKCB;DAPK1;PRKCE;DYRK1A;ADAM10;LMTK2;UHMK1;BCR;ERN1;DGKQ;ULK2;TNIK;SIK2;BRSK1;BRSK2;PRKDC;TNKS;NLK;PRKCZ;TTBK1;TTBK2;GRK5;ABL2;MARK4;MARK1;SRPK2;SMAD2;PLK2;INSR;DCLK2;BRAF;EIF2AK4;DCLK1;PTK2;BMP2;STK24;WNK2;WNK3;AAK1;ATM;CDK12;CDK13;MAP3K13;CDK14;GSK3B;SMG1;MAST4;MAST3;LRRK2;MAST2;PKD1;DSTYK;TLK1;ERC1;JAK1;CAMK1D;PDPK1;MINK1;KSR2;L…
Yellow	Reactome_2016.6	L1CAM interactions Homo sapiens R-HSA-373760	36/96	1.63944e-14	3.03296e-12	6.25557	198.563	CNTNAP1;NCAN;AP2A1;AP2A2;EGFR;RPS6KA3;CHL1;MAPK1;NRCAM;SPTAN1;SCN3A;SH3GL2;SPTBN1;SCN1A;SPTBN2;ANK2;ANK3;AP2B1;L1CAM;SPTB;ANK1;DNM1;DNM3;NFASC;DLG3;DLG4;SCN8A;KCNQ2;NUMB;KCNQ3;DCX;CNTN1;ITGA5;SCN2A;ITGA9;SCN2B
Yellow	DisGeNET.15	Attention deficit hyperactivity disorder	87/412	1.50418e-14	7.20603e-12	2.83317	90.174	SETD5;SNAP25;APP;GSK3B;TRIO;DOCK3;TENM4;NCAN;DIRAS2;PTEN;JMJD1C;LAMC2;SLC2A3;ADRA1A;SYNE1;PTPRG;HK1;MECP2;MED12;NIPBL;GRM5;HERC2;OPHN1;SIN3A;SLC12A6;GIT1;GTF2I;PRKCG;PDE4D;VPS13A;VPS13B;TSC2;OCRL;TSC1;ANK3;OPRM1;SYN3;ADRA2B;SORCS2;VWA8;CACNB2;SETBP1;MAP1B;SCN8A;ADAM12;CDH11;TBC1D24;ASTN2;CLOCK;SHANK3;FAN1;NPSR1;KMT2A;NUFIP2;CHRNA4;CHRNA7;LIN7A;SEMA3E;CACNA1C;KALRN;ARNTL;RAI1;GRIN2A;DPP6;ATXN1;PTC…
Yellow	Reactome_2016.7	Signalling by NGF Homo sapiens R-HSA-166520	91/450	5.58021e-14	8.84861e-12	2.68402	81.9082	GSK3B;TRIO;PRDM4;ITSN1;PTEN;ARRB1;AP2A1;AP2A2;CASP9;RPS6KA3;AKAP13;SPRED2;SYNGAP1;RASGEF1A;MCF2L;AKT3;NEFL;PIP4K2B;PIP4K2C;SPTAN1;SH3GL2;JAK1;PRKCG;MEF2A;ARHGEF11;DUSP3;ARHGEF12;ACTN2;PDPK1;PRKCE;ARHGEF17;PAQR3;TSC2;FRS2;PPP2R5D;KSR2;SPTB;DNM1;TIAM2;CNKSR2;DNM3;TIAM1;ARHGEF9;ADCY9;PSME4;AKAP9;KIT;ARHGEF3;RAPGEF2;ARHGEF2;PHLPP2;SHC3;PDE1B;PDE1A;CAMK2A;ITPR1;ADCY3;ADCY1;RASAL2;KALRN;RASGRP1;EGFR;AD…
Yellow	DisGeNET.16	Delayed speech and language development	58/220	2.08454e-14	9.36217e-12	3.75926	118.423	SETD5;SETD2;TRIO;MYT1L;IFT172;PTEN;VLDLR;SOBP;PHF8;AFF2;MECP2;RPS6KA3;NIPBL;SYNGAP1;HERC2;OPHN1;SIN3A;EP300;SCN1A;SOX5;CDKL5;PDE4D;DYRK1A;ARID1A;ARID1B;FOXP1;PACS1;KAT6B;TNIK;ZMYND11;MAPRE2;SHANK3;ATP6V1A;KMT2A;STXBP1;ATP1A3;CBL;NALCN;RAI1;GRIN2A;NSD1;SPTBN2;DYNC1H1;CREBBP;MBD5;BRPF1;IQSEC2;USP9X;KIDINS220;HUWE1;L1CAM;GRIN2B;ASXL1;DLG3;KANSL1;ASXL2;NF1;CDK13
Yellow	DisGeNET.17	Global developmental delay	173/1102	4.33236e-14	1.83131e-11	2.00644	61.7382	RB1;APP;FRMPD4;MYT1L;JMJD1C;UBE3B;CMIP;NDST1;SYNGAP1;HERC2;OPHN1;HERC1;KIF5C;EP300;TRAPPC11;SLC12A6;ARID2;KCNH1;SCN1A;SOX5;SZT2;CDKL5;SLC6A17;VPS33A;DYRK1A;CASK;COG1;TSC2;FRMD4A;OCRL;TSC1;DICER1;ANK1;FOXP1;BCR;PREPL;KAT6B;COL4A1;SCN8A;KAT6A;KCNQ2;SPECC1L;KCNQ3;TBC1D24;FBN2;ATP6V1A;KMT2D;CEP104;MACF1;SRCAP;FOXG1;ANKRD11;STXBP1;CHRNA7;PCDH15;SLC1A2;ITPR1;CACNA1A;NEDD4L;CACNA1D;TNFRSF11A;CACNA1C;NAL…
Yellow	DisGeNET.18	Bipolar Disorder	141/837	4.9741e-14	1.98577e-11	2.16892	66.4383	CHRM2;APP;CTNND2;PREP;ADARB1;DEPTOR;TNR;PIP4K2C;SLC12A6;MAGI2;LMO7;ANK3;MAPK8IP3;UHMK1;BCR;CACNB2;MAU2;ADCY9;SCN8A;KCNQ2;KCNQ3;KCTD12;NUP98;ASTN2;CLOCK;ASTN1;DGKH;GRIA1;KMT2D;CHRNA7;SLC1A1;CACNA1B;SLC1A2;ITPR1;TRANK1;CACNA1A;CACNA1D;CACNA1C;RASAL2;RASGRP1;PRKCZ;NPAS2;TRPM2;GRIN2A;SYNGR1;MAP2;KCNN3;GRIA3;NTNG2;CREBBP;EGR3;HOMER1;CADM2;GRIN2C;GRIN2B;DCLK1;NR4A2;BCL9;PLCXD3;GNAL;DLG2;NR4A3;SYNJ1;NBE…
Yellow	GO_Biological_Process_2018.2	chemical synaptic transmission (GO:0007268)	69/289	1.61459e-14	2.98699e-11	3.30373	104.917	CHRM2;GABRB2;SNAP25;GABRB1;CHRM1;CHRM4;GRIK3;PTEN;CDH8;GRM3;GRM2;HTR6;GRM5;DLGAP1;KIF1B;SLC12A6;BSN;DLGAP2;GRID2;UNC13A;KCND2;MINK1;OPRM1;GABRG3;SYN2;SYN1;CACNB1;CACNB2;CACNB4;AKAP9;KCNQ2;KCNQ3;EXOC4;AMPH;OPRD1;GRIA1;NAPB;CHRNA4;KCNA1;CHRNA7;SLC1A1;SLC1A2;CACNA1B;CACNA1A;NRXN2;AKAP5;CACNA1E;GRIN2A;MAPK1;SLC17A7;TSPOAP1;GRIA3;GABBR2;SLC12A5;HOMER1;SYT1;GABRA4;PCDHB13;GRIN2C;PCDHB11;GRIN2B;DLG2;DLG…
Yellow	DisGeNET.19	Intelligence	56/214	8.2404e-14	3.11661e-11	3.71802	112.013	BMPR2;JMJD1C;DCAF5;AFF3;PTPRF;ZMIZ2;PHACTR3;BSN;ARID2;CALN1;ZNF365;NSF;NCOA2;RBFOX1;GRID2;KCNH5;SFMBT1;DCC;PDE4D;TMOD2;TET2;TBR1;TANC2;FOXP1;SLC22A23;ATXN2L;PITPNM2;EXOC4;TTLL11;FAM193A;SHANK3;KMT2E;KMT2D;LUZP2;PDE1A;AKAP6;PKD1L3;CACNA1E;PPM1E;ATAD2B;SNX29;MAN2A1;ZSWIM6;GPR158;ATF7IP;LINGO1;PTPRN2;SYT1;CADM2;DENND4A;GBF1;PCGF3;POU6F2;SYT7;APBA1;CNTN4
Yellow	DisGeNET.20	Abnormal behavior	79/372	1.81398e-13	6.51761e-11	2.84526	83.4745	CHRM2;APP;GSK3B;SNAP25;SETD2;CHRM4;CTNND2;LRRK2;PTEN;LAMC2;SLC2A3;ADARB1;LDLRAD4;MECP2;MED12;GRM3;GRM2;NIPBL;GRM5;SYNGAP1;ADNP2;NRCAM;DLGAP3;SCN1A;SOX5;SLC6A17;NCOA6;DYRK1A;VPS13A;TSC2;TSC1;ANK3;OPRM1;SYN1;SCN8A;NOS1AP;CLOCK;SHANK3;SHANK2;GRIA1;HDAC4;NLGN3;NUFIP2;CHRNA4;DCTN1;PLPPR4;CHRNA7;SLC1A1;PRICKLE2;HTT;TMTC1;CACNA1C;UBR1;RAI1;GRIN2A;CNR1;NSD1;PLXNA2;MAP6;MAPK1;PCNT;CSMD1;GRIA3;MARK1;NTRK2;…
Yellow	GO_Biological_Process_2018.3	regulation of cation channel activity (GO:2001257)	30/71	5.98166e-14	6.7926e-11	7.61051	231.721	KCNG1;APP;NLGN2;JPH1;JPH4;CACNG8;JPH3;NETO1;PTK2B;CACNG3;HOMER1;ACTN2;DAPK1;PDE4D;MINK1;KCNAB1;ANK2;OPRM1;ANK3;MAPK8IP2;SHISA7;CACNB1;CACNB2;CACNB4;DLG4;SLMAP;SHANK3;CNIH3;SHANK2;SHANK1
Yellow	GO_Biological_Process_2018.4	positive regulation of synaptic transmission (GO:0050806)	29/67	7.34336e-14	6.7926e-11	7.9344	239.955	NLGN3;SLC24A2;APP;NLGN2;CLSTN2;CHRNA7;CLSTN1;PTEN;ADRA1A;PRKCZ;SLC8A2;RIMS2;RIMS1;CACNG8;GRIN2A;CUX2;PTK2B;CACNG3;SYT1;PLK2;EIF2AK4;GRIN2C;GRIN2B;SHISA7;STX1B;DLG4;SHANK3;SHANK2;SHANK1
Yellow	DisGeNET.21	Epilepsies, Partial	24/48	2.01177e-13	6.88408e-11	10.3751	303.313	RBFOX1;CDKL5;CHRNA4;FOXG1;KCNA3;TSC2;AKAP6;TSC1;SYN3;CLCN2;GRIN2B;MTOR;SYN1;MECP2;CLCN6;GRIN2A;NR4A3;KANSL1;CNR1;TBC1D24;SCN2A;SCN3A;SPTAN1;SCN1A
Yellow	GO_Biological_Process_2018.5	nervous system development (GO:0007399)	91/455	1.09942e-13	8.13568e-11	2.64641	78.9659	CHRM2;ROBO2;NCKAP1;TENM1;CHRM1;DAGLA;MYT1L;NCAN;PTEN;MTR;VLDLR;KIF17;HAPLN4;PKD1;HAPLN1;ROBO1;RPS6KA3;OPHN1;ENC1;ADORA1;EP300;NRCAM;PCDHAC2;SH3GL2;MYLIP;PCDHGA7;RBFOX1;TRPC5;SZT2;PCDHGA6;TMOD2;PCDHGA1;DYRK1A;NAV1;PPP2R5D;NAV2;HPCAL4;DNM3;ZEB2;NAV3;IL1RAPL2;SCN8A;KCNQ2;ADGRB1;DCX;SHANK3;SHANK2;SHANK1;NLGN3;HDAC4;NLGN2;PCDH10;DCTN1;CAMK2A;ADAM22;PCDH15;NRXN2;TRAK1;NR2C2;KALRN;NPAS2;SLITRK1;SPOCK2;A…
Yellow	DisGeNET.22	Speech Delay	55/213	2.49251e-13	8.14143e-11	3.64951	105.91	SETD5;SETD2;TRIO;MYT1L;IFT172;PTEN;VLDLR;SOBP;PHF8;AFF2;MECP2;RPS6KA3;NIPBL;HERC2;OPHN1;SIN3A;EP300;SOX5;CDKL5;PDE4D;DYRK1A;ARID1A;FOXP1;SETBP1;PACS1;KAT6B;TNIK;ZMYND11;MAPRE2;SHANK3;ATP6V1A;KMT2A;KCNA2;CBL;NALCN;RAI1;GRIN2A;NSD2;SPTBN2;BPTF;CREBBP;MBD5;BRPF1;IQSEC2;USP9X;KIDINS220;HUWE1;L1CAM;LETM1;DLG3;KANSL1;ASXL3;ASXL2;NF1;CDK13
Yellow	DisGeNET.23	Mental and motor retardation	160/1021	4.95222e-13	1.54725e-10	1.99394	56.496	APP;FRMPD4;MYT1L;JMJD1C;UBE3B;CELSR2;NDST1;SYNGAP1;HERC2;OPHN1;HERC1;KIF5C;AKT3;EP300;TRAPPC11;SLC12A6;ARID2;KCNH1;SCN1A;SOX5;SZT2;CDKL5;SLC6A17;VPS33A;CASK;COG1;TSC2;FRMD4A;OCRL;TSC1;ANK1;BCR;PREPL;KAT6B;COL4A1;SCN8A;KAT6A;KCNQ2;SPECC1L;TBC1D24;ATP6V1A;KMT2D;CEP104;SRCAP;ANKRD11;STXBP1;CHRNA7;PCDH15;SLC1A2;ITPR1;CACNA1A;NEDD4L;CACNA1D;TNFRSF11A;CACNA1C;NALCN;RAI1;NACC1;DYM;HIVEP2;KAT14;SPTBN2;BP…
Yellow	GO_Biological_Process_2018.6	peptidyl-serine phosphorylation (GO:0018105)	43/145	6.45285e-13	3.97926e-10	4.40278	123.582	GSK3B;SMG1;PRKAA2;MAST4;PRKDC;TNKS;MAST3;LRRK2;MAST2;CAMK2A;NLK;PRKCZ;PKD1;TTBK1;CAMKK1;TTBK2;CAMKK2;RPS6KA3;MAPK9;MAPK8;AKT3;MAPK1;RICTOR;PRKCG;CAMK1D;PRKCB;PDPK1;PRKCE;PLK2;DYRK1A;LMTK2;DCLK2;DCLK1;HIPK3;MTOR;UHMK1;HIPK2;ERN1;LATS1;DGKQ;CAMK4;ATM;CAMK1G
Yellow	DisGeNET.24	Infantile Spasm	23/48	2.02008e-12	6.04845e-10	9.53917	256.87	NTRK2;CDKL5;FOXG1;STXBP1;MAGI2;TSC2;MLLT1;TSC1;KCNAB2;GRIN2B;DNM1;MTOR;GRIN1;RIMS2;ATXN2;AKT3;KCNQ2;TBC1D24;KIF1A;SCN2A;PLCB1;SPTAN1;SCN1A
Yellow	DisGeNET.25	Severe mental retardation (I.Q. 20-34)	55/224	2.26175e-12	6.50118e-10	3.40989	91.4357	SETD5;C2CD3;CTNND2;ITSN1;UBE3B;SOBP;MECP2;NIPBL;HERC2;HERC1;KIF1A;SPTAN1;SCN1A;KCNH1;CDKL5;SLC6A17;SCAF11;ATRX;DYRK1A;TSC2;CASK;ASH1L;ARID1B;CIT;ZEB2;ARHGEF9;SCN8A;DCX;SHANK3;SHANK2;KMT2A;FOXG1;STXBP1;CACNA1D;NALCN;NSD2;DYM;ZSWIM6;SRGAP3;GRIA3;DYNC1H1;ARFGEF2;MBD5;KCNJ6;IQSEC2;HUWE1;L1CAM;GATAD2B;GRIN1;LETM1;ASXL1;NIN;RAB3GAP2;ACO2;SCN2A
Yellow	GO_Biological_Process_2018.7	phosphorylation (GO:0016310)	79/386	1.37537e-12	7.26982e-10	2.71339	74.1089	APP;GSK3B;MAML1;LRRK2;MAST2;HK1;RPS6KA3;DSTYK;GNPTAB;AKT3;TLK1;MAP3K9;JAK1;MAP3K5;PRKCG;EPHA7;CDKL5;PRKCB;DAPK1;PDPK1;PRKCE;MINK1;DYRK1A;ADAM10;LMTK2;KSR2;DGKZ;BCR;ERN1;LATS1;PEAK1;DGKQ;BIRC6;PIK3C3;TNIK;SIK2;DGKI;BRSK1;BRSK2;PRKAA2;PRKDC;CAMK2A;NLK;PRKCZ;TTBK1;CAMKK2;MAPK9;MAPK8;ACVR1C;PTK2B;MAPK1;MARK4;MARK1;SRPK2;PLK2;INSR;BRAF;EIF2AK4;CDC42BPB;CDC42BPA;MERTK;HIPK3;MTOR;DCLK1;HIPK2;MAPK10;BMP2…
Yellow	Reactome_2016.8	Voltage gated Potassium channels Homo sapiens R-HSA-1296072	21/43	1.163e-11	1.61366e-09	9.88772	248.947	KCNG1;KCNF1;KCNG3;KCNH5;KCNC1;KCND2;KCNB1;KCND3;KCNA1;KCNC3;KCNB2;KCNA2;KCNA3;KCNA4;KCNAB1;KCNA6;KCNAB2;KCNQ2;KCNQ3;KCNQ5;KCNH1
Yellow	KEGG_2019_Human.1	Glutamatergic synapse	36/114	6.28132e-12	1.6143e-09	4.80721	123.994	GRIA1;SLC1A1;SLC1A2;ITPR1;GRIK3;CACNA1A;ADCY3;CACNA1D;CACNA1C;ADCY1;GLS;ADCY5;GRM3;GRM2;GRIN2A;GRM5;MAPK1;DLGAP1;SLC17A7;GRIA3;PRKCG;HOMER1;PRKCB;HOMER2;GRIN2C;GRIN2B;GRIN1;GNAO1;ADCY9;DLG4;GNAQ;GNB1;PLCB1;SHANK3;SHANK2;SHANK1
Yellow	DisGeNET.26	Sunken eyes	34/103	5.96293e-12	1.64806e-09	5.12899	132.561	HDAC4;SRCAP;NALCN;RAI1;OPHN1;SIN3A;CHN1;EP300;MAPK1;DNM1L;GRIA3;ARNT2;CREBBP;SMAD4;CDKL5;PRRT2;IQSEC2;KIDINS220;AGL;DYRK1A;OCRL;PPP2R5D;KCNAB2;GATAD2B;BCR;SKI;SON;SCN8A;KCNQ2;KCNQ3;ERCC6;SCN2A;SHANK3;PLEC
Yellow	DisGeNET.27	Enophthalmos	34/104	8.10976e-12	2.1584e-09	5.05544	129.106	HDAC4;SRCAP;NALCN;RAI1;OPHN1;SIN3A;CHN1;EP300;MAPK1;DNM1L;GRIA3;ARNT2;CREBBP;SMAD4;CDKL5;PRRT2;IQSEC2;KIDINS220;AGL;DYRK1A;OCRL;PPP2R5D;KCNAB2;GATAD2B;BCR;SKI;SON;SCN8A;KCNQ2;KCNQ3;ERCC6;SCN2A;SHANK3;PLEC
Yellow	GO_Biological_Process_2018.8	modulation of chemical synaptic transmission (GO:0050804)	30/82	5.25334e-12	2.42967e-09	5.99696	155.754	NLGN3;GRIA1;APP;MCTP1;NLGN2;CLSTN2;DHX8;LRRK2;CHRNA7;CLSTN1;CAMK2A;GRIK3;PTEN;LRP8;GRM3;RIMS2;GRM2;RIMS1;GRM5;OPHN1;GRIA3;USP46;GRID2;UNC13A;SYT1;SYN3;MAPK8IP2;SYN1;STX1B;DLG4
Yellow	Reactome_2016.9	Interaction between L1 and Ankyrins Homo sapiens R-HSA-445095	17/29	2.31062e-11	2.84976e-09	14.6493	358.776	ANK2;ANK3;L1CAM;ANK1;SPTB;NFASC;SCN8A;KCNQ2;KCNQ3;NRCAM;SCN2A;SCN3A;SPTAN1;SPTBN1;SCN1A;SPTBN2;SCN2B
Yellow	Reactome_2016.10	NGF signalling via TRKA from the plasma membrane Homo sapiens R-HSA-187037	74/374	3.81904e-11	4.23914e-09	2.59434	62.2342	GSK3B;PTEN;AP2A1;ARRB1;AP2A2;CASP9;RPS6KA3;SPRED2;SYNGAP1;RASGEF1A;AKT3;NEFL;PIP4K2B;PIP4K2C;SPTAN1;SH3GL2;JAK1;PRKCG;MEF2A;DUSP3;ACTN2;PDPK1;PRKCE;PAQR3;TSC2;FRS2;PPP2R5D;KSR2;SPTB;DNM1;CNKSR2;DNM3;ADCY9;AKAP9;PSME4;KIT;RAPGEF2;PHLPP2;SHC3;PDE1B;PDE1A;CAMK2A;ITPR1;ADCY3;ADCY1;RASAL2;RASGRP1;EGFR;ADCY5;GRIN2A;MAPK1;RICTOR;PIP5K1C;SPTBN1;SPTBN2;NTRK2;KIDINS220;INSR;FN1;BRAF;AP2B1;GRIN2C;GRIN2B;PTK…
Yellow	GO_Biological_Process_2018.9	neuron projection morphogenesis (GO:0048812)	44/163	1.2113e-11	4.28717e-09	3.86018	97.0323	APP;NCKAP1;BRSK1;BRSK2;CNTNAP1;CTNND2;LRRK2;PLPPR4;PTEN;WASL;NYAP2;CELSR2;MAP2;SLITRK1;MAP6;NRCAM;SLIT3;SLIT2;SRGAP2;EPHB3;PACSIN1;ZNF365;MEF2A;NTNG2;LINGO1;DCC;MINK1;DICER1;ANK3;EIF2AK4;MAPK8IP2;DCLK1;RAB10;STK24;ALS2;DLG4;MAP1B;MAP1A;ADGRB1;TNIK;CNTN4;SHANK3;SHANK2;SHANK1
Yellow	GO_Biological_Process_2018.10	vesicle-mediated transport (GO:0016192)	80/410	1.27936e-11	4.28717e-09	2.55445	64.0709	USP6NL;SNAP25;APP;ZFYVE9;LRRK2;WIPF3;CLTC;MIA3;AP2A1;FMN2;PTPN23;WASL;EEA1;RPH3A;GOLGA4;ANKFY1;KIF1B;ERC1;KIF1A;GIT1;APPL1;NSF;BCAS3;RUBCN;DTX3L;VPS33A;TSC2;LMTK2;SYTL5;MAPK8IP3;DNM1;DNM3;ACAP3;STX1B;HEATR5B;PIK3C3;AMPH;NAPB;LRP1;MGRN1;DCTN1;TGFBRAP1;AGAP2;CLEC16A;AGAP1;ASAP1;VPS26B;TRAK1;LRP8;KALRN;CUX2;VPS53;VTI1A;RAB6B;RAB11FIP3;RAB11FIP4;SPTBN2;SPAG9;ARFGEF1;UVRAG;ARFGEF2;RIC1;SYT1;SORT1;GBF1…
Yellow	GO_Biological_Process_2018.11	modulation of excitatory postsynaptic potential (GO:0098815)	16/25	1.34137e-11	4.28717e-09	18.3761	460.041	NLGN3;APP;NLGN2;CHRNA7;LRRK2;PTEN;PRKCZ;RIMS2;RIMS1;STX1B;CUX2;DLG4;PTK2B;SHANK3;SHANK2;SHANK1
Yellow	GO_Biological_Process_2018.12	positive regulation of excitatory postsynaptic potential (GO:2000463)	14/19	1.39043e-11	4.28717e-09	28.9159	722.863	NLGN3;NLGN2;CHRNA7;PTEN;PRKCZ;RIMS2;RIMS1;STX1B;CUX2;DLG4;PTK2B;SHANK3;SHANK2;SHANK1
Yellow	DisGeNET.28	Seizures, Focal	38/129	1.75263e-11	4.38972e-09	4.35126	107.769	CHRM1;CHRNA4;CTNND2;CHRNA7;FOXG1;SLC1A1;KCNA2;SLC8A1;MECP2;GRIN2A;CNR1;SLC17A7;MPDZ;SCN1A;DYNC1H1;SZT2;RBFOX1;CDKL5;PRRT2;SLC12A5;KCND3;TSC2;TSC1;OPRM1;ADRA2B;SYN2;SYN1;GRIN1;MIB1;BACE1;LETM1;SCN8A;KCNQ2;KCNQ3;TBC1D24;SCN2A;PLCB1;HCN1
Yellow	DisGeNET.29	Profound Mental Retardation	49/196	1.77153e-11	4.38972e-09	3.48467	86.2686	PTEN;MTR;FRY;MECP2;YY1;UNC80;NDST1;SYNGAP1;CHL1;SIN3A;ZNF526;IDS;SCAPER;SPTAN1;SCN1A;PRKCG;KDM6B;CDKL5;PARP1;DCC;DNMT3A;ADRA2B;INPP4A;SETBP1;SCN8A;SHANK3;SHANK2;ATP6V1A;HDAC4;FOXG1;KCNA2;SLC1A2;RAI1;PTCHD1;NSD1;VPS53;SRGAP3;DYNC1H1;KCNJ6;PRRT2;GRIN2B;MED13L;LETM1;ASXL1;SYNJ1;APC;KANSL1;NF1;ERCC6
Yellow	DisGeNET.30	West Syndrome	26/67	2.89826e-11	6.94229e-09	6.58072	159.677	FOXG1;STXBP1;RIMS2;ATXN2;AKT3;SPTAN1;SCN1A;SPTBN2;WDTC1;NTRK2;ARFGEF2;CDKL5;PRRT2;MAGI2;TSC2;TSC1;KCNAB2;GRIN2B;DNM1;MTOR;GRIN1;SCN8A;KCNQ2;TBC1D24;PLCB1;SCN2A
Yellow	DisGeNET.31	Language Delay	50/206	3.51984e-11	8.15921e-09	3.35092	80.6566	SETD5;SETD2;TRIO;MYT1L;IFT172;PTEN;VLDLR;SOBP;PHF8;AFF2;MECP2;RPS6KA3;NIPBL;HERC2;OPHN1;SIN3A;EP300;SOX5;PDE4D;DYRK1A;ARID1A;FOXP1;SETBP1;PACS1;KAT6B;TNIK;ZMYND11;MAPRE2;SHANK3;ATP6V1A;KMT2A;KCNA2;CBL;NALCN;RAI1;GRIN2A;SPTBN2;CREBBP;MBD5;BRPF1;IQSEC2;USP9X;KIDINS220;HUWE1;L1CAM;DLG3;KANSL1;ASXL2;NF1;CDK13
Yellow	Reactome_2016.11	Activation of NMDA receptor upon glutamate binding and postsynaptic events Homo sapiens R-HSA-442755	19/39	1.18043e-10	1.19116e-08	9.83053	224.726	GRIA1;PDPK1;ACTN2;CAMK2A;ADCY3;BRAF;ADCY1;GRIN2C;GRIN2B;CAMKK1;GRIN1;RPS6KA3;GRIN2A;DLG4;CAMK4;AKAP9;NEFL;MAPK1;GRIA3
Yellow	Reactome_2016.12	Signaling by EGFR Homo sapiens R-HSA-177929	70/355	1.51297e-10	1.39949e-08	2.57938	58.3243	GSK3B;PTEN;AP2A1;ARRB1;AP2A2;CASP9;SPRED2;SYNGAP1;RASGEF1A;AKT3;NEFL;PIP4K2B;PIP4K2C;SPTAN1;SH3GL2;JAK1;PRKCG;ACTN2;PDPK1;PRKCE;PAQR3;ADAM10;TSC2;FRS2;PPP2R5D;KSR2;SPTB;CNKSR2;ADCY9;AKAP9;PSME4;KIT;ADAM12;RAPGEF2;PHLPP2;SHC3;PDE1B;PDE1A;CAMK2A;ITPR1;ADCY3;ADCY1;RASAL2;CBL;RASGRP1;EGFR;ADCY5;GRIN2A;MAPK1;RICTOR;PIP5K1C;SPTBN1;SPTBN2;INSR;FN1;BRAF;AP2B1;GRIN2C;GRIN2B;PTK2;MTOR;GRIN1;TNRC6C;AGO3;DLG…
Yellow	WikiPathways_2019_Human.1	Synaptic signaling pathways associated with autism spectrum disorder WP4539	22/50	5.0863e-11	1.86667e-08	8.14082	192.953	GSK3B;NTRK2;PRKAB2;PRKAA2;HOMER1;PTEN;TSC2;TSC1;CACNA1C;GRIN2C;GRIN2B;MTOR;GRIN1;RPTOR;GRIN2A;SYNGAP1;DLG4;CAMK4;AKT3;NF1;MAPK1;SHANK3
Yellow	DisGeNET.32	Developmental delay (disorder)	47/193	1.20187e-10	2.69896e-08	3.36163	76.7863	FBN2;HDAC4;MACF1;RYR2;DOCK3;FOXG1;STXBP1;CHRNA7;CHD8;KCNA3;PTEN;UBE3B;CMIP;MECP2;UNC80;RAI1;HERC2;OPHN1;ARID2;SCN3A;SH2B3;WDTC1;NUP214;ZNF462;NTRK2;CDKL5;USP9X;ABCC8;MARS2;EXOC6B;DYRK1A;DICER1;GRIN2B;MED13L;GNAO1;ASXL1;NCOR1;AGO3;SETBP1;APC;AGO1;ASXL3;KCNQ2;NF1;RAB3GAP2;CNTN4;SHANK3
Yellow	DisGeNET.33	Speech impairment	48/200	1.31456e-10	2.86256e-08	3.29845	75.0474	ATP6V1A;SETD5;SETD2;TRIO;KMT2A;MYT1L;IFT172;PTEN;VLDLR;SOBP;CBL;NALCN;PHF8;AFF2;MECP2;RPS6KA3;RAI1;GRIN2A;NIPBL;HERC2;OPHN1;SIN3A;EP300;SOX5;SPTBN2;CREBBP;MBD5;BRPF1;IQSEC2;USP9X;KIDINS220;PDE4D;HUWE1;DYRK1A;L1CAM;ARID1A;FOXP1;DLG3;KANSL1;PACS1;KAT6B;ASXL2;NF1;TNIK;CDK13;ZMYND11;MAPRE2;SHANK3
Yellow	WikiPathways_2019_Human.2	Rett syndrome causing genes WP4312	21/48	1.59412e-10	2.92521e-08	8.05445	181.705	KDM5B;GABBR2;CDKL5;TRRAP;STXBP1;FOXG1;HTT;CHD4;BRAF;GRIN2B;MECP2;NCOR2;GNAO1;GRIN2A;SYNGAP1;NCOR1;SCN8A;HIVEP2;SCN2A;SHANK3;SCN1A
Yellow	DisGeNET.34	Cognitive delay	145/966	1.60293e-10	3.38783e-08	1.88197	42.446	APP;FRMPD4;MYT1L;JMJD1C;UBE3B;NDST1;SYNGAP1;HERC2;OPHN1;HERC1;KIF5C;EP300;TRAPPC11;SLC12A6;ARID2;KCNH1;SCN1A;SOX5;SZT2;CDKL5;SLC6A17;VPS33A;CASK;COG1;TSC2;FRMD4A;OCRL;TSC1;ANK1;BCR;PREPL;KAT6B;COL4A1;SCN8A;KAT6A;KCNQ2;SPECC1L;TBC1D24;ATP6V1A;KMT2D;CEP104;SRCAP;ANKRD11;CHRNA7;PCDH15;SLC1A2;ITPR1;CACNA1A;NEDD4L;CACNA1D;TNFRSF11A;CACNA1C;NALCN;RAI1;NACC1;DYM;HIVEP2;SPTBN2;SMAD4;HACE1;BRPF1;IQSEC2;BC…
Yellow	DisGeNET.35	Generalized hypotonia	105/633	2.40717e-10	4.94227e-08	2.10322	46.5809	UBE3B;NDST1;RPS6KA3;SYNGAP1;HERC2;OPHN1;HERC1;EP300;TRAPPC11;SLC12A6;KCNH1;SOX5;SZT2;CDKL5;DYRK1A;CASK;LIFR;ANK3;HCFC1;FOXP1;PREPL;KAT6B;SCN8A;KCNQ2;SPECC1L;KMT2D;KMT2A;STXBP1;SLC1A2;CACNA1A;UBR1;NALCN;ACACA;RAI1;ATXN2;ATXN1;NACC1;HIVEP2;CREBBP;HACE1;BRPF1;IQSEC2;BCL11B;GFPT1;MYO5A;BRAF;CPLANE1;GRIN2B;MED13L;ARHGAP31;SON;SYNJ1;DLG3;GNB1;OGDH;ACO2;CDK13;TECPR2;GABRB1;SETD2;CNTNAP1;KCNC3;PTEN;CHD4;…
Yellow	GO_Biological_Process_2018.13	peptidyl-serine modification (GO:0018209)	43/170	2.02501e-10	5.7635e-08	3.53121	78.8176	GSK3B;SMG1;MAST4;PRKDC;TNKS;MAST3;MAST2;LRRK2;GALNT17;CAMK2A;PRKCZ;PKD1;TTBK1;CAMKK1;TTBK2;CAMKK2;RPS6KA3;MAPK9;MAPK8;AKT3;MAPK1;RICTOR;GALNT9;PRKCG;CAMK1D;PARP1;PRKCB;PDPK1;PRKCE;PLK2;DYRK1A;LMTK2;DCLK2;DCLK1;HIPK3;MTOR;UHMK1;HIPK2;LATS1;DGKQ;CAMK4;ATM;CAMK1G
Yellow	WikiPathways_2019_Human.3	Brain-Derived Neurotrophic Factor (BDNF) signaling pathway WP2380	38/144	6.11703e-10	7.48316e-08	3.73242	79.1825	GRIA1;GSK3B;SHC3;DOCK3;PRKAA2;CRTC1;CAMK2A;KCNA3;PTPRF;GRIP1;RPS6KA3;MAPK9;MAPK8;CNR1;PTK2B;MAPK1;KCNN2;GRIA3;NSF;MEF2A;LINGO1;NTRK2;CDKL5;PDPK1;SORT1;KIDINS220;NTRK3;TSC2;FRS2;GRIN2B;SYN1;MTOR;GRIN1;MAPK10;TIAM1;BMP2;APC;CAMK4
Yellow	Reactome_2016.13	Potassium Channels Homo sapiens R-HSA-1296071	30/99	1.08661e-09	9.27794e-08	4.51522	93.1951	KCNG1;KCNG3;KCNC1;KCNC3;KCNA1;KCNA2;KCNA3;KCNA4;KCNA6;KCNN2;KCNN3;KCNH1;KCNF1;GABBR2;KCNJ6;GABBR1;KCNH5;KCND2;KCND3;ABCC8;KCNB1;KCNB2;KCNAB1;KCNAB2;KCNQ2;GNB1;KCNMA1;KCNQ3;KCNQ5;HCN1
Yellow	Reactome_2016.14	Post NMDA receptor activation events Homo sapiens R-HSA-438064	17/35	1.20194e-09	9.52966e-08	9.76301	200.526	PDPK1;ACTN2;CAMK2A;ADCY3;BRAF;ADCY1;GRIN2C;GRIN2B;CAMKK1;GRIN1;RPS6KA3;GRIN2A;DLG4;CAMK4;AKAP9;NEFL;MAPK1
Yellow	GO_Biological_Process_2018.14	regulation of neurotransmitter receptor activity (GO:0099601)	17/33	3.67447e-10	9.68876e-08	10.9846	238.634	APP;LYNX1;NLGN2;DAPK1;MINK1;OPRM1;MAPK8IP2;SHISA7;CACNG8;NETO1;DLG4;PTK2B;CACNG3;CNIH3;SHANK3;SHANK2;SHANK1
Yellow	GO_Biological_Process_2018.15	anterograde trans-synaptic signaling (GO:0098916)	53/240	3.92787e-10	9.68876e-08	2.9632	64.1763	GABRB2;SNAP25;GABRB1;GRM3;GRM2;HTR6;GRM5;DLGAP1;SLC12A6;BSN;KCND2;MINK1;OPRM1;GABRG3;SYN2;SYN1;CACNB1;CACNB2;CACNB4;AKAP9;KCNQ2;KCNQ3;EXOC4;AMPH;OPRD1;GRIA1;CHRNA4;KCNA1;CHRNA7;SLC1A1;SLC1A2;CACNA1B;CACNA1A;NRXN2;AKAP5;CACNA1E;GRIN2A;MAPK1;GABBR2;SLC12A5;HOMER1;SYT1;GABRA4;PCDHB13;PCDHB11;GRIN2B;DLG2;DLG3;DLG4;SYT10;APBA1;APBA2;SCN2B
Yellow	DisGeNET.36	Mental Retardation, Psychosocial	37/138	6.30956e-10	1.25946e-07	3.81297	80.7732	HDAC4;FOXG1;KCNA2;PTEN;FRY;YY1;MECP2;NDST1;RAI1;SYNGAP1;PTCHD1;CHL1;SIN3A;NSD1;ZNF526;SRGAP3;SCAPER;SCN1A;PRKCG;KDM6B;DYNC1H1;PRRT2;PARP1;DCC;DNMT3A;GRIN2B;ADRA2B;MED13L;INPP4A;LETM1;SETBP1;APC;KANSL1;SCN8A;NF1;SHANK3;SHANK2
Yellow	GO_Biological_Process_2018.16	positive regulation of neuron projection development (GO:0010976)	30/97	6.26709e-10	1.44926e-07	4.65052	98.547	CPNE9;ITSN2;ROBO2;TENM3;PLPPR5;NEDD4L;VLDLR;LRP8;ARHGAP35;ROBO1;RIMS2;RIMS1;SLITRK1;PLXNA2;ABL2;PTK2B;SLIT2;PLXNA4;PACSIN1;NTRK2;UNC13A;CAMK1D;SYT1;KIDINS220;MAGI2;COBL;CBFA2T2;SETX;LRRC7;RAPGEF2
Yellow	Reactome_2016.15	Signaling by FGFR4 Homo sapiens R-HSA-5654743	64/332	2.38564e-09	1.76537e-07	2.50147	49.6637	GSK3B;PTEN;ARRB1;CASP9;SPRED2;SYNGAP1;RASGEF1A;AKT3;NEFL;PIP4K2B;PIP4K2C;SPTAN1;JAK1;PRKCG;ACTN2;PDPK1;PRKCE;PAQR3;TSC2;FRS2;PPP2R5D;KSR2;SPTB;CNKSR2;ADCY9;AKAP9;PSME4;KIT;RAPGEF2;PHLPP2;SHC3;PDE1B;PDE1A;CAMK2A;ITPR1;ADCY3;ADCY1;RASAL2;CBL;RASGRP1;EGFR;ADCY5;GRIN2A;MAPK1;RICTOR;PIP5K1C;SPTBN1;SPTBN2;INSR;FN1;BRAF;GRIN2C;GRIN2B;PTK2;MTOR;GRIN1;TNRC6C;AGO3;DLG4;AGO1;CAMK4;AGO2;NF1;TNRC6B
Yellow	Reactome_2016.16	Signaling by FGFR3 Homo sapiens R-HSA-5654741	64/333	2.70227e-09	1.8747e-07	2.49203	49.1658	GSK3B;PTEN;ARRB1;CASP9;SPRED2;SYNGAP1;RASGEF1A;AKT3;NEFL;PIP4K2B;PIP4K2C;SPTAN1;JAK1;PRKCG;ACTN2;PDPK1;PRKCE;PAQR3;TSC2;FRS2;PPP2R5D;KSR2;SPTB;CNKSR2;ADCY9;AKAP9;PSME4;KIT;RAPGEF2;PHLPP2;SHC3;PDE1B;PDE1A;CAMK2A;ITPR1;ADCY3;ADCY1;RASAL2;CBL;RASGRP1;EGFR;ADCY5;GRIN2A;MAPK1;RICTOR;PIP5K1C;SPTBN1;SPTBN2;INSR;FN1;BRAF;GRIN2C;GRIN2B;PTK2;MTOR;GRIN1;TNRC6C;AGO3;DLG4;AGO1;CAMK4;AGO2;NF1;TNRC6B
Yellow	Reactome_2016.17	Signaling by FGFR1 Homo sapiens R-HSA-5654736	64/336	3.91072e-09	2.31353e-07	2.46414	47.7046	GSK3B;PTEN;ARRB1;CASP9;SPRED2;SYNGAP1;RASGEF1A;AKT3;NEFL;PIP4K2B;PIP4K2C;SPTAN1;JAK1;PRKCG;ACTN2;PDPK1;PRKCE;PAQR3;TSC2;FRS2;PPP2R5D;KSR2;SPTB;CNKSR2;ADCY9;AKAP9;PSME4;KIT;RAPGEF2;PHLPP2;SHC3;PDE1B;PDE1A;CAMK2A;ITPR1;ADCY3;ADCY1;RASAL2;CBL;RASGRP1;EGFR;ADCY5;GRIN2A;MAPK1;RICTOR;PIP5K1C;SPTBN1;SPTBN2;INSR;FN1;BRAF;GRIN2C;GRIN2B;PTK2;MTOR;GRIN1;TNRC6C;AGO3;DLG4;AGO1;CAMK4;AGO2;NF1;TNRC6B
Yellow	Reactome_2016.18	Downstream signaling of activated FGFR2 Homo sapiens R-HSA-5654696	63/329	4.16853e-09	2.31353e-07	2.47973	47.8481	GSK3B;PTEN;ARRB1;CASP9;SPRED2;SYNGAP1;RASGEF1A;AKT3;NEFL;PIP4K2B;PIP4K2C;SPTAN1;JAK1;PRKCG;ACTN2;PDPK1;PRKCE;PAQR3;TSC2;FRS2;PPP2R5D;KSR2;SPTB;CNKSR2;ADCY9;AKAP9;PSME4;KIT;RAPGEF2;PHLPP2;SHC3;PDE1B;PDE1A;CAMK2A;ITPR1;ADCY3;ADCY1;RASAL2;RASGRP1;EGFR;ADCY5;GRIN2A;MAPK1;RICTOR;PIP5K1C;SPTBN1;SPTBN2;INSR;FN1;BRAF;GRIN2C;GRIN2B;PTK2;MTOR;GRIN1;TNRC6C;AGO3;DLG4;AGO1;CAMK4;AGO2;NF1;TNRC6B
Yellow	Reactome_2016.19	Downstream signaling of activated FGFR4 Homo sapiens R-HSA-5654716	63/329	4.16853e-09	2.31353e-07	2.47973	47.8481	GSK3B;PTEN;ARRB1;CASP9;SPRED2;SYNGAP1;RASGEF1A;AKT3;NEFL;PIP4K2B;PIP4K2C;SPTAN1;JAK1;PRKCG;ACTN2;PDPK1;PRKCE;PAQR3;TSC2;FRS2;PPP2R5D;KSR2;SPTB;CNKSR2;ADCY9;AKAP9;PSME4;KIT;RAPGEF2;PHLPP2;SHC3;PDE1B;PDE1A;CAMK2A;ITPR1;ADCY3;ADCY1;RASAL2;RASGRP1;EGFR;ADCY5;GRIN2A;MAPK1;RICTOR;PIP5K1C;SPTBN1;SPTBN2;INSR;FN1;BRAF;GRIN2C;GRIN2B;PTK2;MTOR;GRIN1;TNRC6C;AGO3;DLG4;AGO1;CAMK4;AGO2;NF1;TNRC6B
Yellow	Reactome_2016.20	Downstream signaling of activated FGFR3 Homo sapiens R-HSA-5654708	63/329	4.16853e-09	2.31353e-07	2.47973	47.8481	GSK3B;PTEN;ARRB1;CASP9;SPRED2;SYNGAP1;RASGEF1A;AKT3;NEFL;PIP4K2B;PIP4K2C;SPTAN1;JAK1;PRKCG;ACTN2;PDPK1;PRKCE;PAQR3;TSC2;FRS2;PPP2R5D;KSR2;SPTB;CNKSR2;ADCY9;AKAP9;PSME4;KIT;RAPGEF2;PHLPP2;SHC3;PDE1B;PDE1A;CAMK2A;ITPR1;ADCY3;ADCY1;RASAL2;RASGRP1;EGFR;ADCY5;GRIN2A;MAPK1;RICTOR;PIP5K1C;SPTBN1;SPTBN2;INSR;FN1;BRAF;GRIN2C;GRIN2B;PTK2;MTOR;GRIN1;TNRC6C;AGO3;DLG4;AGO1;CAMK4;AGO2;NF1;TNRC6B
Yellow	DisGeNET.37	Strabismus	74/404	1.48511e-09	2.88433e-07	2.35455	47.8627	SETD5;ATP8A2;PTEN;VLDLR;UBE3B;RBPJ;LYST;MED12;NIPBL;HERC2;OPA1;OPHN1;SIN3A;TRAPPC11;DNM1L;ARID2;GTF2I;SOX5;STRADA;ABCC8;CASK;FRMD4A;PPP2R5D;KCNAB2;ARID1A;ARID1B;FOXP1;KAT6B;PACS1;KAT6A;SPECC1L;CDH11;SHANK3;ATP6V1A;KMT2D;ZNF592;KMT2A;STXBP1;NEDD4L;SEMA3E;UBR1;NALCN;RAI1;NSD1;CHN1;NSD2;EVC2;ARNT2;SMAD4;HACE1;BRPF1;IQSEC2;USP9X;ZBTB16;GFPT1;BRAF;L1CAM;GATAD2B;MED13L;LETM1;SKI;ASXL1;ARHGAP31;SON;DLG3…
Yellow	GO_Biological_Process_2018.17	neuron projection development (GO:0031175)	41/167	1.39635e-09	3.03911e-07	3.38997	69.1195	RB1;APP;NCKAP1;GSK3B;CNTNAP1;CTNND2;LRRK2;PTEN;WASL;FRY;NYAP2;PPP1R9A;CAMSAP1;CAMSAP2;PPP1R9B;OPHN1;MAP2;SRGAP2;SH3GL2;EPHB3;PACSIN1;ZNF365;EPHA4;MINK1;DICER1;L1CAM;DCLK1;UHMK1;STK24;ALS2;DLG4;NEDD4;CDH11;TBC1D24;RAPGEF2;TNIK;CNTN4;SHANK3;SHANK2;FRYL;SHANK1
Yellow	Reactome_2016.21	Downstream signaling of activated FGFR1 Homo sapiens R-HSA-5654687	63/332	6.0169e-09	3.18036e-07	2.45167	46.4068	GSK3B;PTEN;ARRB1;CASP9;SPRED2;SYNGAP1;RASGEF1A;AKT3;NEFL;PIP4K2B;PIP4K2C;SPTAN1;JAK1;PRKCG;ACTN2;PDPK1;PRKCE;PAQR3;TSC2;FRS2;PPP2R5D;KSR2;SPTB;CNKSR2;ADCY9;AKAP9;PSME4;KIT;RAPGEF2;PHLPP2;SHC3;PDE1B;PDE1A;CAMK2A;ITPR1;ADCY3;ADCY1;RASAL2;RASGRP1;EGFR;ADCY5;GRIN2A;MAPK1;RICTOR;PIP5K1C;SPTBN1;SPTBN2;INSR;FN1;BRAF;GRIN2C;GRIN2B;PTK2;MTOR;GRIN1;TNRC6C;AGO3;DLG4;AGO1;CAMK4;AGO2;NF1;TNRC6B
Yellow	DisGeNET.38	Orbital separation excessive	69/368	1.9365e-09	3.58524e-07	2.42017	48.5545	RB1;SETD2;CTNND2;PTEN;CHD4;AFF4;MED12;RPS6KA3;GRIP1;SMCHD1;ADAMTS3;HERC1;SIN3A;AKT3;EPG5;SLC12A6;KCNH1;APC2;PDE4D;ATRX;CASK;TBR1;PPP2R5D;ARID1B;CIT;FOXP1;SETBP1;PACS1;KAT6B;SPECC1L;CDH11;ZMYND11;ATP6V1A;ZNF592;KMT2A;ANKRD11;GREB1L;MLLT1;CBL;NALCN;RAI1;ANKH;NSD1;NSD2;KIAA0753;ZSWIM6;LRRC8A;SMAD4;SMAD3;BRPF1;IQSEC2;BCL11B;INSR;BRAF;CPLANE1;GATAD2B;MTOR;MED13L;LETM1;SKI;ASXL1;BMP2;FRAS1;APC;ASXL2;CN…
Yellow	DisGeNET.39	Unipolar Depression	88/517	1.94579e-09	3.58524e-07	2.15967	43.3178	CHRM2;SNAP25;APP;GSK3B;PTPRR;TRIO;MTMR12;CLSTN2;TENM4;MYT1L;NCAN;CTNND2;RAPH1;ARRB1;LAMC2;ADARB1;VLDLR;ADRA1A;SYNE1;PPP1R9B;MECP2;MED12;GRM5;PCLO;KHSRP;NEFL;PDE4A;DST;PRKCB;DCC;KSR2;ANK3;OPRM1;CIT;BCR;CACNB2;NUP98;PLCB1;CLOCK;DGKH;GRIA1;HLF;LRP1;CHRNA4;SEMA3A;CHRNA7;SLC1A1;CAMK2A;SLC1A2;HTT;CACNA1C;KRBA1;NLK;LRP8;KALRN;EGFR;NPAS2;ADCY5;PDZD2;MAP2;CNR1;HECTD4;CMYA5;SLIT3;TPPP;PCNT;CSMD1;WASF3;NTRK…
Yellow	KEGG_2019_Human.2	Circadian entrainment	29/97	2.90657e-09	3.73495e-07	4.42661	87.0108	GRIA1;RYR2;CAMK2A;ITPR1;ADCY3;CACNA1D;CACNA1C;ADCY1;RYR3;ADCY5;GRIN2A;MAPK1;GRIA3;PRKCG;GUCY1A2;GUCY1A1;KCNJ6;PRKCB;GRIN2C;GRIN2B;GRIN1;GNAO1;PER2;PER1;ADCY9;GNAQ;GNB1;NOS1AP;PLCB1
Yellow	GO_Biological_Process_2018.18	glutamate receptor signaling pathway (GO:0007215)	17/36	2.08871e-09	3.99037e-07	9.24866	184.85	APP;GRID2;DAGLA;HOMER1;KCNB1;HOMER2;GRIK3;GRIN2C;GRIN2B;GRM3;GRM2;GRM5;GRIN2A;GNAQ;PTK2B;PLCB1;GRIA3
Yellow	GO_Biological_Process_2018.19	dendrite morphogenesis (GO:0048813)	16/32	2.15696e-09	3.99037e-07	10.3326	206.182	MEF2A;CHRNA7;CTNND2;MINK1;PTEN;WASL;MAPK8IP2;CELSR2;MAP2;DLG4;MAP6;SHANK3;SHANK2;ZNF365;EPHB3;SHANK1
Yellow	GO_Biological_Process_2018.20	regulation of glutamate receptor signaling pathway (GO:1900449)	16/32	2.15696e-09	3.99037e-07	10.3326	206.182	APP;NLGN2;DAPK1;MINK1;OPRM1;MAPK8IP2;SHISA7;CACNG8;NETO1;DLG4;PTK2B;CACNG3;CNIH3;SHANK3;SHANK2;SHANK1
Yellow	WikiPathways_2019_Human.4	Synaptic Vesicle Pathway WP2267	20/51	4.46683e-09	4.09832e-07	6.67584	128.354	NSF;SNAP25;UNC13A;SYT1;STXBP1;CLTC;CACNA1B;CACNA1A;AP2A1;AP2B1;SYN3;AP2A2;SYN2;DNM1;SYN1;DNM3;RIMS1;STX1B;SLC17A7;DNM1L
Yellow	Reactome_2016.22	Trafficking of AMPA receptors Homo sapiens R-HSA-399719	15/31	1.22914e-08	5.93193e-07	9.6813	176.339	GRIA1;NSF;PRKCG;PRKCB;CAMK2A;AP2A1;AKAP5;AP2B1;AP2A2;GRIP1;CACNG8;EPB41L1;DLG4;CACNG3;GRIA3
Yellow	Reactome_2016.23	Glutamate Binding, Activation of AMPA Receptors and Synaptic Plasticity Homo sapiens R-HSA-399721	15/31	1.22914e-08	5.93193e-07	9.6813	176.339	GRIA1;NSF;PRKCG;PRKCB;CAMK2A;AP2A1;AKAP5;AP2B1;AP2A2;GRIP1;CACNG8;EPB41L1;DLG4;CACNG3;GRIA3
Yellow	Reactome_2016.24	Downstream signal transduction Homo sapiens R-HSA-186763	63/341	1.74298e-08	8.06128e-07	2.37111	42.36	GSK3B;PTEN;ARRB1;CASP9;SPRED2;SYNGAP1;RASGEF1A;AKT3;NEFL;PIP4K2B;PIP4K2C;SPTAN1;JAK1;PRKCG;ACTN2;PDPK1;PRKCE;PAQR3;TSC2;FRS2;PPP2R5D;KSR2;SPTB;CNKSR2;ADCY9;AKAP9;PSME4;KIT;RAPGEF2;PHLPP2;SHC3;PDE1B;PDE1A;CAMK2A;ITPR1;ADCY3;ADCY1;RASAL2;RASGRP1;EGFR;ADCY5;GRIN2A;MAPK1;RICTOR;PIP5K1C;SPTBN1;SPTBN2;INSR;FN1;BRAF;GRIN2C;GRIN2B;PTK2;MTOR;GRIN1;TNRC6C;AGO3;DLG4;AGO1;CAMK4;AGO2;NF1;TNRC6B
Yellow	DisGeNET.40	Ataxias, Hereditary	40/167	4.75499e-09	8.54234e-07	3.27918	62.8424	SNAP25;ATP8A2;ZNF592;KCNC3;KCNA1;ITPR1;UBR4;CACNA1A;ATP1A3;VLDLR;PRICKLE1;TTBK2;SYNE1;ZFYVE26;ATXN2;ATXN1;PCLO;OPHN1;VPS53;SACS;SPTBN2;PRKCG;RUBCN;DYNC1H1;GRID2;PRRT2;COG5;KCND3;MARS2;VPS13D;CASK;SYT14;TTC19;SETX;CACNB4;POLR3A;SCN8A;DNAJC5;DMXL2;CCDC88C
Yellow	Reactome_2016.25	Unblocking of NMDA receptor, glutamate binding and activation Homo sapiens R-HSA-438066	11/17	1.98748e-08	8.8244e-07	18.8998	335.166	GRIA1;GRIN2A;ACTN2;DLG4;CAMK2A;AKAP9;NEFL;GRIN2C;GRIN2B;GRIA3;GRIN1
Yellow	DisGeNET.41	Downward slant of palpebral fissure	48/222	5.41903e-09	9.49785e-07	2.8779	54.776	ATP6V1A;SETD2;TRIO;KMT2A;FOXG1;CTNND2;PTEN;SEMA3E;CBL;NALCN;MECP2;MED12;RPS6KA3;RAI1;SYNGAP1;HERC1;SIN3A;NSD1;NSD2;EP300;PCNT;SOX5;APC2;DYNC1H1;CREBBP;SZT2;BRPF1;VPS13B;BRAF;TBR1;PPP2R5D;ARID1B;MTOR;FOXP1;LETM1;SKI;BMP2;SON;SETBP1;APC;PACS1;KAT6B;SPECC1L;CDH11;NF1;RAB3GAP2;LZTR1;MAPRE2
Yellow	KEGG_2019_Human.3	Morphine addiction	27/91	1.21435e-08	1.04029e-06	4.37488	79.7385	GABRB2;GABRB1;PDE1B;PDE1A;CACNA1B;ADCY3;CACNA1A;ARRB1;ADCY1;ADCY5;GRK5;ADORA1;PDE4A;PRKCG;GABBR2;KCNJ6;GABBR1;PRKCB;PDE4D;GABRA4;PDE2A;OPRM1;GABRG3;GNAO1;ADCY9;PDE10A;GNB1
Yellow	Reactome_2016.26	DAP12 signaling Homo sapiens R-HSA-2424491	63/344	2.45485e-08	1.04803e-06	2.3454	41.0975	GSK3B;PTEN;ARRB1;CASP9;SPRED2;SYNGAP1;RASGEF1A;AKT3;NEFL;PIP4K2B;PIP4K2C;SPTAN1;JAK1;PRKCG;ACTN2;PDPK1;PRKCE;PAQR3;TSC2;FRS2;PPP2R5D;KSR2;SPTB;CNKSR2;ADCY9;AKAP9;PSME4;KIT;RAPGEF2;PHLPP2;SHC3;PDE1B;PDE1A;CAMK2A;ITPR1;ADCY3;ADCY1;RASAL2;RASGRP1;EGFR;ADCY5;GRIN2A;MAPK1;RICTOR;PIP5K1C;SPTBN1;SPTBN2;INSR;FN1;BRAF;GRIN2C;GRIN2B;PTK2;MTOR;GRIN1;TNRC6C;AGO3;DLG4;AGO1;CAMK4;AGO2;NF1;TNRC6B
Yellow	GO_Biological_Process_2018.21	protein autophosphorylation (GO:0046777)	41/175	6.12316e-09	1.07884e-06	3.18618	60.2544	GSK3B;SMG1;LRRK2;CAMK2A;EGFR;CAMKK2;SLK;GRK5;ABL2;PTK2B;MAP3K9;EPHB3;JAK1;EPHA4;NTRK2;CDKL5;DAPK1;PDPK1;INSR;MINK1;DYRK1A;LMTK2;EIF2AK4;PTK2;MTOR;UHMK1;ERN1;STK24;PEAK1;WNK2;CAMK4;TAOK1;WNK3;KIT;AAK1;ULK2;ATM;SIK2;TNIK;CDK12;MAP3K13
Yellow	GO_Biological_Process_2018.22	calcium ion transport into cytosol (GO:0060402)	12/19	6.54811e-09	1.10127e-06	17.6816	333.194	JPH4;RYR2;TRPM2;GRIN2A;JPH3;ATP2B4;CACNA1C;GRIN2C;JPH1;ADRA1A;GRIN2B;SLC8A1
Yellow	Reactome_2016.27	Chromatin organization Homo sapiens R-HSA-4839726	47/226	2.82063e-08	1.11818e-06	2.73688	47.5772	KMT2E;KMT2D;KDM5B;SETD2;KDM3A;KMT2A;TRRAP;KDM1B;KMT2C;SETD7;KMT2B;CHD4;JADE2;CHD3;PHF8;NSD1;SAP130;EP400;EP300;KAT7;ARID2;MTA3;NCOA1;KDM6B;ATF7IP;NCOA2;SMARCC1;CREBBP;SMARCC2;KDM2A;BRPF1;BRPF3;SETD1B;USP22;DNMT3A;ARID1A;ARID1B;GATAD2B;HCFC1;NCOR2;NCOR1;KANSL1;KAT6B;KAT6A;CARM1;CLOCK;OGT
Yellow	Reactome_2016.28	Chromatin modifying enzymes Homo sapiens R-HSA-3247509	47/226	2.82063e-08	1.11818e-06	2.73688	47.5772	KMT2E;KMT2D;KDM5B;SETD2;KDM3A;KMT2A;TRRAP;KDM1B;KMT2C;SETD7;KMT2B;CHD4;JADE2;CHD3;PHF8;NSD1;SAP130;EP400;EP300;KAT7;ARID2;MTA3;NCOA1;KDM6B;ATF7IP;NCOA2;SMARCC1;CREBBP;SMARCC2;KDM2A;BRPF1;BRPF3;SETD1B;USP22;DNMT3A;ARID1A;ARID1B;GATAD2B;HCFC1;NCOR2;NCOR1;KANSL1;KAT6B;KAT6A;CARM1;CLOCK;OGT
Yellow	GO_Biological_Process_2018.23	regulation of neuron projection development (GO:0010975)	32/119	8.24176e-09	1.32585e-06	3.82036	71.1123	PTPRS;TENM3;SEMA3A;PLPPR5;PTEN;ARHGAP35;CAMSAP2;SIPA1L1;CHN1;ABL2;SPOCK1;PTK2B;CSMD3;LRRC4C;EPHB3;ZNF365;MYLIP;EPHA4;NTRK2;CDKL5;CAMK1D;DCC;KIDINS220;PAQR3;MAGI2;SSH2;CBFA2T2;SETX;GAK;STX1B;LRRC7;RAPGEF2
Yellow	Reactome_2016.29	BMAL1:CLOCK,NPAS2 activates circadian gene expression Homo sapiens R-HSA-1368108	17/42	3.68457e-08	1.4103e-06	7.02667	120.272	NCOA1;NCOA2;MED1;CREBBP;CRTC1;CHD9;NCOA6;NPAS2;ARNTL;HELZ2;PER2;PER1;NCOR1;CARM1;CRY2;EP300;CLOCK
Yellow	DisGeNET.42	Epilepsy, Cryptogenic	22/63	9.7081e-09	1.66101e-06	5.55561	102.503	CHRM2;OPRD1;CHRM1;SLC12A5;SLC1A1;SLC1A2;TSC2;TSC1;OPRM1;KCNAB2;GRIN2B;ERN1;STX1B;GRIN2A;SYNGAP1;SCN8A;KCNQ2;DCX;SCN2A;KCNH1;SCN1A;HCN1
Yellow	Reactome_2016.30	Signaling by Rho GTPases Homo sapiens R-HSA-194315	65/367	5.54174e-08	2.05044e-06	2.25158	37.6202	CYFIP2;NCKAP1;AHCTF1;TRIO;ITSN1;WIPF3;ARHGAP39;WASL;ARHGAP35;ARHGAP44;AKAP13;OPHN1;MCF2L;YWHAG;MEN1;ARHGEF11;NCOA2;ACTR2;ARHGEF12;PPP1R12A;NUP133;PDPK1;ARHGEF17;OCRL;PPP2R5D;CKAP5;CIT;BCR;TIAM2;TIAM1;ARHGEF9;CLIP1;ARHGEF3;MYH9;PIK3C3;NUP98;ARHGEF2;PPP1R12B;SRF;KALRN;INPP5B;ABR;KLC2;CHN1;MAPK1;SRGAP3;SRGAP2;MYH10;SCAI;CLASP1;WASF3;CLASP2;RANBP2;ARHGAP26;MYO9A;PTK2;ARHGAP33;ARHGAP32;ARHGAP31;DIAPH2…
Yellow	DisGeNET.43	Cortical Dysplasia	22/64	1.35575e-08	2.26568e-06	5.42304	98.2455	DYNC1H1;LINGO1;KCNJ6;SLC1A1;PTEN;TSC2;TSC1;GRIN2B;MTOR;NR4A2;NDST1;GRIN2A;ARHGAP31;CUX2;KIF5C;COL4A1;MAP2;DLG4;MAP1B;AKT3;DCX;SCN2A
Yellow	Reactome_2016.31	Signaling by FGFR2 Homo sapiens R-HSA-5654738	64/361	6.74345e-08	2.41459e-06	2.25357	37.2113	GSK3B;PTEN;ARRB1;CASP9;SPRED2;SYNGAP1;RASGEF1A;AKT3;NEFL;PIP4K2B;PIP4K2C;SPTAN1;JAK1;PRKCG;ACTN2;PDPK1;PRKCE;PAQR3;TSC2;FRS2;PPP2R5D;KSR2;SPTB;CNKSR2;ADCY9;AKAP9;PSME4;KIT;RAPGEF2;PHLPP2;SHC3;PDE1B;PDE1A;CAMK2A;ITPR1;ADCY3;ADCY1;RASAL2;CBL;RASGRP1;EGFR;ADCY5;GRIN2A;MAPK1;RICTOR;PIP5K1C;SPTBN1;SPTBN2;INSR;FN1;BRAF;GRIN2C;GRIN2B;PTK2;MTOR;GRIN1;TNRC6C;AGO3;DLG4;AGO1;CAMK4;AGO2;NF1;TNRC6B
Yellow	WikiPathways_2019_Human.5	Splicing factor NOVA regulated synaptic proteins WP4148	17/42	3.68457e-08	2.70447e-06	7.02667	120.272	GABBR2;KCNJ6;CLSTN1;CASK;ANK3;ATP2B1;PRKCZ;GRIN2B;GPHN;GRIN1;MAPK9;EPB41L1;CHL1;KCNQ2;KCNMA1;NEO1;CLASP1
Yellow	DisGeNET.44	Macrostomia	29/104	1.68104e-08	2.74545e-06	4.01192	71.8184	ZNF592;SRCAP;FOXG1;STXBP1;ANKRD11;UBE3B;NALCN;MECP2;MED12;RPS6KA3;ARID2;GTF2I;KCNH1;GABBR2;MBD5;CDKL5;BRPF1;INSR;ATRX;ARID1A;ARID1B;MTOR;GATAD2B;MED13L;FRAS1;PACS1;HECW2;SPECC1L;ZMYND11
Yellow	DisGeNET.45	Cognition Disorders	49/237	1.75458e-08	2.80187e-06	2.71854	48.5489	APP;GSK3B;SNAP25;DCLRE1C;LRRK2;LAMC2;VLDLR;AFF4;GRM5;CHL1;SCN1A;GTF2I;DYRK1A;ADAM10;TSC1;ANK3;MAPK8IP2;AP3B2;HCFC1;FOXP1;BACE1;SCN8A;AMPH;ASTN2;SHANK2;NUFIP2;CHRNA4;CHRNA7;SLC1A1;SLC1A2;HTT;CACNA1C;CNR1;MAPK1;SPTBN1;UBQLN2;SRPK2;CREBBP;SMAD4;HOMER2;BRAF;GRIN2B;MTOR;MED13L;MAPK10;BMP2;SYNJ1;NOVA2;NF1
Yellow	DisGeNET.46	Pervasive Development Disorder	33/129	1.8632e-08	2.91065e-06	3.57067	63.5521	NLGN3;TRIO;CTNND2;KMT2C;CHD8;SLC1A1;PTEN;HTT;LAMC2;SLC2A3;TCF20;CMIP;GPHN;AFF2;MECP2;HERC2;PTCHD1;MPDZ;RAB11FIP5;USP7;RBFOX1;MBD5;CASK;PPP2R5D;SYN1;FOXP1;APC;GAN;CNTN4;SCN2A;SHANK3;SHANK2;SHANK1
Yellow	KEGG_2019_Human.4	Endocytosis	49/244	4.63265e-08	2.97647e-06	2.61993	44.2442	ZFYVE9;WIPF3;CLTC;SNX12;AP2A1;ARRB1;WASL;AP2A2;EEA1;KIF5C;GIT1;SH3GL2;USP8;DNM1;EPN2;DNM3;ACAP3;DNAJC6;AMPH;AGAP2;NEDD4L;AGAP1;ASAP1;VPS26B;CBL;PRKCZ;EGFR;GRK5;PIP5K1C;RAB11FIP2;RAB11FIP3;RAB11FIP4;RAB11FIP5;SMAD2;ARFGEF1;ARFGEF2;SMAD3;IQSEC2;SMURF2;IQSEC1;IQSEC3;GBF1;AP2B1;RAB10;EHD3;EHD4;NEDD4;SMAP2;SMAP1
Yellow	GO_Biological_Process_2018.24	regulation of axonogenesis (GO:0050770)	20/55	2.05483e-08	3.16786e-06	5.91159	104.638	ROBO2;EPHA4;LINGO1;NTRK2;PTEN;SSH2;ARHGAP35;ROBO1;SIPA1L1;SLITRK1;CHN1;PLXNA2;ZSWIM8;NRCAM;ZSWIM6;SLIT2;LRRC4C;ZSWIM5;PLXNA4;EPHB3
Yellow	Reactome_2016.32	Signaling by PDGF Homo sapiens R-HSA-186797	64/364	9.24535e-08	3.20698e-06	2.23067	36.1291	GSK3B;PTEN;ARRB1;CASP9;SPRED2;SYNGAP1;RASGEF1A;AKT3;NEFL;PIP4K2B;PIP4K2C;SPTAN1;JAK1;PRKCG;ACTN2;PDPK1;PRKCE;PAQR3;TSC2;FRS2;PPP2R5D;KSR2;SPTB;CNKSR2;ADCY9;COL4A1;AKAP9;PSME4;KIT;RAPGEF2;PHLPP2;SHC3;PDE1B;PDE1A;CAMK2A;ITPR1;ADCY3;ADCY1;RASAL2;RASGRP1;EGFR;ADCY5;GRIN2A;MAPK1;RICTOR;PIP5K1C;SPTBN1;SPTBN2;INSR;FN1;BRAF;GRIN2C;GRIN2B;PTK2;MTOR;GRIN1;TNRC6C;AGO3;DLG4;AGO1;CAMK4;AGO2;NF1;TNRC6B
Yellow	Reactome_2016.33	Signaling by FGFR Homo sapiens R-HSA-190236	64/366	1.13767e-07	3.79318e-06	2.21565	35.4262	GSK3B;PTEN;ARRB1;CASP9;SPRED2;SYNGAP1;RASGEF1A;AKT3;NEFL;PIP4K2B;PIP4K2C;SPTAN1;JAK1;PRKCG;ACTN2;PDPK1;PRKCE;PAQR3;TSC2;FRS2;PPP2R5D;KSR2;SPTB;CNKSR2;ADCY9;AKAP9;PSME4;KIT;RAPGEF2;PHLPP2;SHC3;PDE1B;PDE1A;CAMK2A;ITPR1;ADCY3;ADCY1;RASAL2;CBL;RASGRP1;EGFR;ADCY5;GRIN2A;MAPK1;RICTOR;PIP5K1C;SPTBN1;SPTBN2;INSR;FN1;BRAF;GRIN2C;GRIN2B;PTK2;MTOR;GRIN1;TNRC6C;AGO3;DLG4;AGO1;CAMK4;AGO2;NF1;TNRC6B
Yellow	Reactome_2016.34	DAP12 interactions Homo sapiens R-HSA-2172127	63/359	1.24918e-07	3.79318e-06	2.22468	35.3627	GSK3B;PTEN;ARRB1;CASP9;SPRED2;SYNGAP1;RASGEF1A;AKT3;NEFL;PIP4K2B;PIP4K2C;SPTAN1;JAK1;PRKCG;ACTN2;PDPK1;PRKCE;PAQR3;TSC2;FRS2;PPP2R5D;KSR2;SPTB;CNKSR2;ADCY9;AKAP9;PSME4;KIT;RAPGEF2;PHLPP2;SHC3;PDE1B;PDE1A;CAMK2A;ITPR1;ADCY3;ADCY1;RASAL2;RASGRP1;EGFR;ADCY5;GRIN2A;MAPK1;RICTOR;PIP5K1C;SPTBN1;SPTBN2;INSR;FN1;BRAF;GRIN2C;GRIN2B;PTK2;MTOR;GRIN1;TNRC6C;AGO3;DLG4;AGO1;CAMK4;AGO2;NF1;TNRC6B
Yellow	Reactome_2016.35	Downregulation of SMAD2/3:SMAD4 transcriptional activity Homo sapiens R-HSA-2173795	12/23	1.25223e-07	3.79318e-06	11.2495	178.79	SMAD2;SKI;NCOR2;SMAD4;SMAD3;NCOR1;SMURF2;PARP1;USP9X;NEDD4L;TRIM33;RNF111
Yellow	Reactome_2016.36	CREB phosphorylation through the activation of Ras Homo sapiens R-HSA-442742	13/27	1.26439e-07	3.79318e-06	9.57928	152.153	PDPK1;ACTN2;CAMK2A;BRAF;GRIN2C;GRIN2B;GRIN1;RPS6KA3;GRIN2A;DLG4;AKAP9;NEFL;MAPK1
Yellow	Reactome_2016.37	RORA activates gene expression Homo sapiens R-HSA-1368082	13/27	1.26439e-07	3.79318e-06	9.57928	152.153	NCOA1;NCOA2;MED1;CREBBP;CHD9;NCOA6;NPAS2;ARNTL;HELZ2;NCOR1;CARM1;EP300;CLOCK
Yellow	DisGeNET.47	Aura	21/61	2.80119e-08	4.19361e-06	5.43287	94.481	CHRM2;OPRD1;CHRM1;SLC12A5;SLC1A1;SLC1A2;TSC2;TSC1;OPRM1;KCNAB2;GRIN2B;ERN1;STX1B;GRIN2A;SYNGAP1;SCN8A;KCNQ2;SCN2A;KCNH1;SCN1A;HCN1
Yellow	DisGeNET.48	Awakening Epilepsy	21/61	2.80119e-08	4.19361e-06	5.43287	94.481	CHRM2;OPRD1;CHRM1;SLC12A5;SLC1A1;SLC1A2;TSC2;TSC1;OPRM1;KCNAB2;GRIN2B;ERN1;STX1B;GRIN2A;SYNGAP1;SCN8A;KCNQ2;SCN2A;KCNH1;SCN1A;HCN1
Yellow	WikiPathways_2019_Human.6	Calcium Regulation in the Cardiac Cell WP536	35/149	7.21308e-08	4.412e-06	3.1896	52.4523	CHRM2;RYR2;CHRM1;CHRM4;CAMK2A;CACNA1B;ITPR1;CACNA1A;ATP2A2;ADCY3;CACNA1D;ARRB1;CACNA1C;ADCY1;PRKCZ;CACNA1E;ADRA1A;SLC8A1;RYR3;ADCY5;GRK5;RGS6;YWHAG;PRKCG;PRKCB;KCNB1;PRKCE;ATP2B2;ATP2B1;CACNB1;GNAO1;ADCY9;GNAQ;CAMK4;GNB1
Yellow	GO_Biological_Process_2018.25	regulation of dendrite development (GO:0050773)	16/37	3.00348e-08	4.44515e-06	7.87028	136.32	CAMK1D;CDKL5;DCC;NEDD4L;COBL;VLDLR;LRP8;CAMSAP2;HECW2;NEDD4;HECW1;CSMD3;TNIK;CPEB3;KIAA0319;PACSIN1
Yellow	WikiPathways_2019_Human.7	Pathways Affected in Adenoid Cystic Carcinoma WP3651	21/65	9.86429e-08	5.17171e-06	4.93788	79.6568	KDM6B;SETD2;CREBBP;SRCAP;FBXW7;PRKDC;KMT2C;MGA;MAGI2;ATRX;PTEN;JMJD1C;ARID1A;NCOR1;KANSL1;KAT6A;NSD1;EP300;TLK1;ATM;BCOR
Yellow	Reactome_2016.38	Rho GTPase cycle Homo sapiens R-HSA-194840	30/122	2.09229e-07	6.11169e-06	3.38213	52.0165	TRIO;ITSN1;ARHGAP39;KALRN;ARHGAP35;ARHGAP44;INPP5B;ABR;AKAP13;OPHN1;MCF2L;CHN1;SRGAP3;SRGAP2;ARHGEF11;ARHGEF12;ARHGEF17;OCRL;ARHGAP26;MYO9A;BCR;TIAM2;ARHGAP33;TIAM1;ARHGAP32;ARHGAP31;ARHGEF9;DLC1;ARHGEF3;ARHGEF2
Yellow	KEGG_2019_Human.5	Oxytocin signaling pathway	35/153	1.44997e-07	6.72323e-06	3.0808	48.5119	RYR2;PRKAA2;CAMK2A;ITPR1;ADCY3;CACNA1D;CACNA1C;ADCY1;RYR3;EGFR;ADCY5;CAMKK2;TRPM2;CACNG8;MAPK1;CACNG3;PRKCG;GUCY1A2;GUCY1A1;PRKAB2;KCNJ6;PPP1R12A;CAMK1D;PRKCB;CACNA2D3;CACNB1;GNAO1;CACNB2;ADCY9;CACNB4;GNAQ;CAMK4;PPP1R12B;PLCB1;CAMK1G
Yellow	KEGG_2019_Human.6	Calcium signaling pathway	40/188	1.56963e-07	6.72323e-06	2.81062	44.0348	CHRM2;RYR2;CHRM1;PDE1B;CHRNA7;PDE1A;CAMK2A;CACNA1B;ITPR1;CACNA1A;ATP2A2;ADCY3;CACNA1D;CACNA1C;ADCY1;CACNA1E;ADRA1A;SLC8A1;RYR3;EGFR;SLC8A2;HTR6;GRIN2A;GRM5;PTK2B;PRKCG;CAMK1D;PRKCB;ATP2B4;ATP2B2;ATP2B1;GRIN2C;GRIN1;ADCY9;GNAL;GNAQ;CAMK4;ORAI2;PLCB1;CAMK1G
Yellow	Reactome_2016.39	Circadian Clock Homo sapiens R-HSA-400253	20/63	2.74e-07	7.79845e-06	4.80964	72.6743	NCOA1;NCOA2;MED1;CREBBP;CRTC1;CHD9;NCOA6;NPAS2;ARNTL;HELZ2;PER2;RAI1;PER1;NCOR1;CARM1;CRY2;EP300;BTRC;CLOCK;MEF2D
Yellow	DisGeNET.49	Body mass index	65/370	7.59326e-08	1.0913e-05	2.22906	36.5419	KCNG3;LRGUK;HIP1;CRTC1;CELF1;ADARB1;JADE2;VIRMA;CMIP;HS6ST3;RPTOR;HERC4;ZNF169;RBFOX1;KCNH5;KLF13;ARL15;NCOA6;DCC;ZBTB38;VPS13C;CEP295;MAGI2;DNMT3A;FNDC3B;NAV1;SYN2;SREBF2;ETV5;DNM3;CACNB2;CLIP1;ADCY9;MRAS;RFX7;PSME4;MADD;CRY2;ADCY3;NRXN2;AKAP6;ADCY5;RAI1;SNX29;VPS53;HECTD4;ADAMTS17;HIVEP1;ZSWIM6;BPTF;PACSIN1;SRPK2;NTRK2;CADM2;INSR;ATP2B1;EFR3B;LRP1B;CORO7-PAM16;GNB1;DMXL2;INTS7;LPIN2;UNC79;TNRC6B
Yellow	DisGeNET.50	Finding of body mass index	65/370	7.59326e-08	1.0913e-05	2.22906	36.5419	KCNG3;LRGUK;HIP1;CRTC1;CELF1;ADARB1;JADE2;VIRMA;CMIP;HS6ST3;RPTOR;HERC4;ZNF169;RBFOX1;KCNH5;KLF13;ARL15;NCOA6;DCC;ZBTB38;VPS13C;CEP295;MAGI2;DNMT3A;FNDC3B;NAV1;SYN2;SREBF2;ETV5;DNM3;CACNB2;CLIP1;ADCY9;MRAS;RFX7;PSME4;MADD;CRY2;ADCY3;NRXN2;AKAP6;ADCY5;RAI1;SNX29;VPS53;HECTD4;ADAMTS17;HIVEP1;ZSWIM6;BPTF;PACSIN1;SRPK2;NTRK2;CADM2;INSR;ATP2B1;EFR3B;LRP1B;CORO7-PAM16;GNB1;DMXL2;INTS7;LPIN2;UNC79;TNRC6B
Yellow	DisGeNET.51	Birthmark	17/44	8.35669e-08	1.17747e-05	6.50546	106.023	KMT2D;CREBBP;PTEN;TSC2;TSC1;UBR1;CBL;MTOR;MED12;SLX4;SIN3A;NF1;EP300;KIF1B;ATM;PCNT;MEN1
Yellow	DisGeNET.52	Impaired cognition	101/671	9.26756e-08	1.28071e-05	1.86512	30.2041	APP;DCLRE1C;CLSTN2;CRTC1;CTNND2;RPS6KA3;SMCHD1;OPHN1;EP300;GTF2I;SCN1A;MEF2A;SRRM2;CDKL5;MAGI2;DYRK1A;ADAM10;TSC2;OCRL;TSC1;ANK3;MAPK8IP2;FOXP1;SCN8A;KCNQ2;AMPH;ASTN2;UTRN;CLOCK;PRKDC;CHRNA4;ANKRD11;FOXG1;CHRNA7;ITPR1;SLC1A2;CACNA1A;CACNA1C;ATXN1;MAP2;SPTBN1;SPTBN2;SRPK2;CREBBP;HOMER2;INSR;BRAF;GRIN2B;DCLK1;BMP2;SYNJ1;DLG4;NF1;UBA1;SCN2A;SNAP25;RYR2;GSK3B;CELF1;LRRK2;PTEN;LAMC2;MTR;VLDLR;AFF4;PPP…
Yellow	DisGeNET.53	Open mouth (finding)	21/65	9.86429e-08	1.33745e-05	4.93788	79.6568	KCNJ6;MBD5;DST;IQSEC2;STRADA;PDE4D;ATRX;VPS13B;PPP2R5D;BRAF;BICD2;FOXP1;MED13L;MED12;UNC80;RPS6KA3;RAI1;KANSL1;SIN3A;KIF1A;SOX5
Yellow	KEGG_2019_Human.7	Cholinergic synapse	28/112	3.65139e-07	1.34058e-05	3.45486	51.2113	CHRM2;CHRM1;CHRNA4;CHRM4;CHRNA7;CAMK2A;CACNA1B;ITPR1;CACNA1A;ADCY3;CACNA1D;CACNA1C;ADCY1;ADCY5;AKT3;MAPK1;PRKCG;KCNJ6;PRKCB;GNAO1;ADCY9;GNAQ;CAMK4;KCNQ2;GNB1;KCNQ3;KCNQ5;PLCB1
Yellow	GO_Biological_Process_2018.26	neuron development (GO:0048666)	34/144	9.65646e-08	1.37419e-05	3.21001	51.8514	RB1;APP;TENM1;GSK3B;ATP8A2;TENM3;TENM4;MYT1L;SRF;FRY;PPP1R9A;HS6ST1;CAMSAP1;PPP1R9B;MAPK9;MAPK8;OPHN1;MAP2;SH3GL2;EPHA5;NTRK2;ETV1;L1CAM;CCSAP;UHMK1;SKI;MAPK10;NEDD4;CDH11;TBC1D24;RAPGEF2;CNTN4;MAPRE2;FRYL
Yellow	WikiPathways_2019_Human.8	Phosphodiesterases in neuronal function WP4222	18/53	3.44645e-07	1.49374e-05	5.31438	79.082	GRIA1;GUCY1A2;GUCY1A1;PDE1B;PDE4D;CHRNA7;PDE1A;PDE2A;ADCY3;ADCY1;GRIN2C;GRIN2B;ADCY5;GRIN1;GRIN2A;ADCY9;PDE10A;PDE4A
Yellow	WikiPathways_2019_Human.9	Circadian rhythm related genes WP3594	41/201	3.66312e-07	1.49374e-05	2.66459	39.4886	GSK3B;CHRM1;PRKAA2;KMT2A;PRKDC;DHX9;CRTC1;PTEN;ADCY1;AHR;TNFRSF11A;NPAS2;ARNTL;RAI1;MAPK9;MAPK8;SIN3A;ADORA1;EP300;BTRC;PRKCG;NCOA2;ARNT2;EGR3;HOMER1;KCND2;NTRK3;GFPT1;DYRK1A;SETX;PER2;MAPK10;PER1;NCOR1;THRAP3;GNAQ;KCNMA1;CRY2;KLF9;CLOCK;OGT
Yellow	DisGeNET.54	Cafe-au-Lait Spots	17/45	1.23208e-07	1.63958e-05	6.27278	99.796	KMT2D;CREBBP;PTEN;TSC2;TSC1;UBR1;CBL;MTOR;MED12;SLX4;SIN3A;NF1;EP300;KIF1B;ATM;PCNT;MEN1
Yellow	DisGeNET.55	Clinodactyly of the 5th finger	36/159	1.27366e-07	1.65889e-05	3.04091	48.2781	RB1;HDAC4;SETD5;KMT2A;SRCAP;FOXG1;STXBP1;ANKRD11;XYLT1;UBE3B;UBR1;MECP2;RAI1;NIPBL;EP300;MAPK1;PCNT;GTF2I;EVC2;GABBR2;CREBBP;MBD5;CDKL5;IQSEC2;VPS13B;BRAF;KCNAB2;L1CAM;BCR;SKI;BMP2;KAT6B;SPECC1L;BCOR;ZFPM2;SHANK3
Yellow	DisGeNET.56	Ataxia	43/208	1.29276e-07	1.65889e-05	2.71226	43.0199	SNAP25;TRIO;KCNC1;PRKDC;KCNC3;KCNA1;KCNA2;SEL1L;KCNA3;ITPR1;CACNA1A;ATP1A3;LAMC2;PRICKLE1;FBXO41;TTBK2;SYNE1;MECP2;GRIN2A;ATXN2;ATXN1;OPHN1;OPA1;SACS;KCNN3;SPTBN1;RGS6;SCN1A;SPTBN2;PRKCG;SMAD2;GRID2;EGR3;GABRA4;MARS2;ANK1;GRIN2B;SETX;CACNB4;SCN8A;CCDC6;ATM;HCN1
Yellow	DisGeNET.57	Tonic - clonic seizures	38/173	1.33704e-07	1.68561e-05	2.92595	46.3109	CHRM1;CHRNA4;CHRNA7;FOXG1;STXBP1;SLC1A1;KCNA2;CACNA1D;SLC8A1;GPHN;MECP2;CNR1;SLC17A7;MPDZ;SCN1A;RBFOX1;CDKL5;SLC12A5;ABCC8;TSC2;TSC1;OPRM1;ADRA2B;SYN2;DNM1;MIB1;LETM1;MAPK10;STX1B;NR4A3;SYNJ1;SCN8A;KCNQ2;GNB1;KCNMA1;KCNQ3;SCN2A;HCN1
Yellow	GO_Biological_Process_2018.27	regulation of synaptic transmission, glutamatergic (GO:0051966)	17/45	1.23208e-07	1.68841e-05	6.27278	99.796	NLGN3;NLGN2;UNC13A;SYT1;LRRK2;GRIK3;MAPK8IP2;GRM3;GRM2;CACNG8;GRM5;OPHN1;PTK2B;CACNG3;SHANK3;SHANK2;SHANK1
Yellow	DisGeNET.58	Obsessive-Compulsive Disorder	29/114	1.51903e-07	1.88203e-05	3.53797	55.5463	NPSR1;SETD5;TRIO;KMT2A;SLC1A1;HTT;LAMC2;SEMA3E;CACNA1C;CDH9;RYR3;AFF2;MECP2;MED12;NIPBL;SLITRK1;DLGAP3;GRIA3;GTF2I;NTRK2;GABBR1;NTRK3;OCRL;OPRM1;GRIN2B;TTC19;DNM3;DLG4;SHANK3
Yellow	WikiPathways_2019_Human.10	EGF/EGFR Signaling Pathway WP437	35/162	6.25328e-07	2.29495e-05	2.86105	40.8701	USP6NL;PTPRR;STXBP1;CAMK2A;PTEN;AP2A1;ASAP1;CBL;PRKCZ;EGFR;RPS6KA3;MAPK9;ATXN2;MAPK8;E2F1;PTK2B;MAPK1;RICTOR;MEF2D;MAP3K4;SH3GL2;JAK1;MEF2A;USP8;PRKCB;IQSEC1;PDPK1;BRAF;AP2B1;PTK2;DNM1;MTOR;SYNJ1;NEDD4;PXDN
Yellow	Reactome_2016.40	Signaling by ERBB4 Homo sapiens R-HSA-1236394	57/330	8.34829e-07	2.31665e-05	2.17757	30.4773	GSK3B;PTEN;ARRB1;CASP9;SPRED2;SYNGAP1;RASGEF1A;AKT3;NEFL;PIP4K2B;PIP4K2C;BTRC;SPTAN1;JAK1;ACTN2;PDPK1;PAQR3;TSC2;FRS2;PPP2R5D;KSR2;SPTB;CNKSR2;NCOR1;AKAP9;PSME4;KIT;RAPGEF2;PGR;PHLPP2;SHC3;CAMK2A;RASAL2;RASGRP1;EGFR;GRIN2A;MAPK1;RICTOR;PIP5K1C;SPTBN1;SPTBN2;INSR;FN1;BRAF;GRIN2C;GRIN2B;PTK2;MTOR;GRIN1;TNRC6C;AGO3;DLG4;AGO1;NEDD4;AGO2;NF1;TNRC6B
Yellow	GO_Biological_Process_2018.28	positive regulation of transcription, DNA-templated (GO:0045893)	150/1120	1.78201e-07	2.35481e-05	1.63872	25.4663	RB1;APP;CCNT2;ICE1;CRTC1;MAML1;PRDM2;AHR;RBPJ;DCAF6;GRIP1;RPS6KA3;ZNF609;ZMIZ1;ZMIZ2;EP300;KAT7;BTRC;RNF111;MAP3K5;MEN1;MEF2A;DDX17;SMARCC1;SMARCC2;ZBTB38;HCFC1;KAT6B;KAT6A;ZNF318;PGR;ZFPM2;ATF6;CLOCK;ZNF398;KMT2E;KMT2D;KMT2A;DHX9;PRKDC;TNKS;KMT2B;NPAS2;HELZ2;RAI1;HIVEP3;CAMTA2;PPARGC1B;BCL9L;BPTF;SMAD2;CREBBP;SMAD4;BRPF1;SMAD3;POU2F1;BCL11B;ZBTB16;SUPT5H;BTBD8;TRERF1;SETX;NR4A2;BMP2;NR4A3;AGO1;A…
Yellow	KEGG_2019_Human.8	Nicotine addiction	15/40	7.60724e-07	2.37699e-05	6.19297	87.2527	GRIA1;GABRB2;GABRB1;CHRNA4;CHRNA7;GABRA4;CACNA1B;CACNA1A;GRIN2C;GABRG3;GRIN2B;GRIN1;GRIN2A;SLC17A7;GRIA3
Yellow	KEGG_2019_Human.9	Long-term potentiation	20/67	8.32408e-07	2.37699e-05	4.39934	61.5861	PRKCG;GRIA1;CREBBP;PRKCB;CAMK2A;ITPR1;BRAF;ADCY1;CACNA1C;GRIN2C;GRIN2B;GRIN1;RPS6KA3;GRM5;GRIN2A;CAMK4;GNAQ;EP300;MAPK1;PLCB1
Yellow	KEGG_2019_Human.10	Type II diabetes mellitus	16/46	1.06723e-06	2.51145e-05	5.50647	75.7164	ABCC8;INSR;PRKCE;CACNA1B;CACNA1A;CACNA1D;CACNA1C;PRKCZ;CACNA1E;MTOR;HK1;MAPK10;MAPK9;MAPK8;HKDC1;MAPK1
Yellow	KEGG_2019_Human.11	Dopaminergic synapse	30/131	1.07494e-06	2.51145e-05	3.07922	42.3185	GRIA1;GSK3B;CAMK2A;CACNA1B;ITPR1;CACNA1A;CACNA1D;CACNA1C;ADCY5;ARNTL;MAPK9;GRIN2A;MAPK8;KIF5C;AKT3;GRIA3;SCN1A;PRKCG;KCNJ6;PRKCB;PPP2R5D;GRIN2B;GNAO1;MAPK10;GNAL;PPP2R2C;GNAQ;GNB1;PLCB1;CLOCK
Yellow	DisGeNET.59	Tremor	45/226	2.09256e-07	2.54866e-05	2.58819	39.8056	KCNC1;NUFIP2;DCTN1;STXBP1;KCNA1;CHRM4;CTNND2;LRRK2;KCNA2;KCNA3;ITPR1;CACNA1A;SLC35F1;PRICKLE1;LYST;ARNTL;CABIN1;MECP2;OPA1;MCF2L;ADORA1;TRAPPC11;RGS6;SCN1A;GTF2I;MEN1;LINGO1;GABBR1;SLC6A17;VPS13A;MYO5A;DNAJC13;ADRA2B;TTC19;ANO3;SETX;GAK;GNAL;SYNJ1;DNAJC6;SCN8A;ATM;ERCC6;SCN2A;HCN1
Yellow	DisGeNET.60	Nasal bridge wide	59/333	2.22223e-07	2.66149e-05	2.24823	34.442	RB1;IFT172;CTNND2;SLC7A14;JMJD1C;MED12;GRIP1;SYNGAP1;ADAMTS3;SIN3A;EP300;SLC12A6;ARID2;SCAPER;SOX5;GTF2I;KCNH1;HGSNAT;IFT140;VPS33A;PDE4D;MARS2;ATRX;CASK;KCNAB2;ARID1A;ARID1B;SPECC1L;SNRNP200;SHANK3;KMT2D;SRCAP;ANKRD11;PRPF8;NALCN;RAI1;ANKH;NSD2;KIAA0753;HIVEP2;PCNT;CREBBP;BRPF1;IQSEC2;USP9X;BRAF;MERTK;GATAD2B;LETM1;SKI;ASXL1;SON;FRAS1;RAB3GAP2;TUBGCP6;UBA1;REEP6;ERCC6;CDK13
Yellow	Reactome_2016.41	CREB phosphorylation through the activation of CaMKII Homo sapiens R-HSA-442729	9/15	1.03675e-06	2.80681e-05	15.446	212.837	GRIN2A;ACTN2;DLG4;CAMK2A;AKAP9;NEFL;GRIN2C;GRIN2B;GRIN1
Yellow	DisGeNET.61	Major Depressive Disorder	81/513	2.42311e-07	2.85451e-05	1.9656	29.9421	CHRM2;SNAP25;APP;GSK3B;PTPRR;MYT1L;CRTC1;NCAN;CTNND2;RAPH1;GRIK3;ARRB1;LAMC2;ADARB1;VLDLR;ADRA1A;PPP1R9B;MECP2;MED12;GRM3;GRM2;GRM5;PCLO;KHSRP;NEFL;PDE4A;USP46;DST;PRKCB;ANK3;OPRM1;ADRA2B;CIT;BCR;NUP98;PLCB1;CLOCK;GRIA1;HLF;LRP1;CHRNA4;CHRNA7;SLC1A1;CAMK2A;SLC1A2;ADCY3;HTT;CACNA1C;LRP8;KALRN;EGFR;NPAS2;ADCY5;GRIN2A;GRK5;MAP2;CNR1;CMYA5;MAPK1;SLC17A7;SLIT3;TPPP;PCNT;WASF3;ATF7IP;NTRK2;GABBR2;GABBR…
Yellow	DisGeNET.62	Curvature of little finger	35/157	2.82668e-07	3.27621e-05	2.97913	44.9223	RB1;HDAC4;SETD5;KMT2A;SRCAP;FOXG1;STXBP1;XYLT1;UBE3B;UBR1;MECP2;RAI1;NIPBL;EP300;MAPK1;PCNT;GTF2I;EVC2;GABBR2;CREBBP;MBD5;CDKL5;IQSEC2;VPS13B;BRAF;KCNAB2;L1CAM;BCR;SKI;BMP2;KAT6B;SPECC1L;BCOR;ZFPM2;SHANK3
Yellow	Reactome_2016.42	Dopamine Neurotransmitter Release Cycle Homo sapiens R-HSA-212676	11/23	1.31137e-06	3.43339e-05	9.4468	127.952	SNAP25;RIMS1;SYT1;STXBP1;CASK;LIN7A;APBA1;SYN3;SYN2;SYN1;PPFIA3
Yellow	Reactome_2016.43	Role of Abl in Robo-Slit signaling Homo sapiens R-HSA-428890	7/9	1.33005e-06	3.43339e-05	36.0079	487.198	CAP1;ABL2;SLIT2;CLASP1;CAP2;CLASP2;ROBO1
Yellow	DisGeNET.63	Mental disorders	58/329	3.33876e-07	3.8083e-05	2.23367	33.3096	CHRM2;GABRB2;GSK3B;SNAP25;CHRM4;CTNND2;LRRK2;PTEN;ADARB1;LDLRAD4;VLDLR;PHF8;MECP2;MED12;GRM5;PCLO;NRCAM;NCOA6;DYRK1A;ANK3;OPRM1;CACNB2;SCN8A;NOS1AP;NUP98;CLOCK;SHANK3;GRIA1;NUFIP2;CHRNA4;PLPPR4;CHRNA7;SLC1A1;KCNA3;HTT;TMTC1;CACNA1C;NALCN;RAI1;GRIN2A;SRR;ATXN1;CNR1;SLITRK1;PLXNA2;MAPK1;PCNT;CSMD1;MARK1;NTRK2;EGR3;GPR52;GRIN2B;DCLK1;GRIN1;BCL9;DLG4;PI4KA
Yellow	DisGeNET.64	Aggressive behavior	28/112	3.65139e-07	4.09983e-05	3.45486	51.2113	SETD2;TRIO;KMT2A;MYT1L;AFF2;MED12;NDST1;SYNGAP1;HERC2;SIN3A;SLITRK1;GRIA3;SCN1A;MBD5;SLC6A17;VPS13A;OCRL;ANK3;ARID1B;TTC19;DNM1;SYN1;FOXP1;MAPK10;PACS1;TBC1D24;BCOR;ZMYND11
Yellow	KEGG_2019_Human.12	Autophagy	29/128	2.03654e-06	4.21282e-05	3.03531	39.7755	MTMR3;PRKAA2;ITPR1;PTEN;AMBRA1;MTMR4;CAMKK2;RPTOR;MAPK9;MAPK8;DEPTOR;AKT3;MAPK1;UVRAG;RUBCN;DAPK1;PDPK1;TSC2;TSC1;EIF2AK4;ATG13;MTOR;ERN1;MAPK10;MRAS;ATG2A;ULK2;PIK3C3;ATG2B
Yellow	KEGG_2019_Human.13	GABAergic synapse	23/89	2.131e-06	4.21282e-05	3.60518	47.0798	NSF;PRKCG;GABRB2;GABBR2;GABRB1;KCNJ6;GABBR1;SLC12A5;PRKCB;GABRA4;CACNA1B;ADCY3;CACNA1A;CACNA1D;ADCY1;CACNA1C;GABRG3;GPHN;GLS;ADCY5;GNAO1;ADCY9;GNB1
Yellow	WikiPathways_2019_Human.11	G Protein Signaling Pathways WP35	24/93	1.32466e-06	4.41956e-05	3.59982	48.7213	PRKCG;PRKCB;PDE1B;PDE4D;PRKCE;PDE1A;ITPR1;ADCY3;AKAP6;ADCY1;AKAP5;PRKCZ;AKAP1;ADCY5;GNAO1;AKAP13;AKAP10;AKAP11;ADCY9;GNAL;GNAQ;AKAP9;GNB1;PDE4A
Yellow	Reactome_2016.44	Membrane Trafficking Homo sapiens R-HSA-199991	67/420	1.8193e-06	4.58959e-05	1.98221	26.199	USP6NL;APP;CLTC;ARRB1;MIA3;BICD2;GOLGA4;PPP6R1;AP1G1;KIF5C;MAN1A2;KIF1B;MAN1A1;KIF21B;KIF1A;SPTAN1;SH3GL2;YWHAG;NSF;PRKAB2;COG5;COG1;ANK2;OCRL;ANK3;SPTB;ANK1;DNM1;GAK;F8;RALGAPB;KIFC2;DNAJC6;EXOC4;GRIA1;NAPB;COPA;PRKAA2;DCTN1;KLC2;KIF3B;MAN2A2;MAN2A1;VPS53;VTI1A;KIF3C;RAB6B;SPTBN1;SEC31A;SPTBN2;DYNC1H1;RIC1;SORT1;TRAPPC10;SEC16A;GBF1;MYO5A;LNPEP;PUM1;RAB10;TJP1;GOLGB1;KIF26B;TRIP11;RAB3GAP2;COPG1…
Yellow	DisGeNET.65	Depressed nasal bridge	51/277	4.35765e-07	4.81755e-05	2.3515	34.4405	SMARCAL1;SETD5;PTEN;XYLT1;MECP2;MED12;RPS6KA3;GRIP1;NIPBL;PCLO;ADAMTS3;GNPTAB;SIN3A;AKT3;ARID2;SOX5;KCNH1;PDE4D;MARS2;ATRX;KCNAB2;ARID1A;ARID1B;PREPL;SETBP1;HECW2;SPECC1L;CDH11;HDAC4;KMT2A;FOXG1;ATP1A3;SEMA3E;CACNA1C;CBL;RAI1;ANKH;EXTL3;IQSEC2;USP9X;INSR;AGL;BRAF;MTOR;MED13L;SKI;SON;FRAS1;NF1;TRIP11;RAB3GAP2
Yellow	DisGeNET.66	Generalized seizures	30/126	4.43693e-07	4.83088e-05	3.24049	47.4023	CHRM1;CHRNA4;CTNND2;CHRNA7;FOXG1;SLC1A1;KCNA2;SLC8A1;MECP2;CNR1;SLC17A7;MPDZ;SCN1A;RBFOX1;CDKL5;PRRT2;SLC12A5;KCNB1;TSC2;TSC1;OPRM1;ADRA2B;SYN2;MIB1;LETM1;SYNJ1;SCN8A;KCNQ2;PLCB1;HCN1
Yellow	DisGeNET.67	Epilepsy, Temporal Lobe	38/181	4.53655e-07	4.86561e-05	2.76104	40.3276	GRIA1;GABRB2;KCNA1;SLC1A1;SLC1A2;KCNA3;CACNA1A;PRICKLE1;GPHN;ADD1;GRM3;GRM2;GRIN2A;GRM5;MAP2;CNR1;SLIT2;GRIA3;SCN1A;NSF;NTRK2;GABBR2;RBFOX1;GABBR1;SLC12A5;KCND2;DAPK1;VPS13A;MAPK8IP3;GRIN2B;MTOR;GRIN1;LETM1;DLG4;KCNQ3;TLN2;SCN2A;HCN1
Yellow	GO_Biological_Process_2018.29	long-term synaptic potentiation (GO:0060291)	11/21	4.04624e-07	5.16245e-05	11.3374	166.89	SLC24A2;GRIN2A;PLK2;PTK2B;GRIN2C;PRKCZ;GRIN2B;SHANK3;SHANK2;SLC8A2;SHANK1
Yellow	KEGG_2019_Human.14	Adherens junction	20/72	2.90652e-06	5.33554e-05	3.97523	50.6785	FARP2;SMAD2;CREBBP;SMAD4;SMAD3;ACTN1;INSR;PTPRJ;LMO7;WASL;SORBS1;NLK;PTPRF;EGFR;TJP1;AFDN;PTPRB;EP300;MAPK1;WASF3
Yellow	DisGeNET.68	Mild Mental Retardation	33/147	5.16981e-07	5.46327e-05	3.00389	43.4821	TRIO;CHRNA4;CTNND2;PTEN;JMJD1C;ATP2A2;AFF2;PHF8;MECP2;RPS6KA3;RAI1;SIN3A;EP300;DLAT;SPTBN2;SMAD3;AGL;ATRX;HUWE1;ARID1B;MCM3AP;CLCN4;DLG3;CDH11;TBC1D24;NF1;DCX;RAB3GAP2;BCOR;ZMYND11;SHANK3;SHANK2;SHANK1
Yellow	DisGeNET.69	Ataxia, Truncal	16/44	5.32538e-07	5.54612e-05	5.90044	85.2354	GRID2;ATP8A2;EGR3;KCND3;COG5;GABRA4;ATP1A3;CACNA1A;SYT14;VLDLR;MECP2;ATXN1;CACNB4;SCN8A;SPTBN2;HCN1
Yellow	GO_Biological_Process_2018.30	protein localization to membrane (GO:0072657)	35/160	4.57551e-07	5.55962e-05	2.90715	42.4367	NLGN2;STXBP1;NRXN2;LIN7A;DPP6;TSPAN5;SPTBN1;PACSIN1;CLASP2;NUP155;ACTN2;KCNB1;KCNB2;MAGI2;TTC7B;MYO5A;ANK2;BRAF;ANK3;ANK1;EFR3B;GAK;RAB10;CACNB2;EHD3;DLG2;DLG3;DLG4;PACS1;SLMAP;WNK3;RAPGEF2;TNIK;RAPGEF6;SHANK3
Yellow	GO_Biological_Process_2018.31	action potential (GO:0001508)	18/54	4.74205e-07	5.55962e-05	5.16648	75.2323	KCND2;CHRNA4;KCNB1;KCNA1;KCNA2;CACNA1B;CACNA1A;AKAP6;CACNA1D;ANK3;CACNA1C;NALCN;CACNA1E;SCN8A;GNAQ;SCN2A;SCN3A;SCN1A
Yellow	GO_Biological_Process_2018.32	regulation of transcription from RNA polymerase II promoter (GO:0006357)	186/1478	4.80832e-07	5.55962e-05	1.53096	22.272	RB1;SMARCAL1;APP;CCNT2;ZNF174;CRTC1;MAML1;MYT1L;WWC2;PRDM2;AHR;RBPJ;ARHGAP35;DCAF6;YY1;RPS6KA3;ZNF609;ZNF608;ZMIZ1;ZMIZ2;SAP130;EP300;KAT7;RNF111;GTF2I;MEN1;MEF2A;DDX17;SMARCC1;SMARCC2;PRKCB;ZBTB38;DICER1;FOXP1;HCFC1;RFX7;DGKQ;PGR;ZNF831;ZFPM2;ATF6;CLOCK;ZFPM1;KMT2D;KMT2A;SRCAP;DHX9;PRKDC;TNKS;FOXG1;NEDD4L;NPAS2;MED12L;HELZ2;RAI1;ZNF704;TPR;HIVEP1;CAMTA2;ZBED6;PPARGC1B;BCL9L;BPTF;SMAD2;CREBBP;SMA…
Yellow	GO_Biological_Process_2018.33	regulation of small GTPase mediated signal transduction (GO:0051056)	32/140	4.98828e-07	5.59292e-05	3.07395	44.6061	TRIO;ITSN1;ARHGAP39;KALRN;ARHGAP35;ARHGAP44;INPP5B;ABR;ARHGAP21;AKAP13;OPHN1;MCF2L;CHN1;SRGAP3;SLIT2;SRGAP2;ARHGEF11;ARHGEF12;ARHGEF17;OCRL;ARHGAP26;MYO9A;BCR;TIAM2;ARHGAP33;TIAM1;ARHGAP32;ARHGAP31;ARHGEF9;DLC1;ARHGEF3;ARHGEF2
Yellow	DisGeNET.70	Dilated ventricles (finding)	41/204	5.52994e-07	5.67688e-05	2.61511	37.6783	KMT2D;SETD2;FOXG1;STXBP1;ANKRD11;ATP1A3;CHD4;MECP2;MED12;RPS6KA3;RAI1;HERC2;RNF213;HERC1;SIN3A;NSD1;AKT3;NSD2;KIAA0753;ZSWIM6;KIF1A;SLC12A6;APC2;GABBR2;CDKL5;IQSEC2;STRADA;VPS13A;OCRL;PPP2R5D;KCNAB2;L1CAM;CIT;LETM1;SKI;ARHGAP31;SON;SETBP1;CCDC88C;SPECC1L;ASXL2
Yellow	DisGeNET.71	Physical aggression	27/108	5.8693e-07	5.90548e-05	3.45346	49.5514	SETD2;TRIO;KMT2A;MYT1L;AFF2;MED12;NDST1;HERC2;SIN3A;SLITRK1;GRIA3;SCN1A;MBD5;SLC6A17;VPS13A;OCRL;ANK3;ARID1B;TTC19;DNM1;SYN1;FOXP1;MAPK10;PACS1;TBC1D24;BCOR;ZMYND11
Yellow	DisGeNET.72	Long philtrum	39/190	5.91698e-07	5.90548e-05	2.68392	38.4882	ATP6V1A;SETD5;KMT2A;FOXG1;STXBP1;ANKRD11;PTEN;XYLT1;JMJD1C;CBL;NALCN;MECP2;MED12;NIPBL;PCLO;GNPTAB;SIN3A;NSD1;GTF2I;KCNH1;GABBR2;CDKL5;BRPF1;SLC6A17;ABCC8;USP9X;MARS2;CASK;BRAF;KCNAB2;MTOR;SKI;KAT6B;SPECC1L;TRIP11;UBA1;ERCC6;BCOR;SHANK3
Yellow	DisGeNET.73	Alcoholic Intoxication, Chronic	69/424	6.11539e-07	6.01989e-05	2.03203	29.0728	PHF3;CHRM2;GABRB2;SETD5;GABRB1;GRIK3;CHM;CDH9;CDH8;GPHN;ZCCHC14;GRM3;GRM2;GRM5;EP300;PKNOX2;MBNL2;DST;SGIP1;ARL15;NCOA6;OPRM1;GABRG3;CDH11;CLOCK;ANAPC1;ASTN1;NPSR1;OPRD1;PCDH10;CHRNA4;SEMA3A;CAMK2A;SLC1A2;HTT;ADCY1;LRP8;EGFR;ADCY5;GRIN2A;GRK5;CNR1;PTK2B;MAPK1;UTP20;KCNN3;MPDZ;MARK1;NTRK2;ARFGEF2;KCNJ6;GABBR1;HOMER1;NRDC;FN1;AP2B1;GRIN2C;GRIN2B;GRIN1;NR4A2;PER1;PDE10A;AGO1;CAMK4;AGO2;NF1;CNTN4;ALL…
Yellow	DisGeNET.74	Movement Disorders	36/169	6.24117e-07	6.06068e-05	2.81072	40.1565	FOXG1;STXBP1;LRRK2;KCNA1;ITPR1;CACNA1A;ATP1A3;HTT;LAMC2;SLC2A3;TTBK2;ADCY5;MECP2;JPH3;CNR1;TRAPPC11;KIF1A;SCN1A;GABBR2;LINGO1;CDKL5;UNC13A;PRRT2;TET2;MYO5A;OPRM1;GRIN2B;GRIN1;GNAO1;GNAL;PDE10A;ALS2;SCN8A;KCNQ2;KCNMA1;OGDH
Yellow	Reactome_2016.45	Signaling by SCF-KIT Homo sapiens R-HSA-1433557	55/325	2.47315e-06	6.10043e-05	2.1224	27.4002	GSK3B;PTEN;ARRB1;CASP9;SPRED2;SYNGAP1;RASGEF1A;AKT3;NEFL;PIP4K2B;PIP4K2C;SPTAN1;JAK1;ACTN2;PDPK1;PAQR3;TSC2;FRS2;PPP2R5D;KSR2;SPTB;CNKSR2;AKAP9;PSME4;KIT;RAPGEF2;PHLPP2;SHC3;CAMK2A;RASAL2;CBL;RASGRP1;EGFR;GRIN2A;MAPK1;RICTOR;PIP5K1C;SH2B3;SPTBN1;SPTBN2;INSR;FN1;BRAF;GRIN2C;GRIN2B;PTK2;MTOR;GRIN1;TNRC6C;AGO3;DLG4;AGO1;AGO2;NF1;TNRC6B
Yellow	Reactome_2016.46	Regulation of lipid metabolism by Peroxisome proliferator-activated receptor alpha (PPARalpha) Homo sapiens R-HSA-400206	27/116	2.62235e-06	6.32785e-05	3.14165	40.3747	CHD9;MED15;NPAS2;ARNTL;HELZ2;MED12;MED14;MED13;SIN3A;EP300;PPARGC1B;NCOA1;MED1;NCOA2;CREBBP;ACSL1;NCOA6;SREBF2;MED13L;TIAM2;NCOR2;MED24;NCOR1;MTF1;CARM1;RGL1;CLOCK
Yellow	KEGG_2019_Human.15	cAMP signaling pathway	40/212	3.96931e-06	6.80075e-05	2.41523	30.0381	CHRM2;GRIA1;RYR2;CHRM1;CAMK2A;ADCY3;ATP2A2;ATP1A3;CACNA1D;ADCY1;CACNA1C;ADCY5;MAPK9;HTR6;GRIN2A;MAPK8;AKT3;ADORA1;EP300;PDE4A;MAPK1;GRIA3;GABBR2;CREBBP;GABBR1;PPP1R12A;PDE4D;ATP2B4;BRAF;ATP2B2;ATP2B1;GRIN2C;GRIN2B;GRIN1;MAPK10;TIAM1;AFDN;ADCY9;PDE10A;CAMK4
Yellow	DisGeNET.75	Hyperactive behavior	102/709	7.23273e-07	6.92992e-05	1.76612	24.972	APP;ADARB1;AHR;GLS;RPS6KA3;HTR6;HERC2;OPHN1;EP300;TRAPPC11;RGS6;SCN1A;MED1;USP8;KIRREL2;DAPK1;DYRK1A;TSC2;TSC1;ANK3;FOXP1;BCR;SCN8A;ZNF436;NUP98;TNIK;GRIA1;COPA;KMT2A;TNFRSF11A;RAI1;ATXN2;GRK5;MAP6;HIVEP2;SMAD2;CREBBP;SMAD4;PRRT2;SMAD3;IQSEC2;SYT1;CADM2;MYO5A;BRAF;NR4A2;NF1;ATM;SNAP25;RYR2;LRRK2;PTEN;PKD1;OSBPL10;AFF2;HK1;MECP2;MED12;GRM5;SIN3A;DNM1L;GIT1;APC2;CAP1;HGSNAT;PARP1;ABCC8;PDE4D;ATRX;V…
Yellow	DisGeNET.76	Muscle hypotonia	73/460	7.77843e-07	7.35471e-05	1.97315	27.7558	RB1;SETD2;CNTNAP1;ATP8A2;CTNND2;JMJD1C;VLDLR;MECP2;MED12;RPS6KA3;SYNGAP1;OPHN1;SIN3A;EPG5;EP300;ARID2;GTF2I;SCN1A;SOX5;APC2;RUBCN;CDKL5;IFT140;COG5;ATRX;VPS13A;VPS13B;COG1;KCNAB2;ARID1A;ARID1B;DNM1;PREPL;KAT6B;COL4A1;KAT6A;SCN8A;KCNQ2;KCNQ3;DCX;FAN1;HDAC4;KMT2D;CEP104;ZNF592;FOXG1;STXBP1;ITPR1;MLLT1;SEMA3E;RAI1;NSD1;NSD2;DYNC1H1;CREBBP;MBD5;HACE1;PRRT2;IQSEC2;GFPT1;MYO5A;BRAF;CPLANE1;LETM1;SKI;TB…
Yellow	Reactome_2016.47	Neurofascin interactions Homo sapiens R-HSA-447043	6/7	3.16826e-06	7.48249e-05	61.6964	781.22	NFASC;CNTNAP1;DCX;CNTN1;NRCAM;ANK1
Yellow	DisGeNET.77	Concave bridge of nose	50/275	8.30554e-07	7.51514e-05	2.31443	32.4047	SMARCAL1;SETD5;PTEN;XYLT1;MECP2;MED12;RPS6KA3;GRIP1;NIPBL;PCLO;ADAMTS3;GNPTAB;SIN3A;AKT3;ARID2;SOX5;KCNH1;PDE4D;MARS2;ATRX;KCNAB2;ARID1A;ARID1B;PREPL;SETBP1;HECW2;SPECC1L;CDH11;HDAC4;KMT2A;FOXG1;SEMA3E;CACNA1C;CBL;RAI1;ANKH;EXTL3;IQSEC2;USP9X;INSR;AGL;BRAF;MTOR;MED13L;SKI;SON;FRAS1;NF1;TRIP11;RAB3GAP2
Yellow	DisGeNET.78	Depressed nasal root/bridge	50/275	8.30554e-07	7.51514e-05	2.31443	32.4047	SMARCAL1;SETD5;PTEN;XYLT1;MECP2;MED12;RPS6KA3;GRIP1;NIPBL;PCLO;ADAMTS3;GNPTAB;SIN3A;AKT3;ARID2;SOX5;KCNH1;PDE4D;MARS2;ATRX;KCNAB2;ARID1A;ARID1B;PREPL;SETBP1;HECW2;SPECC1L;CDH11;HDAC4;KMT2A;FOXG1;SEMA3E;CACNA1C;CBL;RAI1;ANKH;EXTL3;IQSEC2;USP9X;INSR;AGL;BRAF;MTOR;MED13L;SKI;SON;FRAS1;NF1;TRIP11;RAB3GAP2
Yellow	DisGeNET.79	Broad flat nasal bridge	57/330	8.34829e-07	7.51514e-05	2.17757	30.4773	RB1;IFT172;CTNND2;SLC7A14;JMJD1C;MED12;GRIP1;ADAMTS3;SIN3A;EP300;SLC12A6;ARID2;SCAPER;SOX5;GTF2I;KCNH1;HGSNAT;IFT140;VPS33A;PDE4D;MARS2;ATRX;CASK;KCNAB2;ARID1A;ARID1B;SPECC1L;SNRNP200;SHANK3;KMT2D;SRCAP;PRPF8;NALCN;RAI1;ANKH;NSD2;KIAA0753;HIVEP2;PCNT;CREBBP;BRPF1;IQSEC2;USP9X;BRAF;MERTK;GATAD2B;LETM1;SKI;ASXL1;SON;FRAS1;RAB3GAP2;TUBGCP6;UBA1;REEP6;ERCC6;CDK13
Yellow	DisGeNET.80	Cerebral atrophy	58/338	8.36643e-07	7.51514e-05	2.16079	30.2378	APP;ATP8A2;LAMC2;MTR;SLC2A3;PTPN23;BICD2;MECP2;PCLO;KIF1A;SERAC1;DNM1L;SPTAN1;SCN1A;GRID2;CDKL5;VPS13C;MARS2;ATRX;DYRK1A;VPS13A;CASK;KCNAB2;BACE1;SETBP1;ALS2;DNAJC6;HECW2;SPECC1L;ZNF436;KMT2D;ZNF592;FOXG1;STXBP1;SLC1A2;HTT;ATXN1;VPS53;NACC1;GABBR2;HACE1;SLC12A5;KIDINS220;BRAF;SORL1;TTC19;SKI;GNAO1;ASXL1;TBCK;POLR3A;SYNJ1;GNAQ;RAB3GAP2;TUBGCP6;ACO2;ERCC6;TECPR2
Yellow	DisGeNET.81	Aggressive reaction	27/110	8.67955e-07	7.70015e-05	3.36987	47.0337	SETD2;TRIO;KMT2A;MYT1L;AFF2;MED12;NDST1;HERC2;SIN3A;SLITRK1;GRIA3;SCN1A;MBD5;SLC6A17;VPS13A;OCRL;ANK3;ARID1B;TTC19;DNM1;SYN1;FOXP1;MAPK10;PACS1;TBC1D24;BCOR;ZMYND11
Yellow	KEGG_2019_Human.16	Retrograde endocannabinoid signaling	31/148	5.29383e-06	8.50322e-05	2.74588	33.3596	GRIA1;GABRB2;GABRB1;DAGLA;CACNA1B;ITPR1;CACNA1A;ADCY3;CACNA1D;CACNA1C;ADCY1;ADCY5;RIMS1;MAPK9;GRM5;MAPK8;CNR1;MAPK1;SLC17A7;GRIA3;PRKCG;KCNJ6;PRKCB;GABRA4;GABRG3;GNAO1;MAPK10;ADCY9;GNAQ;GNB1;PLCB1
Yellow	DisGeNET.82	Hypsarrhythmia	17/51	9.84028e-07	8.57517e-05	5.16411	71.428	NTRK2;ARFGEF2;GABRB1;CDKL5;ABCC8;KCNB1;STXBP1;TSC2;TSC1;GRIN2B;HCFC1;GNAO1;SETBP1;KIF1A;PLCB1;SCN2A;SPTAN1
Yellow	DisGeNET.83	Cerebellar Ataxia	85/565	9.90453e-07	8.57517e-05	1.85577	25.6562	GPI;SNAP25;GABRB1;TRIO;ATP8A2;KCNC1;KCNC3;PTEN;LAMC2;VLDLR;GPHN;SYNE1;MECP2;ZFYVE26;GRM5;SYNGAP1;OPA1;OPHN1;SACS;NEFL;TRAPPC11;KIF1A;DLAT;RGS6;DLGAP4;SCN1A;PRKCG;RUBCN;GRID2;KCND3;IFT140;ABCC8;MARS2;DYRK1A;VPS13A;FRMD4A;ANK1;DNM1;CACNB4;SCN8A;DCX;KMT2D;CEP104;ZNF592;PRKDC;KCNA1;STXBP1;ARHGEF28;KCNA2;SEL1L;KCNA3;ITPR1;PCDH15;CACNA1A;ATP1A3;PRICKLE1;FBXO41;TTBK2;GRIN2A;ATXN2;ATXN1;NSD2;KCNN3;SPTBN1…
Yellow	GO_Biological_Process_2018.34	cell morphogenesis involved in neuron differentiation (GO:0048667)	25/97	8.23799e-07	8.96487e-05	3.59503	50.364	RB1;APP;BRSK1;BRSK2;PLPPR4;CELSR2;OPHN1;MAP2;SLITRK1;MAP6;NRCAM;SLIT3;SLIT2;MEF2A;NTNG2;LINGO1;DCC;MINK1;ANK3;MAPK8IP2;RAB10;MAP1B;MAP1A;ADGRB1;CNTN4
Yellow	Reactome_2016.48	NRAGE signals death through JNK Homo sapiens R-HSA-193648	15/45	4.25421e-06	9.47873e-05	5.15939	63.8092	ARHGEF11;TRIO;ARHGEF12;ARHGEF17;ITSN1;KALRN;TIAM2;AKAP13;ABR;TIAM1;MAPK8;ARHGEF9;MCF2L;ARHGEF3;ARHGEF2
Yellow	Reactome_2016.49	Trafficking of GluR2-containing AMPA receptors Homo sapiens R-HSA-416993	9/17	4.2697e-06	9.47873e-05	11.5832	143.215	NSF;PRKCG;GRIA1;GRIP1;PRKCB;AP2A1;AP2B1;AP2A2;GRIA3
Yellow	Reactome_2016.50	Ras activation uopn Ca2+ infux through NMDA receptor Homo sapiens R-HSA-442982	9/17	4.2697e-06	9.47873e-05	11.5832	143.215	GRIN2A;ACTN2;DLG4;CAMK2A;AKAP9;NEFL;GRIN2C;GRIN2B;GRIN1
Yellow	DisGeNET.84	Postnatal growth retardation	23/86	1.11485e-06	9.5161e-05	3.77748	51.7771	ATP6V1A;KMT2D;CREBBP;KCNJ6;MBD5;INSR;ATRX;PTEN;CASK;COG1;SEMA3E;BRAF;ARID1B;NALCN;MECP2;SETBP1;DMXL2;DCX;EP300;DYM;RAB3GAP2;ERCC6;PCNT
Yellow	DisGeNET.85	Thick eyebrow	21/74	1.12562e-06	9.5161e-05	4.09735	56.1221	SETD5;CREBBP;SMAD4;MBD5;TRIO;KMT2A;ANKRD11;VPS13B;FRMD4A;ARID1A;AFF4;ARID1B;RPS6KA3;NIPBL;HECW2;SPECC1L;EP300;BCOR;ARID2;SHANK3;KCNH1
Yellow	DisGeNET.86	Motor delay	44/232	1.15486e-06	9.6341e-05	2.4341	33.2778	ATP6V1A;FBN2;SMARCAL1;TRIO;ZNF592;FOXG1;KCNC3;PCDH15;ITPR1;BICD2;MECP2;MED12;RPS6KA3;SYNGAP1;HERC2;KLC2;OPA1;NEFL;EPG5;SPEG;SLC12A6;EXTL3;SCN1A;SOX5;DYNC1H1;RUBCN;HGSNAT;MBD5;ABCC8;GFPT1;VPS13B;GRIN2B;MED13L;ZEB2;PREPL;PDE10A;SETBP1;ALS2;DMXL2;DCX;BCOR;MAPRE2;SHANK3;PLEC
Yellow	DisGeNET.87	Long eyelashes	18/57	1.17198e-06	9.6341e-05	4.76827	65.1194	SETD5;KMT2D;CREBBP;KMT2A;SRCAP;VPS33A;VPS13B;FRMD4A;ARID1A;AFF4;ARID1B;EGFR;NIPBL;PREPL;PACS1;EP300;ARID2;SHANK3
Yellow	DisGeNET.88	Congenital Epicanthus	47/255	1.17979e-06	9.6341e-05	2.35151	32.0986	RB1;ZNF592;KMT2A;FOXG1;CTNND2;GREB1L;JMJD1C;CHD4;UBE3B;CBL;AFF2;MECP2;MED12;UNC80;RPS6KA3;ADAMTS3;GNPTAB;SIN3A;NSD2;EP300;LRRC8A;KIF1A;SOX5;GTF2I;KCNH1;CREBBP;VPS33A;ATRX;CASK;BRAF;CPLANE1;KCNAB2;ARID1B;LETM1;SKI;PREPL;BMP2;KANSL1;HECW2;KAT6A;SPECC1L;COL5A2;NF1;RAB3GAP2;CDK13;MAPRE2;SHANK3
Yellow	Reactome_2016.51	Neurotransmitter Release Cycle Homo sapiens R-HSA-112310	16/51	5.03094e-06	0.000109497	4.71853	57.5657	SNAP25;SYT1;STXBP1;SLC1A1;SLC1A2;CASK;LIN7A;SYN3;SYN2;SYN1;GLS;RIMS1;DNAJC5;SLC17A7;APBA1;PPFIA3
Yellow	DisGeNET.89	Bowed and upward slanting eyebrows	20/69	1.39641e-06	0.000111496	4.21931	56.8831	HDAC4;SETD5;KMT2D;SZT2;CREBBP;MBD5;KMT2A;BCR;LETM1;RPS6KA3;NIPBL;SIN3A;PACS1;ASXL3;CDH11;SPECC1L;NSD2;ASXL2;EP300;MAPK1
Yellow	DisGeNET.90	Highly arched eyebrow	20/69	1.39641e-06	0.000111496	4.21931	56.8831	HDAC4;SETD5;KMT2D;SZT2;CREBBP;MBD5;KMT2A;BCR;LETM1;RPS6KA3;NIPBL;SIN3A;PACS1;ASXL3;CDH11;SPECC1L;NSD2;ASXL2;EP300;MAPK1
Yellow	DisGeNET.91	Small head	85/570	1.42867e-06	0.000112818	1.83612	24.7119	RB1;SETD5;SMARCAL1;TRIO;C2CD3;CTNND2;UBE3B;RBPJ;MECP2;MED12;RPS6KA3;GRIP1;DSTYK;NIPBL;SYNGAP1;SIN3A;KIF5C;EPG5;EP300;TRAPPC11;KIF1A;DLAT;DNM1L;SLC12A6;ARID2;GTF2I;CDKL5;ABCC8;ATRX;DYRK1A;VPS13B;CASK;KCNAB2;ARID1A;ANK1;ARID1B;HCFC1;CIT;BCR;KAT6B;KAT6A;SCN8A;CDH11;HDAC4;KMT2D;ZNF592;KMT2A;PRKDC;ANKRD11;FOXG1;STXBP1;UBR1;NALCN;DPP6;SLX4;NSD1;VPS53;NSD2;NACC1;MFN2;DYM;MAPK1;PCNT;DYNC1H1;GABBR2;ARNT2;…
Yellow	DisGeNET.92	Drug Dependence	36/175	1.49883e-06	0.000117072	2.6885	36.055	CHRM2;FHOD3;OPRD1;SLC1A2;PCDH15;XYLT1;AFF3;EGFR;SYNE1;GRM3;GRIN2A;GRM5;ABLIM1;SLK;CNR1;MAPK1;NRCAM;CSMD3;CSMD1;PKNOX2;KLF12;CERS6;HOMER1;PRKCE;INSR;SLC2A13;FRMD4A;BRAF;OPRM1;GRIN2B;TIAM2;PER2;PTPRB;NFASC;PACS1;XKR4
Yellow	DisGeNET.93	Acid reflux	31/140	1.54633e-06	0.000119483	2.94871	39.4527	SETD5;KMT2A;FOXG1;STXBP1;SEMA3E;NALCN;AFF4;GPHN;MECP2;RPS6KA3;RAI1;NIPBL;DPP9;NSD2;HIVEP2;KIF1A;KIAA0319L;GABBR2;ARNT2;CDKL5;IQSEC2;ABCC8;ATRX;BRAF;KCNAB2;LETM1;SKI;ASXL1;COL5A2;TECPR2;SHANK3
Yellow	GO_Biological_Process_2018.35	cytosolic transport (GO:0016482)	28/118	1.14242e-06	0.00012077	3.22347	44.1046	DCTN1;CLTC;AP2A1;VPS26B;PTPN23;EEA1;AP1G1;VPS53;VTI1A;ANKFY1;ERC1;RAB6B;SPAG9;MON2;RIC1;SORT1;VPS13C;GBF1;VPS13A;LMTK2;HOOK3;SYT7;GAK;FAM160A2;EHD3;HEATR5B;UBE2O;PIK3C3
Yellow	KEGG_2019_Human.17	Thyroid hormone signaling pathway	26/116	8.31275e-06	0.000123939	2.9898	34.9739	GSK3B;ATP2A2;ATP1A3;MED12L;MED12;CASP9;MED14;MED13;SIN3A;AKT3;EP300;MAPK1;PRKCG;NCOA1;MED1;NCOA2;CREBBP;PRKCB;PDPK1;TSC2;MTOR;MED13L;MED24;NCOR1;PLCB1;PFKP
Yellow	KEGG_2019_Human.18	cGMP-PKG signaling pathway	33/166	8.68055e-06	0.000123939	2.57206	29.9759	OPRD1;SRF;ITPR1;ATP2A2;ATP1A3;ADCY3;CACNA1D;CACNA1C;ADCY1;ADRA1A;SLC8A1;SLC8A2;ADCY5;AKT3;ADORA1;MAPK1;MEF2D;GTF2I;MEF2A;GUCY1A2;GUCY1A1;PPP1R12A;PRKCE;INSR;PDE2A;ATP2B4;ATP2B2;ATP2B1;ADRA2B;ADCY9;GNAQ;KCNMA1;PLCB1
Yellow	DisGeNET.94	Narcolepsy	47/258	1.65849e-06	0.000126786	2.31769	30.8476	FHOD3;RYR2;CTNND2;AKAP6;LAMC2;FRY;KALRN;JPH1;ALKBH8;HS6ST3;JAKMIP2;FAM171A1;TRIM9;GRIN2A;SNX29;DPP6;GRM5;NKAIN3;HINT3;DLGAP1;CSMD3;SERAC1;SRGAP2;LRRC4C;NFRKB;DLGAP2;ZNF365;CYB5B;ZYG11B;RBFOX1;KLF12;TMEM132B;ATP2B2;GABRG3;OXR1;TANC2;ANO3;BCR;TJP1;GNAO1;TIAM1;MRAS;LRRC7;MDGA2;CLOCK;ATF6;ASTN1
Yellow	DisGeNET.95	Amyotrophic Lateral Sclerosis	95/660	1.69986e-06	0.000127556	1.76404	23.4352	PCSK2;SNAP25;APP;ICE1;DDX46;LRRK2;PTPRN;PTEN;LAMC2;ADARB1;BICD2;CELSR3;CABIN1;MECP2;RIMS2;CASP9;GRM3;GRIP1;GRM2;GRM5;JPH3;CHL1;KHSRP;AKT3;NEFL;EPG5;KIF1B;MAP3K5;SRRM2;EPHA4;UNC13A;PARP1;DNMT3A;TIAM1;CLIP1;ALS2;MAP1B;SCN8A;SNURF;ZNF436;AMPH;NUP98;ATF6;INA;CAMK1G;GRIA1;HDAC4;MGRN1;DCTN1;SEMA3A;ARHGEF28;SLC1A1;KCNA3;SLC1A2;HTT;GLG1;EGFR;TTBK1;TTBK2;MTHFSD;TRPM2;KIAA0513;MAPK9;GRIN2A;ATXN2;SRR;DPP6;M…
Yellow	DisGeNET.96	Febrile Convulsions	19/64	1.70935e-06	0.000127556	4.36312	57.9396	APP;MBD5;SLC12A5;PRRT2;CHRNA4;STXBP1;DYRK1A;SEZ6;LAMC2;ANO3;AP3M2;STX1B;CLCN6;CNR1;KCNQ2;KCNQ3;SCN2A;SCN1A;HCN1
Yellow	DisGeNET.97	Large auricle	30/134	1.77897e-06	0.000127556	2.9899	39.5847	KMT2D;SETD2;TRIO;ZNF592;ANKRD11;PTEN;CBL;NALCN;MECP2;PCLO;OPHN1;HERC1;SIN3A;NSD1;KIF1A;SLC12A6;GTF2I;APC2;SLC6A17;INSR;DYRK1A;CASK;BRAF;MED13L;CIT;KANSL1;PACS1;HECW2;RAB3GAP2;SHANK3
Yellow	DisGeNET.98	Large pinnae	30/134	1.77897e-06	0.000127556	2.9899	39.5847	KMT2D;SETD2;TRIO;ZNF592;ANKRD11;PTEN;CBL;NALCN;MECP2;PCLO;OPHN1;HERC1;SIN3A;NSD1;KIF1A;SLC12A6;GTF2I;APC2;SLC6A17;INSR;DYRK1A;CASK;BRAF;MED13L;CIT;KANSL1;PACS1;HECW2;RAB3GAP2;SHANK3
Yellow	DisGeNET.99	Macrotia	30/134	1.77897e-06	0.000127556	2.9899	39.5847	KMT2D;SETD2;TRIO;ZNF592;ANKRD11;PTEN;CBL;NALCN;MECP2;PCLO;OPHN1;HERC1;SIN3A;NSD1;KIF1A;SLC12A6;GTF2I;APC2;SLC6A17;INSR;DYRK1A;CASK;BRAF;MED13L;CIT;KANSL1;PACS1;HECW2;RAB3GAP2;SHANK3
Yellow	DisGeNET.100	Dysarthria	50/282	1.78101e-06	0.000127556	2.24372	29.7032	SNAP25;ATP8A2;KCNC3;VLDLR;SYNE1;ZFYVE26;JPH3;SACS;PRKCG;RUBCN;GRID2;KCND3;VPS13A;CACNB4;ALS2;GAN;KAT6B;DNAJC6;DCX;ZNF592;DCTN1;KCNA1;KMT2B;ITPR1;CACNA1A;ATP1A3;PRICKLE1;TTBK2;ADCY5;RAI1;GRIN2A;ATXN2;ATXN1;KLC2;SPTBN2;UBQLN2;GFPT1;BRAF;SYT14;TTC19;MED13L;NR4A2;PDE10A;POLR3A;SYNJ1;CCDC88C;DMXL2;ATM;LZTR1;TECPR2
Yellow	DisGeNET.101	Abnormality of brain morphology	20/70	1.79282e-06	0.000127556	4.1347	54.7092	PTPRT;GTF3C1;VPS13B;HELZ;ANK3;SYNE1;GRIP1;ARHGAP21;ZEB2;OPA1;PTCHD1;EPB41L1;ASXL3;SACS;ULK2;BCOR;PLCB1;INA;SOX5;ASTN1
Yellow	DisGeNET.102	Language Disorders	17/53	1.81219e-06	0.000127671	4.87668	64.4745	APP;MBD5;CHRNA7;SORL1;CMIP;ROBO1;FOXP1;MED13L;BCR;NR4A2;SYNGAP1;GPD2;MAPK1;ATM;SHANK3;KIAA0319;SHANK2
Yellow	Reactome_2016.52	Cardiac conduction Homo sapiens R-HSA-5576891	29/135	6.26754e-06	0.000133788	2.83377	33.9489	RYR2;CAMK2A;ITPR1;ATP2A2;ATP1A3;CACNA1D;CACNA1C;SLC8A1;RYR3;SLC8A2;CACNG8;SCN3A;CACNG3;SCN1A;KCND2;KCND3;CACNA2D3;ATP2B4;ATP2B2;ATP2B1;HIPK1;HIPK2;CACNB1;CACNB2;CACNB4;SCN8A;AKAP9;SCN2A;SCN2B
Yellow	Reactome_2016.53	EPH-Ephrin signaling Homo sapiens R-HSA-2682334	23/95	7.03589e-06	0.000147063	3.30366	39.1962	EPHA5;ACTR2;EPHA4;EPHA7;EPHA6;ARHGEF28;CLTC;ITSN1;ADAM10;AP2A1;WASL;AP2B1;AP2A2;KALRN;GRIN2B;DNM1;PTK2;GRIN1;TIAM1;MYH9;MYH10;GIT1;EPHB3
Yellow	Reactome_2016.54	SALM protein interactions at the synapse Homo sapiens R-HSA-8849932	10/22	7.15441e-06	0.000147063	8.58314	101.691	GRIA1;GRIN2A;PTPRS;DLG3;DLG4;GRIN2C;GRIN2B;PTPRF;GRIA3;GRIN1
Yellow	KEGG_2019_Human.19	Synaptic vesicle cycle	20/78	1.09795e-05	0.000148512	3.56283	40.6856	NSF;ATP6V1A;SNAP25;UNC13A;SYT1;STXBP1;CLTC;SLC1A1;SLC1A2;CACNA1B;CACNA1A;AP2A1;AP2B1;AP2A2;DNM1;DNM3;RIMS1;STX1B;SLC17A7;ATP6V0A1
Yellow	DisGeNET.103	Epileptic drop attack	27/115	2.19579e-06	0.000153193	3.17752	41.3998	CHRM1;CHRNA4;CHRNA7;FOXG1;SLC1A1;KCNA2;PRICKLE1;SLC8A1;MECP2;CNR1;SLC17A7;MPDZ;SCN1A;RBFOX1;CDKL5;SLC12A5;TSC2;TSC1;OPRM1;SYN2;DNM1;MIB1;LETM1;MAPK10;STX1B;KCNQ2;HCN1
Yellow	DisGeNET.104	High density lipoprotein measurement	55/324	2.24495e-06	0.000155117	2.1304	27.7098	APP;GSK3B;SETD2;RIPOR1;BMPR2;NCAN;PTEN;JMJD1C;SNX13;ATP2A2;ARRB1;FMN2;UBE3B;CELSR2;ADRA1A;CMIP;AFF2;CABIN1;SMPD3;CASP9;SGCD;ARL15;ABCC5;STARD9;SORCS1;SYN3;SYN1;NCOR1;COL4A1;MADD;NOS1AP;PGR;CLOCK;GAS7;OSBP2;SIDT2;MACF1;LRP1;CACNA1C;LRP8;HECTD4;DYM;SRGAP2;GABBR2;SMAD4;PDE2A;DNAJC13;ATP2B1;TTC39B;POLR3A;DLG3;MYO5B;ATM;SUGP2;R3HDM2
Yellow	KEGG_2019_Human.20	Aldosterone synthesis and secretion	23/98	1.22129e-05	0.000156935	3.17099	35.8734	PRKCG;DAGLA;CAMK1D;PRKCB;PRKCE;PDE2A;CAMK2A;ITPR1;ATP2B4;ATP1A3;ADCY3;CACNA1D;ATP2B2;CACNA1C;ADCY1;ATP2B1;ADCY5;NR4A2;ADCY9;GNAQ;CAMK4;PLCB1;CAMK1G
Yellow	DisGeNET.105	Cognition	17/54	2.42695e-06	0.000166096	4.74462	61.3426	NCOA1;ATF7IP;DCC;DENND4A;TET2;JMJD1C;AFF3;CELSR3;PTPRF;FOXP1;ATXN2L;SLC22A23;EXOC4;TTLL11;FAM193A;BSN;BRWD1
Yellow	DisGeNET.106	Complex partial seizures	27/116	2.62235e-06	0.000177776	3.14165	40.3747	CHRM1;CHRNA4;CHRNA7;FOXG1;SLC1A1;KCNA2;CACNA1D;SLC8A1;MECP2;CNR1;SLC17A7;MPDZ;SCN1A;RBFOX1;CDKL5;SLC12A5;TSC2;TSC1;OPRM1;SYN2;MTOR;MIB1;LETM1;STX1B;KCNQ2;GNB1;HCN1
Yellow	DisGeNET.107	Low anterior hairline	16/49	2.78648e-06	0.000185407	5.00506	64.0183	SETD5;CREBBP;KMT2A;ANKRD11;KREMEN1;VPS13B;FRMD4A;ARID1A;ASXL1;RPS6KA3;NIPBL;PACS1;EP300;RAB3GAP2;SLC12A6;TECPR2
Yellow	DisGeNET.108	Atrial Septal Defects	34/165	2.78652e-06	0.000185407	2.6923	34.4365	FBN2;KMT2D;SNAP25;BMPR2;PTEN;JMJD1C;SEMA3E;UBR1;MED12;GRM5;NSD1;NSD2;EP300;EVC2;CREBBP;KLF13;ABCC8;USP9X;BRAF;ARID1B;LETM1;ASXL1;ARHGAP31;ZEB2;SETBP1;KANSL1;COL4A1;KAT6B;KAT6A;SPECC1L;CDH11;ASXL2;BCOR;CDK13
Yellow	GO_Biological_Process_2018.36	positive regulation of signal transduction (GO:0009967)	40/206	1.8897e-06	0.00019422	2.50336	32.992	NLGN3;MACF1;NLGN2;MAML1;CHRNA7;PTEN;RBPJ;PRKCZ;ROBO1;RIMS2;RIMS1;DSTYK;CUX2;ADAMTS3;ZMIZ1;RSPO2;TSPAN5;EP300;PTK2B;TRIM44;CREBBP;MBD5;HOMER1;PRKCB;EPN2;SKI;ERN1;ASXL1;STX1B;BMP2;DLG4;ASXL2;CNTN1;AAK1;LANCL2;ITGA5;SHANK3;JCAD;SHANK2;SHANK1
Yellow	GO_Biological_Process_2018.37	dendritic spine morphogenesis (GO:0060997)	9/16	2.18198e-06	0.000211209	13.2387	172.57	DLG4;CTNND2;PTEN;WASL;SHANK3;SHANK2;ZNF365;SHANK1;EPHB3
Yellow	GO_Biological_Process_2018.38	dendritic spine organization (GO:0097061)	11/24	2.22626e-06	0.000211209	8.71965	113.488	DLG4;INSR;CHRNA7;CTNND2;PTEN;WASL;SHANK3;SHANK2;ZNF365;SHANK1;EPHB3
Yellow	GO_Biological_Process_2018.39	regulation of AMPA receptor activity (GO:2000311)	11/24	2.22626e-06	0.000211209	8.71965	113.488	NLGN3;CACNG8;NLGN2;MINK1;MAPK8IP2;CNIH3;SHANK3;CACNG3;SHISA7;SHANK2;SHANK1
Yellow	DisGeNET.109	Epilepsy, Generalized	17/55	3.22343e-06	0.00021251	4.6195	58.4139	RBFOX1;CHRNA4;CHRNA7;KCNA3;CACNA1A;NEDD4L;SLC2A3;OPRM1;CLCN2;DNM1;SYNGAP1;CACNB4;KCNMA1;KCNQ3;SCN2A;SCN1A;HCN1
Yellow	DisGeNET.110	Tonic Seizures	25/104	3.27773e-06	0.000213472	3.27522	41.3606	CHRM1;CHRNA4;CHRNA7;FOXG1;SLC1A1;KCNA2;SLC8A1;MECP2;CNR1;SLC17A7;MPDZ;SCN1A;RBFOX1;CDKL5;SLC12A5;TSC2;TSC1;OPRM1;SYN2;MIB1;LETM1;KCNQ2;SCN2A;PLCB1;HCN1
Yellow	DisGeNET.111	Byzanthine arch palate	49/280	3.29744e-06	0.000213472	2.20721	27.8603	SETD5;SETD2;TRIO;CTNND2;PTEN;UBE3B;MECP2;MED12;RPS6KA3;NIPBL;SMCHD1;PCLO;HERC1;SIN3A;EPG5;EP300;SPEG;SLC12A6;KCNH1;APC2;ATRX;CASK;ANK1;ARID1B;SETBP1;KAT6B;SPECC1L;ZNF436;SHANK3;ATP6V1A;FBN2;KMT2D;ZNF592;KMT2A;ANKRD11;NALCN;NSD1;LRRC8A;CREBBP;KCNJ6;SMAD3;INSR;GFPT1;BRAF;CPLANE1;SON;KANSL1;RAB3GAP2;LZTR1
Yellow	GO_Biological_Process_2018.40	axonogenesis (GO:0007409)	42/223	2.41492e-06	0.00022338	2.41147	31.1896	CYFIP2;ROBO2;NLGN3;APP;BRSK1;BRSK2;SHC3;PLPPR4;SEMA3A;PTEN;VLDLR;ARHGAP35;ROBO1;OPHN1;KIF5C;SLITRK1;TNR;MAPK1;NRCAM;SLIT3;SLIT2;SPTAN1;SPTBN1;EPHB3;SPTBN2;EPHA5;NTNG2;LINGO1;USP9X;DCC;FRS2;ANK3;L1CAM;SPTB;PTK2;RAB10;MAP1B;MAP1A;ADGRB1;ULK2;CNTN4;SHANK3
Yellow	DisGeNET.112	Attention Deficit Disorder	20/73	3.67152e-06	0.000235568	3.90002	48.8083	APP;SNAP25;NTRK2;CREBBP;NUFIP2;CHRNA4;PTEN;LAMC2;CACNA1C;GRIN2B;ADD2;MECP2;PER1;GRM5;BRINP1;PTCHD1;CNR1;NF1;GIT1;ADGRL3
Yellow	DisGeNET.113	Idiopathic generalized epilepsy	16/50	3.76131e-06	0.000239193	4.85758	60.6748	RBFOX1;GABBR1;SLC12A5;DST;CHRNA7;OPRM1;SLC4A3;CLCN2;GPHN;CACNB4;KCNQ2;KCNQ3;SLC12A6;SCN2A;SCN1A;HCN1
Yellow	GO_Biological_Process_2018.41	synaptic vesicle endocytosis (GO:0048488)	12/29	2.89585e-06	0.000256811	7.27666	92.7937	NLGN3;DNM3;GAK;NLGN2;OPHN1;SYT1;SYNJ1;DNAJC6;ITSN1;PIP5K1C;DNM1;PACSIN1
Yellow	GO_Biological_Process_2018.42	central nervous system development (GO:0007417)	41/217	2.91515e-06	0.000256811	2.42021	30.847	ROBO2;NCKAP1;NCAN;CHD8;ADAM22;PTEN;HAPLN4;PKD1;NPAS2;HAPLN1;PHF8;AFF2;BAG6;RPS6KA3;GRIN2A;NIPBL;SRR;ATXN1;ADAM23;SPOCK1;NRCAM;SH3GL2;BPTF;ARNT2;EPHA7;SZT2;SLC6A17;NCOA6;ZBTB16;POU6F2;TBR1;GRIN2C;HPCAL4;GRIN2B;DCLK1;NR4A2;COL4A1;IL1RAPL2;NF1;DCX;CNTN4
Yellow	DisGeNET.114	idiopathic epilepsy	10/21	4.2406e-06	0.000264982	9.36394	115.84	RBFOX1;CHRNA4;KCNQ2;KCNA3;KCNQ3;SCN2A;CLCN2;SYN1;SCN1A;SCN2B
Yellow	DisGeNET.115	Olivopontocerebellar Atrophies	10/21	4.2406e-06	0.000264982	9.36394	115.84	GRM3;SNAP25;GRM2;ATXN2;ATXN1;SLC1A1;SLC1A2;ERCC6;TTC19;GRIA3
Yellow	GO_Biological_Process_2018.43	postsynaptic density assembly (GO:0097107)	6/7	3.16826e-06	0.000269502	61.6964	781.22	NLGN2;PTEN;NRXN2;SHANK3;SHANK2;SHANK1
Yellow	GO_Biological_Process_2018.44	clathrin-dependent endocytosis (GO:0072583)	14/39	3.26542e-06	0.000269502	5.77683	72.9736	NLGN3;NLGN2;SYT1;ITSN1;CLTC;AP2A1;AP2B1;AP2A2;GAK;OPHN1;SYNJ1;DNAJC6;PIP5K1C;PACSIN1
Yellow	GO_Biological_Process_2018.45	regulation of cellular response to stress (GO:0080135)	25/104	3.27773e-06	0.000269502	3.27522	41.3606	GSK3B;POM121;SMG1;CAMK2A;NPAS2;ARNTL;CASP9;RPTOR;TPR;EP300;MAPK1;NUP214;RANBP2;CREBBP;NUP210;NUP155;NUP133;NUP153;VASH1;EIF2AK4;OPRM1;MTOR;ATM;NUP98;EIF4G1
Yellow	Reactome_2016.55	Transport to the Golgi and subsequent modification Homo sapiens R-HSA-948021	32/162	1.35295e-05	0.000273049	2.55064	28.5943	GRIA1;NAPB;COPA;DCTN1;MIA3;MAN2A2;MAN2A1;PPP6R1;MAN1A2;MGAT5;MAN1A1;SPTAN1;SPTBN1;SEC31A;SPTBN2;NSF;DYNC1H1;COG5;SEC16A;TRAPPC10;ST8SIA3;GBF1;COG1;ANK2;ANK3;ANK1;SPTB;F8;GOLGB1;MGAT4A;COPG1;CNIH3
Yellow	DisGeNET.116	Myoclonus	32/154	4.49039e-06	0.000278172	2.7191	33.4818	APP;KCNC1;CTNND2;STXBP1;KCNA2;CACNA1B;PRICKLE1;GPHN;ADCY5;MECP2;ATXN2;SPTAN1;SCN1A;PRKCG;NTRK2;CDKL5;PRRT2;KCND3;GRIN2B;ADRA2B;SORL1;DNM1;ANO3;MAPK10;SCN8A;KCNQ2;KCNQ3;TBC1D24;DCX;ATM;SCN2A;PLCB1
Yellow	DisGeNET.117	Alzheimer's Disease	232/1982	4.56569e-06	0.000280419	1.41249	17.3694	RB1;APP;ZNF292;ITSN1;ADARB1;HTR6;ANKS1B;NUP214;SRRM2;MEF2A;EPHA4;PRKCB;COG5;DAPK1;PRKCE;ANK3;GABRG3;ANK1;KIAA1217;HECW2;MAP1B;MAP1A;AKAP9;NUP98;ASTN2;CLOCK;STXBP1;KALRN;TTBK1;TRPM2;GRIN2A;MAP2;KCNN2;SPTBN1;SRPK2;CREBBP;PRRT2;HOMER1;HOMER2;ST8SIA1;PLK2;INSR;FN1;PRRC2C;LNPEP;EIF2AK4;GRIN2B;SNAP91;DCHS2;OGDH;ATM;BAP1;GPI;RYR2;HIP1;SNX12;LRRC4;CHM;FMN2;VLDLR;AP2A2;RYR3;PTPRG;MED12;CHL1;NEFL;APPL1;APC…
Yellow	DisGeNET.118	No development of motor milestones	42/229	4.86861e-06	0.00029649	2.33332	28.5428	ATP6V1A;FBN2;SMARCAL1;TRIO;ZNF592;FOXG1;KCNC3;PCDH15;ITPR1;BICD2;MED12;RPS6KA3;SYNGAP1;HERC2;KLC2;OPA1;NEFL;EPG5;SPEG;SLC12A6;EXTL3;SCN1A;SOX5;DYNC1H1;RUBCN;HGSNAT;MBD5;ABCC8;GFPT1;VPS13B;MED13L;ZEB2;PREPL;PDE10A;SETBP1;ALS2;DMXL2;DCX;BCOR;MAPRE2;SHANK3;PLEC
Yellow	GO_Biological_Process_2018.46	calcium ion transport (GO:0006816)	27/118	3.7116e-06	0.000298542	3.07226	38.4157	SLC24A2;RYR2;SLC24A4;CHRNA4;CHRNA7;CAMK2A;CACNA1B;ITPR1;CACNA1A;ATP2A2;CACNA1D;CACNA1C;NALCN;CACNA1E;PKD1;SLC8A1;RYR3;SLC8A2;TRPM2;CACNG8;CACNG3;TRPC5;ATP2B4;ANK2;ATP2B2;CACNB2;ORAI2
Yellow	Reactome_2016.56	PPARA activates gene expression Homo sapiens R-HSA-1989781	25/113	1.56369e-05	0.000309946	2.93879	32.5203	CHD9;MED15;NPAS2;ARNTL;HELZ2;MED12;MED14;MED13;EP300;PPARGC1B;NCOA1;MED1;NCOA2;CREBBP;ACSL1;NCOA6;SREBF2;MED13L;TIAM2;MED24;NCOR1;MTF1;CARM1;RGL1;CLOCK
Yellow	Reactome_2016.57	Transcriptional activity of SMAD2/SMAD3:SMAD4 heterotrimer Homo sapiens R-HSA-2173793	14/44	1.62718e-05	0.000311409	4.8127	53.0652	SMAD2;SMAD4;CCNT2;SMAD3;SMURF2;PARP1;USP9X;NEDD4L;SKI;NCOR2;NCOR1;RNF111;TRIM33;MEN1
Yellow	Reactome_2016.58	Phase 0 - rapid depolarisation Homo sapiens R-HSA-5576892	14/44	1.62718e-05	0.000311409	4.8127	53.0652	CAMK2A;CACNA2D3;CACNA1D;CACNA1C;CACNB1;CACNB2;CACNG8;CACNB4;SCN8A;SCN2A;SCN3A;CACNG3;SCN1A;SCN2B
Yellow	DisGeNET.119	Electroencephalogram abnormal	30/141	5.35932e-06	0.000323631	2.80027	33.9859	CTNND2;FOXG1;STXBP1;CACNA1A;HTT;SLC2A3;BICD2;MECP2;RAI1;SYNGAP1;EP300;EPG5;SLC12A6;SCN1A;GABBR2;SZT2;CREBBP;CDKL5;IQSEC2;TSC2;OCRL;TSC1;BRAF;KCNAB2;GRIN2B;ADRA2B;SKI;HECW2;GNB1;SCN2A
Yellow	DisGeNET.120	Congenital Heart Defects	48/277	5.46226e-06	0.000325665	2.18003	26.4169	RB1;RYR2;LRRC59;PRKAA2;MGRN1;CELF2;GREB1L;PTEN;ATP2A2;MTR;SLC2A3;AHR;CACNA1C;TNFRSF11A;PKD1;AFF4;EGFR;SYNE1;MED12;GRIP1;RAI1;NIPBL;MED13;OPA1;SIN3A;SAP130;ARID2;SMAD2;CREBBP;KCNJ6;IQSEC2;NCOA6;ABCC8;NTRK3;DNMT3A;DYRK1A;ATP2B2;ARID1A;ARID1B;MED13L;FOXP1;ASXL1;ZEB2;FRAS1;GNAQ;NF1;ZFPM2;CDK13
Yellow	DisGeNET.121	Low set ears	50/293	5.48365e-06	0.000325665	2.14085	25.9337	RB1;JMJD1C;CHD4;MECP2;MED12;UNC80;RPS6KA3;GRIP1;NIPBL;PCLO;ADAMTS3;HERC1;EPG5;EP300;SOX5;MARS2;ATRX;LIFR;FRMD4A;ARID1A;ARID1B;SETBP1;PACS1;KAT6B;KAT6A;SPECC1L;MAPRE2;ATP6V1A;ZNF592;KMT2A;GREB1L;CBL;NALCN;LRRC8A;PCNT;CREBBP;MBD5;SMAD4;USP9X;INSR;BRAF;CPLANE1;MED13L;SKI;ASXL1;SON;FRAS1;ASXL2;NF1;BCOR
Yellow	DisGeNET.122	Broad nasal tip	17/57	5.55459e-06	0.000327175	4.38805	53.0992	ATP6V1A;AGL;CASK;CPLANE1;ARID1B;PTPRF;PHF8;FOXP1;RPS6KA3;KAT6A;CDH11;NACC1;ASXL2;RAB3GAP2;ZSWIM6;BCOR;EXTL3
Yellow	GO_Biological_Process_2018.47	peptidyl-threonine phosphorylation (GO:0018107)	19/68	4.65123e-06	0.000366161	4.00607	49.188	GSK3B;CAMK1D;PDPK1;TNKS;LRRK2;CAMK2A;DYRK1A;LMTK2;DCLK2;NLK;TTBK1;CAMKK1;HIPK3;DCLK1;CAMKK2;HIPK2;MAPK8;MAPK1;CAMK1G
Yellow	DisGeNET.123	Dystonia Disorders	29/135	6.26754e-06	0.000366167	2.83377	33.9489	APP;TRIO;LRRK2;KMT2B;CACNA1B;CACNA1A;ATP1A3;LAMC2;ADCY5;RIMS2;ATXN2;GRM5;ATXN1;MCF2L;SERAC1;PRKCG;PRRT2;DST;TET2;ATP2B4;ANO3;SETX;ASXL1;GNAL;ALS2;LRRC7;SCN8A;GNB1;ATM
Yellow	DisGeNET.124	Sleep disturbances	24/101	6.33853e-06	0.000367328	3.22439	38.5923	SETD5;HGSNAT;MBD5;CDKL5;KMT2A;IQSEC2;DCTN1;LRRK2;LAMC2;AHR;CACNA1C;GPHN;ARNTL;GNAO1;NR4A2;MECP2;PER2;NDST1;RAI1;ATXN2;NIPBL;SIN3A;SLITRK1;CLOCK
Yellow	DisGeNET.125	Absent speech	21/82	6.80906e-06	0.000390101	3.55842	42.3355	C2CD3;BCL11B;FOXG1;STXBP1;CASK;KCNAB2;ARID1A;AP3B2;ARID1B;GRIN2B;BICD2;DNM1;MECP2;MED12;GNAO1;SKI;ZEB2;SYNGAP1;SETBP1;KIF5C;NACC1
Yellow	DisGeNET.126	Mental Depression	83/575	6.84008e-06	0.000390101	1.76462	20.9862	CHRM2;SNAP25;APP;GSK3B;GPR26;CRTC1;PREP;GRIK3;ATP2A2;ARRB1;LAMC2;MTR;VLDLR;SYNE1;MECP2;MED12;GRM3;HTR6;GRM5;PCLO;CHL1;NEFL;PDE4A;SRRM2;TLE1;DST;PRKCB;PDE4D;ADAM10;DICER1;OPRM1;ANK1;SYN1;CIT;RNF123;NOS1AP;KIT;CRY2;CLOCK;NPSR1;GRIA1;HDAC4;PDE1B;CHRNA4;SLC1A1;CAMK2A;KCNA3;SLC1A2;HTT;ATP1A3;ADCY1;CACNA1C;EGFR;NPAS2;ADCY5;ARNTL;RAI1;GRIN2A;MAPK8;CNR1;MFN2;MAPK1;PCNT;GRIA3;ATF7IP;NTRK2;KCNJ6;EGR3;HOMER…
Yellow	DisGeNET.127	Large cell carcinoma of lung	17/58	7.21133e-06	0.000404848	4.28079	50.6839	EPHA5;BRSK1;PRRT2;TRRAP;NTRK3;CASK;LMTK2;OPRM1;CDC42BPB;EGFR;TTBK1;MTOR;PTPRG;LATS1;CAMK4;WNK3;TRIB1
Yellow	DisGeNET.128	SCHIZOPHRENIA 1 (disorder)	17/58	7.21133e-06	0.000404848	4.28079	50.6839	GSK3B;SNAP25;CHRNA7;MAGI2;MTOR;GRIN1;BACE1;NR4A2;SRR;SYNGAP1;CNR1;MAP6;ATM;SRGAP3;PLCB1;SHANK3;CSMD1
Yellow	DisGeNET.129	Hypoplasia of corpus callosum	36/187	7.4099e-06	0.000412772	2.4732	29.2152	GABRB1;ZNF592;C2CD3;FOXG1;STXBP1;ANKRD11;SLC1A2;LIN7A;ZFYVE26;HERC2;PCLO;OPHN1;KIF5C;SIN3A;VPS53;NSD1;AKT3;ZSWIM6;SPTAN1;ARNT2;ARFGEF2;L1CAM;ARID1B;GNAO1;ASXL1;TBCK;ARHGAP31;ZEB2;SON;POLR3A;SYNJ1;SETBP1;RAB3GAP2;ACO2;TECPR2;MAPRE2
Yellow	DisGeNET.130	Bulbous nasal tip	21/83	8.35929e-06	0.000447951	3.50084	40.9322	SMARCAL1;MBD5;SRCAP;USP9X;FOXG1;KMT2B;DYRK1A;JMJD1C;BRAF;ARID1B;CIT;MED13L;MED12;UNC80;TBCK;KANSL1;KAT6B;PACS1;HECW2;SHANK3;SOX5
Yellow	DisGeNET.131	Bulbous nose	21/83	8.35929e-06	0.000447951	3.50084	40.9322	SMARCAL1;MBD5;SRCAP;USP9X;FOXG1;KMT2B;DYRK1A;JMJD1C;BRAF;ARID1B;CIT;MED13L;MED12;UNC80;TBCK;KANSL1;KAT6B;PACS1;HECW2;SHANK3;SOX5
Yellow	DisGeNET.132	Gait Ataxia	21/83	8.35929e-06	0.000447951	3.50084	40.9322	PRKCG;GRID2;HIP1;KCND3;KCNC3;MARS2;ITPR1;ATP1A3;HTT;VLDLR;CLCN2;FBXO41;SYNE1;MECP2;SETX;OPHN1;HERC1;SYNJ1;DNAJC6;TECPR2;SPTBN2
Yellow	DisGeNET.133	Potato nose	21/83	8.35929e-06	0.000447951	3.50084	40.9322	SMARCAL1;MBD5;SRCAP;USP9X;FOXG1;KMT2B;DYRK1A;JMJD1C;BRAF;ARID1B;CIT;MED13L;MED12;UNC80;TBCK;KANSL1;KAT6B;PACS1;HECW2;SHANK3;SOX5
Yellow	DisGeNET.134	Absence Seizures	27/123	8.47778e-06	0.000447951	2.91144	34	CHRM1;CHRNA4;CHRNA7;FOXG1;SLC1A1;KCNA2;SLC8A1;MECP2;CNR1;SLC17A7;MPDZ;SCN1A;SZT2;RBFOX1;CDKL5;PRRT2;SLC12A5;TSC2;TSC1;OPRM1;SYN2;MIB1;LETM1;STX1B;KCNQ2;KCNMA1;HCN1
Yellow	DisGeNET.135	Involuntary jerking movements	27/123	8.47778e-06	0.000447951	2.91144	34	APP;KCNC1;CTNND2;STXBP1;KCNA2;CACNA1B;GPHN;MECP2;ATXN2;SPTAN1;SCN1A;NTRK2;CDKL5;PRRT2;KCND3;GRIN2B;ADRA2B;SORL1;DNM1;MAPK10;SCN8A;KCNQ2;KCNQ3;TBC1D24;ATM;SCN2A;PLCB1
Yellow	DisGeNET.136	Spasmodic movement	27/123	8.47778e-06	0.000447951	2.91144	34	APP;KCNC1;CTNND2;STXBP1;KCNA2;CACNA1B;GPHN;MECP2;ATXN2;SPTAN1;SCN1A;NTRK2;CDKL5;PRRT2;KCND3;GRIN2B;ADRA2B;SORL1;DNM1;MAPK10;SCN8A;KCNQ2;KCNQ3;TBC1D24;ATM;SCN2A;PLCB1
Yellow	DisGeNET.137	Other specified types of schizophrenia, unspecified	16/53	8.77171e-06	0.000460099	4.46299	51.9669	GSK3B;SNAP25;CHRNA7;MAGI2;MTOR;GRIN1;BACE1;NR4A2;SRR;SYNGAP1;CNR1;MAP6;SRGAP3;PLCB1;SHANK3;CSMD1
Yellow	DisGeNET.138	Dystonia	44/251	9.78753e-06	0.000509661	2.20835	25.472	APP;TRIO;CHRNA4;FOXG1;LRRK2;KMT2B;CACNA1B;CACNA1A;ATP1A3;LAMC2;ADCY5;MECP2;RIMS2;ATXN2;GRM5;JPH3;ATXN1;MCF2L;TRAPPC11;SERAC1;UBQLN2;PRKCG;PRRT2;DST;MARS2;TET2;VPS13A;ATP2B4;MYO5A;CASK;TTC19;ANO3;SETX;NR4A2;GNAL;POLR3A;SYNJ1;ALS2;LRRC7;DNAJC6;SCN8A;KCNQ2;DMXL2;ATM
Yellow	GO_Biological_Process_2018.48	regulation of cell morphogenesis involved in differentiation (GO:0010769)	13/36	6.7893e-06	0.000523342	5.82798	69.354	EPHA4;NEDD4L;SSH2;ARHGAP35;PTK2;SIPA1L1;HECW2;NEDD4;CHN1;HECW1;TNIK;LRRC4C;EPHB3
Yellow	DisGeNET.139	Mental Retardation, X-Linked 1	15/48	1.04412e-05	0.000539787	4.68958	53.7883	IQSEC2;FRMPD4;USP9X;HUWE1;AFF2;HCFC1;MECP2;MED12;CNKSR2;RPS6KA3;CLCN4;OPHN1;PTCHD1;DLG3;GRIA3
Yellow	GO_Biological_Process_2018.49	regulation of microtubule depolymerization (GO:0031114)	10/22	7.15441e-06	0.000540231	8.58314	101.691	NAV3;APC;MAP1B;MAP1A;ARHGEF2;CAMSAP1;CLASP1;TTBK2;CAMSAP2;CLASP2
Yellow	DisGeNET.140	Stereotyped Behavior	20/78	1.09795e-05	0.000563562	3.56283	40.6856	NTRK2;CREBBP;MBD5;CDKL5;IQSEC2;FOXG1;OCRL;KCNAB2;EGFR;FOXP1;MECP2;BCR;LETM1;SKI;RAI1;GNAL;NSD2;NACC1;EP300;ATM
Yellow	KEGG_2019_Human.21	Phosphatidylinositol signaling system	22/99	4.61178e-05	0.000564394	2.95233	29.477	PRKCG;MTMR3;PRKCB;ITPR1;PTEN;OCRL;MTMR4;DGKZ;INPP4A;INPP5B;PPIP5K1;SYNJ1;DGKQ;INPP5J;PI4KA;PIP4K2B;PIK3C3;PIP4K2C;PIP5K1C;PLCB1;DGKI;DGKH
Yellow	KEGG_2019_Human.22	Endocrine and other factor-regulated calcium reabsorption	14/48	4.86387e-05	0.000568189	4.24556	42.1631	PRKCG;PRKCB;CLTC;ATP1A3;AP2A1;AP2B1;ATP2B1;AP2A2;SLC8A1;DNM1;DNM3;ADCY9;GNAQ;PLCB1
Yellow	KEGG_2019_Human.23	Insulin secretion	20/86	5.08666e-05	0.000568379	3.12959	30.9401	PRKCG;SNAP25;RYR2;ABCC8;PRKCB;CAMK2A;ATP1A3;ADCY3;CACNA1D;ADCY1;CACNA1C;ADCY5;RIMS2;PCLO;ADCY9;GNAQ;KCNMA1;KCNN2;KCNN3;PLCB1
Yellow	DisGeNET.141	Huntington Disease	88/627	1.11625e-05	0.000568891	1.7083	19.4796	SNAP25;APP;GSK3B;SETD2;CHRM1;HIP1;CRTC1;ATP2A2;SLC2A3;ADRA1A;MECP2;RIMS2;RPH3A;CASP9;GRM2;PCM1;GRM5;JPH3;KHSRP;NEFL;PDE4A;DNM1L;BTRC;GIT1;MAP3K5;APC2;SRRM2;CAP1;NSF;MYLIP;TRPC5;PPP1R12A;FBXW7;ATRX;VPS13A;TSC1;ADRA2B;SYN2;SYN1;FOXP1;ERN1;DCX;FAM193A;ATF6;HDAC4;PDE1B;SLC1A1;ITPR1;SLC1A2;HTT;CACNA1A;LIN7A;ADD1;GRIN2A;ATXN2;DPP6;MAPK8;ATXN1;MAP2;CNR1;E2F1;MFN2;MAPK1;TPPP;UBQLN4;BRD4;UBQLN2;SPTBN2;PAC…
Yellow	DisGeNET.142	Autistic behavior	16/54	1.14432e-05	0.000578632	4.3453	49.4413	SETD2;CDKL5;NUFIP2;PTEN;HTT;TBR1;ARID1B;DNM1;SYN1;MECP2;MAPK10;SYNGAP1;PTCHD1;HIVEP2;SHANK3;SCN1A
Yellow	DisGeNET.143	Convulsions	26/118	1.15147e-05	0.000578632	2.92448	33.2569	CHRM1;CHRNA4;CHRNA7;FOXG1;SLC1A1;KCNA2;KCNA3;LAMC2;SLC8A1;MECP2;CNR1;SLC17A7;MPDZ;RBFOX1;CDKL5;PRRT2;SLC12A5;TSC2;TSC1;OPRM1;SYN2;MIB1;LETM1;SYNJ1;KCNQ2;HCN1
Yellow	KEGG_2019_Human.24	Axon guidance	33/181	5.47573e-05	0.000586359	2.30946	22.6618	ROBO2;GSK3B;SEMA7A;BMPR2;SEMA3A;CAMK2A;LRRC4;SEMA3E;PRKCZ;ROBO1;ABLIM1;PLXNA2;MAPK1;SLIT3;SRGAP3;SLIT2;SRGAP2;LRRC4C;NEO1;PLXNA4;EPHB3;EPHA5;EPHA4;NTNG2;EPHA7;TRPC5;EPHA6;ARHGEF12;DCC;SEMA4G;L1CAM;SSH2;PTK2
Yellow	DisGeNET.144	Severe psychomotor retardation	18/66	1.19157e-05	0.000594626	3.8723	43.9028	NTRK2;KCNJ6;CTNND2;STXBP1;DYRK1A;CASK;TBR1;ARID1A;MECP2;RPS6KA3;NIN;GNPTAB;ASXL3;DYM;RAB3GAP2;ACO2;ERCC6;SOX5
Yellow	GO_Biological_Process_2018.50	protein localization to plasma membrane (GO:0072659)	28/130	8.52989e-06	0.000631212	2.84235	33.1758	MACF1;STXBP1;GOLGA4;DPP6;TSPAN5;SPTBN1;PACSIN1;CLASP2;NSF;ACTN2;KCNB1;KCNB2;TTC7B;MYO5A;ANK2;ANK3;ANK1;EFR3B;GAK;RAB10;CACNB2;EHD3;PACS1;SLMAP;WNK3;RAPGEF2;TNIK;RAPGEF6
Yellow	KEGG_2019_Human.25	Apelin signaling pathway	27/137	6.44601e-05	0.00066265	2.53893	24.4993	HDAC4;RYR2;PRKAA2;ITPR1;ADCY3;ADCY1;SLC8A1;RYR3;SLC8A2;ADCY5;AKT3;MAPK1;MEF2D;MEF2A;SMAD2;PRKAB2;SMAD4;SMAD3;PRKCE;MTOR;ADCY9;MRAS;GNAQ;CAMK4;GNB1;PIK3C3;PLCB1
Yellow	GO_Biological_Process_2018.51	regulation of myeloid cell differentiation (GO:0045637)	18/65	9.44422e-06	0.000672099	3.95491	45.7587	KMT2E;KMT2D;CREBBP;KMT2A;PRKCB;KMT2C;ZBTB16;KMT2B;PURB;TNRC6C;NR4A3;AGO3;SIN3A;AGO1;EP300;PTK2B;ZFPM1;TNRC6B
Yellow	GO_Biological_Process_2018.52	protein modification by small protein conjugation (GO:0032446)	62/398	9.44571e-06	0.000672099	1.92331	22.2526	UBE3C;ARRB1;UBE3B;BACH2;HERC4;HERC3;HERC2;SENP5;ENC1;ARIH1;BTRC;RNF111;HERC6;NUP214;MYLIP;SHPRH;RNF44;USP7;AREL1;NUP210;NUP133;FBXW7;LMO7;PJA2;GAN;HECW2;HECW1;BIRC6;NUP98;CUL9;KLHL18;POM121;PRKDC;NEDD4L;UBR3;UBR2;UBR1;CBL;FBXL21;VCPIP1;RNF213;HECTD1;CAND1;HECTD4;TPR;UBR5;RANBP2;KLHL29;HACE1;NUP155;SMURF2;USP9X;HUWE1;KLHL3;NUP153;KBTBD11;MIB1;NEDD4;TRIP12;UBA1;TRIM33;ASB1
Yellow	GO_Biological_Process_2018.53	protein localization to cell periphery (GO:1990778)	26/117	9.79534e-06	0.000683825	2.95678	34.1024	STXBP1;LIN7A;DPP6;TSPAN5;SPTBN1;PACSIN1;CLASP2;ACTN2;KCNB1;KCNB2;TTC7B;MYO5A;ANK2;ANK3;ANK1;EFR3B;GAK;RAB10;CACNB2;EHD3;PACS1;SLMAP;WNK3;RAPGEF2;TNIK;RAPGEF6
Yellow	DisGeNET.145	Infantile Severe Myoclonic Epilepsy	12/33	1.41384e-05	0.000700677	5.88934	65.764	EPHA5;PRRT2;CACNB4;STXBP1;SCN8A;CACNA1A;RAPGEF2;SAMD12;SCN2A;GPHN;MTOR;SCN1A
Yellow	DisGeNET.146	Mood Disorders	54/336	1.4263e-05	0.000702013	1.99264	22.2336	CHRM2;GABRB2;GSK3B;PPP1R13B;CRTC1;ATP2A2;LAMC2;ADARB1;PPP1R9B;YY1;GRM3;GRM2;HTR6;PCLO;CHL1;RGS6;DST;VPS13A;ANK3;CBFA2T2;CRY2;NUP98;KCTD12;PLCB1;CLOCK;SHANK3;GRIA1;HDAC4;DCTN1;SLC1A2;ADCY3;HTT;CACNA1D;ADCY1;CACNA1C;NLK;PRKCZ;NPAS2;ARNTL;TRPM2;GRIN2A;MAP2;CNR1;TPPP;ATF7IP;NTRK2;SLC12A5;NTRK3;DCLK2;DLG3;DLG4;MYO5B;AGO2;HCN1
Yellow	DisGeNET.147	Developmental Disabilities	33/170	1.46149e-05	0.000714438	2.49641	27.7937	CHRNA4;FOXG1;KCNC3;PTEN;ATP2A2;CBL;PKD1;EGFR;MECP2;RAI1;NIPBL;MAPK1;ZBTB7A;UVRAG;NTRK2;CREBBP;SMAD4;CDKL5;PRRT2;USP9X;PDE4D;ATRX;VPS13B;NR4A2;ASXL1;ZEB2;DLG2;KAT6B;KCNQ2;SPECC1L;NF1;CNTN4;SHANK3
Yellow	Reactome_2016.59	Recycling pathway of L1 Homo sapiens R-HSA-437239	10/26	4.21757e-05	0.000793474	6.43594	64.8336	DNM3;RPS6KA3;NUMB;MAPK1;AP2A1;AP2B1;L1CAM;AP2A2;SH3GL2;DNM1
Yellow	WikiPathways_2019_Human.12	Insulin Signaling WP481	31/160	2.72361e-05	0.000831589	2.4888	26.1597	SNAP25;GSK3B;SHC3;PRKAA2;STXBP1;SRF;PTEN;CBL;PRKCZ;PTPRF;RPS6KA3;MAPK9;MAPK8;MAPK1;MAP3K9;MAP3K4;MAP3K5;CAP1;PRKCB;PDPK1;INSR;MINK1;TSC2;TSC1;SORBS1;MTOR;INPP4A;ARHGAP33;MAPK10;PIK3C3;MAP3K13
Yellow	WikiPathways_2019_Human.13	Alzheimers Disease WP2059	20/83	2.94568e-05	0.000831589	3.27916	34.2101	APP;GSK3B;LRP1;ITPR1;ATP2A2;ADAM10;CACNA1D;CACNA1C;GRIN2C;GRIN2B;RYR3;GRIN1;CASP9;ERN1;BACE1;GRIN2A;GNAQ;MAPK1;PLCB1;ATF6
Yellow	Reactome_2016.60	Depolarization of the Presynaptic Terminal Triggers the Opening of Calcium Channels Homo sapiens R-HSA-112308	7/13	4.59857e-05	0.000850735	12	119.846	CACNB1;CACNB2;CACNB4;CACNA1B;CACNA2D3;CACNA1A;CACNA1E
Yellow	DisGeNET.148	Short nose	34/179	1.76471e-05	0.00085684	2.43047	26.6014	ATP6V1A;SETD5;TRIO;KMT2A;FOXG1;PTEN;MLLT1;UBE3B;UBR1;NALCN;AFF4;RAI1;SMCHD1;NIPBL;SIN3A;KIF1A;SLC12A6;GTF2I;MBD5;IQSEC2;ABCC8;PDE4D;MARS2;ATRX;CASK;LIFR;BRAF;MTOR;FOXP1;SETBP1;SPECC1L;TRIP11;RAB3GAP2;UBA1
Yellow	DisGeNET.149	Reticulocyte count (procedure)	37/202	1.79571e-05	0.000866037	2.32576	25.4148	INO80D;CELF1;PTPRN;MAST2;USP34;GPALPP1;JMJD1C;ADCY3;FOXK2;CBL;HK1;ATXN2;ATXN1;HERC1;ASCC2;BSN;SH2B3;SPECC1;USP48;ARL15;PRKCE;FNDC3B;VPS13A;EIF2AK4;AP2B1;ANK1;SPTB;ATRN;SLC25A37;EHD3;KANSL1;ARHGEF3;STRN;NCOA7;TLN2;RGL1;ZFPM1
Yellow	DisGeNET.150	Pointed chin	15/50	1.81284e-05	0.000868474	4.42112	48.2699	SETD2;ABCC8;ANKRD11;KCNAB2;BCR;SKI;SYNGAP1;SETBP1;NSD1;CDH11;MAPK1;TUBGCP6;DNM1L;SHANK3;GTF2I
Yellow	GO_Biological_Process_2018.54	positive regulation of transcription from RNA polymerase II promoter (GO:0045944)	112/848	1.27052e-05	0.000870541	1.59719	18.0059	APP;CCNT2;CRTC1;MAML1;PRDM2;AHR;RBPJ;DCAF6;RPS6KA3;ZNF609;ZMIZ1;ZMIZ2;EP300;KAT7;RNF111;MEN1;MEF2A;DDX17;ZBTB38;PGR;ZFPM2;ATF6;CLOCK;ZFPM1;KMT2D;KMT2A;DHX9;PRKDC;TNKS;NPAS2;HELZ2;RAI1;CAMTA2;PPARGC1B;BCL9L;SMAD2;CREBBP;SMAD4;SMAD3;POU2F1;BCL11B;SUPT5H;SETX;NR4A2;BMP2;NR4A3;AGO1;AGO2;CDK12;CDK13;OGT;NFE2L1;CSRNP2;BMPR2;PTPRN;CHD8;ARRB1;TCF20;LDB2;MYSM1;PKD1;IRF2BPL;MED12;MED14;NIPBL;MED13;SIN3A;NC…
Yellow	KEGG_2019_Human.26	FoxO signaling pathway	26/132	8.81789e-05	0.000871614	2.53627	23.679	PRKAA2;FOXG1;SETD7;AGAP2;PTEN;NLK;EGFR;MAPK9;MAPK8;AKT3;EP300;MAPK1;SMAD2;USP7;PRKAB2;CREBBP;SMAD4;SMAD3;HOMER1;HOMER2;PDPK1;INSR;PLK2;BRAF;MAPK10;ATM
Yellow	DisGeNET.151	Broad cranium shape	26/121	1.84455e-05	0.000872033	2.83166	30.8671	FBN2;SETD5;KMT2A;UBE3B;NALCN;MECP2;UNC80;RAI1;NIPBL;CYP26B1;PCLO;ZSWIM6;SLC12A6;GRIA3;MBD5;IQSEC2;USP9X;PDE4D;KCNAB2;HCFC1;MED13L;SKI;SETBP1;CDH11;RAB3GAP2;TECPR2
Yellow	DisGeNET.152	Wide skull shape	26/121	1.84455e-05	0.000872033	2.83166	30.8671	FBN2;SETD5;KMT2A;UBE3B;NALCN;MECP2;UNC80;RAI1;NIPBL;CYP26B1;PCLO;ZSWIM6;SLC12A6;GRIA3;MBD5;IQSEC2;USP9X;PDE4D;KCNAB2;HCFC1;MED13L;SKI;SETBP1;CDH11;RAB3GAP2;TECPR2
Yellow	Reactome_2016.61	Signaling by TGF-beta Receptor Complex Homo sapiens R-HSA-170834	18/73	5.24473e-05	0.00095437	3.37816	33.2941	SMAD2;SMAD4;CCNT2;SMAD3;PARP1;SMURF2;ZFYVE9;USP9X;NEDD4L;MTMR4;CBL;PRKCZ;NCOR2;SKI;NCOR1;RNF111;TRIM33;MEN1
Yellow	Reactome_2016.62	Fc epsilon receptor (FCERI) signaling Homo sapiens R-HSA-2454202	59/395	5.35576e-05	0.000958854	1.82705	17.9686	GSK3B;PTEN;ARRB1;CASP9;SPRED2;SYNGAP1;RASGEF1A;AKT3;NEFL;PIP4K2B;PIP4K2C;BTRC;SPTAN1;JAK1;ACTN2;PDPK1;PAQR3;TSC2;FRS2;PPP2R5D;KSR2;SPTB;CNKSR2;PSME4;AKAP9;KIT;RAPGEF2;PHLPP2;SHC3;CAMK2A;ITPR1;RASAL2;RASGRP1;EGFR;MAPK9;GRIN2A;MAPK8;MAPK1;RICTOR;PIP5K1C;SPTBN1;SPTBN2;INSR;FN1;BRAF;GRIN2C;GRIN2B;MTOR;PTK2;GRIN1;TNRC6C;MAPK10;AGO3;DLG4;AGO1;AGO2;NF1;TAB3;TNRC6B
Yellow	GO_Biological_Process_2018.55	calcium ion transmembrane transport (GO:0070588)	21/86	1.51071e-05	0.00101629	3.33871	37.0608	SLC24A2;TRPC5;SLC24A4;ATP2B4;ATP2A2;CACNA1A;CACNA1D;CACNA1C;GRIN2C;PKD1;NALCN;GRIN2B;RYR3;SLC8A1;SLC8A2;LETM1;TRPM2;CACNG8;GRIN2A;SLC25A23;CACNG3
Yellow	Reactome_2016.63	Signaling by Robo receptor Homo sapiens R-HSA-376176	11/32	5.89641e-05	0.00103889	5.3955	52.5446	ROBO2;CAP1;ABL2;ARHGAP39;SLIT2;SRGAP3;SRGAP2;CLASP1;ROBO1;CAP2;CLASP2
Yellow	DisGeNET.153	Calcification of coronary artery	58/375	2.24184e-05	0.00105293	1.90465	20.3904	DAGLA;CTNND2;CELF2;CHD6;FRY;CELSR2;BACH2;PTPRG;SYNE1;GRIP1;GRM5;ADAMTS3;HERC1;AP1G1;PHACTR1;RNF111;PCDHAC2;ANKS1B;RBFOX1;CERS6;ZBTB38;PDE4D;STARD9;MAGI2;ADAM10;FRMD4A;NAV1;KSR2;GABRG3;AP3B2;SORCS2;ARID1B;DNM3;LMBRD2;PHLPP2;PRICKLE2;PKD1L3;NKAIN3;ATXN1;CHST11;SV2B;HECTD4;ATXN1L;CSMD1;UGGT1;OPCML;PTPRN2;CEP350;CADPS;KIAA1549L;PLEKHA6;ATP2B2;LRP1B;TTC39B;DLG4;RGL1;CNIH3;ADGRL2
Yellow	Reactome_2016.64	Phase 1 - inactivation of fast Na+ channels Homo sapiens R-HSA-5576894	10/27	6.16643e-05	0.00106845	6.05703	58.7156	CACNB1;CACNB2;CACNG8;CACNB4;KCND2;KCND3;CACNA2D3;CACNA1D;CACNA1C;CACNG3
Yellow	Reactome_2016.65	Mitochondrial biogenesis Homo sapiens R-HSA-1592230	14/49	6.2567e-05	0.00106845	4.12404	39.9177	NCOA1;NCOA2;MED1;PRKAB2;CREBBP;PRKAA2;CHD9;NCOA6;HCFC1;HELZ2;NCOR1;CARM1;MEF2D;PPARGC1B
Yellow	DisGeNET.154	Generalized tonic seizures	7/12	2.29944e-05	0.00107297	14.4008	153.804	GNAO1;MAPK10;SCN8A;STXBP1;KCNQ2;DNM1;SCN1A
Yellow	DisGeNET.155	Underdeveloped nasal alae	18/69	2.31658e-05	0.001074	3.64392	38.8909	HDAC4;GABBR2;KCNJ6;CDKL5;SRCAP;FOXG1;STXBP1;ANKRD11;UBR1;NALCN;MECP2;BCR;GRIP1;FRAS1;SIN3A;MAPK1;PCNT;PLEC
Yellow	Reactome_2016.66	Insulin receptor signalling cascade Homo sapiens R-HSA-74751	46/287	6.38695e-05	0.00107417	1.98156	19.1392	SHC3;PRKAA2;CAMK2A;ARRB1;RASAL2;RASGRP1;EGFR;RPTOR;SPRED2;GRIN2A;SYNGAP1;RASGEF1A;NEFL;MAPK1;SPTAN1;SPTBN1;SPTBN2;JAK1;PRKAB2;ACTN2;STRADA;PDPK1;INSR;PAQR3;FN1;TSC2;FRS2;BRAF;TSC1;PPP2R5D;KSR2;GRIN2C;GRIN2B;SPTB;PTK2;MTOR;GRIN1;CNKSR2;DLG4;AKAP9;PSME4;KIT;NF1;RAPGEF2;PIK3C3;EIF4G1
Yellow	GO_Biological_Process_2018.56	regulation of dendrite morphogenesis (GO:0048814)	14/44	1.62718e-05	0.0010751	4.8127	53.0652	EPHA4;CDKL5;LRRK2;NEDD4L;SRCIN1;ARHGAP44;SIPA1L1;CUX2;HECW2;NEDD4;HECW1;RAPGEF2;TNIK;SHANK3
Yellow	DisGeNET.156	Ataxia, Appendicular	16/57	2.43063e-05	0.00111557	4.02669	42.7827	EGR3;KCND3;KCNC3;GABRA4;CACNA1A;SYT14;PRICKLE1;CLCN2;SYNE1;SETX;ATXN2;CACNB4;ATXN1;SCN8A;SPTBN2;HCN1
Yellow	DisGeNET.157	Cerebellar Dysmetria	20/82	2.43731e-05	0.00111557	3.33223	35.3951	PRKCG;GRID2;MARS2;ATP1A3;VLDLR;PRICKLE1;TTC19;SYNE1;SETX;ATXN2;ATXN1;POLR3A;OPA1;OPHN1;SCN8A;SACS;KIF1A;TECPR2;GTF2I;SPTBN2
Yellow	DisGeNET.158	Brachycephaly	27/130	2.4542e-05	0.00111619	2.71253	28.7939	FBN2;SETD5;KMT2A;UBE3B;NALCN;MECP2;UNC80;RAI1;NIPBL;CYP26B1;PCLO;ZSWIM6;SLC12A6;GRIA3;MBD5;IQSEC2;USP9X;PDE4D;KCNAB2;HCFC1;MED13L;SKI;BMP2;SETBP1;CDH11;RAB3GAP2;TECPR2
Yellow	DisGeNET.159	Convulsive Seizures	24/109	2.49604e-05	0.00112156	2.91963	30.9429	RBFOX1;CHRM1;CDKL5;SLC12A5;CHRNA4;CHRNA7;FOXG1;SLC1A1;KCNA2;TSC2;TSC1;OPRM1;SYN2;SLC8A1;MIB1;MECP2;LETM1;CNR1;SCN8A;KCNQ2;SLC17A7;MPDZ;SCN1A;HCN1
Yellow	DisGeNET.160	Substance-Related Disorders	26/123	2.49722e-05	0.00112156	2.77297	29.3873	CHRM2;FHOD3;OPRD1;PCDH15;PTEN;XYLT1;AFF3;SYNE1;GRM5;ABLIM1;SLK;CNR1;NRCAM;CSMD3;CSMD1;KLF12;CERS6;PRKCE;INSR;SLC2A13;FRMD4A;ANK3;OPRM1;TIAM2;PACS1;XKR4
Yellow	DisGeNET.161	Ataxia, Spinocerebellar	25/116	2.51296e-05	0.00112162	2.84144	30.095	NFAT5;KCNC3;LRRK2;KCNA1;ITPR1;KCNA3;CACNA1A;HTT;LAMC2;TTBK2;ATXN2;ATXN1;JPH3;ATXN1L;MAPK1;SPTBN2;PRKCG;RUBCN;CREBBP;GRID2;KCND3;ETV1;SYT14;CCDC88C;CNTN4
Yellow	DisGeNET.162	Cerebellar atrophy	35/190	2.64059e-05	0.00117131	2.34059	24.6743	CNTNAP1;ATP8A2;KCNC3;ITPR1;CACNA1A;HTT;VLDLR;TTBK2;SYNE1;ATXN2;ATXN1;PCLO;HERC1;OPA1;VPS53;KCNN3;KIF1A;SERAC1;SPTAN1;SPTBN2;PRKCG;GRID2;COG5;KCND3;MARS2;SYT14;TTC19;SETX;POLR3A;COL4A1;SCN8A;ATM;ACO2;ERCC6;SCN2A
Yellow	GO_Biological_Process_2018.57	negative regulation of cell migration (GO:0030336)	26/121	1.84455e-05	0.00119734	2.83166	30.8671	PTPRR;MCTP1;LRP1;PTEN;PTPRJ;MIA3;ADARB1;LDLRAD4;PTPN23;PTPRG;ROBO1;ACVR1C;SRGAP3;SLIT2;ARID2;SRGAP2;SCAI;CLASP1;CLASP2;TCAF1;MAGI2;STK24;NAV3;DLC1;NF1;TRIB1
Yellow	WikiPathways_2019_Human.14	Cell-type Dependent Selectivity of CCK2R Signaling WP3679	7/13	4.59857e-05	0.00120548	12	119.846	RYR2;DAGLA;CNR1;GNAQ;ITPR1;PLCB1;RYR3
Yellow	Reactome_2016.67	Serotonin Neurotransmitter Release Cycle Homo sapiens R-HSA-181429	8/18	7.44396e-05	0.00123325	8.23141	78.2439	SNAP25;RIMS1;SYT1;STXBP1;SYN3;SYN2;SYN1;PPFIA3
Yellow	GO_Biological_Process_2018.58	axon development (GO:0061564)	22/94	1.96393e-05	0.00125285	3.15822	34.2287	APP;BRSK1;LINGO1;NTNG2;BRSK2;DCC;PLPPR4;MTR;ANK3;L1CAM;ARHGAP35;CAMSAP2;RAB10;SLITRK1;MAP1B;MAP1A;ADGRB1;NRCAM;SLIT3;SLIT2;CNTN4;EPHB3
Yellow	DisGeNET.163	Epileptic Seizures	23/103	2.88199e-05	0.00127055	2.97198	31.0704	RBFOX1;CHRM1;CDKL5;SLC12A5;CHRNA4;CHRNA7;FOXG1;SLC1A1;KCNA2;TSC2;TSC1;OPRM1;SYN2;SLC8A1;MIB1;MECP2;LETM1;CNR1;KCNQ2;SLC17A7;MPDZ;SCN1A;HCN1
Yellow	KEGG_2019_Human.27	Parathyroid hormone synthesis, secretion and action	22/106	0.000135516	0.00128991	2.70526	24.0941	PRKCG;MEF2A;ARHGEF11;PRKCB;PDE4D;ITPR1;ADCY3;BRAF;ARRB1;ADCY1;EGFR;ADCY5;NR4A2;AKAP13;ADCY9;MMP16;GNAQ;MMP17;PDE4A;MAPK1;PLCB1;MEF2D
Yellow	DisGeNET.164	Narrow palate	11/30	2.94959e-05	0.00129243	5.96411	62.2131	MED12;SKI;ASXL1;RPS6KA3;CREBBP;HERC2;SETBP1;KANSL1;NSD1;EP300;SOX5
Yellow	DisGeNET.165	Smooth philtrum	17/64	3.01048e-05	0.00131111	3.73307	38.8643	ATP6V1A;SRCAP;USP9X;FOXG1;ANKRD11;COG1;UBE3B;NALCN;PTPRF;MTOR;MED12;UNC80;BCR;SIN3A;PACS1;SPECC1L;MAPK1
Yellow	GO_Biological_Process_2018.59	regulation of GTPase activity (GO:0043087)	35/188	2.09213e-05	0.00131201	2.37145	25.5517	USP6NL;GSK3B;RABGAP1;DOCK9;LRRK2;RAP1GDS1;SNX13;RASGRP1;ARHGAP35;ABR;ARHGAP21;SIPA1L1;FGD6;CHN1;PLXNA2;SRGAP2;RGS6;PLXNA4;EPHB3;EPHA5;ARFGEF1;EPHA4;BCAS3;NTRK2;CDKL5;RIC1;OCRL;PTK2;BCR;AFDN;ALS2;NF1;RAPGEF2;RAB3GAP2;RAPGEF6
Yellow	DisGeNET.166	Benign neonatal epilepsy	5/6	3.06952e-05	0.00132613	51.3847	533.959	PRRT2;KCNA1;KCNQ2;KCNA3;KCNQ3
Yellow	DisGeNET.167	Severe global developmental delay	16/58	3.08187e-05	0.00132613	3.9306	40.8286	NTRK2;KCNJ6;CTNND2;STXBP1;DYRK1A;CASK;TBR1;MECP2;RPS6KA3;NIN;GNPTAB;ASXL3;DYM;RAB3GAP2;ACO2;ERCC6
Yellow	DisGeNET.168	Visual seizure	37/207	3.13059e-05	0.00133907	2.25673	23.4061	GRIA1;PCSK1;CHRM1;CHRNA4;FOXG1;KCNA1;CHRNA7;KCNA2;SLC1A1;PRICKLE1;SLC8A1;MECP2;ANKH;CNR1;PDE4A;SLC17A7;MPDZ;MAP3K5;RBFOX1;GABBR1;CDKL5;SLC12A5;SYT1;ABCC8;TSC2;TSC1;OPRM1;SYN2;SREBF2;MIB1;LETM1;MAP1B;SYT10;KCNQ2;DCX;SCN2B;HCN1
Yellow	Reactome_2016.68	LGI-ADAM interactions Homo sapiens R-HSA-5682910	7/14	8.49005e-05	0.00138588	10.2851	96.4133	STX1B;CACNG8;DLG4;ADAM23;ADAM11;ADAM22;CACNG3
Yellow	GO_Biological_Process_2018.60	neuromuscular junction development (GO:0007528)	9/20	2.30455e-05	0.00142114	8.42279	89.9388	CACNB1;CACNB2;UNC13A;CACNB4;LRRK2;NEDD4;NRDC;ANK3;GPHN
Yellow	DisGeNET.169	Thin upper lip vermilion	26/125	3.35201e-05	0.0014253	2.71665	27.9907	SETD5;KMT2A;UBE3B;CACNA1C;NALCN;MED12;UNC80;NIPBL;HERC2;OPHN1;MAPK1;SMAD4;MBD5;AGL;ATRX;ARID1B;MTOR;GATAD2B;CIT;BCR;SON;SETBP1;PACS1;KAT6A;SPECC1L;CDK13
Yellow	DisGeNET.170	Mental Retardation, X-Linked	25/118	3.40766e-05	0.00144044	2.78003	28.5979	CHM;CHD3;GPHN;AFF2;PHF8;MECP2;MED12;RPS6KA3;KIAA1109;OPHN1;PTCHD1;FAM120C;GRIA3;CDKL5;IQSEC2;ATRX;HUWE1;CASK;OCRL;L1CAM;HCFC1;ARHGEF9;DLG3;IL1RAPL2;WNK3
Yellow	GO_Biological_Process_2018.61	ephrin receptor signaling pathway (GO:0048013)	20/82	2.43731e-05	0.00147837	3.33223	35.3951	EPHA5;ACTR2;EPHA4;EPHA7;EPHA6;ARHGEF28;ITSN1;AP2A1;WASL;AP2B1;AP2A2;KALRN;GRIN2B;DNM1;PTK2;TIAM1;SIPA1L1;CHN1;GIT1;EPHB3
Yellow	GO_Biological_Process_2018.62	negative regulation of TOR signaling (GO:0032007)	13/40	2.52131e-05	0.00148077	4.96349	52.5541	SZT2;PRKAA2;TSC2;UBR2;TSC1;UBR1;C12ORF66;ARNTL;PREX2;DEPTOR;SESN3;TMEM127;ATM
Yellow	GO_Biological_Process_2018.63	neuron migration (GO:0001764)	13/40	2.52131e-05	0.00148077	4.96349	52.5541	NTRK2;CDKL5;USP9X;SEMA3A;NAV1;NR4A2;DCX;SPOCK1;RAPGEF2;NRCAM;KIAA0319;MARK1;ADGRL3
[truncated: 733 more rows]

## Sheet: m.AMY
Module	Database	Term	Overlap	P.value	Adjusted.P.value	Odds.Ratio	Combined.Score	Genes
[truncated: 1,626 more rows]

## Sheet: f.NAc
Module	Database	Term	Overlap	P.value	Adjusted.P.value	Odds.Ratio	Combined.Score	Genes
[truncated: 1,944 more rows]

[truncated: 7 more sheets: m.NAc, f.PFC, m.PFC, f.DMS, m.DMS, f.VTA, m.VTA]
